# Supplementary material for: Integrative Transcriptomic Profiling of the Wilms Tumor
Source: Cancers (Basel). 2023 Jul 28;15(15):3846. doi: 10.3390/cancers15153846 (PMC10416970; doi:10.3390/cancers15153846)
Supplement: Supplementary file 1 [file cancers-15-03846-s001.zip]

Archive with 5 entries (5 files):
- Supplementary Figure S1.pdf
- Supplementary Table S1-S6, S8.pdf
- Supplementary Table S2c.csv
- Supplementary Table S4c.csv
- Supplementary Table S7.csv
