# Supplementary material for: Integrative Transcriptomic Profiling of the Wilms Tumor
Source: Cancers (Basel). 2023 Jul 28;15(15):3846. doi: 10.3390/cancers15153846 (PMC10416970; doi:10.3390/cancers15153846)
Supplement: Supplementary file 1 [file cancers-15-03846-s001.zip › Supplementary Table S1-S6, S8.pdf]

**Supplementary:**  
**INTEGRATIVE TRANSCRIPTOMIC PROFILING OF WILMS TUMOR**

Supplementary Table S1: Histological characteristics of FFT samples included in the analysis of differentially expressed miRNAs in fresh frozen tissue Wilms tumor samples.

| Patient No. | Healthy Tissue No. | Tumor Tissue No. | FFT tumor histology            | <i>HR/nHR</i> | <i>Local WT sample Stage</i> |
|-------------|--------------------|------------------|--------------------------------|---------------|------------------------------|
| 1           | 1N                 | 1T               | 50% B, 35% E, 10% S, 5% R      | nHR           | III                          |
| 2           | 2N                 | 2T               | 60% E, 25% B, 5% R, 5% S, 5% A | HR            | I                            |
| 3           | 3N                 | 3T               | 95% B, 5% E                    | nHR           | I                            |
| 4           | 4N                 | 4T               | 45%S, 45% E, 10% HK            | nHR           | I                            |
| 5           | 5N                 | 5T               | 75% E, 25% S                   | nHR           | I                            |
| 6           | 6N                 | 6T               | 75% TNe, 10% S, 10% R, 3-5% E  | nHR           | II                           |
| 7           | 7N                 | 7T               | 100 % B                        | HR            | III                          |
| 8           | 8N                 | 8T               | 60% B, 40% S                   | nHR           | III                          |
| 9           | 9N                 | 9T               | 40% R, 30% B, 30% E            | nHR           | I                            |
| 10          | 10N                | 10T              | 90% B, 10%E                    | HR            | III                          |

N, healthy kidney tissue; T, Wilms tumor; FFT, fresh frozen tissue; %, the percentage of each histology component; S, stromal; R, regressive; B, blastemal; E, epithelial; A, anaplasia; TNe, tumor necrosis; HK, healthy kidney tissue. Sample 6 – necrosis, not included in further analysis. No malignant changes were detected in healthy tissue samples. High-Risk (HR), non-High-Risk (nHR) and local WT sample stage were assessed by the SIOP RTSG pathology protocol.

## Supplementary: INTEGRATIVE TRANSCRIPTOMIC PROFILING OF WILMS TUMOR

Supplementary Table S2: Differentially expressed miRNAs in FFT samples of WT identified using at least three differential expression tools (sRNade tool). Table S2a) shows decreased miRNA expression in WT, and Table S2b) shows increased miRNA expression in WT compared to normal renal tissue.

| <i>S2a) Decreased expression of FFT miRNA</i> | <i>No. DE Tools</i> | <i>DE tools</i>                           |
|-----------------------------------------------|---------------------|-------------------------------------------|
| hsa-miR-9-5p                                  | 5                   | DESeq,NOISeq,Students t-test,DESeq2,edgeR |
| hsa-miR-514a-5p                               | 5                   | DESeq,NOISeq,Students t-test,DESeq2,edgeR |
| hsa-miR-514a-3p                               | 5                   | DESeq,NOISeq,Students t-test,DESeq2,edgeR |
| hsa-miR-509-5p                                | 5                   | DESeq,NOISeq,Students t-test,DESeq2,edgeR |
| hsa-miR-509-3p                                | 5                   | DESeq,NOISeq,Students t-test,DESeq2,edgeR |
| hsa-miR-509-3-5p                              | 5                   | DESeq,NOISeq,Students t-test,DESeq2,edgeR |
| hsa-miR-508-3p                                | 5                   | DESeq,NOISeq,Students t-test,DESeq2,edgeR |
| hsa-miR-506-3p                                | 5                   | DESeq,NOISeq,Students t-test,DESeq2,edgeR |
| hsa-miR-30c-2-3p                              | 5                   | DESeq,NOISeq,Students t-test,DESeq2,edgeR |
| hsa-miR-30a-5p                                | 5                   | DESeq,NOISeq,Students t-test,DESeq2,edgeR |
| hsa-miR-217-5p                                | 5                   | DESeq,NOISeq,Students t-test,DESeq2,edgeR |
| hsa-miR-216b-5p                               | 5                   | DESeq,NOISeq,Students t-test,DESeq2,edgeR |
| hsa-miR-215-5p                                | 5                   | DESeq,NOISeq,Students t-test,DESeq2,edgeR |
| hsa-miR-204-5p                                | 5                   | DESeq,NOISeq,Students t-test,DESeq2,edgeR |
| hsa-miR-203a-3p                               | 5                   | DESeq,NOISeq,Students t-test,DESeq2,edgeR |
| hsa-miR-200b-3p                               | 5                   | DESeq,NOISeq,Students t-test,DESeq2,edgeR |
| hsa-miR-200a-5p                               | 5                   | DESeq,NOISeq,Students t-test,DESeq2,edgeR |
| hsa-miR-200a-3p                               | 5                   | DESeq,NOISeq,Students t-test,DESeq2,edgeR |
| hsa-miR-194-5p                                | 5                   | DESeq,NOISeq,Students t-test,DESeq2,edgeR |
| hsa-miR-194-3p                                | 5                   | DESeq,NOISeq,Students t-test,DESeq2,edgeR |
| hsa-miR-192-5p                                | 5                   | DESeq,NOISeq,Students t-test,DESeq2,edgeR |
| hsa-miR-190a-5p                               | 5                   | DESeq,NOISeq,Students t-test,DESeq2,edgeR |
| hsa-miR-187-3p                                | 5                   | DESeq,NOISeq,Students t-test,DESeq2,edgeR |
| hsa-miR-184                                   | 5                   | DESeq,NOISeq,Students t-test,DESeq2,edgeR |
| hsa-miR-141-3p                                | 5                   | DESeq,NOISeq,Students t-test,DESeq2,edgeR |
| hsa-miR-139-5p                                | 5                   | DESeq,NOISeq,Students t-test,DESeq2,edgeR |
| hsa-miR-139-3p                                | 5                   | DESeq,NOISeq,Students t-test,DESeq2,edgeR |
| hsa-miR-12135                                 | 5                   | DESeq,NOISeq,Students t-test,DESeq2,edgeR |
| hsa-miR-934                                   | 4                   | DESeq,NOISeq,DESeq2,edgeR                 |
| hsa-miR-891a-5p                               | 4                   | DESeq,Students t-test,DESeq2,edgeR        |
| hsa-miR-6500-3p                               | 4                   | DESeq,Students t-test,DESeq2,edgeR        |
| hsa-miR-5588-5p                               | 4                   | DESeq,Students t-test,DESeq2,edgeR        |
| hsa-miR-514b-5p                               | 4                   | DESeq,Students t-test,DESeq2,edgeR        |
| hsa-miR-514b-3p                               | 4                   | DESeq,Students t-test,DESeq2,edgeR        |
| hsa-miR-513a-5p                               | 4                   | DESeq,Students t-test,DESeq2,edgeR        |
| hsa-miR-510-5p                                | 4                   | DESeq,Students t-test,DESeq2,edgeR        |
| hsa-miR-508-5p                                | 4                   | DESeq,NOISeq,DESeq2,edgeR                 |
| hsa-miR-429                                   | 4                   | NOISeq,Students t-test,DESeq2,edgeR       |
| hsa-miR-378a-3p                               | 4                   | NOISeq,Students t-test,DESeq2,edgeR       |
| hsa-miR-362-5p                                | 4                   | NOISeq,Students t-test,DESeq2,edgeR       |
| hsa-miR-30b-5p                                | 4                   | NOISeq,Students t-test,DESeq2,edgeR       |
| hsa-miR-23a-5p                                | 4                   | DESeq,Students t-test,DESeq2,edgeR        |
| hsa-miR-22-3p                                 | 4                   | NOISeq,Students t-test,DESeq2,edgeR       |
| hsa-miR-216a-5p                               | 4                   | DESeq,Students t-test,DESeq2,edgeR        |
| hsa-miR-216a-3p                               | 4                   | DESeq,Students t-test,DESeq2,edgeR        |
| hsa-miR-200c-3p                               | 4                   | NOISeq,Students t-test,DESeq2,edgeR       |
| hsa-miR-192-3p                                | 4                   | DESeq,Students t-test,DESeq2,edgeR        |
| hsa-miR-141-5p                                | 4                   | DESeq,Students t-test,DESeq2,edgeR        |
| hsa-miR-138-5p                                | 4                   | DESeq,Students t-test,DESeq2,edgeR        |
| hsa-miR-660-3p                                | 3                   | Students t-test,DESeq2,edgeR              |
| hsa-miR-532-5p                                | 3                   | Students t-test,DESeq2,edgeR              |
| hsa-miR-532-3p                                | 3                   | Students t-test,DESeq2,edgeR              |
| hsa-miR-502-5p                                | 3                   | Students t-test,DESeq2,edgeR              |
| hsa-miR-500b-5p                               | 3                   | Students t-test,DESeq2,edgeR              |
| hsa-miR-497-5p                                | 3                   | Students t-test,DESeq2,edgeR              |
| hsa-miR-4802-3p                               | 3                   | Students t-test,DESeq2,edgeR              |
| hsa-miR-455-5p                                | 3                   | Students t-test,DESeq2,edgeR              |
| hsa-miR-422a                                  | 3                   | Students t-test,DESeq2,edgeR              |
| hsa-miR-378i                                  | 3                   | Students t-test,DESeq2,edgeR              |
| hsa-miR-378h                                  | 3                   | Students t-test,DESeq2,edgeR              |
| hsa-miR-378g                                  | 3                   | Students t-test,DESeq2,edgeR              |
| hsa-miR-378f                                  | 3                   | Students t-test,DESeq2,edgeR              |

## Supplementary:

### INTEGRATIVE TRANSCRIPTOMIC PROFILING OF WILMS TUMOR

|                  |   |                              |
|------------------|---|------------------------------|
| hsa-miR-378e     | 3 | Students t-test,DESeq2,edgeR |
| hsa-miR-378d     | 3 | Students t-test,DESeq2,edgeR |
| hsa-miR-378c     | 3 | Students t-test,DESeq2,edgeR |
| hsa-miR-378a-5p  | 3 | Students t-test,DESeq2,edgeR |
| hsa-miR-3664-3p  | 3 | Students t-test,DESeq2,edgeR |
| hsa-miR-365b-3p  | 3 | Students t-test,DESeq2,edgeR |
| hsa-miR-365a-3p  | 3 | Students t-test,DESeq2,edgeR |
| hsa-miR-30d-5p   | 3 | Students t-test,DESeq2,edgeR |
| hsa-miR-30d-3p   | 3 | Students t-test,DESeq2,edgeR |
| hsa-miR-30c-5p   | 3 | Students t-test,DESeq2,edgeR |
| hsa-miR-30a-3p   | 3 | Students t-test,DESeq2,edgeR |
| hsa-miR-29c-5p   | 3 | Students t-test,DESeq2,edgeR |
| hsa-miR-29c-3p   | 3 | Students t-test,DESeq2,edgeR |
| hsa-miR-29b-3p   | 3 | Students t-test,DESeq2,edgeR |
| hsa-miR-29b-1-5p | 3 | Students t-test,DESeq2,edgeR |
| hsa-miR-29a-5p   | 3 | Students t-test,DESeq2,edgeR |
| hsa-miR-29a-3p   | 3 | Students t-test,DESeq2,edgeR |
| hsa-miR-22-5p    | 3 | Students t-test,DESeq2,edgeR |
| hsa-miR-211-5p   | 3 | Students t-test,DESeq2,edgeR |
| hsa-miR-204-3p   | 3 | Students t-test,DESeq2,edgeR |
| hsa-miR-203b-3p  | 3 | Students t-test,DESeq2,edgeR |
| hsa-miR-200b-5p  | 3 | Students t-test,DESeq2,edgeR |
| hsa-miR-145-5p   | 3 | Students t-test,DESeq2,edgeR |
| hsa-miR-126-5p   | 3 | Students t-test,DESeq2,edgeR |
| hsa-miR-126-3p   | 3 | Students t-test,DESeq2,edgeR |
| hsa-miR-12136    | 3 | NOISeq,DESeq2,edgeR          |

| <i>S2b) Increased expression of FFT miRNA</i> | <i>No. DE Tools</i> | <i>DE tools</i>                           |
|-----------------------------------------------|---------------------|-------------------------------------------|
| hsa-miR-135a-3p                               | 5                   | DESeq,NOISeq,Students t-test,DESeq2,edgeR |
| hsa-miR-199b-5p                               | 5                   | DESeq,NOISeq,Students t-test,DESeq2,edgeR |
| hsa-miR-106b-3p                               | 4                   | DESeq,Students t-test,DESeq2,edgeR        |
| hsa-miR-1269a                                 | 4                   | DESeq,NOISeq,DESeq2,edgeR                 |
| hsa-miR-130b-3p                               | 4                   | DESeq,NOISeq,DESeq2,edgeR                 |
| hsa-miR-130b-5p                               | 4                   | DESeq,NOISeq,DESeq2,edgeR                 |
| hsa-miR-181b-2-3p                             | 4                   | DESeq,Students t-test,DESeq2,edgeR        |
| hsa-miR-18a-5p                                | 4                   | DESeq,Students t-test,DESeq2,edgeR        |
| hsa-miR-301b-3p                               | 4                   | DESeq,NOISeq,DESeq2,edgeR                 |
| hsa-miR-6818-5p                               | 4                   | DESeq,Students t-test,DESeq2,edgeR        |
| hsa-miR-873-3p                                | 4                   | DESeq,NOISeq,DESeq2,edgeR                 |
| hsa-miR-873-5p                                | 4                   | DESeq,Students t-test,DESeq2,edgeR        |
| hsa-let-7d-5p                                 | 3                   | Students t-test,DESeq2,edgeR              |
| hsa-let-7e-3p                                 | 3                   | Students t-test,DESeq2,edgeR              |
| hsa-miR-1304-5p                               | 3                   | Students t-test,DESeq2,edgeR              |
| hsa-miR-17-5p                                 | 3                   | Students t-test,DESeq2,edgeR              |
| hsa-miR-181a-2-3p                             | 3                   | Students t-test,DESeq2,edgeR              |
| hsa-miR-181b-3p                               | 3                   | DESeq,DESeq2,edgeR                        |
| hsa-miR-182-5p                                | 3                   | NOISeq,DESeq2,edgeR                       |
| hsa-miR-183-5p                                | 3                   | NOISeq,DESeq2,edgeR                       |
| hsa-miR-196a-5p                               | 3                   | NOISeq,DESeq2,edgeR                       |
| hsa-miR-206                                   | 3                   | NOISeq,DESeq2,edgeR                       |
| hsa-miR-20a-3p                                | 3                   | Students t-test,DESeq2,edgeR              |
| hsa-miR-20a-5p                                | 3                   | Students t-test,DESeq2,edgeR              |
| hsa-miR-301a-3p                               | 3                   | DESeq,DESeq2,edgeR                        |
| hsa-miR-323a-3p                               | 3                   | DESeq,DESeq2,edgeR                        |
| hsa-miR-335-3p                                | 3                   | DESeq,DESeq2,edgeR                        |
| hsa-miR-335-5p                                | 3                   | Students t-test,DESeq2,edgeR              |
| hsa-miR-34a-5p                                | 3                   | Students t-test,DESeq2,edgeR              |
| hsa-miR-374b-3p                               | 3                   | Students t-test,DESeq2,edgeR              |
| hsa-miR-412-5p                                | 3                   | DESeq,DESeq2,edgeR                        |
| hsa-miR-433-3p                                | 3                   | NOISeq,DESeq2,edgeR                       |
| hsa-miR-4443                                  | 3                   | Students t-test,DESeq2,edgeR              |
| hsa-miR-4738-3p                               | 3                   | Students t-test,DESeq2,edgeR              |
| hsa-miR-483-3p                                | 3                   | NOISeq,DESeq2,edgeR                       |
| hsa-miR-483-5p                                | 3                   | NOISeq,DESeq2,edgeR                       |
| hsa-miR-887-5p                                | 3                   | Students t-test,DESeq2,edgeR              |
| hsa-miR-93-5p                                 | 3                   | DESeq,DESeq2,edgeR                        |
| hsa-miR-96-5p                                 | 3                   | NOISeq,DESeq2,edgeR                       |

**Supplementary:****INTEGRATIVE TRANSCRIPTOMIC PROFILING OF WILMS TUMOR**

Supplementary Table S3: Histological characteristics of FFPE samples included in the analysis of differentially expressed miRNAs in formaldehyde-fixed paraffin-embedded tissue Wilms tumor samples.

| <i>Patient No.</i> | <i>Healthy Tissue No.</i> | <i>Tumor Tissue No.</i> | <i>FFPE tumor histology</i> | <i>HR/nHR</i> | <i>Local WT sample Stage</i> |
|--------------------|---------------------------|-------------------------|-----------------------------|---------------|------------------------------|
| 1                  | 1278/00 N                 | 1278/00 T               | 100% B                      | <b>HR</b>     | III                          |
| 2                  | 2093/01 N                 | 2093/01 T               | 50% B, 50% E                | nHR           | III                          |
| 3                  | 2401/01 N                 | 2401/01 T               | 50% S, 45% E, 5% B          | nHR           | I                            |
| 4                  | 4955/01 N                 | 4955/01 T               | 70% S, 30% B                | <b>HR</b>     | I                            |
| 5                  | 4378/02 N                 | 4378/02 T               | 95% B, 5% R                 | <b>HR</b>     | II                           |
| 6                  | 5165/02 N                 | 5165/02 T               | 95% B, 5% R                 | nHR           | I                            |
| 7                  | 5970/02 N                 | 5970/02 T               | 50% S, 45% E, 5% B          | nHR           | III                          |
| 8                  | 2975/03 N                 | 2975/03 T               | 90% S, 10% R                | NHR           | I                            |
| 9                  | 4171/03 N                 | 4171/03 T               | 70% B, 20% S, 10% E         | <b>HR</b>     | II                           |
| 10                 | 1141/04 N                 | 1141/04 T               | 90% E, 10% R                | nHR           | I                            |
| 11                 | 1911/04 N                 | 1911/04 T               | 70% S, 25% E, 5% B          | nHR           | I                            |
| 12                 | 6341/05 N                 | 6341/05 T               | 100% B                      | <b>HR</b>     | I                            |
| 13                 | 4174/06 N                 | 4174/06 T               | 80% E, 20% S                | nHR           | I                            |
| 14                 | 5458/06 N                 | 5458/06 T               | 80% S, 15% B, 5% E          | nHR           | II                           |
| 15                 | 397/07 N                  | 397/07 T                | 70% E, 30% S                | nHR           | I                            |
| 16                 | 2755/07 N                 | 2755/07 T               | 45% B, 45% E, 10% S         | nHR           | I                            |
| 17                 | 5677/07 N                 | 5677/07 T               | 100% E                      | nHR           | I                            |
| 18                 | 5485/08 N                 | 5485/08 T               | 75% E, 15% S, 10% B         | nHR           | II                           |
| 19                 | 6119/08 N                 | 6119/08 T               | 100% E                      | nHR           | I                            |
| 20                 | 7251/08 N                 | 7251/08 T               | 60% S, 40% E                | nHR           | II                           |
| 21                 | 2370/09 N                 | 2370/09 T               | 80% E, 15% S, 5% B          | nHR           | I                            |
| 22                 | 3730/09 N                 | 3730/09 T               | 80% B, 20% E                | nHR           | I                            |
| 23                 | 5743/09 N                 | 5743/09 T               | 95% E, 5% S                 | nHR           | I                            |
| 24                 | 1889/10 N                 | 1889/10 T               | 75% E, 25% R                | nHR           | II                           |
| 25                 | 5618/11 N                 | 5618/11 T               | 50% E, 50% S                | nHR           | I                            |
| 26                 | 7672/13 N                 | 7672/13 T               | 60% S, 40% B                | nHR           | III                          |
| 27                 | 3491/14 N                 | 3491/14 T               | 80%S,10% R, 5% E, 5% B      | nHR           | I                            |

N-healthy kidney tissue, T-WT, %-percentage of each histology component, S-stromal, R-regressive, B-blastemal, E-epithelial. High-Risk (HR), non-High-Risk (nonHR) and local WT sample stage were assessed by the SIOP RTSG pathology protocol.

**Supplementary:****INTEGRATIVE TRANSCRIPTOMIC PROFILING OF WILMS TUMOR**

Supplementary Table S4 A, B: Differentially expressed miRNAs in FFPE samples of WT identified by at least three differential expression tools (sRNAde tool). Table 4Sa) shows decreased miRNA expression in WT, and Table 4Sb) shows increased miRNA expression in WT compared to normal renal tissue.

| <i>S4a) Decreased expression of FFPE miRNA</i> | <i>No. DE Tools</i> | <i>DE tools</i>                           |
|------------------------------------------------|---------------------|-------------------------------------------|
| hsa-miR-12135                                  | 5                   | DESeq,NOISeq,Students t-test,DESeq2,edgeR |
| hsa-miR-192-5p                                 | 5                   | DESeq,NOISeq,Students t-test,DESeq2,edgeR |
| hsa-miR-194-5p                                 | 5                   | DESeq,NOISeq,Students t-test,DESeq2,edgeR |
| hsa-miR-215-5p                                 | 5                   | DESeq,NOISeq,Students t-test,DESeq2,edgeR |
| hsa-miR-12136                                  | 4                   | NOISeq,Students t-test,DESeq2,edgeR       |
| hsa-miR-141-3p                                 | 4                   | NOISeq,Students t-test,DESeq2,edgeR       |
| hsa-miR-184                                    | 4                   | NOISeq,Students t-test,DESeq2,edgeR       |
| hsa-miR-190a-5p                                | 4                   | NOISeq,Students t-test,DESeq2,edgeR       |
| hsa-miR-200a-3p                                | 4                   | NOISeq,Students t-test,DESeq2,edgeR       |
| hsa-miR-204-5p                                 | 4                   | NOISeq,Students t-test,DESeq2,edgeR       |
| hsa-miR-30a-5p                                 | 4                   | DESeq,Students t-test,DESeq2,edgeR        |
| hsa-miR-429                                    | 4                   | NOISeq,Students t-test,DESeq2,edgeR       |
| hsa-miR-509-3-5p                               | 4                   | NOISeq,Students t-test,DESeq2,edgeR       |
| hsa-miR-514a-3p                                | 4                   | NOISeq,Students t-test,DESeq2,edgeR       |
| hsa-miR-101-3p                                 | 3                   | Students t-test,DESeq2,edgeR              |
| hsa-miR-126-3p                                 | 3                   | Students t-test,DESeq2,edgeR              |
| hsa-miR-126-5p                                 | 3                   | Students t-test,DESeq2,edgeR              |
| hsa-miR-129-5p                                 | 3                   | Students t-test,DESeq2,edgeR              |
| hsa-miR-138-5p                                 | 3                   | Students t-test,DESeq2,edgeR              |
| hsa-miR-139-5p                                 | 3                   | Students t-test,DESeq2,edgeR              |
| hsa-miR-140-5p                                 | 3                   | Students t-test,DESeq2,edgeR              |
| hsa-miR-144-3p                                 | 3                   | Students t-test,DESeq2,edgeR              |
| hsa-miR-144-5p                                 | 3                   | Students t-test,DESeq2,edgeR              |
| hsa-miR-200a-5p                                | 3                   | Students t-test,DESeq2,edgeR              |
| hsa-miR-200b-3p                                | 3                   | Students t-test,DESeq2,edgeR              |
| hsa-miR-200c-3p                                | 3                   | Students t-test,DESeq2,edgeR              |
| hsa-miR-20b-5p                                 | 3                   | Students t-test,DESeq2,edgeR              |
| hsa-miR-24-1-5p                                | 3                   | Students t-test,DESeq2,edgeR              |
| hsa-miR-27b-3p                                 | 3                   | Students t-test,DESeq2,edgeR              |
| hsa-miR-29a-3p                                 | 3                   | Students t-test,DESeq2,edgeR              |
| hsa-miR-29b-2-5p                               | 3                   | Students t-test,DESeq2,edgeR              |
| hsa-miR-29b-3p                                 | 3                   | Students t-test,DESeq2,edgeR              |
| hsa-miR-29c-3p                                 | 3                   | Students t-test,DESeq2,edgeR              |
| hsa-miR-29c-5p                                 | 3                   | Students t-test,DESeq2,edgeR              |
| hsa-miR-30a-3p                                 | 3                   | Students t-test,DESeq2,edgeR              |
| hsa-miR-30b-5p                                 | 3                   | Students t-test,DESeq2,edgeR              |
| hsa-miR-30c-2-3p                               | 3                   | Students t-test,DESeq2,edgeR              |
| hsa-miR-30c-5p                                 | 3                   | Students t-test,DESeq2,edgeR              |
| hsa-miR-30d-3p                                 | 3                   | Students t-test,DESeq2,edgeR              |
| hsa-miR-30e-5p                                 | 3                   | Students t-test,DESeq2,edgeR              |
| hsa-miR-338-3p                                 | 3                   | Students t-test,DESeq2,edgeR              |
| hsa-miR-363-3p                                 | 3                   | Students t-test,DESeq2,edgeR              |
| hsa-miR-378a-3p                                | 3                   | Students t-test,DESeq2,edgeR              |
| hsa-miR-378c                                   | 3                   | Students t-test,DESeq2,edgeR              |
| hsa-miR-378d                                   | 3                   | Students t-test,DESeq2,edgeR              |
| hsa-miR-378f                                   | 3                   | Students t-test,DESeq2,edgeR              |
| hsa-miR-422a                                   | 3                   | Students t-test,DESeq2,edgeR              |
| hsa-miR-455-5p                                 | 3                   | Students t-test,DESeq2,edgeR              |
| hsa-miR-653-5p                                 | 3                   | Students t-test,DESeq2,edgeR              |
| hsa-miR-9-5p                                   | 3                   | Students t-test,DESeq2,edgeR              |
| hsa-miR-9985                                   | 3                   | Students t-test,DESeq2,edgeR              |

| <i>S4b) Increased expression of FFPE miRNA</i> | <i>No. DE Tools</i> | <i>DE tools</i>                           |
|------------------------------------------------|---------------------|-------------------------------------------|
| hsa-miR-1269a                                  | 5                   | DESeq,NOISeq,Students t-test,DESeq2,edgeR |
| hsa-miR-483-3p                                 | 5                   | DESeq,NOISeq,Students t-test,DESeq2,edgeR |
| hsa-miR-483-5p                                 | 5                   | DESeq,NOISeq,Students t-test,DESeq2,edgeR |
| hsa-miR-873-5p                                 | 5                   | DESeq,NOISeq,Students t-test,DESeq2,edgeR |
| hsa-miR-130b-5p                                | 4                   | DESeq,Students t-test,DESeq2,edgeR        |
| hsa-miR-323a-3p                                | 4                   | DESeq,Students t-test,DESeq2,edgeR        |

# Supplementary: INTEGRATIVE TRANSCRIPTOMIC PROFILING OF WILMS TUMOR

|                   |   |                              |
|-------------------|---|------------------------------|
| hsa-let-7c-5p     | 3 | Students t-test,DESeq2,edgeR |
| hsa-miR-1-3p      | 3 | NOISeq,DESeq2,edgeR          |
| hsa-miR-100-5p    | 3 | Students t-test,DESeq2,edgeR |
| hsa-miR-106b-3p   | 3 | Students t-test,DESeq2,edgeR |
| hsa-miR-125b-1-3p | 3 | Students t-test,DESeq2,edgeR |
| hsa-miR-125b-2-3p | 3 | Students t-test,DESeq2,edgeR |
| hsa-miR-125b-5p   | 3 | Students t-test,DESeq2,edgeR |
| hsa-miR-127-3p    | 3 | Students t-test,DESeq2,edgeR |
| hsa-miR-127-5p    | 3 | Students t-test,DESeq2,edgeR |
| hsa-miR-1287-5p   | 3 | Students t-test,DESeq2,edgeR |
| hsa-miR-130b-3p   | 3 | NOISeq,DESeq2,edgeR          |
| hsa-miR-132-3p    | 3 | Students t-test,DESeq2,edgeR |
| hsa-miR-133a-3p   | 3 | NOISeq,DESeq2,edgeR          |
| hsa-miR-133b      | 3 | NOISeq,DESeq2,edgeR          |
| hsa-miR-134-5p    | 3 | Students t-test,DESeq2,edgeR |
| hsa-miR-136-3p    | 3 | Students t-test,DESeq2,edgeR |
| hsa-miR-152-3p    | 3 | Students t-test,DESeq2,edgeR |
| hsa-miR-155-5p    | 3 | Students t-test,DESeq2,edgeR |
| hsa-miR-181a-2-3p | 3 | Students t-test,DESeq2,edgeR |
| hsa-miR-181a-3p   | 3 | Students t-test,DESeq2,edgeR |
| hsa-miR-181a-5p   | 3 | Students t-test,DESeq2,edgeR |
| hsa-miR-181b-5p   | 3 | Students t-test,DESeq2,edgeR |
| hsa-miR-181c-3p   | 3 | Students t-test,DESeq2,edgeR |
| hsa-miR-181c-5p   | 3 | Students t-test,DESeq2,edgeR |
| hsa-miR-181d-5p   | 3 | Students t-test,DESeq2,edgeR |
| hsa-miR-196b-5p   | 3 | Students t-test,DESeq2,edgeR |
| hsa-miR-199a-3p   | 3 | Students t-test,DESeq2,edgeR |
| hsa-miR-199a-5p   | 3 | Students t-test,DESeq2,edgeR |
| hsa-miR-199b-3p   | 3 | Students t-test,DESeq2,edgeR |
| hsa-miR-199b-5p   | 3 | Students t-test,DESeq2,edgeR |
| hsa-miR-206       | 3 | NOISeq,DESeq2,edgeR          |
| hsa-miR-214-3p    | 3 | Students t-test,DESeq2,edgeR |
| hsa-miR-214-5p    | 3 | Students t-test,DESeq2,edgeR |
| hsa-miR-218-5p    | 3 | Students t-test,DESeq2,edgeR |
| hsa-miR-25-3p     | 3 | Students t-test,DESeq2,edgeR |
| hsa-miR-331-5p    | 3 | Students t-test,DESeq2,edgeR |
| hsa-miR-335-3p    | 3 | Students t-test,DESeq2,edgeR |
| hsa-miR-335-5p    | 3 | Students t-test,DESeq2,edgeR |
| hsa-miR-340-3p    | 3 | Students t-test,DESeq2,edgeR |
| hsa-miR-340-5p    | 3 | Students t-test,DESeq2,edgeR |
| hsa-miR-34a-5p    | 3 | Students t-test,DESeq2,edgeR |
| hsa-miR-369-5p    | 3 | Students t-test,DESeq2,edgeR |
| hsa-miR-370-3p    | 3 | Students t-test,DESeq2,edgeR |
| hsa-miR-376c-3p   | 3 | Students t-test,DESeq2,edgeR |
| hsa-miR-379-5p    | 3 | Students t-test,DESeq2,edgeR |
| hsa-miR-381-3p    | 3 | NOISeq,DESeq2,edgeR          |
| hsa-miR-382-3p    | 3 | Students t-test,DESeq2,edgeR |
| hsa-miR-382-5p    | 3 | Students t-test,DESeq2,edgeR |
| hsa-miR-3913-5p   | 3 | Students t-test,DESeq2,edgeR |
| hsa-miR-409-3p    | 3 | Students t-test,DESeq2,edgeR |
| hsa-miR-409-5p    | 3 | Students t-test,DESeq2,edgeR |
| hsa-miR-411-5p    | 3 | Students t-test,DESeq2,edgeR |
| hsa-miR-421       | 3 | Students t-test,DESeq2,edgeR |
| hsa-miR-432-5p    | 3 | Students t-test,DESeq2,edgeR |
| hsa-miR-485-5p    | 3 | Students t-test,DESeq2,edgeR |
| hsa-miR-493-3p    | 3 | Students t-test,DESeq2,edgeR |
| hsa-miR-493-5p    | 3 | Students t-test,DESeq2,edgeR |
| hsa-miR-494-3p    | 3 | Students t-test,DESeq2,edgeR |
| hsa-miR-495-3p    | 3 | Students t-test,DESeq2,edgeR |
| hsa-miR-503-5p    | 3 | Students t-test,DESeq2,edgeR |
| hsa-miR-574-5p    | 3 | Students t-test,DESeq2,edgeR |
| hsa-miR-654-3p    | 3 | Students t-test,DESeq2,edgeR |
| hsa-miR-654-5p    | 3 | Students t-test,DESeq2,edgeR |
| hsa-miR-671-5p    | 3 | Students t-test,DESeq2,edgeR |
| hsa-miR-708-3p    | 3 | Students t-test,DESeq2,edgeR |
| hsa-miR-708-5p    | 3 | Students t-test,DESeq2,edgeR |
| hsa-miR-758-3p    | 3 | Students t-test,DESeq2,edgeR |
| hsa-miR-887-3p    | 3 | Students t-test,DESeq2,edgeR |
| hsa-miR-889-3p    | 3 | Students t-test,DESeq2,edgeR |
| hsa-miR-99a-5p    | 3 | Students t-test,DESeq2,edgeR |

## Supplementary: INTEGRATIVE TRANSCRIPTOMIC PROFILING OF WILMS TUMOR

|                |   |                              |
|----------------|---|------------------------------|
| hsa-miR-99b-3p | 3 | Students t-test,DESeq2,edgeR |
|----------------|---|------------------------------|

Supplementary Table S5: Differentially expressed miRNAs in FFT and FFPE HR, nHR and HK samples identified by at least three differential expression tools (sRNAde tool). Table 5Sa) shows decreased miRNA expression, and Table 4Sb) shows increased miRNA expression in compared sample groups (HR – High-Risk WT, nHR- non-High-Risk WT; HK – Healthy Kidney).

Table 5Sa) *Decreased expression*

### FFT HR vs nHR

| <i>name</i>  | <i>No. DE Tools</i> | <i>methods</i>      |
|--------------|---------------------|---------------------|
| hsa-miR-133b | 3                   | NOISeq,DESeq2,edgeR |

### FFT HR vs HK

| <i>name</i>     | <i>No. DE Tools</i> | <i>methods</i>                      |
|-----------------|---------------------|-------------------------------------|
| hsa-miR-141-3p  | 4                   | NOISeq,Students t-test,DESeq2,edgeR |
| hsa-miR-363-3p  | 3                   | Students t-test,DESeq2,edgeR        |
| hsa-miR-139-5p  | 3                   | Students t-test,DESeq2,edgeR        |
| hsa-miR-30a-3p  | 3                   | Students t-test,DESeq2,edgeR        |
| hsa-miR-200a-3p | 3                   | Students t-test,DESeq2,edgeR        |
| hsa-miR-200a-5p | 3                   | Students t-test,DESeq2,edgeR        |
| hsa-miR-29c-3p  | 3                   | Students t-test,DESeq2,edgeR        |
| hsa-miR-429     | 3                   | Students t-test,DESeq2,edgeR        |

### FFPE HR vs nHR

| <i>name</i>    | <i>No. DE Tools</i> | <i>methods</i>      |
|----------------|---------------------|---------------------|
| hsa-miR-379-5p | 3                   | NOISeq,DESeq2,edgeR |
| hsa-miR-1269a  | 3                   | NOISeq,DESeq2,edgeR |

### FFPE HR vs HK

| <i>name</i>      | <i>No. DE Tools</i> | <i>methods</i>                            |
|------------------|---------------------|-------------------------------------------|
| hsa-miR-200c-3p  | 5                   | DESeq,NOISeq,Students t-test,DESeq2,edgeR |
| hsa-miR-141-3p   | 5                   | DESeq,NOISeq,Students t-test,DESeq2,edgeR |
| hsa-miR-509-3-5p | 4                   | DESeq,NOISeq,DESeq2,edgeR                 |
| hsa-miR-139-5p   | 4                   | NOISeq,Students t-test,DESeq2,edgeR       |
| hsa-miR-216b-5p  | 4                   | DESeq,NOISeq,DESeq2,edgeR                 |
| hsa-miR-934      | 4                   | DESeq,NOISeq,DESeq2,edgeR                 |
| hsa-miR-200a-5p  | 4                   | NOISeq,Students t-test,DESeq2,edgeR       |
| hsa-miR-509-3p   | 4                   | DESeq,NOISeq,DESeq2,edgeR                 |
| hsa-miR-192-5p   | 4                   | DESeq,NOISeq,DESeq2,edgeR                 |
| hsa-miR-582-3p   | 4                   | NOISeq,Students t-test,DESeq2,edgeR       |
| hsa-miR-514a-5p  | 4                   | DESeq,NOISeq,DESeq2,edgeR                 |
| hsa-miR-455-5p   | 4                   | NOISeq,Students t-test,DESeq2,edgeR       |
| hsa-miR-217-5p   | 4                   | DESeq,NOISeq,DESeq2,edgeR                 |
| hsa-miR-509-5p   | 4                   | DESeq,NOISeq,DESeq2,edgeR                 |
| hsa-miR-141-5p   | 4                   | DESeq,Students t-test,DESeq2,edgeR        |
| hsa-miR-429      | 4                   | NOISeq,Students t-test,DESeq2,edgeR       |
| hsa-miR-514a-3p  | 4                   | DESeq,NOISeq,DESeq2,edgeR                 |
| hsa-miR-215-5p   | 4                   | DESeq,NOISeq,DESeq2,edgeR                 |
| hsa-miR-187-3p   | 4                   | DESeq,NOISeq,DESeq2,edgeR                 |
| hsa-miR-508-3p   | 4                   | DESeq,NOISeq,DESeq2,edgeR                 |
| hsa-miR-506-3p   | 3                   | NOISeq,DESeq2,edgeR                       |
| hsa-miR-455-3p   | 3                   | NOISeq,DESeq2,edgeR                       |
| hsa-miR-508-5p   | 3                   | NOISeq,DESeq2,edgeR                       |
| hsa-miR-5588-5p  | 3                   | Students t-test,DESeq2,edgeR              |
| hsa-miR-532-3p   | 3                   | NOISeq,DESeq2,edgeR                       |
| hsa-miR-514b-3p  | 3                   | DESeq,DESeq2,edgeR                        |
| hsa-miR-1307-5p  | 3                   | NOISeq,DESeq2,edgeR                       |
| hsa-miR-139-3p   | 3                   | NOISeq,DESeq2,edgeR                       |
| hsa-miR-378a-3p  | 3                   | NOISeq,DESeq2,edgeR                       |
| hsa-miR-204-5p   | 3                   | NOISeq,DESeq2,edgeR                       |
| hsa-miR-200b-3p  | 3                   | NOISeq,Students t-test,DESeq2             |
| hsa-miR-138-5p   | 3                   | NOISeq,DESeq2,edgeR                       |
| hsa-miR-200a-3p  | 3                   | NOISeq,Students t-test,edgeR              |
| hsa-miR-362-5p   | 3                   | NOISeq,DESeq2,edgeR                       |
| hsa-miR-532-5p   | 3                   | NOISeq,DESeq2,edgeR                       |
| hsa-miR-194-5p   | 3                   | NOISeq,DESeq2,edgeR                       |
| hsa-miR-190a-5p  | 3                   | NOISeq,DESeq2,edgeR                       |
| hsa-miR-378c     | 3                   | NOISeq,DESeq2,edgeR                       |
| hsa-miR-378d     | 3                   | NOISeq,DESeq2,edgeR                       |
| hsa-miR-653-5p   | 3                   | NOISeq,DESeq2,edgeR                       |
| hsa-miR-184      | 3                   | NOISeq,DESeq2,edgeR                       |
| hsa-miR-12135    | 3                   | NOISeq,DESeq2,edgeR                       |
| hsa-miR-12136    | 3                   | NOISeq,DESeq2,edgeR                       |
| hsa-miR-194-3p   | 3                   | NOISeq,DESeq2,edgeR                       |
| hsa-miR-502-3p   | 3                   | NOISeq,DESeq2,edgeR                       |
| hsa-miR-363-3p   | 3                   | NOISeq,DESeq2,edgeR                       |
| hsa-miR-9-5p     | 3                   | NOISeq,DESeq2,edgeR                       |
| hsa-miR-513a-5p  | 3                   | DESeq,DESeq2,edgeR                        |
| hsa-miR-500a-3p  | 3                   | NOISeq,DESeq2,edgeR                       |
| hsa-miR-22-3p    | 3                   | NOISeq,DESeq2,edgeR                       |
| hsa-miR-514b-5p  | 3                   | DESeq,DESeq2,edgeR                        |
| hsa-miR-203a-3p  | 3                   | NOISeq,DESeq2,edgeR                       |

# Supplementary: INTEGRATIVE TRANSCRIPTOMIC PROFILING OF WILMS TUMOR

## FFT nHR vs HK

| <i>name</i>      | <i>No. DE Tools</i> | <i>methods</i>                            |
|------------------|---------------------|-------------------------------------------|
| hsa-miR-509-3-5p | 5                   | DESeq,NOISeq,Students t-test,DESeq2,edgeR |
| hsa-miR-192-5p   | 5                   | DESeq,NOISeq,Students t-test,DESeq2,edgeR |
| hsa-miR-204-5p   | 5                   | DESeq,NOISeq,Students t-test,DESeq2,edgeR |
| hsa-miR-138-5p   | 5                   | DESeq,NOISeq,Students t-test,DESeq2,edgeR |
| hsa-miR-194-5p   | 5                   | DESeq,NOISeq,Students t-test,DESeq2,edgeR |
| hsa-miR-514a-3p  | 5                   | DESeq,NOISeq,Students t-test,DESeq2,edgeR |
| hsa-miR-12135    | 5                   | DESeq,NOISeq,Students t-test,DESeq2,edgeR |
| hsa-miR-215-5p   | 5                   | DESeq,NOISeq,Students t-test,DESeq2,edgeR |
| hsa-miR-187-3p   | 5                   | DESeq,NOISeq,Students t-test,DESeq2,edgeR |
| hsa-miR-508-3p   | 5                   | DESeq,NOISeq,Students t-test,DESeq2,edgeR |
| hsa-miR-30a-5p   | 5                   | DESeq,NOISeq,Students t-test,DESeq2,edgeR |
| hsa-miR-200a-3p  | 4                   | NOISeq,Students t-test,DESeq2,edgeR       |
| hsa-miR-190a-5p  | 4                   | NOISeq,Students t-test,DESeq2,edgeR       |
| hsa-miR-429      | 4                   | NOISeq,Students t-test,DESeq2,edgeR       |
| hsa-miR-184      | 4                   | NOISeq,Students t-test,DESeq2,edgeR       |
| hsa-miR-12136    | 4                   | NOISeq,Students t-test,DESeq2,edgeR       |
| hsa-miR-29c-3p   | 4                   | NOISeq,Students t-test,DESeq2,edgeR       |
| hsa-miR-139-5p   | 3                   | Students t-test,DESeq2,edgeR              |
| hsa-miR-30c-5p   | 3                   | Students t-test,DESeq2,edgeR              |
| hsa-miR-30a-3p   | 3                   | Students t-test,DESeq2,edgeR              |
| hsa-miR-9985     | 3                   | Students t-test,DESeq2,edgeR              |
| hsa-miR-200a-5p  | 3                   | Students t-test,DESeq2,edgeR              |
| hsa-miR-30c-2-3p | 3                   | Students t-test,DESeq2,edgeR              |
| hsa-miR-1307-5p  | 3                   | Students t-test,DESeq2,edgeR              |
| hsa-miR-29c-5p   | 3                   | Students t-test,DESeq2,edgeR              |
| hsa-miR-378a-3p  | 3                   | Students t-test,DESeq2,edgeR              |
| hsa-miR-30d-3p   | 3                   | Students t-test,DESeq2,edgeR              |
| hsa-miR-29a-3p   | 3                   | Students t-test,DESeq2,edgeR              |
| hsa-miR-200b-3p  | 3                   | Students t-test,DESeq2,edgeR              |
| hsa-miR-6765-3p  | 3                   | Students t-test,DESeq2,edgeR              |
| hsa-miR-422a     | 3                   | Students t-test,DESeq2,edgeR              |
| hsa-miR-455-5p   | 3                   | Students t-test,DESeq2,edgeR              |
| hsa-miR-30e-5p   | 3                   | Students t-test,DESeq2,edgeR              |
| hsa-miR-144-5p   | 3                   | Students t-test,DESeq2,edgeR              |
| hsa-miR-378c     | 3                   | Students t-test,DESeq2,edgeR              |
| hsa-miR-378d     | 3                   | Students t-test,DESeq2,edgeR              |
| hsa-miR-378e     | 3                   | Students t-test,DESeq2,edgeR              |
| hsa-miR-653-5p   | 3                   | Students t-test,DESeq2,edgeR              |
| hsa-miR-27b-3p   | 3                   | Students t-test,DESeq2,edgeR              |
| hsa-miR-29a-5p   | 3                   | Students t-test,DESeq2,edgeR              |
| hsa-miR-101-3p   | 3                   | Students t-test,DESeq2,edgeR              |
| hsa-miR-378f     | 3                   | Students t-test,DESeq2,edgeR              |
| hsa-miR-378g     | 3                   | Students t-test,DESeq2,edgeR              |
| hsa-miR-378i     | 3                   | Students t-test,DESeq2,edgeR              |
| hsa-miR-29b-3p   | 3                   | Students t-test,DESeq2,edgeR              |
| hsa-miR-24-1-5p  | 3                   | Students t-test,DESeq2,edgeR              |
| hsa-miR-200c-3p  | 3                   | Students t-test,DESeq2,edgeR              |
| hsa-miR-144-3p   | 3                   | Students t-test,DESeq2,edgeR              |
| hsa-miR-22-5p    | 3                   | Students t-test,DESeq2,edgeR              |
| hsa-miR-30b-5p   | 3                   | Students t-test,DESeq2,edgeR              |
| hsa-miR-141-3p   | 3                   | Students t-test,DESeq2,edgeR              |
| hsa-miR-29b-2-5p | 3                   | Students t-test,DESeq2,edgeR              |
| hsa-miR-126-5p   | 3                   | Students t-test,DESeq2,edgeR              |
| hsa-miR-363-3p   | 3                   | Students t-test,DESeq2,edgeR              |
| hsa-miR-140-5p   | 3                   | Students t-test,DESeq2,edgeR              |
| hsa-miR-338-3p   | 3                   | Students t-test,DESeq2,edgeR              |
| hsa-miR-126-3p   | 3                   | Students t-test,DESeq2,edgeR              |

## FFPE nHR vs HK

| <i>name</i>      | <i>No. DE Tools</i> | <i>methods</i>                            |
|------------------|---------------------|-------------------------------------------|
| hsa-miR-509-3-5p | 5                   | DESeq,NOISeq,Students t-test,DESeq2,edgeR |
| hsa-miR-139-5p   | 5                   | DESeq,NOISeq,Students t-test,DESeq2,edgeR |
| hsa-miR-216b-5p  | 5                   | DESeq,NOISeq,Students t-test,DESeq2,edgeR |
| hsa-miR-509-3p   | 5                   | DESeq,NOISeq,Students t-test,DESeq2,edgeR |
| hsa-miR-30c-2-3p | 5                   | DESeq,NOISeq,Students t-test,DESeq2,edgeR |
| hsa-miR-514b-3p  | 5                   | DESeq,NOISeq,Students t-test,DESeq2,edgeR |
| hsa-miR-192-5p   | 5                   | DESeq,NOISeq,Students t-test,DESeq2,edgeR |
| hsa-miR-204-5p   | 5                   | DESeq,NOISeq,Students t-test,DESeq2,edgeR |
| hsa-miR-514a-5p  | 5                   | DESeq,NOISeq,Students t-test,DESeq2,edgeR |
| hsa-miR-138-5p   | 5                   | DESeq,NOISeq,Students t-test,DESeq2,edgeR |
| hsa-miR-217-5p   | 5                   | DESeq,NOISeq,Students t-test,DESeq2,edgeR |
| hsa-miR-509-5p   | 5                   | DESeq,NOISeq,Students t-test,DESeq2,edgeR |
| hsa-miR-194-5p   | 5                   | DESeq,NOISeq,Students t-test,DESeq2,edgeR |
| hsa-miR-190a-5p  | 5                   | DESeq,NOISeq,Students t-test,DESeq2,edgeR |
| hsa-miR-514a-3p  | 5                   | DESeq,NOISeq,Students t-test,DESeq2,edgeR |
| hsa-miR-184      | 5                   | DESeq,NOISeq,Students t-test,DESeq2,edgeR |
| hsa-miR-12135    | 5                   | DESeq,NOISeq,Students t-test,DESeq2,edgeR |
| hsa-miR-29b-3p   | 5                   | DESeq,NOISeq,Students t-test,DESeq2,edgeR |
| hsa-miR-129-5p   | 5                   | DESeq,NOISeq,Students t-test,DESeq2,edgeR |
| hsa-miR-194-3p   | 5                   | DESeq,NOISeq,Students t-test,DESeq2,edgeR |
| hsa-miR-141-3p   | 5                   | DESeq,NOISeq,Students t-test,DESeq2,edgeR |
| hsa-miR-187-3p   | 5                   | DESeq,NOISeq,Students t-test,DESeq2,edgeR |
| hsa-miR-508-3p   | 5                   | DESeq,NOISeq,Students t-test,DESeq2,edgeR |
| hsa-miR-9-5p     | 5                   | DESeq,NOISeq,Students t-test,DESeq2,edgeR |
| hsa-miR-30a-5p   | 5                   | DESeq,NOISeq,Students t-test,DESeq2,edgeR |
| hsa-miR-203a-3p  | 5                   | DESeq,NOISeq,Students t-test,DESeq2,edgeR |
| hsa-miR-29c-3p   | 5                   | DESeq,NOISeq,Students t-test,DESeq2,edgeR |
| hsa-miR-506-3p   | 4                   | DESeq,NOISeq,DESeq2,edgeR                 |
| hsa-miR-892a     | 4                   | DESeq,Students t-test,DESeq2,edgeR        |
| hsa-miR-508-5p   | 4                   | DESeq,NOISeq,DESeq2,edgeR                 |
| hsa-miR-30c-5p   | 4                   | NOISeq,Students t-test,DESeq2,edgeR       |
| hsa-miR-30a-3p   | 4                   | NOISeq,Students t-test,DESeq2,edgeR       |
| hsa-miR-934      | 4                   | DESeq,NOISeq,DESeq2,edgeR                 |
| hsa-miR-200a-5p  | 4                   | NOISeq,Students t-test,DESeq2,edgeR       |
| hsa-miR-139-3p   | 4                   | NOISeq,Students t-test,DESeq2,edgeR       |
| hsa-miR-378a-3p  | 4                   | NOISeq,Students t-test,DESeq2,edgeR       |
| hsa-miR-29c-5p   | 4                   | NOISeq,Students t-test,DESeq2,edgeR       |
| hsa-miR-29a-3p   | 4                   | NOISeq,Students t-test,DESeq2,edgeR       |
| hsa-miR-200b-3p  | 4                   | NOISeq,Students t-test,DESeq2,edgeR       |
| hsa-miR-200a-3p  | 4                   | DESeq,NOISeq,Students t-test,edgeR        |
| hsa-miR-378c     | 4                   | NOISeq,Students t-test,DESeq2,edgeR       |
| hsa-miR-141-5p   | 4                   | DESeq,Students t-test,DESeq2,edgeR        |
| hsa-miR-429      | 4                   | NOISeq,Students t-test,DESeq2,edgeR       |
| hsa-miR-510-5p   | 4                   | DESeq,Students t-test,DESeq2,edgeR        |
| hsa-miR-200c-3p  | 4                   | NOISeq,Students t-test,DESeq2,edgeR       |
| hsa-miR-22-5p    | 4                   | NOISeq,Students t-test,DESeq2,edgeR       |
| hsa-miR-30b-5p   | 4                   | NOISeq,Students t-test,DESeq2,edgeR       |
| hsa-miR-891a-5p  | 4                   | DESeq,Students t-test,DESeq2,edgeR        |
| hsa-miR-22-3p    | 4                   | NOISeq,Students t-test,DESeq2,edgeR       |
| hsa-miR-514b-5p  | 4                   | DESeq,Students t-test,DESeq2,edgeR        |
| hsa-miR-216a-3p  | 4                   | DESeq,Students t-test,DESeq2,edgeR        |
| hsa-miR-561-5p   | 4                   | DESeq,Students t-test,DESeq2,edgeR        |
| hsa-miR-193a-3p  | 3                   | Students t-test,DESeq2,edgeR              |
| hsa-miR-5588-5p  | 3                   | Students t-test,DESeq2,edgeR              |
| hsa-miR-29b-1-5p | 3                   | Students t-test,DESeq2,edgeR              |
| hsa-miR-30d-3p   | 3                   | Students t-test,DESeq2,edgeR              |
| hsa-miR-455-5p   | 3                   | Students t-test,DESeq2,edgeR              |
| hsa-miR-422a     | 3                   | Students t-test,DESeq2,edgeR              |
| hsa-miR-362-5p   | 3                   | NOISeq,DESeq2,edgeR                       |
| hsa-miR-888-5p   | 3                   | Students t-test,DESeq2,edgeR              |
| hsa-miR-532-5p   | 3                   | Students t-test,DESeq2,edgeR              |
| hsa-miR-378d     | 3                   | NOISeq,DESeq2,edgeR                       |
| hsa-miR-192-3p   | 3                   | DESeq,DESeq2,edgeR                        |
| hsa-miR-378e     | 3                   | Students t-test,DESeq2,edgeR              |
| hsa-miR-378a-5p  | 3                   | Students t-test,DESeq2,edgeR              |
| hsa-miR-101-3p   | 3                   | Students t-test,DESeq2,edgeR              |
| hsa-miR-12136    | 3                   | NOISeq,DESeq2,edgeR                       |
| hsa-miR-378f     | 3                   | Students t-test,DESeq2,edgeR              |
| hsa-miR-378g     | 3                   | Students t-test,DESeq2,edgeR              |
| hsa-miR-378h     | 3                   | Students t-test,DESeq2,edgeR              |
| hsa-miR-378i     | 3                   | Students t-test,DESeq2,edgeR              |
| hsa-miR-6500-3p  | 3                   | Students t-test,DESeq2,edgeR              |
| hsa-miR-215-5p   | 3                   | NOISeq,DESeq2,edgeR                       |
| hsa-miR-216a-5p  | 3                   | Students t-test,DESeq2,edgeR              |

Supplementary:

INTEGRATIVE TRANSCRIPTOMIC PROFILING OF WILMS TUMOR

|                 |   |                              |
|-----------------|---|------------------------------|
| hsa-miR-126-5p  | 3 | Students t-test,DESeq2,edgeR |
| hsa-miR-23a-5p  | 3 | Students t-test,DESeq2,edgeR |
| hsa-miR-513a-5p | 3 | DESeq,DESeq2,edgeR           |
| hsa-miR-30d-5p  | 3 | Students t-test,DESeq2,edgeR |
| hsa-miR-200b-5p | 3 | Students t-test,DESeq2,edgeR |
| hsa-miR-126-3p  | 3 | Students t-test,DESeq2,edgeR |

Table 5Sb) *Increased expression*

*FFT HR vs nHR*

| <i>name</i>  | <i>No. DE Tools</i> | <i>methods</i>     |
|--------------|---------------------|--------------------|
| hsa-miR-892a | 3                   | DESeq,DESeq2,edgeR |

*FFPE HR vs nHR*

| <i>name</i>      | <i>No. DE Tools</i> | <i>methods</i>            |
|------------------|---------------------|---------------------------|
| hsa-miR-514a-3p  | 4                   | DESeq,NOISeq,DESeq2,edgeR |
| hsa-miR-508-3p   | 4                   | DESeq,NOISeq,DESeq2,edgeR |
| hsa-miR-192-5p   | 3                   | DESeq,NOISeq,edgeR        |
| hsa-miR-509-3-5p | 3                   | DESeq,NOISeq,edgeR        |

*FFT HR vs HK*

| <i>name</i>       | <i>No. DE Tools</i> | <i>methods</i>                     |
|-------------------|---------------------|------------------------------------|
| hsa-miR-93-5p     | 4                   | DESeq,NOISeq,DESeq2,edgeR          |
| hsa-miR-301b-3p   | 4                   | DESeq,NOISeq,DESeq2,edgeR          |
| hsa-miR-3085-3p   | 4                   | DESeq,Students t-test,DESeq2,edgeR |
| hsa-miR-516a-5p   | 4                   | DESeq,Students t-test,DESeq2,edgeR |
| hsa-miR-135a-3p   | 4                   | DESeq,NOISeq,DESeq2,edgeR          |
| hsa-miR-149-5p    | 4                   | DESeq,NOISeq,DESeq2,edgeR          |
| hsa-miR-1238-3p   | 4                   | DESeq,Students t-test,DESeq2,edgeR |
| hsa-miR-106b-3p   | 4                   | DESeq,NOISeq,DESeq2,edgeR          |
| hsa-miR-6788-3p   | 3                   | Students t-test,DESeq2,edgeR       |
| hsa-miR-6868-3p   | 3                   | NOISeq,DESeq2,edgeR                |
| hsa-miR-181a-2-3p | 3                   | Students t-test,DESeq2,edgeR       |
| hsa-miR-20a-3p    | 3                   | Students t-test,DESeq2,edgeR       |
| hsa-miR-6759-5p   | 3                   | Students t-test,DESeq2,edgeR       |
| hsa-miR-17-5p     | 3                   | NOISeq,DESeq2,edgeR                |
| hsa-miR-196a-3p   | 3                   | NOISeq,DESeq2,edgeR                |
| hsa-miR-183-5p    | 3                   | NOISeq,DESeq2,edgeR                |
| hsa-miR-877-5p    | 3                   | NOISeq,DESeq2,edgeR                |
| hsa-miR-4498      | 3                   | DESeq,DESeq2,edgeR                 |
| hsa-miR-483-3p    | 3                   | NOISeq,DESeq2,edgeR                |
| hsa-miR-196a-5p   | 3                   | NOISeq,DESeq2,edgeR                |
| hsa-miR-135a-5p   | 3                   | NOISeq,DESeq2,edgeR                |
| hsa-miR-873-3p    | 3                   | DESeq,DESeq2,edgeR                 |
| hsa-miR-96-5p     | 3                   | NOISeq,DESeq2,edgeR                |
| hsa-miR-128-3p    | 3                   | NOISeq,DESeq2,edgeR                |
| hsa-miR-6818-5p   | 3                   | DESeq,DESeq2,edgeR                 |
| hsa-miR-490-3p    | 3                   | DESeq,DESeq2,edgeR                 |
| hsa-miR-18a-5p    | 3                   | DESeq,DESeq2,edgeR                 |
| hsa-miR-1197      | 3                   | DESeq,DESeq2,edgeR                 |
| hsa-miR-873-5p    | 3                   | DESeq,DESeq2,edgeR                 |
| hsa-miR-3059-5p   | 3                   | DESeq,DESeq2,edgeR                 |
| hsa-miR-483-5p    | 3                   | NOISeq,DESeq2,edgeR                |
| hsa-miR-153-3p    | 3                   | Students t-test,DESeq2,edgeR       |
| hsa-miR-342-3p    | 3                   | NOISeq,DESeq2,edgeR                |
| hsa-miR-6516-5p   | 3                   | NOISeq,DESeq2,edgeR                |
| hsa-miR-708-3p    | 3                   | Students t-test,DESeq2,edgeR       |
| hsa-miR-182-3p    | 3                   | NOISeq,DESeq2,edgeR                |
| hsa-miR-206       | 3                   | NOISeq,DESeq2,edgeR                |
| hsa-miR-323b-3p   | 3                   | NOISeq,DESeq2,edgeR                |
| hsa-miR-424-3p    | 3                   | NOISeq,DESeq2,edgeR                |

*FFPE HR vs HK*

| <i>name</i>       | <i>No. DE Tools</i> | <i>methods</i>                            |
|-------------------|---------------------|-------------------------------------------|
| hsa-miR-483-3p    | 5                   | DESeq,NOISeq,Students t-test,DESeq2,edgeR |
| hsa-miR-483-5p    | 5                   | DESeq,NOISeq,Students t-test,DESeq2,edgeR |
| hsa-miR-130b-3p   | 4                   | NOISeq,Students t-test,DESeq2,edgeR       |
| hsa-miR-873-5p    | 4                   | NOISeq,Students t-test,DESeq2,edgeR       |
| hsa-miR-1269a     | 4                   | NOISeq,Students t-test,DESeq2,edgeR       |
| hsa-miR-199b-3p   | 3                   | Students t-test,DESeq2,edgeR              |
| hsa-miR-214-3p    | 3                   | Students t-test,DESeq2,edgeR              |
| hsa-miR-301a-3p   | 3                   | Students t-test,DESeq2,edgeR              |
| hsa-miR-671-5p    | 3                   | Students t-test,DESeq2,edgeR              |
| hsa-miR-147b-3p   | 3                   | Students t-test,DESeq2,edgeR              |
| hsa-miR-4677-3p   | 3                   | Students t-test,DESeq2,edgeR              |
| hsa-miR-708-3p    | 3                   | Students t-test,DESeq2,edgeR              |
| hsa-miR-196b-5p   | 3                   | Students t-test,DESeq2,edgeR              |
| hsa-miR-370-3p    | 3                   | Students t-test,DESeq2,edgeR              |
| hsa-miR-199a-3p   | 3                   | Students t-test,DESeq2,edgeR              |
| hsa-miR-106b-5p   | 3                   | Students t-test,DESeq2,edgeR              |
| hsa-miR-382-5p    | 3                   | Students t-test,DESeq2,edgeR              |
| hsa-miR-493-3p    | 3                   | Students t-test,DESeq2,edgeR              |
| hsa-miR-218-5p    | 3                   | Students t-test,DESeq2,edgeR              |
| hsa-miR-1278      | 3                   | Students t-test,DESeq2,edgeR              |
| hsa-miR-214-5p    | 3                   | Students t-test,DESeq2,edgeR              |
| hsa-miR-181b-5p   | 3                   | Students t-test,DESeq2,edgeR              |
| hsa-miR-548ay-5p  | 3                   | Students t-test,DESeq2,edgeR              |
| hsa-miR-130b-5p   | 3                   | Students t-test,DESeq2,edgeR              |
| hsa-miR-432-5p    | 3                   | Students t-test,DESeq2,edgeR              |
| hsa-miR-125b-1-3p | 3                   | Students t-test,DESeq2,edgeR              |
| hsa-miR-632       | 3                   | Students t-test,DESeq2,edgeR              |
| hsa-miR-628-5p    | 3                   | Students t-test,DESeq2,edgeR              |
| hsa-miR-708-5p    | 3                   | Students t-test,DESeq2,edgeR              |
| hsa-miR-758-3p    | 3                   | Students t-test,DESeq2,edgeR              |
| hsa-miR-135b-3p   | 3                   | Students t-test,DESeq2,edgeR              |
| hsa-miR-18a-3p    | 3                   | Students t-test,DESeq2,edgeR              |
| hsa-miR-181a-3p   | 3                   | Students t-test,DESeq2,edgeR              |
| hsa-miR-199a-5p   | 3                   | Students t-test,DESeq2,edgeR              |
| hsa-miR-3912-3p   | 3                   | Students t-test,DESeq2,edgeR              |
| hsa-miR-665       | 3                   | Students t-test,DESeq2,edgeR              |

## Supplementary: INTEGRATIVE TRANSCRIPTOMIC PROFILING OF WILMS TUMOR

|                 |   |                              |
|-----------------|---|------------------------------|
| hsa-miR-199b-5p | 3 | NOISeq,DESeq2,edgeR          |
| hsa-miR-7706    | 3 | NOISeq,DESeq2,edgeR          |
| hsa-miR-130b-5p | 3 | NOISeq,DESeq2,edgeR          |
| hsa-miR-490-5p  | 3 | DESeq,DESeq2,edgeR           |
| hsa-miR-182-5p  | 3 | NOISeq,DESeq2,edgeR          |
| hsa-miR-1843    | 3 | NOISeq,DESeq2,edgeR          |
| hsa-miR-4673    | 3 | Students t-test,DESeq2,edgeR |
| hsa-miR-3118    | 3 | DESeq,DESeq2,edgeR           |
| hsa-miR-1226-3p | 3 | NOISeq,DESeq2,edgeR          |

### FFT nHR vs HK

| <i>name</i>       | <i>No. DE Tools</i> | <i>methods</i>                            |
|-------------------|---------------------|-------------------------------------------|
| hsa-miR-135a-3p   | 5                   | DESeq,NOISeq,Students t-test,DESeq2,edgeR |
| hsa-miR-490-3p    | 5                   | DESeq,NOISeq,Students t-test,DESeq2,edgeR |
| hsa-miR-873-5p    | 5                   | DESeq,NOISeq,Students t-test,DESeq2,edgeR |
| hsa-miR-323a-3p   | 5                   | DESeq,NOISeq,Students t-test,DESeq2,edgeR |
| hsa-miR-199b-5p   | 5                   | DESeq,NOISeq,Students t-test,DESeq2,edgeR |
| hsa-miR-335-3p    | 5                   | DESeq,NOISeq,Students t-test,DESeq2,edgeR |
| hsa-miR-876-3p    | 4                   | DESeq,Students t-test,DESeq2,edgeR        |
| hsa-miR-301b-3p   | 4                   | DESeq,NOISeq,DESeq2,edgeR                 |
| hsa-miR-181b-3p   | 4                   | DESeq,Students t-test,DESeq2,edgeR        |
| hsa-miR-1269a     | 4                   | DESeq,NOISeq,DESeq2,edgeR                 |
| hsa-miR-873-3p    | 4                   | DESeq,NOISeq,DESeq2,edgeR                 |
| hsa-miR-6818-5p   | 4                   | DESeq,Students t-test,DESeq2,edgeR        |
| hsa-miR-18a-5p    | 4                   | DESeq,Students t-test,DESeq2,edgeR        |
| hsa-miR-1197      | 4                   | DESeq,Students t-test,DESeq2,edgeR        |
| hsa-miR-130b-3p   | 4                   | DESeq,NOISeq,DESeq2,edgeR                 |
| hsa-miR-1276      | 4                   | DESeq,Students t-test,DESeq2,edgeR        |
| hsa-miR-130b-5p   | 4                   | DESeq,NOISeq,DESeq2,edgeR                 |
| hsa-miR-490-5p    | 4                   | DESeq,Students t-test,DESeq2,edgeR        |
| hsa-miR-548l      | 3                   | Students t-test,DESeq2,edgeR              |
| hsa-miR-3622a-5p  | 3                   | Students t-test,DESeq2,edgeR              |
| hsa-miR-744-3p    | 3                   | Students t-test,DESeq2,edgeR              |
| hsa-miR-6735-5p   | 3                   | Students t-test,DESeq2,edgeR              |
| hsa-miR-876-5p    | 3                   | Students t-test,DESeq2,edgeR              |
| hsa-miR-376c-5p   | 3                   | Students t-test,DESeq2,edgeR              |
| hsa-miR-493-3p    | 3                   | Students t-test,DESeq2,edgeR              |
| hsa-miR-181a-2-3p | 3                   | Students t-test,DESeq2,edgeR              |
| hsa-miR-301a-5p   | 3                   | Students t-test,DESeq2,edgeR              |
| hsa-miR-1304-5p   | 3                   | Students t-test,DESeq2,edgeR              |
| hsa-miR-17-5p     | 3                   | Students t-test,DESeq2,edgeR              |
| hsa-miR-181a-3p   | 3                   | NOISeq,DESeq2,edgeR                       |
| hsa-miR-3912-3p   | 3                   | Students t-test,DESeq2,edgeR              |
| hsa-miR-4659a-3p  | 3                   | Students t-test,DESeq2,edgeR              |
| hsa-miR-6505-5p   | 3                   | Students t-test,DESeq2,edgeR              |
| hsa-miR-183-5p    | 3                   | NOISeq,DESeq2,edgeR                       |
| hsa-miR-1247-3p   | 3                   | Students t-test,DESeq2,edgeR              |
| hsa-miR-877-5p    | 3                   | Students t-test,DESeq2,edgeR              |
| hsa-let-7a-2-3p   | 3                   | Students t-test,DESeq2,edgeR              |
| hsa-miR-597-3p    | 3                   | Students t-test,DESeq2,edgeR              |
| hsa-miR-494-3p    | 3                   | Students t-test,DESeq2,edgeR              |
| hsa-miR-4498      | 3                   | DESeq,DESeq2,edgeR                        |
| hsa-miR-1302      | 3                   | Students t-test,DESeq2,edgeR              |
| hsa-miR-3064-5p   | 3                   | Students t-test,DESeq2,edgeR              |
| hsa-miR-199a-3p   | 3                   | Students t-test,DESeq2,edgeR              |
| hsa-miR-431-3p    | 3                   | NOISeq,DESeq2,edgeR                       |
| hsa-miR-1185-1-3p | 3                   | Students t-test,DESeq2,edgeR              |
| hsa-miR-382-5p    | 3                   | Students t-test,DESeq2,edgeR              |
| hsa-miR-483-3p    | 3                   | NOISeq,DESeq2,edgeR                       |
| hsa-miR-196a-5p   | 3                   | NOISeq,DESeq2,edgeR                       |
| hsa-miR-3174      | 3                   | Students t-test,DESeq2,edgeR              |

### FFPE nHR vs HK

| <i>name</i>       | <i>No. DE Tools</i> | <i>methods</i>                            |
|-------------------|---------------------|-------------------------------------------|
| hsa-miR-873-5p    | 5                   | DESeq,NOISeq,Students t-test,DESeq2,edgeR |
| hsa-miR-483-5p    | 5                   | DESeq,NOISeq,Students t-test,DESeq2,edgeR |
| hsa-miR-483-3p    | 5                   | DESeq,NOISeq,Students t-test,DESeq2,edgeR |
| hsa-miR-323a-3p   | 5                   | DESeq,NOISeq,Students t-test,DESeq2,edgeR |
| hsa-miR-1269a     | 5                   | DESeq,NOISeq,Students t-test,DESeq2,edgeR |
| hsa-miR-433-3p    | 4                   | DESeq,Students t-test,DESeq2,edgeR        |
| hsa-miR-199b-5p   | 4                   | NOISeq,Students t-test,DESeq2,edgeR       |
| hsa-miR-199b-3p   | 3                   | Students t-test,DESeq2,edgeR              |
| hsa-miR-3913-5p   | 3                   | Students t-test,DESeq2,edgeR              |
| hsa-miR-340-5p    | 3                   | Students t-test,DESeq2,edgeR              |
| hsa-miR-214-3p    | 3                   | Students t-test,DESeq2,edgeR              |
| hsa-miR-133b      | 3                   | NOISeq,DESeq2,edgeR                       |
| hsa-miR-331-5p    | 3                   | Students t-test,DESeq2,edgeR              |
| hsa-miR-337-3p    | 3                   | Students t-test,DESeq2,edgeR              |
| hsa-miR-381-3p    | 3                   | NOISeq,DESeq2,edgeR                       |
| hsa-miR-196b-5p   | 3                   | Students t-test,DESeq2,edgeR              |
| hsa-miR-127-5p    | 3                   | Students t-test,DESeq2,edgeR              |
| hsa-miR-370-3p    | 3                   | Students t-test,DESeq2,edgeR              |
| hsa-miR-152-3p    | 3                   | Students t-test,DESeq2,edgeR              |
| hsa-miR-181 c-3p  | 3                   | Students t-test,DESeq2,edgeR              |
| hsa-miR-99a-5p    | 3                   | Students t-test,DESeq2,edgeR              |
| hsa-miR-503-5p    | 3                   | Students t-test,DESeq2,edgeR              |
| hsa-let-7c-5p     | 3                   | Students t-test,DESeq2,edgeR              |
| hsa-miR-125b-2-3p | 3                   | Students t-test,DESeq2,edgeR              |
| hsa-miR-154-5p    | 3                   | Students t-test,DESeq2,edgeR              |
| hsa-miR-125b-5p   | 3                   | Students t-test,DESeq2,edgeR              |
| hsa-miR-329-3p    | 3                   | Students t-test,DESeq2,edgeR              |
| hsa-miR-493-3p    | 3                   | Students t-test,DESeq2,edgeR              |
| hsa-miR-181a-2-3p | 3                   | Students t-test,DESeq2,edgeR              |
| hsa-miR-369-5p    | 3                   | Students t-test,DESeq2,edgeR              |
| hsa-miR-214-5p    | 3                   | Students t-test,DESeq2,edgeR              |
| hsa-miR-487b-3p   | 3                   | Students t-test,DESeq2,edgeR              |
| hsa-miR-495-3p    | 3                   | Students t-test,DESeq2,edgeR              |
| hsa-miR-432-5p    | 3                   | Students t-test,DESeq2,edgeR              |
| hsa-miR-136-3p    | 3                   | Students t-test,DESeq2,edgeR              |
| hsa-miR-758-3p    | 3                   | Students t-test,DESeq2,edgeR              |
| hsa-miR-93-3p     | 3                   | Students t-test,DESeq2,edgeR              |
| hsa-miR-574-5p    | 3                   | Students t-test,DESeq2,edgeR              |
| hsa-miR-299-5p    | 3                   | Students t-test,DESeq2,edgeR              |
| hsa-miR-4510      | 3                   | Students t-test,DESeq2,edgeR              |
| hsa-miR-181a-3p   | 3                   | Students t-test,DESeq2,edgeR              |
| hsa-miR-127-3p    | 3                   | Students t-test,DESeq2,edgeR              |
| hsa-miR-199a-5p   | 3                   | Students t-test,DESeq2,edgeR              |
| hsa-miR-181 c-5p  | 3                   | Students t-test,DESeq2,edgeR              |
| hsa-miR-3912-3p   | 3                   | Students t-test,DESeq2,edgeR              |
| hsa-miR-769-5p    | 3                   | Students t-test,DESeq2,edgeR              |
| hsa-miR-665       | 3                   | Students t-test,DESeq2,edgeR              |
| hsa-miR-382-3p    | 3                   | Students t-test,DESeq2,edgeR              |
| hsa-miR-181d-5p   | 3                   | Students t-test,DESeq2,edgeR              |

## Supplementary:

# INTEGRATIVE TRANSCRIPTOMIC PROFILING OF WILMS TUMOR

|                   |   |                              |
|-------------------|---|------------------------------|
| hsa-miR-409-5p    | 3 | Students t-test,DESeq2,edgeR |
| hsa-miR-181b-5p   | 3 | NOISeq,DESeq2,edgeR          |
| hsa-miR-6877-5p   | 3 | Students t-test,DESeq2,edgeR |
| hsa-miR-15b-3p    | 3 | Students t-test,DESeq2,edgeR |
| hsa-miR-205-5p    | 3 | Students t-test,DESeq2,edgeR |
| hsa-miR-431-5p    | 3 | NOISeq,DESeq2,edgeR          |
| hsa-miR-4286      | 3 | Students t-test,DESeq2,edgeR |
| hsa-miR-96-5p     | 3 | NOISeq,DESeq2,edgeR          |
| hsa-miR-199b-3p   | 3 | Students t-test,DESeq2,edgeR |
| hsa-miR-1185-2-3p | 3 | Students t-test,DESeq2,edgeR |
| hsa-miR-196b-5p   | 3 | Students t-test,DESeq2,edgeR |
| hsa-miR-454-5p    | 3 | Students t-test,DESeq2,edgeR |
| hsa-miR-376a-3p   | 3 | Students t-test,DESeq2,edgeR |
| hsa-miR-6807-5p   | 3 | Students t-test,DESeq2,edgeR |
| hsa-miR-329-3p    | 3 | Students t-test,DESeq2,edgeR |
| hsa-miR-1228-3p   | 3 | Students t-test,DESeq2,edgeR |
| hsa-miR-6721-5p   | 3 | Students t-test,DESeq2,edgeR |
| hsa-miR-6514-5p   | 3 | Students t-test,DESeq2,edgeR |
| hsa-miR-4470      | 3 | Students t-test,DESeq2,edgeR |
| hsa-miR-758-3p    | 3 | Students t-test,DESeq2,edgeR |
| hsa-miR-127-3p    | 3 | Students t-test,DESeq2,edgeR |
| hsa-miR-370-5p    | 3 | Students t-test,DESeq2,edgeR |
| hsa-miR-548ba     | 3 | NOISeq,DESeq2,edgeR          |
| hsa-miR-433-3p    | 3 | NOISeq,DESeq2,edgeR          |
| hsa-miR-483-5p    | 3 | NOISeq,DESeq2,edgeR          |
| hsa-miR-382-3p    | 3 | Students t-test,DESeq2,edgeR |
| hsa-miR-5695      | 3 | Students t-test,DESeq2,edgeR |
| hsa-miR-301a-3p   | 3 | Students t-test,DESeq2,edgeR |
| hsa-miR-6516-5p   | 3 | Students t-test,DESeq2,edgeR |
| hsa-miR-654-3p    | 3 | Students t-test,DESeq2,edgeR |
| hsa-miR-335-5p    | 3 | Students t-test,DESeq2,edgeR |
| hsa-miR-3177-3p   | 3 | Students t-test,DESeq2,edgeR |
| hsa-miR-412-5p    | 3 | DESeq,DESeq2,edgeR           |
| hsa-miR-206       | 3 | NOISeq,DESeq2,edgeR          |
| hsa-miR-7706      | 3 | Students t-test,DESeq2,edgeR |
| hsa-miR-125b-1-3p | 3 | Students t-test,DESeq2,edgeR |
| hsa-miR-654-5p    | 3 | Students t-test,DESeq2,edgeR |
| hsa-miR-708-5p    | 3 | Students t-test,DESeq2,edgeR |
| hsa-miR-182-5p    | 3 | NOISeq,DESeq2,edgeR          |
| hsa-miR-6764-5p   | 3 | Students t-test,DESeq2,edgeR |
| hsa-miR-3115      | 3 | DESeq,DESeq2,edgeR           |
| hsa-miR-3118      | 3 | DESeq,DESeq2,edgeR           |
| hsa-miR-181b-2-3p | 3 | Students t-test,DESeq2,edgeR |
| hsa-miR-380-5p    | 3 | Students t-test,DESeq2,edgeR |
| hsa-miR-18b-5p    | 3 | Students t-test,DESeq2,edgeR |
| hsa-miR-106b-3p   | 3 | Students t-test,DESeq2,edgeR |
| hsa-miR-1226-3p   | 3 | Students t-test,DESeq2,edgeR |
| hsa-miR-4443      | 3 | Students t-test,DESeq2,edgeR |
| hsa-miR-16-2-3p   | 3 | Students t-test,DESeq2,edgeR |

|                   |   |                              |
|-------------------|---|------------------------------|
| hsa-miR-301a-3p   | 3 | Students t-test,DESeq2,edgeR |
| hsa-miR-671-5p    | 3 | Students t-test,DESeq2,edgeR |
| hsa-miR-1287-5p   | 3 | Students t-test,DESeq2,edgeR |
| hsa-miR-654-3p    | 3 | Students t-test,DESeq2,edgeR |
| hsa-miR-335-5p    | 3 | Students t-test,DESeq2,edgeR |
| hsa-miR-494-3p    | 3 | Students t-test,DESeq2,edgeR |
| hsa-miR-708-3p    | 3 | Students t-test,DESeq2,edgeR |
| hsa-miR-1296-5p   | 3 | Students t-test,DESeq2,edgeR |
| hsa-miR-199a-3p   | 3 | Students t-test,DESeq2,edgeR |
| hsa-miR-450a-2-3p | 3 | Students t-test,DESeq2,edgeR |
| hsa-miR-181a-5p   | 3 | Students t-test,DESeq2,edgeR |
| hsa-miR-1-3p      | 3 | NOISeq,DESeq2,edgeR          |
| hsa-miR-410-3p    | 3 | NOISeq,DESeq2,edgeR          |
| hsa-miR-382-5p    | 3 | Students t-test,DESeq2,edgeR |
| hsa-miR-485-5p    | 3 | Students t-test,DESeq2,edgeR |
| hsa-miR-889-3p    | 3 | Students t-test,DESeq2,edgeR |
| hsa-miR-218-5p    | 3 | Students t-test,DESeq2,edgeR |
| hsa-miR-409-5p    | 3 | Students t-test,DESeq2,edgeR |
| hsa-miR-424-3p    | 3 | Students t-test,DESeq2,edgeR |
| hsa-miR-25-3p     | 3 | Students t-test,DESeq2,edgeR |
| hsa-miR-132-3p    | 3 | Students t-test,DESeq2,edgeR |
| hsa-miR-181b-5p   | 3 | Students t-test,DESeq2,edgeR |
| hsa-miR-887-3p    | 3 | Students t-test,DESeq2,edgeR |
| hsa-miR-134-5p    | 3 | Students t-test,DESeq2,edgeR |
| hsa-miR-130b-5p   | 3 | Students t-test,DESeq2,edgeR |
| hsa-miR-125b-1-3p | 3 | Students t-test,DESeq2,edgeR |
| hsa-miR-654-5p    | 3 | Students t-test,DESeq2,edgeR |
| hsa-miR-379-5p    | 3 | Students t-test,DESeq2,edgeR |
| hsa-miR-335-3p    | 3 | Students t-test,DESeq2,edgeR |
| hsa-miR-708-5p    | 3 | Students t-test,DESeq2,edgeR |
| hsa-miR-1271-5p   | 3 | Students t-test,DESeq2,edgeR |
| hsa-miR-100-5p    | 3 | Students t-test,DESeq2,edgeR |
| hsa-miR-376c-3p   | 3 | Students t-test,DESeq2,edgeR |
| hsa-miR-431-5p    | 3 | NOISeq,DESeq2,edgeR          |
| hsa-miR-34a-5p    | 3 | Students t-test,DESeq2,edgeR |
| hsa-miR-493-5p    | 3 | Students t-test,DESeq2,edgeR |
| hsa-miR-409-3p    | 3 | Students t-test,DESeq2,edgeR |
| hsa-miR-4324      | 3 | Students t-test,DESeq2,edgeR |

**Supplementary:****INTEGRATIVE TRANSCRIPTOMIC PROFILING OF WILMS TUMOR**

Supplementary Table S6: *Cross-sectional analysis of FFT and FFPE differential expression*

miRNAs of HR, nHR and HR WT samples. We did not identify significant miRNAs for HR WT when HR samples were compared to nHR. In contrast, by comparing HR WT and nHR WT with HK samples, we identified 5 miRNAs with de-creased expression and 6 miRNAs with increased expression in HR WT (HR – High-Risk WT, nHR- non-High-Risk WT; HK – Healthy Kidney).

| <i>Decreased expression in WT tissue</i> | <i>Increased expression in WT tissue</i> |
|------------------------------------------|------------------------------------------|
|                                          |                                          |
| <b><i>HR vs nHR</i></b>                  | <b><i>HR vs nHR</i></b>                  |
| /                                        | /                                        |
|                                          |                                          |
| <b><i>HR vs HK</i></b>                   | <b><i>HR vs HK</i></b>                   |
| hsa-miR-483-3p                           | hsa-miR-141-3p                           |
| hsa-miR-483-5p                           | hsa-miR-363-3p                           |
| hsa-miR-873-5p                           | hsa-miR-139-5p                           |
| hsa-miR-708-3p                           | hsa-miR-200a-3p                          |
| hsa-miR-130b-5p                          | hsa-miR-200a-5p                          |
|                                          | hsa-miR-429                              |
|                                          |                                          |
| <b><i>nHR vs HK</i></b>                  | <b><i>nHR vs HK</i></b>                  |
| hsa-miR-873-5p                           | hsa-miR-509-3-5p                         |
| hsa-miR-483-5p                           | hsa-miR-192-5p                           |
| hsa-miR-483-3p                           | hsa-miR-204-5p                           |
| hsa-miR-323a-3p                          | hsa-miR-138-5p                           |
| hsa-miR-1269a                            | hsa-miR-194-5p                           |
| hsa-miR-433-3p                           | hsa-miR-514a-3p                          |
| hsa-miR-199b-5p                          | hsa-miR-12135                            |
| hsa-miR-199b-3p                          | hsa-miR-215-5p                           |
| hsa-miR-196b-5p                          | hsa-miR-187-3p                           |
| hsa-miR-329-3p                           | hsa-miR-508-3p                           |
| hsa-miR-493-3p                           | hsa-miR-30a-5p                           |
| hsa-miR-181a-2-3p                        | hsa-miR-200a-3p                          |
| hsa-miR-758-3p                           | hsa-miR-190a-5p                          |
| hsa-miR-181a-3p                          | hsa-miR-429                              |
| hsa-miR-127-3p                           | hsa-miR-184                              |
| hsa-miR-3912-3p                          | hsa-miR-12136                            |
| hsa-miR-382-3p                           | hsa-miR-29c-3p                           |
| hsa-miR-301a-3p                          | hsa-miR-139-5p                           |
| hsa-miR-654-3p                           | hsa-miR-30c-5p                           |
| hsa-miR-335-5p                           | hsa-miR-30a-3p                           |
| hsa-miR-494-3p                           | hsa-miR-200a-5p                          |
| hsa-miR-199a-3p                          | hsa-miR-30c-2-3p                         |
| hsa-miR-382-5p                           | hsa-miR-29c-5p                           |
| hsa-miR-409-5p                           | hsa-miR-378a-3p                          |
| hsa-miR-181b-5p                          | hsa-miR-30d-3p                           |
| hsa-miR-130b-5p                          | hsa-miR-29a-3p                           |
| hsa-miR-125b-1-3p                        | hsa-miR-200b-3p                          |
| hsa-miR-654-5p                           | hsa-miR-422a                             |
| hsa-miR-335-3p                           | hsa-miR-455-5p                           |
| hsa-miR-708-5p                           | hsa-miR-378c                             |
| hsa-miR-431-5p                           | hsa-miR-378d                             |
|                                          | hsa-miR-378e                             |
|                                          | hsa-miR-101-3p                           |
|                                          | hsa-miR-378f                             |
|                                          | hsa-miR-378g                             |
|                                          | hsa-miR-378i                             |
|                                          | hsa-miR-29b-3p                           |
|                                          | hsa-miR-200c-3p                          |
|                                          | hsa-miR-22-5p                            |
|                                          | hsa-miR-30b-5p                           |
|                                          | hsa-miR-141-3p                           |
|                                          | hsa-miR-126-5p                           |
|                                          | hsa-miR-126-3p                           |

**Supplementary:**  
**INTEGRATIVE TRANSCRIPTOMIC PROFILING OF WILMS TUMOR**

Supplementary Table S8: Predicted mRNAs regulated by differentially expressed miRNAs identified by miRnet in silico minimal network pathway analysis. Highlighted mRNA transcripts in red represent differentially expressed transcripts in the WT, as confirmed by mRNA sequencing analysis.

| Prostate cancer | Focal adhesion | Pathways in cancer | Bladder cancer | Glioma | p53 signaling pathway | Melanoma | Chronic myeloid leukemia | Small cell lung cancer | Apoptosis | Epstein-Barr virus infection |
|-----------------|----------------|--------------------|----------------|--------|-----------------------|----------|--------------------------|------------------------|-----------|------------------------------|
| CCND1           | CCND1          | FAS                | CCND1          | CCND1  | FAS                   | CCND1    | CCND1                    | CCND1                  | FAS       | RBPJ                         |
| BCL2            | BCL2           | CCND1              | ERBB2          | AKT1   | ATM                   | AKT1     | AKT1                     | AKT1                   | ATM       | AKT1                         |
| AKT1            | DIAPH1         | BCL2               | MDM2           | IGF1R  | CCND1                 | IGF1R    | CDKN1B                   | CDKN1B                 | BCL2      | CDKN1B                       |
| CDKN1B          | AKT1           | HIF1A              |                | MDM2   | MDM2                  | MDM2     | MDM2                     | ITGA3                  | AKT1      | MDM2                         |
| IGF1R           | CAV1           | AKT1               |                |        |                       |          |                          |                        |           |                              |
| ERBB2           | IGF1R          | CDKN1B             |                |        |                       |          |                          |                        |           |                              |
| MDM2            | ITGA3          | IGF1R              |                |        |                       |          |                          |                        |           |                              |
|                 | ERBB2          | ITGA3              |                |        |                       |          |                          |                        |           |                              |
|                 | VAV3           | ERBB2              |                |        |                       |          |                          |                        |           |                              |
|                 |                | MDM2               |                |        |                       |          |                          |                        |           |                              |
