# Supplementary material for: Integrative Transcriptomic Profiling of the Wilms Tumor
Source: Cancers (Basel). 2023 Jul 28;15(15):3846. doi: 10.3390/cancers15153846 (PMC10416970; doi:10.3390/cancers15153846)
Supplement: Supplementary file 1 [file cancers-15-03846-s001.zip › Supplementary Table S2c.csv]

INTEGRATIVE TRANSCRIPTOMIC PROFILING OF WILMS TUMOR
Supplementary Table S2c: FFT DESeq2 differential expression results.
name	mean_Tumor	mean_Normal	FoldChange	log2FoldChange	pvalue	padj
hsa-miR-514a-3p	488.2523344	94025.53275	192.184127	7.588957602	2.19E-39	1.42E-36
hsa-miR-514a-5p	1.2079342	242.7049952	110.3769285	7.453662215	7.39E-28	2.41E-25
hsa-miR-934	1.32684492	599.4445481	258.0509526	8.699252354	4.75E-25	1.03E-22
hsa-miR-508-3p	34.56282744	3449.401557	97.02270052	6.638361406	3.47E-24	4.73E-22
hsa-miR-192-5p	29639.84834	894624.2648	30.18217477	4.915663596	3.63E-24	4.73E-22
hsa-miR-506-3p	15.40844151	1623.492316	99.0034498	6.722945019	9.83E-24	8.57E-22
hsa-miR-187-3p	33.62768095	1000.20791	28.9135132	4.883116359	1.05E-23	8.57E-22
hsa-miR-135a-3p	286.365947	1.248635383	0.007824989	-7.645454114	9.86E-24	8.57E-22
hsa-miR-514b-3p	0.256311093	111.8406179	89.8190094	8.128078027	1.44E-21	1.04E-19
hsa-miR-194-5p	4037.883593	76385.42182	18.91275647	4.241582342	2.50E-21	1.63E-19
hsa-miR-509-3-5p	121.0531479	12011.77232	98.42247027	6.630672919	4.07E-21	2.41E-19
hsa-miR-508-5p	2.308450909	251.7072029	76.38233417	6.707139375	6.04E-20	3.28E-18
hsa-miR-513a-5p	0.117926104	86.48946928	78.26051202	8.309390315	1.02E-18	5.10E-17
hsa-miR-509-3p	24.27519375	1277.020478	50.56422082	5.703668154	3.22E-18	1.50E-16
hsa-miR-509-5p	18.42472527	1197.033703	61.67570898	6.000764133	2.16E-17	9.37E-16
hsa-miR-514b-5p	0.117926104	39.46917627	36.2002248	7.178650754	3.33E-16	1.36E-14
hsa-miR-301b-3p	487.8068358	10.60892164	0.023749508	-5.548845249	1.19E-15	4.57E-14
hsa-miR-190a-5p	63.84693907	1116.261221	17.22920522	4.132429212	4.03E-14	1.46E-12
hsa-miR-873-3p	301.6889814	9.974921169	0.03625808	-4.902782161	4.71E-14	1.61E-12
hsa-miR-141-5p	3.200868868	58.05625916	14.05810584	4.027708108	3.17E-13	1.03E-11
hsa-miR-510-5p	0.356191915	32.9996036	25.06990583	6.101502956	6.80E-13	2.11E-11
hsa-miR-192-3p	0.860462656	50.65807755	27.76625341	5.798933544	7.39E-13	2.19E-11
hsa-miR-873-5p	361.5368583	31.86705984	0.090658533	-3.504495019	7.85E-13	2.22E-11
hsa-miR-9-5p	1024.486362	10634.2473	10.37093003	3.375929971	1.22E-12	3.32E-11
hsa-miR-194-3p	37.73996372	573.2747841	14.82383381	3.919316939	2.37E-12	6.17E-11
hsa-miR-139-3p	117.784598	709.3961083	5.980540576	2.594544028	3.34E-12	8.37E-11
hsa-miR-141-3p	113.8375552	1995.595382	17.38625817	4.128482507	5.00E-12	1.20E-10
hsa-miR-6500-3p	4.79959403	49.62266971	8.728657463	3.400156005	6.37E-12	1.48E-10
hsa-miR-130b-5p	8501.272695	460.373469	0.054264723	-4.206256614	3.39E-11	7.62E-10
hsa-miR-216b-5p	13.81389653	300.5216082	20.35397018	4.423369511	1.32E-10	2.85E-09
hsa-miR-708-5p	7438.969405	1751.140115	0.235503672	-2.086874505	1.39E-10	2.91E-09
hsa-miR-22-3p	10284.9801	38751.26832	3.767484279	1.913759958	2.27E-10	4.63E-09
hsa-miR-18a-5p	536.1632445	62.27453591	0.117793867	-3.105226903	6.27E-10	1.24E-08
hsa-miR-378a-3p	32169.61501	151476.9622	4.708581484	2.235317586	6.64E-10	1.27E-08
hsa-miR-12136	65.8534671	702.9188647	10.52927986	3.416779384	7.28E-10	1.35E-08
hsa-miR-106b-3p	37297.36049	7129.735816	0.191180945	-2.387162765	3.43E-09	6.20E-08
hsa-miR-203a-3p	827.3350365	8645.823239	10.43879935	3.385651916	3.56E-09	6.26E-08
hsa-miR-139-5p	2444.495323	11531.9588	4.716001171	2.238294135	4.03E-09	6.83E-08
hsa-miR-216a-3p	3.88503385	62.09534268	12.91605025	3.952019366	4.09E-09	6.83E-08
hsa-miR-378i	35.40287758	175.3834842	4.845317073	2.305765107	4.48E-09	7.29E-08
hsa-miR-301a-3p	148.8545327	20.78002098	0.145341089	-2.837747115	4.73E-09	7.51E-08
hsa-miR-130b-3p	1194.583275	77.72995638	0.065850667	-3.940051117	1.17E-08	1.81E-07
hsa-miR-23a-5p	12.37019814	83.01000648	6.283377824	2.762445232	1.26E-08	1.91E-07
hsa-miR-378d	322.6356354	1735.1187	5.364423785	2.425909361	1.86E-08	2.75E-07
hsa-miR-217-5p	67.95727868	882.5396187	12.81285508	3.694471368	1.99E-08	2.88E-07
hsa-miR-93-5p	43384.69143	8048.086682	0.185523992	-2.430465229	2.14E-08	3.03E-07
hsa-miR-362-5p	759.5557322	3328.123247	4.377224583	2.13142957	2.22E-08	3.08E-07
hsa-miR-378c	935.5361111	4353.569874	4.649655066	2.21797881	2.76E-08	3.72E-07
hsa-miR-206	61731.03724	495.9747521	0.008050516	-6.959944291	2.80E-08	3.72E-07
hsa-miR-200a-5p	2128.05829	12852.96931	6.037396612	2.594360635	3.17E-08	4.13E-07
hsa-miR-455-5p	11377.79131	32694.89985	2.87340711	1.522794331	3.60E-08	4.60E-07
hsa-miR-199b-5p	56102.8451	7392.321417	0.131779228	-2.923936593	3.89E-08	4.86E-07
hsa-miR-483-5p	4932.574388	280.2576597	0.057008902	-4.136237012	4.06E-08	4.99E-07
hsa-miR-378g	147.5335465	623.3604814	4.203498105	2.077019922	4.77E-08	5.75E-07
hsa-miR-181a-2-3p	15391.22352	3423.364002	0.222473641	-2.168545131	5.01E-08	5.92E-07
hsa-miR-4443	467.573812	92.03423545	0.198547663	-2.34092502	5.09E-08	5.92E-07
hsa-miR-6818-5p	17.76341349	0.367228584	0.07286673	-5.181451063	5.80E-08	6.58E-07
hsa-miR-93-3p	387.9400449	76.464232	0.19916754	-2.33794089	5.86E-08	6.58E-07
hsa-miR-5695	21.89755039	0.749174422	0.076391334	-4.731123431	7.41E-08	8.17E-07
hsa-miR-483-3p	17503.92025	551.4127862	0.031557572	-4.987928592	7.61E-08	8.25E-07
hsa-miR-183-5p	225547.126	7311.38386	0.032420504	-2.994759894	1.25E-07	1.33E-06
hsa-miR-25-3p	111558.1729	31949.74528	0.286401776	-1.803922346	1.29E-07	1.36E-06
hsa-miR-7706	3564.159665	362.2529043	0.101889659	-3.297769544	1.71E-07	1.77E-06
hsa-miR-877-5p	2394.969002	316.6331873	0.132569823	-2.91819323	1.76E-07	1.79E-06
hsa-miR-138-5p	44.80340641	425.9266209	9.320848696	3.255299026	1.85E-07	1.85E-06
hsa-miR-760	269.0395788	52.73597845	0.198992972	-2.347150959	2.03E-07	2.00E-06
hsa-miR-96-5p	13333.13013	1069.996834	0.080319963	-3.639240623	2.05E-07	2.00E-06
hsa-miR-12135	19.72638371	161.1585234	7.823773102	3.044065631	2.10E-07	2.01E-06
hsa-miR-500b-5p	20.99769413	96.12082446	4.41504568	2.177917007	2.29E-07	2.16E-06
hsa-miR-301a-5p	567.9155119	113.8381292	0.201854453	-2.318609172	2.40E-07	2.23E-06
hsa-miR-215-5p	421.4214395	3800.326053	8.9988947	3.171339554	2.50E-07	2.28E-06
hsa-miR-1269a	10774.50883	179.0891111	0.016712817	-5.910786097	2.59E-07	2.28E-06
hsa-miR-25-5p	684.121489	83.05561027	0.122687161	-3.037125349	2.58E-07	2.28E-06
hsa-miR-181b-3p	328.0859279	58.11515207	0.179634397	-2.498297688	2.57E-07	2.28E-06
hsa-miR-184	110.4089071	1969.781579	17.68962312	4.161803767	3.21E-07	2.78E-06
hsa-miR-22-5p	372.7757203	1418.874354	3.798733511	1.929374484	3.33E-07	2.86E-06
hsa-miR-431-3p	438.4922689	33.91052688	0.079433768	-3.686047243	3.58E-07	3.02E-06
hsa-miR-5588-5p	2.639718223	23.19697654	6.64803566	3.218375078	4.79E-07	4.00E-06
hsa-miR-181b-2-3p	121.0337215	19.68388536	0.169493195	-2.597724836	5.44E-07	4.48E-06
hsa-miR-454-5p	135.371401	26.76126377	0.20357101	-2.332429344	6.61E-07	5.38E-06
hsa-miR-135b-3p	320.0729084	35.79662354	0.114605196	-3.156983745	7.00E-07	5.63E-06
hsa-miR-433-3p	2354.981504	220.0988453	0.093845747	-3.418020134	7.37E-07	5.85E-06
hsa-miR-1292-5p	93.51543604	10.69231153	0.123707957	-3.108470288	7.50E-07	5.89E-06
hsa-miR-17-5p	35671.14484	7958.687802	0.223134545	-2.164129312	8.33E-07	6.46E-06
hsa-miR-216a-5p	7.981756143	75.43321207	8.509829353	3.208568025	1.17E-06	8.93E-06
hsa-miR-182-5p	263542.013	11662.49232	0.044256504	-2.792546417	1.19E-06	9.01E-06
hsa-miR-18a-3p	215.8455893	34.2558756	0.162585164	-2.647423851	1.26E-06	9.41E-06
hsa-miR-323a-3p	1941.917113	278.0282811	0.143613065	-2.802704433	1.31E-06	9.67E-06
hsa-miR-937-3p	75.54866396	10.22481349	0.146636308	-2.857208395	1.43E-06	1.05E-05
hsa-miR-6721-5p	42.05757153	2.393317682	0.07880885	-4.067521988	1.49E-06	1.07E-05
hsa-miR-6505-5p	94.64955565	11.62214961	0.131962449	-3.011506613	1.50E-06	1.07E-05
hsa-miR-181a-3p	7076.822242	1493.525891	0.211156178	-2.244418058	1.86E-06	1.30E-05
hsa-miR-378e	9.718639924	43.19121547	4.122837952	2.128976843	1.84E-06	1.30E-05
hsa-miR-597-3p	45.01269245	9.448000965	0.227067803	-2.273873426	2.27E-06	1.57E-05
hsa-miR-106b-5p	6263.722268	1661.202143	0.265327348	-1.914859782	2.56E-06	1.75E-05
hsa-miR-429	3460.496856	15876.86947	4.586995202	2.197811227	2.71E-06	1.83E-05
hsa-miR-4286	69.51883437	16.13035257	0.242918828	-2.113639756	3.59E-06	2.41E-05
hsa-miR-149-5p	6050.257171	984.1762278	0.162805216	-2.619547497	3.92E-06	2.60E-05
hsa-miR-431-5p	468.2704645	35.61257728	0.078020204	-3.712270549	4.15E-06	2.73E-05
hsa-miR-4746-5p	79.42059995	9.71406723	0.133225408	-2.999665601	4.62E-06	3.00E-05
hsa-miR-6514-5p	50.05110071	5.154245239	0.120550687	-3.307141138	4.88E-06	3.15E-05
hsa-miR-3912-3p	216.0760099	39.2123989	0.185245707	-2.468850542	4.97E-06	3.17E-05
hsa-miR-7974	61.07809664	6.940766654	0.127915756	-3.103832605	5.18E-06	3.27E-05
hsa-miR-329-3p	550.5950265	110.9744185	0.203001139	-2.306389914	6.19E-06	3.88E-05
hsa-miR-6877-5p	47.15149388	3.547601403	0.09444362	-3.670664243	6.40E-06	3.93E-05
hsa-miR-1306-3p	132.0035773	25.60808104	0.200055379	-2.360265318	6.35E-06	3.93E-05
hsa-miR-188-5p	52.32632746	156.9438263	2.96183581	1.571753943	9.30E-06	5.66E-05
hsa-miR-660-3p	13.19474183	57.67425596	4.133520472	2.119999187	1.05E-05	6.31E-05
hsa-miR-204-5p	10903.03038	76734.29875	7.037333546	2.815124092	1.20E-05	7.17E-05
hsa-miR-502-5p	21.94425304	113.5844441	4.994036804	2.37157403	1.27E-05	7.50E-05
hsa-miR-4470	51.25895215	6.651718312	0.146419283	-2.945358067	1.29E-05	7.55E-05
hsa-miR-200a-3p	22928.07702	127222.1243	5.548549737	2.472149746	1.45E-05	8.43E-05
hsa-miR-532-3p	685.0567624	2343.135555	3.416824502	1.773913549	1.49E-05	8.60E-05
hsa-miR-29c-5p	285.636795	1224.649176	4.275965953	2.10072918	1.58E-05	8.97E-05
hsa-miR-500a-5p	112.0538461	333.9525722	2.962770253	1.574696178	1.58E-05	8.97E-05
hsa-miR-128-3p	103751.6251	19789.66575	0.190748578	-2.390296886	1.65E-05	9.28E-05
hsa-miR-15b-3p	239.9366113	50.06146979	0.211929061	-2.27295517	1.84E-05	0.000102378
hsa-miR-30c-2-3p	4461.296361	25158.78491	5.638304333	2.495491723	1.99E-05	0.000109696
hsa-miR-3187-3p	34.75988532	3.242075059	0.11862664	-3.389727833	2.34E-05	0.000128232
hsa-miR-31-5p	189.2970627	557.3279901	2.933981124	3.365264068	2.50E-05	0.000135877
hsa-miR-30a-5p	450943.5073	2331001.986	5.169157066	2.369927131	3.09E-05	0.000166368
hsa-miR-29b-1-5p	4.416271116	19.910596	3.86069965	2.23626401	3.30E-05	0.000176304
hsa-miR-16-2-3p	1684.643794	535.1351056	0.318059549	-1.654145906	3.33E-05	0.000176499
hsa-miR-181b-5p	71433.17087	13027.21905	0.18238077	-2.455060829	3.42E-05	0.000179544
hsa-miR-551a	19.22356487	4.393042217	0.266671195	-2.088929477	3.66E-05	0.000190374
hsa-miR-9-3p	35.56340845	155.6413314	4.284100911	2.139706328	3.74E-05	0.000193316
hsa-miR-335-3p	11478.81067	2512.05003	0.218910407	-2.191945005	3.83E-05	0.000196449
hsa-miR-3177-3p	56.55959302	11.56094954	0.218225128	-2.292432231	3.87E-05	0.000197028
hsa-miR-1304-5p	23.59254818	7.111920455	0.329852783	-1.655756756	3.96E-05	0.000199751
hsa-miR-378f	3.42578214	17.90735349	4.272093132	2.266428602	4.16E-05	0.000208479
hsa-miR-500b-3p	37.01648529	117.0467138	3.105145383	1.657228038	4.72E-05	0.000231114
hsa-miR-200c-3p	5184.295409	27910.36888	5.382792431	2.428481859	4.69E-05	0.000231114
hsa-miR-532-5p	31070.03206	89684.98171	2.886482224	1.52932315	4.69E-05	0.000231114
hsa-miR-1843	2326.108507	464.3175618	0.199955249	-2.324913307	4.95E-05	0.000240503
hsa-miR-218-5p	64924.76082	21221.68919	0.32687625	-1.613288521	5.29E-05	0.000253122
hsa-miR-4802-3p	9.5438296	32.70942277	3.19707583	1.787715509	5.26E-05	0.000253122
hsa-miR-196a-5p	50374.0541	8215.753295	0.163111553	-2.616227344	5.60E-05	0.000266242
hsa-miR-3917	34.54551942	10.11770776	0.312773816	-1.720182416	5.88E-05	0.000277611
hsa-miR-29c-3p	133.9462881	710.3037198	5.2710136	2.406790554	6.08E-05	0.000284647
hsa-miR-362-3p	11.00632708	62.86739756	5.319478398	2.478060999	6.25E-05	0.000290475
hsa-miR-410-3p	295.2149121	49.66536245	0.171042579	-2.567045015	6.39E-05	0.000294967
hsa-miR-30c-5p	100554.7189	324036.0165	3.222462332	1.688170422	6.44E-05	0.000295311
hsa-miR-29b-2-5p	245.780405	149.5225403	0.609945268	1.801856853	6.64E-05	0.000302249
hsa-miR-145-5p	10938.60727	26804.01375	2.450272034	1.293048307	6.95E-05	0.000314228
hsa-miR-378a-5p	99.11489578	316.7526117	3.173879463	1.67573288	7.67E-05	0.000344484
hsa-miR-30b-5p	12654.99565	47579.81696	3.759547513	1.910651156	7.83E-05	0.000349245
hsa-miR-196b-5p	14113.40689	4376.828107	0.310167345	-1.689103999	9.33E-05	0.000413387
hsa-miR-182-3p	329.2753879	8.702940874	0.029378335	-2.996793554	9.82E-05	0.000432109
hsa-miR-200b-3p	58422.16938	257897.0541	4.414311255	2.142200249	0.000111399	0.000486719
hsa-miR-412-5p	473.11042	58.03145878	0.124509938	-3.026548836	0.000120356	0.000522346
hsa-miR-3928-3p	119.7297418	44.68846847	0.3784359	-1.413163834	0.000127244	0.00054858
hsa-miR-708-3p	4864.256175	1933.254631	0.397564807	-1.331535738	0.000128119	0.000548721
hsa-miR-342-3p	11604.73225	2780.197164	0.239639956	-1.000225832	0.000158813	0.000675734
hsa-miR-20a-5p	46783.15219	17221.21155	0.368120629	-1.441804683	0.000165591	0.0007
hsa-miR-502-3p	1346.993376	3693.910713	2.741045155	1.455364254	0.000173245	0.000727628
hsa-miR-409-5p	931.1602775	230.1359711	0.247957327	-2.014622961	0.00017983	0.000750446
hsa-miR-1301-3p	2003.23383	675.354069	0.337462655	-1.567632909	0.000182564	0.000757003
hsa-miR-335-5p	6024.98933	1897.576452	0.315064689	-1.666623438	0.000220712	0.000909387
hsa-miR-181c-3p	1434.727456	442.3928997	0.308828042	-1.696565061	0.000235137	0.000962731
hsa-miR-18b-5p	16.46613249	2.805586012	0.217883725	-2.438692738	0.000253907	0.001026669
hsa-miR-758-3p	368.6490501	113.7575758	0.310450076	-1.694075637	0.000253176	0.001026669
hsa-miR-654-5p	1132.146713	268.0130337	0.237403533	-2.078159872	0.000259855	0.001037828
hsa-miR-889-3p	1781.75141	378.6154065	0.212937936	-2.234362412	0.000259377	0.001037828
hsa-miR-376a-3p	120.6341552	27.60048985	0.235135352	-2.119376832	0.000273405	0.001085283
hsa-miR-140-5p	3860.424437	5860.616075	1.51799321	0.999104787	0.000286182	0.001129119
hsa-miR-487a-5p	47.99703361	10.86443941	0.242146076	-2.117244456	0.000342363	0.001342641
hsa-miR-484	9537.754378	2961.126397	0.310535976	-1.687278314	0.000350276	0.001365448
hsa-miR-125b-1-3p	2556.489749	1011.009813	0.395704348	-1.337862788	0.000371345	0.001438963
hsa-miR-211-5p	21.79460408	111.1921432	4.921872861	2.344807026	0.000375538	0.0014466
hsa-miR-205-5p	205.7601617	33.93041629	0.168941715	-2.59971302	0.000405622	0.001553294
hsa-miR-181a-5p	301582.6483	80261.49347	0.266136755	-1.90977336	0.000419854	0.00159839
hsa-miR-378h	1.870039426	8.412946852	3.279727368	2.237526998	0.000435667	0.001648948
hsa-miR-345-3p	20.35219171	4.304054379	0.24840796	-2.186330116	0.000440157	0.001656313
hsa-miR-660-5p	2605.722675	7538.949641	2.892501651	1.532532912	0.00044881	0.001679167
hsa-miR-943	50.26262842	10.10851136	0.216698045	-2.287754255	0.000458754	0.001706564
hsa-miR-29b-3p	558.9681604	2217.571858	3.961960724	1.988510557	0.000468009	0.001731103
hsa-miR-432-5p	1612.429186	383.1268221	0.238080993	-2.073076372	0.000476619	0.00175299
hsa-miR-200b-5p	317.3398935	1137.168536	3.575324862	1.840908951	0.000505741	0.001849648
hsa-miR-30d-3p	428.2578763	1165.553754	2.71760594	1.444662532	0.000520035	0.0018913
hsa-miR-135b-5p	5243.874308	1460.417463	0.278637271	-1.844271681	0.000536659	0.001923413
hsa-miR-3064-5p	172.8001223	13.92548131	0.085877277	-1.609364633	0.000533918	0.001923413
hsa-miR-99b-3p	14131.40752	6915.477596	0.489405474	-1.030994177	0.000537728	0.001923413
hsa-miR-744-5p	14360.45414	5171.3378	0.360154184	-1.473396538	0.000550799	0.001959401
hsa-miR-380-5p	57.79132238	11.94932138	0.22025906	-2.256659792	0.000557601	0.00197261
hsa-let-7e-3p	595.2063101	303.5521147	0.510816658	-0.968915321	0.000560573	0.00197261
hsa-miR-500a-3p	4305.136304	10763.58262	2.49982394	1.321965972	0.000637319	0.002230615
hsa-miR-422a	4.375104996	14.44665933	2.873740949	1.704103344	0.000642039	0.00223512
hsa-miR-766-3p	228.771896	74.4483739	0.328362064	-1.619225716	0.000671608	0.00232562
hsa-miR-411-3p	349.6231306	76.41727636	0.220799113	-2.191188478	0.000750566	0.002585283
hsa-miR-6516-5p	388.4203728	19.31331862	0.052162958	-1.777530701	0.000771558	0.002643602
hsa-miR-1185-1-3p	149.7920028	36.62700756	0.249529198	-2.022321083	0.000793465	0.002704427
hsa-miR-4664-3p	57.25327175	12.8370456	0.237532506	-2.140383624	0.000808737	0.002742124
hsa-miR-615-3p	32665.14254	7221.470239	0.221099575	-2.177348294	0.000899055	0.003032564
hsa-miR-128-1-5p	62.19778482	23.57128724	0.388799818	-1.375597195	0.00094983	0.003187315
hsa-miR-6511a-3p	80.88291801	22.3207622	0.284806194	-1.840974671	0.001043125	0.003447079
hsa-miR-365a-3p	111.028444	261.6370731	2.344378479	1.236115715	0.001038709	0.003447079
hsa-miR-365b-3p	111.028444	261.6370731	2.344378479	1.236115715	0.001038709	0.003447079
hsa-miR-203b-3p	17.35473498	91.03358343	5.014160299	2.383161713	0.001114871	0.00366556
hsa-miR-582-3p	1130.653575	3041.112503	2.688201205	1.426823576	0.001161061	0.003798246
hsa-miR-4504	10.22340526	31.73410212	2.916592724	1.597154215	0.001190161	0.003873973
hsa-miR-493-5p	8025.9895	2409.034816	0.300241431	-1.736143061	0.00124243	0.004023989
hsa-miR-6511b-3p	112.2122765	33.78475487	0.307252499	-1.715564601	0.001324568	0.00426878
hsa-miR-34a-5p	3486.374184	1433.094326	0.411224678	-1.282198048	0.001337059	0.004287811
hsa-miR-615-5p	126.9870283	27.89697857	0.225780526	-2.174902868	0.001372559	0.004380078
hsa-miR-654-3p	3836.112871	1342.461532	0.350123016	-1.514765844	0.001392766	0.00442288
hsa-miR-381-3p	25672.42492	8128.001936	0.31663099	-1.659249124	0.001401961	0.004430469
hsa-miR-379-3p	203.61943	49.65383548	0.247551445	-2.032819078	0.001436122	0.004516499
hsa-miR-592	276.8370431	48.11519498	0.176776986	-2.526320138	0.001510452	0.004727423
hsa-miR-2355-3p	87.07352378	29.34247769	0.344513043	-1.553098952	0.001524953	0.004744454
hsa-miR-92a-1-5p	160.2730705	55.92309433	0.352960939	-1.510646609	0.001530469	0.004744454
hsa-miR-382-5p	2523.204106	826.08294	0.327660881	-1.6106761	0.001570429	0.004830795
hsa-miR-382-3p	1114.397751	363.2695046	0.326582606	-1.617040642	0.001573162	0.004830795
hsa-miR-501-5p	195.1738805	435.8661343	2.226933235	1.160844598	0.001612752	0.004929116
hsa-miR-655-3p	88.40347704	23.77795105	0.27714751	-1.902344777	0.001624831	0.004942827
hsa-miR-20a-3p	40.65877529	14.78521877	0.378917015	-1.432793203	0.001707023	0.00512107
hsa-miR-501-3p	1704.007376	3629.01643	2.129032684	1.090655913	0.001699379	0.00512107
hsa-miR-29a-5p	5.928828457	24.30208192	3.651711409	2.043738467	0.001691729	0.00512107
hsa-miR-487a-3p	86.39974919	26.86421635	0.318813459	-1.67556342	0.001750562	0.005227594
hsa-miR-30a-3p	38868.63927	137615.9785	3.540474805	1.823961788	0.001810336	0.00538141
hsa-miR-320c	887.2424071	283.5358045	0.320335758	-1.64404914	0.002063218	0.00610525
hsa-miR-204-3p	197.5171828	994.3398312	5.013872437	2.331020834	0.002073508	0.006107934
hsa-miR-495-3p	1635.38206	586.1374278	0.358802166	-1.479461163	0.002171072	0.006366521
hsa-miR-345-5p	5131.058512	1486.984724	0.289939158	-1.786838849	0.002228345	0.006505168
hsa-miR-3200-3p	178.6217469	57.5747029	0.326100285	-1.634010598	0.002335222	0.006786739
hsa-miR-7977	223.4864721	94.38001525	0.424880904	-1.240895453	0.002411504	0.006977286
hsa-miR-29a-3p	13588.26483	42446.00173	3.123568659	1.643263434	0.002459945	0.007085947
hsa-miR-4798-5p	14.13670662	2.872939212	0.25586406	-2.368251268	0.002568175	0.007350702
hsa-miR-320b	2748.615668	989.2597284	0.360144779	-1.47367483	0.002574439	0.007350702
hsa-miR-4661-5p	27.93587044	27.89376411	0.99854484	1.134889743	0.002622042	0.007453927
hsa-miR-125a-3p	817.1442072	324.8344917	0.398260464	-1.329202287	0.002686523	0.007604028
hsa-miR-374b-3p	305.647571	153.5293629	0.503931475	-0.995696083	0.002706619	0.007627743
hsa-miR-10a-3p	12292.99811	4015.081713	0.32667011	-1.614367372	0.002738928	0.007685528
hsa-miR-1296-5p	540.1787449	222.3122833	0.412640528	-1.279175765	0.002751555	0.007687821
hsa-miR-489-3p	35.04111559	168.5417381	4.70412015	2.258704652	0.002879296	0.008010348
hsa-miR-370-3p	11005.71451	3485.000487	0.316715809	-1.658925454	0.002900152	0.008034038
hsa-miR-744-3p	73.58739446	30.56183004	0.423152334	-1.27609429	0.002932993	0.008090586
hsa-miR-6818-3p	37.40751993	9.126453003	0.263658081	-2.008709985	0.002950566	0.008104718
hsa-miR-219a-1-3p	76.03275651	32.37872719	0.433305631	-1.222370404	0.002989349	0.008176748
hsa-miR-30e-5p	30389.27601	64850.19087	2.133945439	1.093534831	0.003210369	0.008744561
hsa-miR-153-3p	13.90020544	4.946141307	0.399064384	-1.624075275	0.003304301	0.008962917
hsa-miR-2277-5p	136.5625765	67.33576638	0.496761315	-1.019390701	0.003325689	0.008968543
hsa-miR-181d-5p	6068.028958	2414.80863	0.398055216	-1.329135908	0.003333928	0.008968543
hsa-miR-421	812.3252194	349.9803489	0.431537521	-1.216338745	0.003386272	0.009071865
hsa-miR-363-3p	14481.11761	30442.3645	2.102134876	1.071884363	0.003474172	0.009231371
hsa-miR-543	2437.09722	757.3071213	0.311024152	-1.685505692	0.003466496	0.009231371
hsa-miR-21-3p	523.6776277	1330.06363	2.53691707	1.34479074	0.00352876	0.009334683
hsa-miR-494-3p	921.1827618	339.649176	0.36939443	-1.438047271	0.003541731	0.009334683
hsa-miR-342-5p	812.0737741	177.7596163	0.219856576	-1.143535984	0.00361065	0.009477957
hsa-miR-487b-3p	778.9248142	261.6140175	0.336717095	-1.573135093	0.003674786	0.009607573
hsa-miR-376a-5p	45.2131776	11.06060915	0.260977708	-2.01059554	0.003713009	0.009668676
hsa-miR-4429	34.80518651	11.27616733	0.34286003	-1.596464308	0.003887338	0.010082299
hsa-miR-30e-3p	16014.02176	35467.29553	2.214689188	1.147131641	0.004127806	0.010640945
hsa-miR-3609	34.49464075	11.46574983	0.351200902	-1.545041371	0.004135421	0.010640945
hsa-let-7d-5p	33631.94245	17890.72085	0.531970133	-0.910614025	0.004281532	0.010973532
hsa-miR-143-3p	1135220.783	2263487.068	1.993873005	0.995572584	0.004737161	0.012046453
hsa-miR-99b-5p	200769.0581	123986.4414	0.617559424	-0.695343949	0.004723211	0.012046453
hsa-miR-140-3p	46192.86362	84939.4285	1.838781644	0.878755642	0.004847057	0.012277955
hsa-miR-103a-3p	189942.8693	111391.3837	0.586448955	-0.769922267	0.004908795	0.012386145
hsa-miR-15b-5p	1602.708118	896.0482874	0.559358824	-0.83884442	0.005122774	0.012876162
hsa-miR-92a-3p	157527.5391	80951.11428	0.513888561	-0.960472358	0.005225046	0.013082711
hsa-miR-4639-5p	85.57925863	5.410547284	0.074042529	-1.606838079	0.005430256	0.013544432
hsa-miR-191-3p	62.84232758	20.87048355	0.342570272	-1.564056449	0.005476141	0.013606748
hsa-miR-320a-3p	60075.95502	25768.72334	0.428945231	-1.221138173	0.005781116	0.014309912
hsa-miR-628-3p	51.19300631	23.65760863	0.472431277	-1.11157033	0.005913811	0.014582919
hsa-miR-1284	7.795592191	2.314006786	0.376780405	-1.743954639	0.006031445	0.014816871
hsa-miR-130a-5p	112.2304412	40.58963149	0.367300799	-1.468803206	0.006090316	0.014889577
hsa-miR-486-3p	134.9612105	39.62535648	0.298801079	-1.768917152	0.006106785	0.014889577
hsa-miR-891a-5p	8.081090355	83.65373038	9.321978647	3.405668144	0.006203041	0.015067835
hsa-miR-548ab	4.727993938	12.99090682	2.442549167	1.455087161	0.006302618	0.015252804
hsa-miR-340-3p	1980.744816	903.2422038	0.456285893	-1.132427385	0.006339088	0.015284246
hsa-miR-653-5p	180.4433587	645.3797721	3.562432799	1.836720916	0.006503048	0.015450673
hsa-miR-455-3p	1513.03164	3161.552573	2.088828588	1.062850108	0.006446397	0.015450673
hsa-miR-196a-3p	2661.891729	350.9914211	0.132183903	-2.923243878	0.006499533	0.015450673
hsa-miR-199b-3p	172792.2172	83008.48339	0.480397812	-1.057706912	0.006492644	0.015450673
hsa-miR-199a-3p	346117.2456	166711.5987	0.481663711	-1.053906651	0.006796881	0.016090072
hsa-miR-1247-3p	43.43415521	18.21934941	0.432535497	-1.262472037	0.006990511	0.016428962
hsa-miR-143-5p	4196.637025	7491.754686	1.784993472	0.836087761	0.006989381	0.016428962
hsa-miR-4638-5p	11.43446813	3.245306935	0.341414437	-1.725517635	0.00703649	0.016477537
hsa-miR-887-5p	63.33679225	26.17092418	0.422323265	-1.24429142	0.007107289	0.016583673
hsa-miR-497-5p	332.2415259	810.5445582	2.435304411	1.286865767	0.007421731	0.017255525
hsa-let-7b-3p	483.581858	942.415525	1.946865136	0.96269916	0.007506511	0.017390529
hsa-miR-331-5p	303.7233366	163.3587023	0.53937025	-0.891972042	0.007880118	0.018191337
hsa-miR-193a-3p	13.51457685	36.69379334	2.596961229	1.454047601	0.007924083	0.01822819
hsa-miR-190b-5p	30.25630278	14.17623207	0.485541498	-1.139294053	0.008129014	0.018633761
hsa-miR-3664-3p	4.443339357	20.98559979	4.038991206	2.224130903	0.008253835	0.018853496
hsa-miR-126-3p	395162.5492	866967.5761	2.193948754	1.133531152	0.008514699	0.019339178
hsa-miR-17-3p	290.6431594	105.3951831	0.364812888	-1.459341065	0.008535107	0.019339178
hsa-miR-582-5p	65.25435208	185.9160302	2.821188712	1.501494218	0.008555581	0.019339178
hsa-miR-452-5p	1397.577631	3228.97276	2.30946977	1.208376346	0.008782351	0.019783082
hsa-miR-145-3p	4794.30981	9524.995006	1.98652337	0.990426666	0.00881794	0.019794755
hsa-miR-19b-1-5p	28.8438559	9.066659583	0.337310957	-1.622452575	0.008904742	0.019920919
hsa-miR-3117-3p	29.10899924	66.76601982	2.250689877	1.191404834	0.009135383	0.020366898
hsa-miR-122-5p	11.51833573	28.26792202	2.338004241	1.270017304	0.009754511	0.021599274
hsa-miR-299-5p	65.97356422	17.04869157	0.269489787	-1.946711159	0.009738905	0.021599274
hsa-miR-365a-5p	36.58742913	76.84783173	2.071113495	1.081954982	0.009799052	0.021624349
hsa-miR-320e	54.62580602	22.03596999	0.414123797	-1.288770888	0.009839336	0.02163989
hsa-miR-424-5p	4567.227019	1973.200356	0.432158986	1.066391759	0.009985608	0.021848313
hsa-miR-7-5p	23335.08111	11206.63918	0.480270836	-1.058167749	0.010001225	0.021848313
hsa-miR-4738-3p	6.124502625	1.868831687	0.402671153	-1.77555842	0.010529257	0.022924903
hsa-miR-30d-5p	376341.8431	689679.308	1.832585156	0.873882528	0.010638177	0.023084845
hsa-miR-92b-3p	6435.779695	3014.440086	0.468470296	-1.094101662	0.011240973	0.024311872
hsa-miR-1271-5p	782.0531754	422.4946834	0.540824936	-0.887463457	0.011555369	0.02490909
hsa-miR-379-5p	14864.65107	6090.613501	0.40977778	-1.287243004	0.012131533	0.026064778
hsa-miR-133a-5p	47.04165857	13.33380475	0.298361988	-1.805971081	0.012634693	0.027056531
hsa-miR-340-5p	16990.70951	10983.87069	0.646484139	-0.629508625	0.012688369	0.027082388
hsa-let-7a-2-3p	14.72457134	5.949187197	0.441931742	-1.289037101	0.01280494	0.027241882
hsa-miR-425-5p	4285.21957	2143.390411	0.500298777	-0.999345686	0.013165379	0.027917465
hsa-miR-769-3p	68.65041978	30.2297823	0.448378953	-1.167298115	0.013565961	0.028673509
hsa-miR-1260b	5096.252188	2281.57365	0.447804732	-1.159113053	0.013726593	0.028825846
hsa-miR-652-5p	22.41185982	51.91970737	2.260380328	1.20468809	0.013683792	0.028825846
hsa-miR-485-3p	299.8750573	118.5543186	0.397355366	-1.334008735	0.014296799	0.029926741
hsa-miR-126-5p	2544.152773	5281.402815	2.075475732	1.053843371	0.014382789	0.030010243
hsa-miR-6515-5p	42.9622127	16.46721492	0.397323379	-1.373452932	0.014711435	0.030597905
hsa-miR-1246	175.0221147	43.87637031	0.254947342	-1.995035358	0.014833766	0.030754082
hsa-miR-887-3p	148.0307022	45.8896195	0.314630602	-1.684920906	0.01602213	0.033112402
hsa-miR-3128	1.595611556	5.049457234	2.330648136	1.551507405	0.016678262	0.034359331
hsa-miR-92b-5p	218.3259717	84.05079641	0.387782604	-1.373292155	0.016907066	0.034720819
hsa-miR-450a-2-3p	160.2249807	60.55841364	0.381816846	-1.39929154	0.017073522	0.034952399
hsa-miR-193b-3p	139.744998	292.7490062	2.087100859	1.064512992	0.017227532	0.035157126
hsa-miR-504-5p	5693.232705	3412.940985	0.599543637	-0.738095266	0.017584751	0.035773978
hsa-miR-454-3p	1618.129692	910.3762725	0.562880341	-0.83031829	0.018160288	0.036829743
hsa-miR-337-3p	248.0396426	101.474362	0.411478112	-1.288352707	0.018290277	0.036978169
hsa-miR-135a-5p	4384.747504	2336.746682	0.533032666	1.168403517	0.019602333	0.039508108
hsa-miR-6866-5p	152.4371441	32.33419602	0.217249847	-0.84664247	0.020986049	0.042166413
hsa-miR-1260a	4569.591633	2157.392668	0.472234853	-1.08244886	0.021172864	0.042410875
hsa-let-7e-5p	61377.62047	39513.60667	0.643784536	-0.63533211	0.021785298	0.04350377
hsa-miR-3116	4.801745175	12.7170945	2.364304891	1.295552831	0.022095631	0.04398855
hsa-miR-3065-3p	19.89293575	57.94073529	2.821084408	1.545365159	0.022745197	0.045143668
hsa-miR-3615	2328.715348	1044.982714	0.44897447	-1.155408772	0.022941103	0.045394098
hsa-miR-656-3p	116.2541081	49.16951822	0.427870026	-1.239469477	0.023216629	0.045800076
hsa-miR-485-5p	351.4694213	168.5941957	0.481160025	-1.056945237	0.023682666	0.046578295
hsa-miR-363-5p	21.60856389	41.76612794	1.89158976	0.927606034	0.023989495	0.047039642
hsa-miR-3176	18.66663762	6.751376586	0.394138375	-1.479325248	0.02428656	0.047479131
hsa-miR-539-3p	53.17899107	24.84799356	0.477085177	-1.090849296	0.025287067	0.049287067
hsa-miR-3605-5p	54.58804684	23.79185284	0.445992515	-1.174817744	0.025555658	0.049661892
hsa-let-7i-5p	875823.384	486667.8844	0.555669485	-0.84770305	0.026666166	0.051665697
hsa-miR-676-3p	57.34437668	32.39431906	0.572365684	-0.852175963	0.027466808	0.053059027
hsa-miR-377-5p	51.85390829	21.33201504	0.422523438	-1.253965973	0.028119819	0.05415977
hsa-miR-3182	59.83371601	27.59634937	0.470074019	-1.162473949	0.028615398	0.054951693
hsa-miR-16-1-3p	32.60031767	13.56847957	0.433581602	-1.231934815	0.029113194	0.055743203
hsa-miR-3605-3p	336.230449	172.0137134	0.513042977	-0.961127998	0.029963007	0.057202105
hsa-miR-411-5p	4259.762202	2064.419674	0.484753567	-1.045066058	0.031447232	0.059860082
hsa-miR-338-3p	93.3740011	193.2993746	2.058823112	1.056453062	0.031565293	0.059909638
hsa-miR-323b-3p	1215.113193	147.1490248	0.12182174	-1.354685265	0.033843463	0.064046787
hsa-miR-210-3p	6185.198297	6448.372348	1.04254213	1.12319985	0.035091734	0.066216577
hsa-miR-493-3p	4153.274115	2120.350395	0.510642855	-0.969847941	0.035451682	0.066702442
hsa-let-7f-1-3p	214.0912651	380.7552602	1.774852456	0.829876933	0.036018102	0.067572866
hsa-miR-1291	274.2696619	115.395797	0.422842809	-1.246245708	0.036258992	0.067829321
hsa-miR-195-3p	729.9133726	1689.410465	2.312737088	1.210975896	0.038407386	0.071642431
hsa-miR-181c-5p	526.0881435	259.4557145	0.494140719	-1.018330331	0.040758316	0.075810467
hsa-miR-299-3p	85.49886409	33.89897047	0.403461604	-1.328040884	0.041816318	0.07755676
hsa-miR-4750-5p	13.82410901	5.438203771	0.434306289	-1.352688479	0.042084467	0.077832353
hsa-miR-32-5p	3141.427864	5103.01026	1.624225115	0.699603997	0.042617851	0.078595527
hsa-miR-23b-5p	599.8547714	326.1201543	0.544424659	-0.876843054	0.043266765	0.079566847
hsa-miR-375-3p	99.95974468	246.2773349	2.449266643	1.300963512	0.043947088	0.08027893
hsa-miR-5001-3p	26.46596845	14.39166815	0.560390513	-0.879296498	0.04402393	0.08027893
hsa-miR-99a-3p	64.10799991	153.1789323	2.368048972	1.249855035	0.043829533	0.08027893
hsa-miR-665	14.05804993	6.027062694	0.466664855	-1.188011499	0.044762217	0.081397215
hsa-miR-369-5p	299.170165	153.9919098	0.516346819	-0.954951023	0.046156434	0.083587199
hsa-miR-4796-5p	9.568581534	24.4572616	2.408768056	1.345667764	0.046223336	0.083587199
hsa-miR-19a-3p	2397.821852	1350.998382	0.563609332	-0.827496775	0.046448363	0.083761452
hsa-miR-365b-5p	15.57994755	29.38891261	1.832871456	0.946256308	0.047822703	0.086001601
hsa-miR-224-3p	20.48459606	42.66396013	2.03233796	1.077647731	0.048314207	0.086408102
hsa-miR-1306-5p	96.06838465	50.1936326	0.527397595	-0.926538576	0.048302774	0.086408102
hsa-miR-653-3p	35.37890535	100.1872294	2.781480872	1.494881018	0.048739382	0.08669218
hsa-miR-1298-5p	533.9061533	31.54027265	0.060833611	-2.063466762	0.048690053	0.08669218
hsa-miR-106a-3p	6.770601194	18.40561567	2.497312008	1.381592174	0.049239065	0.08734232
hsa-miR-1180-3p	3113.986371	1792.571332	0.575787859	-0.796591407	0.049911431	0.088294406
hsa-miR-6882-5p	43.48006243	20.35818663	0.480174385	-1.091633725	0.052486055	0.092597349
hsa-miR-33a-5p	21.64342295	41.42544796	1.873632271	0.91219258	0.053279628	0.093743345
hsa-miR-197-5p	5.916084828	2.146522484	0.454957185	-1.398474216	0.053946501	0.094660841
hsa-miR-150-3p	14.88777997	34.31872672	2.223012075	1.210360727	0.054653177	0.09564306
hsa-miR-6501-5p	17.39779642	36.72347098	2.0504342	1.093589217	0.056916158	0.099296755
hsa-miR-361-5p	3713.467926	2675.265986	0.720497805	-0.472904276	0.057046062	0.099296755
hsa-miR-4442	40.51062617	17.29571573	0.440747766	-1.19453451	0.057297656	0.099468731
hsa-miR-125a-5p	272012.966	141787.7001	0.521255222	-0.939938747	0.058862331	0.101913239
hsa-miR-664a-5p	1083.979035	477.8585552	0.441352819	-1.18136256	0.059934564	0.103494433
hsa-miR-6516-3p	93.7251444	9.912733489	0.11520419	-1.106046527	0.060243182	0.103752147
hsa-miR-369-3p	410.1499563	229.2106005	0.559918825	-0.840193152	0.060773129	0.104388673
hsa-miR-10527-5p	54.93778471	31.11573188	0.574133067	-0.836213682	0.062552393	0.107162126
hsa-miR-589-5p	268.1401851	389.078663	1.449351247	0.534133706	0.063666913	0.108785199
hsa-miR-222-5p	9.428290922	24.3087908	2.426935631	1.372336312	0.063971203	0.109018987
hsa-miR-101-3p	102654.1387	183039.8271	1.783065411	0.834364632	0.06492695	0.110358862
hsa-miR-199a-5p	79928.94623	56663.73926	0.708930031	-0.496278149	0.065454081	0.110965122
hsa-miR-130a-3p	3817.35276	2329.668442	0.610385836	-0.712215595	0.066857942	0.112786857
hsa-miR-127-3p	64139.32587	37556.71647	0.585555436	-0.772132817	0.066875157	0.112786857
hsa-miR-885-5p	2.891415165	8.255412218	2.378418089	1.509048689	0.067838173	0.114115376
hsa-miR-641	122.3469274	68.38964434	0.562556732	-0.839259786	0.070133978	0.117673247
hsa-miR-320d	331.2685618	187.7927487	0.568193234	-0.815701547	0.070456288	0.117910137
hsa-miR-503-5p	3506.214054	1346.194194	0.384120893	-0.498298648	0.072062409	0.12028879
hsa-miR-10395-3p	200.0400728	103.194852	0.51827902	-0.958531013	0.074325761	0.123749541
hsa-miR-4645-3p	26.75065397	11.87758226	0.464046083	-1.145106163	0.077044794	0.12794939
hsa-miR-27a-5p	2808.526358	5360.388779	1.908289191	0.932621196	0.078768193	0.13047861
hsa-miR-33a-3p	10.69978968	20.99009329	1.879528939	0.907865567	0.080233804	0.132569052
hsa-miR-581	18.76258433	30.95128313	1.616756321	0.735708076	0.08256338	0.135729194
hsa-miR-376c-3p	185.4039489	97.35514086	0.527645157	-0.928551558	0.082377546	0.135729194
hsa-miR-191-5p	68496.42056	46912.94533	0.684900905	-0.546006687	0.08369821	0.137248198
hsa-miR-30b-3p	197.1073269	313.0060611	1.585030024	0.670634309	0.090261047	0.147268024
hsa-miR-193b-5p	33.08737635	59.18025084	1.765470308	0.840960452	0.090130162	0.147268024
hsa-miR-151a-3p	134040.8	182628.4847	1.362481589	0.4462286	0.094830021	0.15433586
hsa-miR-154-3p	16.81693339	9.443969142	0.586182196	-0.849017552	0.095259522	0.154648251
hsa-miR-134-5p	3182.597403	1832.195458	0.575825152	-0.796671367	0.095514875	0.154677074
hsa-miR-5701	19.39540118	32.50633375	1.642837689	0.751151032	0.096146806	0.155314071
hsa-miR-4999-5p	51.84941576	23.91197907	0.471376622	-1.107113974	0.097300199	0.156788191
hsa-miR-629-5p	2025.334384	1498.228352	0.739872138	0.627733909	0.098142156	0.157529611
hsa-miR-34c-5p	422.0803993	206.5340541	0.490531007	-1.02926861	0.098244273	0.157529611
hsa-miR-16-5p	10232.82573	6916.646891	0.675959028	-0.565126915	0.098493808	0.157541692
hsa-miR-6716-3p	89.06141335	46.71060458	0.529756339	-0.917841858	0.099912324	0.159418928
hsa-miR-3611	4.779846069	8.912250875	1.714967969	0.890247062	0.102896501	0.163779028
hsa-miR-3913-5p	660.3349734	212.6859081	0.323112971	-0.54289063	0.103198512	0.163859101
hsa-miR-664a-3p	711.5218019	547.7733075	0.770184584	0.781764601	0.106750302	0.169086244
hsa-miR-942-5p	24.89001516	14.50525315	0.598889303	-0.782449129	0.111353454	0.175949269
hsa-miR-2116-3p	19.95597254	31.91178845	1.57052069	0.699592055	0.111852343	0.176309625
hsa-miR-561-5p	5.880774144	15.28559871	2.366826518	1.391770578	0.11607059	0.182516797
hsa-miR-409-3p	5027.435822	2991.039913	0.595023983	-0.748997931	0.116740395	0.183127704
hsa-miR-129-5p	519.1354208	1141.864341	2.197243824	1.138833714	0.117099836	0.183249984
hsa-miR-598-3p	908.7213784	621.4309443	0.684199535	-0.549147762	0.119254043	0.186173577
hsa-miR-214-3p	10783.59478	6646.475394	0.6163862	-0.698177849	0.121422783	0.189105817
hsa-miR-221-3p	31873.97264	21552.11594	0.676176767	-0.564522439	0.122056492	0.189353986
hsa-miR-1343-3p	28.94780314	17.2743671	0.610207267	-0.718404905	0.122163862	0.189353986
hsa-miR-5680	14.18672911	7.45065498	0.556449971	-0.8319213	0.123122488	0.190386554
hsa-miR-548q	20.36495207	11.4979639	0.58497505	-0.802225167	0.123825937	0.191020581
hsa-miR-1287-5p	895.1049912	269.3926141	0.301742114	-0.632269437	0.128175857	0.197263552
hsa-miR-671-5p	455.0123329	277.4305894	0.610576884	-0.712597376	0.130278001	0.200025893
hsa-miR-9903	44.57783978	29.50044107	0.66919453	-0.617453256	0.131633272	0.201631201
hsa-miR-148a-3p	1417971.144	2222756.241	1.567560583	0.648519414	0.134966772	0.206252039
hsa-miR-450a-5p	5280.126697	4087.973511	0.774261582	0.511571085	0.136439154	0.208013792
hsa-miR-27b-5p	2869.710353	1980.536618	0.690260031	-0.534865304	0.137659061	0.209383291
hsa-miR-874-5p	6.397825471	11.08701181	1.633860093	0.785307711	0.142198811	0.215784209
hsa-miR-6892-5p	11.23716087	6.005646949	0.572489569	-0.88931451	0.144734527	0.219121342
hsa-let-7a-5p	701371.1698	487326.6761	0.694820378	-0.525290492	0.146318654	0.221005669
hsa-miR-450a-1-3p	37.78774296	24.89691984	0.667657303	-0.613262783	0.149101673	0.224687938
hsa-miR-3178	12.67655939	8.593733281	0.701472717	-0.652852497	0.158809608	0.237988854
hsa-miR-155-5p	4893.081397	3182.47052	0.650473554	-0.620679641	0.158831178	0.237988854
hsa-miR-1304-3p	52.15382736	34.99253134	0.677139035	-0.582964826	0.159024811	0.237988854
hsa-miR-196b-3p	21.21515331	12.11739268	0.5904705	-0.833146449	0.161038753	0.240450064
hsa-miR-1249-3p	9.825791535	14.70262885	1.45048321	0.639365067	0.163703397	0.243869363
hsa-miR-3940-3p	22.29716926	12.79977755	0.592337094	-0.760482657	0.166553482	0.247397359
hsa-miR-1250-5p	78.13850324	22.51514649	0.297139136	-0.698381704	0.166831706	0.247397359
hsa-miR-28-5p	2031.015823	2668.497716	1.313718961	0.393857534	0.16809845	0.248709297
hsa-miR-361-3p	9317.397202	11531.72308	1.23762948	0.30766564	0.1700991	0.250626514
hsa-miR-195-5p	2653.00736	4575.8904	1.724520613	0.786425247	0.170164238	0.250626514
hsa-miR-1277-3p	18.27178887	27.23635177	1.465165064	0.571990078	0.182029502	0.267497078
hsa-miR-941	6596.544641	5039.224406	0.763954574	-0.388477501	0.184619742	0.270692459
hsa-miR-127-5p	726.6143902	482.4055582	0.66437053	-0.591629461	0.19006559	0.278051009
hsa-miR-1295a	42.87245436	23.17523265	0.551034425	-0.887024494	0.190597314	0.278203703
hsa-miR-20b-5p	1476.074663	2025.629431	1.372056187	0.455980066	0.193697223	0.282095956
hsa-let-7f-2-3p	205.4838989	294.0139976	1.428750615	0.51204829	0.197780502	0.287399792
hsa-miR-28-3p	15142.76184	19755.2985	1.304583281	0.383576387	0.202396664	0.292800507
hsa-miR-550a-5p	64.02435603	44.05872362	0.692951478	-0.540603904	0.202108456	0.292800507
hsa-miR-377-3p	44.20914311	28.75873155	0.658245866	-0.610609506	0.20665347	0.298295807
hsa-miR-147b-3p	25.83175052	43.25565961	1.649376532	0.742252212	0.207483755	0.298831692
hsa-miR-2110	337.4112104	227.9475836	0.676536641	-0.564460409	0.208358552	0.299429177
hsa-miR-338-5p	303.1617523	405.6501738	1.336953679	0.42002806	0.216374234	0.310263495
hsa-let-7g-3p	22.28211586	34.26752851	1.514790525	0.586063957	0.226358794	0.323867198
hsa-miR-125b-5p	130428.9169	92835.08329	0.711769857	-0.490516353	0.232096867	0.331348817
hsa-miR-185-3p	152.8558408	194.6510657	1.271651858	0.348587555	0.233275131	0.332302211
hsa-miR-651-5p	561.5037175	366.6450901	0.653586952	-0.616438665	0.238687826	0.339270251
hsa-miR-100-5p	361669.5615	254209.6852	0.702879118	-0.50865642	0.239566577	0.339777432
hsa-miR-576-5p	148.8387901	109.3811754	0.736666222	-0.441328442	0.243948413	0.345240037
hsa-miR-146b-5p	185684.2586	125676.0515	0.676828373	-0.563139789	0.246267857	0.34776654
hsa-miR-144-5p	800.6947376	452.0479523	0.565112793	-0.824821963	0.247943944	0.349375558
hsa-miR-9983-3p	63.33591823	102.2229482	1.604437319	0.687385452	0.249095693	0.35024038
hsa-miR-1248	59.41368364	38.0670897	0.64665962	-0.62910099	0.251292128	0.352567188
hsa-miR-4709-3p	12.49421597	19.20311653	1.497168607	0.65116246	0.252226262	0.353116767
hsa-miR-136-3p	918.9315751	647.2981063	0.704724268	-0.506206712	0.260741993	0.364255445
hsa-miR-652-3p	1721.141245	2339.245748	1.358916265	0.442354198	0.261909671	0.365103203
hsa-miR-19b-3p	3535.077807	2519.523862	0.71280215	-0.488483962	0.265645338	0.368731589
hsa-miR-1307-5p	412.0661173	636.2313751	1.542686142	0.625877269	0.265558253	0.368731589
hsa-miR-148b-3p	81132.79716	58896.4602	0.725930035	-0.46210865	0.269794425	0.37369398
hsa-miR-30c-1-3p	253.8848477	356.1097611	1.401063125	0.488692236	0.27086165	0.374082646
hsa-miR-576-3p	24.78288121	16.85241797	0.692413614	-0.55782746	0.271224284	0.374082646
hsa-miR-4683	56.26730434	84.83651932	1.4988748	0.59953749	0.274814456	0.377315295
hsa-miR-3158-3p	609.90344	445.2340775	0.730449443	-0.45410199	0.275306859	0.377315295
hsa-miR-330-5p	544.4393738	288.720865	0.531169693	0.309552335	0.27462982	0.377315295
hsa-miR-222-3p	15985.82364	12093.80406	0.756548288	-0.402439623	0.276124459	0.377640804
hsa-miR-296-5p	46.11333228	29.31136691	0.643371323	-0.649720842	0.277903993	0.379277777
hsa-miR-193a-5p	827.732175	1130.40682	1.365226129	0.450397905	0.283022226	0.38535101
hsa-miR-1827	2.359096248	3.731687917	1.408619333	0.629816803	0.28353784	0.38535101
hsa-miR-10a-5p	1319535.934	964395.8843	0.730860092	-0.452335238	0.28864222	0.39147101
hsa-miR-224-5p	2001.903603	1332.148622	0.66560798	-0.587156882	0.294691184	0.398016516
hsa-miR-210-5p	29.73428073	46.71160955	1.552390634	0.658928855	0.294453138	0.398016516
hsa-miR-556-5p	41.70110752	29.25560642	0.708543833	-0.512423517	0.298381906	0.402166917
hsa-miR-6842-3p	122.7501004	182.1766225	1.48021393	0.576615725	0.300190751	0.403768964
hsa-miR-103a-2-5p	7.690342553	11.26451819	1.411281329	0.523900283	0.305152489	0.409596434
hsa-miR-136-5p	635.2626655	456.0956566	0.718407163	-0.477117821	0.307641274	0.41124121
hsa-miR-23c	77.70340523	61.00437735	0.787823312	-0.335293118	0.307640091	0.41124121
hsa-miR-1468-5p	136.1578348	202.3789597	1.48280964	0.570772304	0.317308852	0.42329521
hsa-miR-423-5p	11967.87585	9054.207494	0.756562906	-0.40243874	0.323232653	0.430315864
hsa-miR-450b-5p	3778.984752	2791.201824	0.738680711	-0.43736266	0.326416283	0.433667347
hsa-miR-664b-5p	40.48304211	21.38443445	0.539604458	0.590223594	0.329588261	0.435297593
hsa-miR-98-5p	20610.1099	15926.17004	0.77274684	-0.372032245	0.32964933	0.435297593
hsa-miR-5091	158.314889	110.1065475	0.697402159	-0.516482578	0.329551038	0.435297593
hsa-miR-150-5p	1596.903851	2429.070805	1.520786625	0.605176996	0.352779081	0.464897129
hsa-miR-23a-3p	24932.64511	31196.6139	1.251225553	0.323385988	0.360478591	0.474083965
hsa-miR-26b-3p	136.9571343	163.5200936	1.192545021	0.255350031	0.361738292	0.474781508
hsa-miR-3065-5p	98.02425835	142.7759418	1.451926469	0.538430864	0.363282314	0.475848665
hsa-miR-10399-3p	243.5652771	326.9652349	1.341013078	0.426494406	0.368149054	0.48029065
hsa-miR-4497	99.59522329	74.65780817	0.752101399	-0.413696557	0.36753821	0.48029065
hsa-miR-5100	92.06860801	119.8606118	1.298618453	0.388635354	0.371572144	0.482821289
hsa-miR-1247-5p	26.00101583	17.18512169	0.673497686	-0.592248091	0.37113457	0.482821289
hsa-miR-659-5p	128.2655907	97.32876909	0.760672415	-0.387957398	0.381407413	0.494613996
hsa-miR-374a-5p	6533.120287	5427.171446	0.830742504	-0.267746419	0.383718173	0.496621334
hsa-miR-95-5p	5.476615375	9.420233147	1.60890103	0.742922546	0.386391952	0.499089604
hsa-miR-628-5p	200.662278	165.7320956	0.826788715	-0.280878208	0.387784116	0.49989596
hsa-miR-324-5p	450.1863423	345.4653092	0.767898486	-0.382688452	0.390179922	0.501990374
hsa-miR-1262	16.85483933	23.14694189	1.352403202	0.416001514	0.391010193	0.502066343
hsa-miR-892a	13.7787172	35.32681658	2.458049375	1.37094208	0.39770019	0.509651228
hsa-miR-27a-3p	70602.53672	89502.32602	1.267688988	0.342209129	0.404166665	0.513891599
hsa-miR-1307-3p	12145.76042	9728.103868	0.800962852	-0.320160015	0.403814575	0.513891599
hsa-miR-330-3p	2254.365642	676.97149	0.300603803	-0.286911709	0.40235748	0.513891599
hsa-miR-10392-5p	2.988175738	3.866074259	1.220125335	0.486094647	0.402644889	0.513891599
hsa-miR-21-5p	854988.3821	1150329.832	1.345432886	0.428068181	0.406009618	0.515228579
hsa-miR-675-3p	85.90653795	136.6563028	1.583957962	0.66882848	0.413366845	0.523141975
hsa-miR-624-5p	10.60448739	9.097621781	0.870148025	-0.335034808	0.413852714	0.523141975
hsa-miR-142-5p	7544.644403	5454.682335	0.723024045	-0.467972804	0.417961519	0.527311917
hsa-miR-4662a-5p	70.18312162	94.53866052	1.342153285	0.427182565	0.419654287	0.528423483
hsa-miR-499a-5p	3767.967541	751.3220076	0.199609575	0.373145655	0.421022922	0.529123403
hsa-miR-98-3p	97.91692949	127.7399065	1.301495175	0.373822847	0.424951899	0.533032151
hsa-miR-296-3p	827.0476288	130.735474	0.159091663	0.467381072	0.427399309	0.535071058
hsa-let-7d-3p	3933.182323	3370.763625	0.857043052	-0.222518373	0.430362955	0.537747186
hsa-miR-24-3p	122945.7134	104124.1296	0.846912672	-0.239706394	0.436185156	0.54397804
hsa-miR-6806-3p	13.79278483	9.616185009	0.717659665	-0.479820417	0.441239322	0.549229061
hsa-miR-221-5p	2374.86748	2844.575479	1.197699578	0.260217324	0.442208626	0.549385144
hsa-let-7b-5p	150924.608	189993.6699	1.258863041	0.332120987	0.444581056	0.551280509
hsa-miR-23b-3p	78753.2463	67679.44957	0.859387941	-0.218614787	0.454243754	0.562191414
hsa-miR-133a-3p	678.7698087	196.2206428	0.29012857	-0.366470149	0.457655321	0.565338926
hsa-miR-146a-5p	34366.26441	25747.86006	0.74922635	-0.416560287	0.460349488	0.567589993
hsa-miR-214-5p	3769.187467	3167.719777	0.840467432	-0.250940457	0.46169375	0.568171326
hsa-miR-425-3p	741.4298665	630.114272	0.850065845	-0.235585116	0.468571318	0.575547034
hsa-miR-374c-5p	36.77208831	28.76200509	0.787936448	-0.370502929	0.475314188	0.581634466
hsa-miR-154-5p	61.74627276	49.94963549	0.811994613	-0.302492511	0.4746301	0.581634466
hsa-miR-212-5p	527.3412796	434.436062	0.824156807	-0.27885053	0.477003912	0.58260703
hsa-miR-10399-5p	66.77045009	87.52175268	1.306199864	0.393007779	0.479073069	0.582946856
hsa-miR-5010-3p	252.5312917	195.35931	0.774497336	-0.365860435	0.478710251	0.582946856
hsa-miR-769-5p	3525.918629	2941.033986	0.834165541	-0.261781748	0.491787726	0.597301884
hsa-miR-625-3p	522.0736999	413.7341319	0.792878961	-0.336041949	0.492974662	0.597628501
hsa-miR-4485-3p	12.20751821	9.056413079	0.761415803	-0.411557571	0.496385015	0.600644321
hsa-miR-590-3p	108.8054412	132.0767897	1.211932563	0.268703681	0.537981902	0.649770349
hsa-miR-107	5404.427909	4718.115803	0.873032789	-0.196040326	0.540746069	0.651899427
hsa-miR-125b-2-3p	3631.446636	4521.667042	1.2450746	0.31626113	0.543877469	0.654462537
hsa-miR-152-5p	128.2776191	105.8632448	0.826618292	-0.273012807	0.545840192	0.65534393
hsa-miR-3690	31.25152156	23.07601665	0.746507931	-0.426281051	0.546623278	0.65534393
hsa-miR-197-3p	2310.576394	2082.082903	0.901152524	-0.149781766	0.550533314	0.657917518
hsa-miR-4521	43.89915378	35.47966739	0.812480065	-0.295458515	0.550791164	0.657917518
hsa-miR-4709-5p	31.04180116	40.56127708	1.29709553	0.396330121	0.552826398	0.659139167
hsa-miR-337-5p	69.27746802	56.91495412	0.824089936	-0.287462083	0.56127019	0.667983352
hsa-miR-505-3p	1090.781054	940.9268709	0.862743375	-0.212754443	0.564834436	0.670998573
hsa-let-7f-5p	1211956.089	1031601.424	0.851187252	-0.232453953	0.575639823	0.68011166
hsa-miR-4677-3p	76.42209601	85.3543963	1.11537146	0.147330806	0.574073023	0.68011166
hsa-miR-6502-5p	8.176571257	9.845306043	1.181847309	0.320957086	0.57473675	0.68011166
hsa-miR-542-3p	8710.508221	7485.962931	0.859433607	-0.218652999	0.584962888	0.68987471
hsa-miR-874-3p	894.2240755	1055.527344	1.180182005	0.239096633	0.591797005	0.696672424
hsa-miR-331-3p	1619.132984	1375.026577	0.849329401	-0.235511714	0.593960747	0.696699903
hsa-miR-185-5p	8258.158358	9192.417512	1.113117961	0.154674261	0.593298711	0.696699903
hsa-miR-491-5p	91.32036767	53.78634474	0.593437246	0.230048719	0.598100367	0.699036515
hsa-miR-7704	358.8633819	309.3773134	0.862486513	-0.2129973	0.598081932	0.699036515
hsa-miR-148b-5p	815.6073406	732.922598	0.898746021	-0.153599917	0.600467125	0.700544979
hsa-miR-374b-5p	11401.04767	10002.13099	0.877310049	-0.188940505	0.606296378	0.706080397
hsa-miR-1297	5.66222533	4.733746679	0.860635358	-0.361196356	0.608747844	0.707669369
hsa-miR-579-5p	7.132792519	8.338662349	1.148272543	0.244769124	0.613929551	0.712420923
hsa-miR-3613-5p	468.6019286	406.6881805	0.868156955	-0.207303035	0.620629052	0.718913724
hsa-miR-152-3p	88178.74564	77030.15976	0.873569766	-0.195005332	0.624157196	0.721716403
hsa-miR-99a-5p	726301.5192	876981.1857	1.207461302	0.271973835	0.626846221	0.723540585
hsa-miR-9985	390.8345934	441.3519769	1.128925277	0.174828164	0.629014447	0.724758239
hsa-miR-135a-2-3p	1208.406198	972.8839762	0.805257967	-0.313191896	0.639988601	0.736099964
hsa-miR-27b-3p	568819.1224	627201.5944	1.102637846	0.140957244	0.645184651	0.740767562
hsa-miR-26a-1-3p	14.91948532	16.58093823	1.104365994	0.183984368	0.646639847	0.741131233
hsa-miR-1273c	11.12449398	9.144175992	0.836667989	-0.239398	0.650390302	0.741453449
hsa-miR-6733-5p	24.13215604	28.12872539	1.159022144	0.210357818	0.648827003	0.741453449
hsa-let-7c-5p	74720.9043	64468.45976	0.86279198	-0.212925588	0.651476763	0.741453449
hsa-miR-142-3p	1867.256093	2239.234708	1.199104724	0.26217318	0.649284406	0.741453449
hsa-let-7c-3p	168.0030919	138.0981682	0.823051026	-0.28292343	0.655329187	0.744536301
hsa-miR-7-1-3p	82.81997864	75.17682829	0.908814695	-0.144926567	0.657262745	0.745432138
hsa-miR-95-3p	4480.916225	5180.417035	1.156071817	0.209083346	0.666894183	0.753975982
hsa-miR-584-5p	109.2018909	94.60666288	0.867559187	-0.202341317	0.66711239	0.753975982
hsa-miR-151a-5p	1202.708398	1317.86424	1.095667557	0.131912163	0.670498098	0.756489189
hsa-miR-324-3p	481.1093835	432.5237879	0.899222879	-0.155076443	0.678653472	0.763496806
hsa-miR-223-3p	592.6083364	705.2336159	1.189729949	0.25044807	0.679054763	0.763496806
hsa-miR-326	220.8711539	252.2509824	1.141432664	0.195796583	0.693878596	0.778818907
hsa-miR-1251-5p	56.11595637	67.61893546	1.201396944	0.256940696	0.699544422	0.783826882
hsa-let-7g-5p	571265.5518	522306.2872	0.914296987	-0.129267277	0.705130822	0.788728806
hsa-miR-151b	139.9148055	154.6926933	1.104871079	0.145598906	0.710504189	0.793376033
hsa-miR-1-3p	65387.05154	19925.67024	0.304744824	-0.155282634	0.724484492	0.806553867
hsa-miR-32-3p	191.3110133	172.358579	0.901449044	-0.154349917	0.724783429	0.806553867
hsa-miR-24-2-5p	2406.426662	2664.020852	1.106999808	0.147217654	0.728766137	0.809601971
hsa-let-7i-3p	162.3706931	176.7209508	1.087838629	0.127149415	0.734307409	0.813931872
hsa-miR-144-3p	1610.799972	1362.747593	0.846102256	-0.241204323	0.735164272	0.813931872
hsa-miR-6761-5p	16.36077173	18.23967715	1.108227068	0.16221707	0.737353474	0.814969629
hsa-miR-223-5p	412.9585976	358.4062719	0.868217918	-0.204833613	0.739563726	0.816027095
hsa-miR-423-3p	53012.80742	49181.82756	0.927736187	-0.108194189	0.744166214	0.818880231
hsa-miR-451a	73462.18445	63446.29427	0.863661094	-0.211466181	0.744893237	0.818880231
hsa-miR-539-5p	80.86691632	71.64721127	0.887381796	-0.169332857	0.74592316	0.818880231
hsa-miR-548k	74.59010585	68.55107299	0.920108157	-0.120861935	0.760999182	0.834024356
hsa-miR-148a-5p	2491.512202	2254.100142	0.904749891	-0.144528873	0.764612891	0.834659302
hsa-miR-548o-3p	218.8785549	205.4908379	0.93911313	-0.095774511	0.763346292	0.834659302
hsa-miR-486-5p	7075.708464	6288.303065	0.888732819	-0.170223323	0.76542489	0.834659302
hsa-miR-328-3p	4601.109869	4947.700758	1.075311303	0.105058782	0.774190283	0.84280581
hsa-miR-671-3p	473.511283	514.2211274	1.085793206	0.11953596	0.780427	0.846791286
hsa-miR-106a-5p	1155.437837	1239.597608	1.072775006	0.101323107	0.780452799	0.846791286
hsa-miR-7976	14.80273817	15.53177055	1.046133295	0.116314919	0.791357822	0.854822479
hsa-miR-339-5p	603.9841845	644.7113011	1.067319308	0.09343335	0.789663391	0.854822479
hsa-miR-10b-3p	6762.454024	3893.069188	0.575751557	0.080355139	0.792776129	0.854822479
hsa-miR-585-3p	631.3663992	694.6401243	1.100058645	0.137030004	0.793107185	0.854822479
hsa-miR-6130	36.43116853	39.34173664	1.077757875	0.115391241	0.796598563	0.855751922
hsa-miR-1275	312.2197761	286.0501382	0.916449599	-0.12409351	0.795449301	0.855751922
hsa-miR-26a-5p	1140976.237	1075746.428	0.942829877	-0.084931235	0.798348686	0.856219101
hsa-miR-6503-3p	78.31607535	69.7667855	0.892212394	-0.163946039	0.801541861	0.858229854
hsa-miR-4791	1352.43847	1230.696435	0.910049819	-0.136235079	0.805570562	0.861127153
hsa-miR-186-5p	7310.692777	7757.457671	1.061102799	0.085591228	0.809354388	0.863753618
hsa-miR-4473	71.03662199	76.01447781	1.069101739	0.095711302	0.813257383	0.866498456
hsa-miR-548ba	1681.324745	91.79175817	0.055156865	-0.16248266	0.815192458	0.867140997
hsa-miR-424-3p	8704.302626	2401.844722	0.276020815	0.086259074	0.821260786	0.870750443
hsa-miR-548e-3p	72.78347601	69.86666044	0.960467902	-0.067782519	0.820698403	0.870750443
hsa-miR-374a-3p	2831.563192	3003.859681	1.060827059	0.084966345	0.829239491	0.877780339
hsa-miR-3909	327.8783623	346.9839402	1.058093144	0.08337316	0.837072033	0.884632944
hsa-miR-26a-2-3p	95.07642347	100.1740903	1.053058457	0.078977914	0.84828537	0.895030431
hsa-miR-1270	29.07822167	32.35468804	1.108931519	0.147535378	0.853172725	0.898730492
hsa-miR-212-3p	81.98022356	77.97420219	0.951723179	-0.067828669	0.860245068	0.904716542
hsa-miR-15a-5p	323.0725219	312.9356768	0.968720442	-0.046269739	0.873761536	0.917449613
hsa-miR-542-5p	47.84223728	45.33358906	0.948637729	-0.080606883	0.877512789	0.919904711
hsa-miR-4510	24.72641789	25.85709246	1.043949942	0.082122709	0.884441152	0.925677154
hsa-miR-132-5p	1323.862295	1372.283906	1.036548411	0.052900804	0.88644845	0.92628883
hsa-miR-4679	36.79144933	40.9545257	1.110159214	0.154486048	0.891073237	0.928157314
hsa-miR-24-1-5p	1315.2589	1265.079125	0.961876972	-0.055868854	0.891088052	0.928157314
hsa-miR-664b-3p	43.31439597	40.34058403	0.93289287	-0.087119653	0.901940339	0.93796032
hsa-miR-888-5p	18.27895793	20.68701843	1.124906154	0.18784301	0.903708778	0.938300501
hsa-miR-10b-5p	1812526.672	1883655.095	1.039242669	0.055530319	0.911945069	0.943841399
hsa-miR-5699-5p	17.39515869	18.04634409	1.035399825	0.054358054	0.910927581	0.943841399
hsa-miR-146b-3p	2356.243209	2435.432151	1.033593878	0.047908438	0.915844278	0.94637242
hsa-miR-3934-5p	21.43235369	21.01093108	0.981213625	-0.04321649	0.937618881	0.967337387
hsa-miR-551b-3p	17.43581042	16.69115352	0.959608128	-0.034776304	0.9409288	0.968621555
hsa-miR-339-3p	2077.321041	2126.270061	1.023552194	0.033707633	0.941839392	0.968621555
hsa-miR-3124-5p	10.56626044	10.88368549	1.027444052	-0.030133199	0.949124845	0.969681686
hsa-miR-132-3p	2103.726005	2076.022684	0.986837564	-0.018912559	0.950317843	0.969681686
hsa-miR-3199	17.02039234	16.33993592	0.962239645	-0.040548067	0.946383838	0.969681686
hsa-miR-4508	52.52762825	53.35011082	1.015365571	0.031984253	0.947010997	0.969681686
hsa-miR-4488	11.89989736	11.90699516	1.000550221	-0.028689253	0.949409107	0.969681686
hsa-miR-625-5p	18.06069669	17.42551047	0.966675603	-0.029742494	0.951928977	0.969805578
hsa-miR-574-3p	2916.351154	2955.153257	1.013300457	0.019079979	0.955465427	0.971887489
hsa-miR-3613-3p	7.116581156	7.392998077	1.034055832	0.025338201	0.958939678	0.973899735
hsa-miR-577	259.4674588	253.3863508	0.976653099	-0.033907089	0.961063553	0.974536407
hsa-miR-511-5p	670.6970026	658.9834101	0.982561196	-0.024657794	0.963865222	0.975857324
hsa-miR-3074-5p	66.56052405	67.42005378	1.012722366	0.0160558	0.970255349	0.977765065
hsa-miR-26b-5p	130104.1029	128700.6659	0.989213052	-0.015652933	0.967775196	0.977765065
hsa-miR-511-3p	27.28182034	26.64922082	0.977632291	-0.021583898	0.969951287	0.977765065
hsa-miR-101-5p	13.87428667	14.11919141	1.016464974	0.022098122	0.976234268	0.982269719
hsa-miR-1278	96.6318361	97.56787886	1.009587475	0.00917262	0.979496871	0.984031578
hsa-miR-505-5p	41.43152629	40.87035312	0.986774617	-0.007369922	0.984678921	0.98771337
hsa-let-7a-3p	3264.437473	3255.259777	0.997189444	-0.003941763	0.991949598	0.993475675
hsa-miR-1277-5p	40.68927721	41.0932306	1.009689623	0.002919825	0.993725474	0.993725474
