# Supplementary material for: Integrative Transcriptomic Profiling of the Wilms Tumor
Source: Cancers (Basel). 2023 Jul 28;15(15):3846. doi: 10.3390/cancers15153846 (PMC10416970; doi:10.3390/cancers15153846)
Supplement: Supplementary file 1 [file cancers-15-03846-s001.zip › Supplementary Table S4c.csv]

INTEGRATIVE TRANSCRIPTOMIC PROFILING OF WILMS TUMOR
Supplementary Table S4c: FFPE DESeq2 differential expression results.
name	mean_Normal	mean_Tumor	FoldChange	log2FoldChange	pvalue	padj
hsa-miR-206	293.4342394	12925.52409	43.90292419	5.465303649	3.14E-20	1.17E-17
hsa-miR-215-5p	450.0316428	43.92981337	0.099615657	-3.354013382	4.60E-19	8.55E-17
hsa-miR-194-5p	12422.23301	1182.670074	0.095278747	-3.392599683	6.58E-18	8.16E-16
hsa-miR-29c-3p	1055.320673	277.0462005	0.263221394	-1.93048302	5.45E-17	4.64E-15
hsa-miR-126-3p	78929.01933	32424.29524	0.410810684	-1.283468967	6.59E-17	4.64E-15
hsa-miR-192-5p	55508.05079	5439.227364	0.098006132	-3.351175443	7.48E-17	4.64E-15
hsa-miR-106b-3p	1005.398266	1673.614275	1.663967768	1.32600967	2.36E-16	1.25E-14
hsa-miR-483-3p	96.74589373	1449.3487	14.83795016	3.916320624	3.80E-16	1.77E-14
hsa-miR-126-5p	1359.439164	487.6746424	0.359203598	-1.480151378	2.29E-14	9.46E-13
hsa-miR-139-5p	1852.319863	659.02039	0.356128698	-1.491414271	2.92E-14	1.09E-12
hsa-miR-29b-3p	1559.030152	467.5327141	0.300335678	-1.738171482	3.90E-14	1.32E-12
hsa-miR-214-3p	1535.0439	5111.703234	3.328487703	1.735198596	3.89E-13	1.21E-11
hsa-miR-1269a	52.54935126	1271.655658	23.76603316	4.594416373	6.28E-13	1.80E-11
hsa-miR-873-5p	16.02951267	137.1550029	8.112680941	3.38460858	9.91E-13	2.63E-11
hsa-miR-125b-1-3p	97.65624783	351.6556606	3.57459024	1.840899164	1.39E-12	3.44E-11
hsa-miR-181b-5p	1787.211114	5687.685282	3.181215706	1.670573002	1.52E-12	3.53E-11
hsa-miR-199a-5p	16077.08094	41820.52268	2.601151396	1.379136245	1.87E-12	4.09E-11
hsa-miR-708-5p	257.6933204	732.2276552	2.834350938	1.506342626	2.06E-12	4.26E-11
hsa-miR-432-5p	74.03286994	293.6748902	3.927277344	1.985064181	2.97E-12	5.82E-11
hsa-miR-323a-3p	28.93558365	138.6171831	4.663920529	2.310755493	5.69E-12	1.06E-10
hsa-miR-181d-5p	597.4305517	1497.773942	2.504507728	1.32353611	7.86E-12	1.39E-10
hsa-miR-12136	3816.448663	906.4952134	0.237722965	-2.074326747	1.39E-11	2.35E-10
hsa-miR-199b-5p	5546.47148	19497.20809	3.514791949	1.813781381	2.45E-11	3.96E-10
hsa-miR-429	2398.355773	642.6837512	0.268273575	-1.900026925	3.59E-11	5.56E-10
hsa-miR-204-5p	11462.15286	2241.012764	0.195584303	-2.354643208	4.25E-11	6.32E-10
hsa-miR-12135	345.691555	42.05084154	0.124176205	-3.039552781	5.57E-11	7.96E-10
hsa-miR-130b-5p	24.08592639	103.2658691	4.156349161	2.214912432	9.33E-11	1.25E-09
hsa-miR-370-3p	151.8747296	561.5329068	3.679698458	1.896176524	9.39E-11	1.25E-09
hsa-miR-214-5p	646.8403761	1876.61293	2.898264756	1.534083621	1.68E-10	2.16E-09
hsa-miR-410-3p	46.6980329	236.8145111	4.985834775	2.346352282	1.80E-10	2.23E-09
hsa-miR-483-5p	47.56047253	634.5957616	13.08874746	3.82568515	2.15E-10	2.59E-09
hsa-miR-141-3p	945.7159226	236.6160312	0.250989791	-1.998505234	2.36E-10	2.75E-09
hsa-miR-93-5p	2368.200245	3502.812767	1.478901066	1.358087842	3.44E-10	3.88E-09
hsa-miR-199a-3p	25025.97056	64433.86458	2.574617029	1.364411843	4.03E-10	4.40E-09
hsa-miR-199b-3p	12488.43383	32175.19834	2.576273574	1.365394582	4.42E-10	4.70E-09
hsa-miR-30e-5p	20906.09423	9939.276931	0.475449951	-1.072769535	6.28E-10	6.49E-09
hsa-miR-654-5p	41.31358347	165.4732216	3.934273771	1.99598783	9.43E-10	9.48E-09
hsa-miR-181a-3p	252.7740259	583.2407773	2.302208728	1.213805576	1.02E-09	9.73E-09
hsa-miR-190a-5p	1177.099687	251.2186241	0.214089374	-2.227523002	1.01E-09	9.73E-09
hsa-miR-127-3p	2812.960846	6949.691721	2.47007407	1.304739346	2.96E-09	2.75E-08
hsa-miR-379-5p	1189.068509	3584.5504	3.01289411	1.591443738	3.09E-09	2.81E-08
hsa-miR-29c-5p	427.3852224	173.6696353	0.407739637	-1.300138179	3.73E-09	3.20E-08
hsa-miR-30c-2-3p	3456.461646	1037.180293	0.300272396	-1.736705568	3.67E-09	3.20E-08
hsa-miR-200a-3p	18301.44949	5331.541704	0.291356723	-1.779352378	3.79E-09	3.20E-08
hsa-miR-29a-3p	9003.05278	3490.205462	0.387737117	-1.366331601	4.57E-09	3.77E-08
hsa-miR-495-3p	104.7393124	316.2757619	3.000546861	1.590535073	5.90E-09	4.67E-08
hsa-miR-134-5p	268.338398	724.7286959	2.694486569	1.427860847	5.90E-09	4.67E-08
hsa-miR-363-3p	2175.984138	907.171197	0.417169414	-1.261328679	6.32E-09	4.90E-08
hsa-miR-378d	380.3977108	119.5763757	0.316143417	-1.671287991	6.46E-09	4.91E-08
hsa-miR-382-5p	84.25082963	234.6813774	2.764564034	1.530491848	7.17E-09	5.23E-08
hsa-miR-378a-3p	13706.95418	5160.143389	0.376507196	-1.409492292	7.13E-09	5.23E-08
hsa-miR-887-3p	23.66274062	64.02071024	2.636394359	1.462012191	8.50E-09	6.08E-08
hsa-miR-100-5p	35559.35825	75621.32524	2.126590646	1.088529554	8.78E-09	6.16E-08
hsa-miR-183-5p	3251.814329	4134.607608	1.271393689	1.85424918	1.33E-08	9.19E-08
hsa-miR-493-5p	276.7940331	720.0650143	2.595682155	1.376698472	1.69E-08	1.14E-07
hsa-miR-203a-3p	1271.942582	255.7684414	0.201712508	-1.432536875	1.91E-08	1.27E-07
hsa-miR-382-3p	50.42409246	127.3210109	2.49534809	1.332030916	2.17E-08	1.42E-07
hsa-miR-218-5p	3483.119499	7943.713548	2.280264368	1.189356574	2.74E-08	1.76E-07
hsa-miR-422a	33.9547865	11.11640358	0.346630742	-1.607239829	2.81E-08	1.77E-07
hsa-miR-130b-3p	41.93652836	247.8361092	5.795440823	2.713887998	3.44E-08	2.13E-07
hsa-miR-503-5p	210.4131525	608.2660873	2.881874094	1.541607954	4.77E-08	2.91E-07
hsa-miR-378c	738.9992367	261.5051763	0.354737091	-1.49969866	5.45E-08	3.27E-07
hsa-miR-708-3p	450.9137056	1246.951002	2.761480758	1.478491317	7.58E-08	4.48E-07
hsa-miR-127-5p	238.6213823	644.6944877	2.6946447	1.431399506	8.44E-08	4.91E-07
hsa-miR-485-5p	28.9251726	78.02068299	2.640609096	1.504767399	1.15E-07	6.56E-07
hsa-miR-758-3p	21.3312605	61.16325968	2.783687902	1.482576288	1.35E-07	7.60E-07
hsa-miR-18a-3p	12.15488941	45.30939903	3.520318383	2.04292494	1.46E-07	8.11E-07
hsa-miR-30d-3p	148.6397094	63.63577314	0.431942654	-1.230159196	1.78E-07	9.75E-07
hsa-miR-509-3-5p	950.0387325	122.5616116	0.129922796	-2.952942496	2.12E-07	1.14E-06
hsa-miR-133b	7.2663893	256.0394733	31.09452797	2.333607483	2.97E-07	1.58E-06
hsa-miR-30b-5p	29599.59128	12886.78988	0.435389609	-1.199700995	3.48E-07	1.82E-06
hsa-miR-29b-2-5p	24.14478186	7.839561493	0.351546557	-1.533025968	3.98E-07	2.05E-06
hsa-miR-181a-5p	12369.82899	27944.54015	2.25898686	1.176175172	4.92E-07	2.51E-06
hsa-miR-196b-5p	1896.960496	4220.900116	2.224440459	1.152893925	5.09E-07	2.56E-06
hsa-miR-30a-5p	526289.4289	181530.9438	0.344927314	-1.535642245	6.59E-07	3.23E-06
hsa-miR-125b-2-3p	390.6256886	819.5315363	2.095193344	1.068528589	6.54E-07	3.23E-06
hsa-miR-411-5p	360.6764373	953.3562844	2.63870185	1.398720924	7.85E-07	3.79E-06
hsa-miR-30c-5p	37131.54835	16826.32628	0.453169174	-1.141935521	8.70E-07	4.15E-06
hsa-miR-493-3p	264.1913892	663.3318456	2.505103381	1.324149139	1.08E-06	5.09E-06
hsa-miR-30a-3p	28062.28621	10697.2165	0.381217525	-1.39144106	1.20E-06	5.60E-06
hsa-miR-200b-3p	15377.00749	5932.011451	0.385811456	-1.374218817	1.51E-06	6.95E-06
hsa-miR-381-3p	2058.567712	8546.286594	4.150039129	1.322499315	1.89E-06	8.57E-06
hsa-miR-1287-5p	20.537693	40.29445798	1.917311106	0.918721927	2.15E-06	9.65E-06
hsa-miR-514a-3p	11753.79169	1751.719274	0.149106791	-2.746153703	3.31E-06	1.46E-05
hsa-miR-671-5p	28.69431003	52.29262236	1.794708222	0.984294913	3.93E-06	1.72E-05
hsa-miR-138-5p	138.7663374	30.0620975	0.222243053	-2.197469397	4.25E-06	1.84E-05
hsa-miR-455-5p	4741.659316	2914.703604	0.614782427	-0.702673456	4.71E-06	2.00E-05
hsa-miR-200a-5p	1195.226727	428.0976615	0.358709308	-1.481823519	4.73E-06	2.00E-05
hsa-miR-494-3p	44.23388186	108.9344495	2.430356295	1.295244779	5.18E-06	2.17E-05
hsa-miR-409-5p	15.89688564	46.23467766	2.795466494	1.53774351	5.37E-06	2.22E-05
hsa-miR-144-3p	471.9638208	137.5913789	0.293027443	-1.771999674	6.21E-06	2.54E-05
hsa-miR-654-3p	181.8687653	435.2919231	2.385819812	1.251902799	6.61E-06	2.67E-05
hsa-miR-487b-3p	51.84629885	150.3762959	2.864463533	1.530291017	7.68E-06	3.07E-05
hsa-miR-378f	49.22495383	19.59183706	0.409992155	-1.3410215	9.46E-06	3.74E-05
hsa-miR-376c-3p	69.41011375	171.7440185	2.453397805	1.295654674	1.04E-05	4.02E-05
hsa-miR-3960	177.4890837	80.08289914	0.454273715	1.65018109	1.03E-05	4.02E-05
hsa-miR-320d	278.7349037	196.2885167	0.705269575	1.354532936	1.24E-05	4.75E-05
hsa-miR-342-5p	51.00841565	57.19444485	1.11894285	1.33957293	1.31E-05	4.98E-05
hsa-miR-451a	28642.45333	9731.013716	0.33976398	-1.557265025	1.58E-05	5.92E-05
hsa-miR-34a-5p	738.0527925	1591.293051	2.154505155	1.108228096	2.02E-05	7.50E-05
hsa-miR-181c-3p	73.05675412	149.9018178	2.037650983	1.043435453	2.10E-05	7.75E-05
hsa-miR-139-3p	47.03287905	18.95496054	0.415443774	-1.310504233	2.39E-05	8.71E-05
hsa-miR-128-3p	4430.801864	1589.483909	0.358879742	0.853802314	3.15E-05	0.00011379
hsa-miR-335-5p	290.7651775	627.5304428	2.154233922	1.135450217	3.30E-05	0.000118184
hsa-miR-144-5p	131.1825043	43.97689272	0.340263584	-1.553199274	3.62E-05	0.000128108
hsa-miR-338-3p	55.61863435	26.8258272	0.491460586	-1.070380659	3.99E-05	0.000139661
hsa-miR-136-3p	194.826583	429.9615713	2.200730691	1.134553677	4.02E-05	0.000139661
hsa-miR-320b	2273.806657	343.2568722	0.151334563	1.091002199	4.31E-05	0.000148393
hsa-miR-409-3p	259.7307532	588.9773063	2.26278373	1.202602621	4.80E-05	0.00016378
hsa-miR-181c-5p	226.5462126	421.4210707	1.856418817	0.888329176	5.20E-05	0.000175789
hsa-miR-27b-3p	60750.42742	39931.65218	0.657312163	-0.605377584	5.75E-05	0.000192777
hsa-miR-653-5p	99.70772657	36.85378857	0.375877699	-1.447644017	5.81E-05	0.000193112
hsa-miR-629-5p	299.6784622	310.9159365	1.037373725	0.657427394	6.55E-05	0.000215792
hsa-miR-30d-5p	68146.41374	36134.00063	0.530247571	-0.91525459	7.97E-05	0.000260171
hsa-miR-369-5p	58.77189292	118.0560329	1.991839762	0.994213768	8.46E-05	0.000273634
hsa-miR-1307-5p	539.6095156	326.0975593	0.605053278	-0.716818754	8.57E-05	0.000274678
hsa-miR-889-3p	112.3559546	231.0735418	2.047299082	1.05392822	8.96E-05	0.000284899
hsa-miR-200c-3p	3754.457954	1533.912671	0.408715179	-1.291376275	9.56E-05	0.00030149
hsa-miR-9985	99.76458825	60.70926028	0.612410186	-0.724479071	0.000103032	0.000322084
hsa-miR-101-3p	75433.63199	40776.54389	0.540567944	-0.887474568	0.000130452	0.000403336
hsa-miR-1290	5012.61229	1616.226974	0.322567219	1.219814458	0.000131193	0.000403336
hsa-miR-149-5p	345.7751417	402.6816271	1.164101974	0.966195794	0.000149637	0.00045627
hsa-miR-378a-5p	82.42451632	39.1474341	0.481242636	-1.072631771	0.000175874	0.00053191
hsa-miR-125b-5p	11448.147	20977.4466	1.832315245	0.873770299	0.000212883	0.00063865
hsa-miR-140-5p	1132.063175	750.7208445	0.663441246	-0.594850989	0.000249754	0.000743268
hsa-miR-20b-5p	229.7600148	116.3696216	0.508622006	-0.980886721	0.000269649	0.000796107
hsa-miR-760	7.801480056	16.77811178	2.019900252	1.350609702	0.000274633	0.000798151
hsa-let-7c-5p	7809.950782	12922.76146	1.654569568	0.726380066	0.000273888	0.000798151
hsa-miR-424-3p	94.94708323	208.567891	2.184202833	1.139088992	0.000344958	0.000994764
hsa-miR-184	535.763256	120.7907092	0.226898372	-2.149370526	0.000366974	0.001050111
hsa-miR-106b-5p	2232.298417	4157.67724	1.862123399	0.898959341	0.000377724	0.001064495
hsa-miR-152-3p	7333.2459	10704.83179	1.459704506	0.545896554	0.000375249	0.001064495
hsa-miR-107	729.2034632	458.8251929	0.62972201	-0.660443695	0.000456001	0.00127543
hsa-miR-22-3p	14387.35902	7732.089998	0.537454618	-0.895289084	0.000509424	0.001414222
hsa-miR-1246	20270.93904	4514.357619	0.222739305	1.048737055	0.000579797	0.001597662
hsa-miR-24-1-5p	135.3176441	88.75938389	0.658457564	-0.616294377	0.000686296	0.001877223
hsa-miR-340-5p	1397.649562	2085.420082	1.491738987	0.576467639	0.000771983	0.002096187
hsa-miR-320c	981.9852767	267.0609676	0.272700898	0.885090963	0.000807384	0.002176427
hsa-miR-133a-3p	180.3077391	1611.319345	8.892722137	1.239485681	0.000836575	0.002238892
hsa-miR-30e-3p	7903.302962	5282.805217	0.668472001	-0.581276977	0.000859597	0.002284073
hsa-miR-450b-5p	649.9381159	1332.764907	2.048988797	1.035487968	0.00095115	0.002509417
hsa-miR-660-5p	1527.953426	956.7749816	0.626425217	-0.676126927	0.001008289	0.002641434
hsa-miR-335-3p	427.7008898	862.5911992	2.014437618	1.037112416	0.001039816	0.002704977
hsa-miR-4448	117.0758138	300.5281877	2.553682909	1.356798962	0.001121295	0.002896679
hsa-miR-32-5p	1082.2939	632.0143971	0.584342252	-0.777409168	0.001391224	0.00356921
hsa-miR-582-5p	155.8322006	93.70255086	0.603846344	-0.739106744	0.001693721	0.004315508
hsa-miR-1297	12.33495034	5.419594293	0.481411189	-0.982176717	0.001745129	0.004416244
hsa-miR-181a-2-3p	615.5863714	1090.622827	1.770429704	0.839733519	0.001886491	0.004741721
hsa-miR-9-5p	1054.399134	449.4629693	0.426817641	-1.230377503	0.00203889	0.005090384
hsa-miR-1301-3p	41.39577124	65.82638246	1.576251133	0.780513422	0.002119149	0.005220685
hsa-miR-582-3p	855.4493324	544.0215958	0.636373426	-0.6544007	0.002112917	0.005220685
hsa-miR-3913-5p	35.62297805	55.4332146	1.540923693	0.798235189	0.002260263	0.005531696
hsa-miR-132-3p	274.6813734	440.0477034	1.599845858	0.679197803	0.002533253	0.006159281
hsa-miR-16-2-3p	76.12343184	62.12191986	0.818453204	0.62926779	0.002597554	0.006274611
hsa-miR-99a-5p	93573.52418	149410.3746	1.596709958	0.675100126	0.002635119	0.006283744
hsa-miR-320a-3p	2962.121525	2339.210975	0.789778939	0.749509732	0.002622011	0.006283744
hsa-miR-342-3p	1303.811437	2154.691229	1.652109392	0.72755423	0.003508069	0.008312112
hsa-miR-18a-5p	153.7557943	500.2631721	3.239059153	0.821831123	0.003553692	0.008366921
hsa-miR-424-5p	1896.04297	1949.912271	1.028396458	-0.825329081	0.003601187	0.008425418
hsa-miR-377-3p	23.59061609	42.50044913	1.768985737	0.866272188	0.003753253	0.008726312
hsa-miR-25-3p	6004.009241	9686.041351	1.613160107	0.691956944	0.003777203	0.008727451
hsa-miR-574-5p	217.1487251	313.2155986	1.440373298	0.521695293	0.003874563	0.008897144
hsa-miR-421	87.20361836	129.0303973	1.474207064	0.557544475	0.003905332	0.008912783
hsa-miR-3168	617.9595827	291.9304775	0.473262691	1.231177381	0.004009581	0.009094904
hsa-miR-10400-5p	718.5250753	380.0217882	0.529546226	1.121344668	0.00416104	0.009381254
hsa-miR-362-5p	345.2681235	199.1868827	0.578126802	-0.794645981	0.004342865	0.009673927
hsa-miR-511-5p	27.44913144	64.16131859	2.290450192	1.218728915	0.0043386	0.009673927
hsa-miR-129-5p	45.81790841	19.49215433	0.437699056	-1.210724262	0.00466258	0.010324283
hsa-miR-331-5p	32.05604614	49.24414996	1.519968533	0.651989346	0.004935729	0.010864444
hsa-miR-182-5p	3313.614119	7101.334918	2.142733562	1.101740693	0.004996638	0.010933819
hsa-miR-340-3p	66.41357473	100.4060209	1.504237407	0.705498675	0.005571358	0.012080352
hsa-miR-6765-3p	446.3541405	232.8359506	0.522708811	-0.936639158	0.005585539	0.012080352
hsa-miR-96-5p	563.6399226	1171.771416	2.077025321	1.061097106	0.005919951	0.012729605
hsa-miR-23b-3p	9578.424488	7287.025084	0.760799889	-0.394647884	0.006482461	0.013859055
hsa-miR-542-3p	1300.811298	2357.547938	1.811743332	0.85745254	0.006542574	0.013907642
hsa-miR-4488	955.2412074	76.35119303	0.08089088	1.205261776	0.006877638	0.014536826
hsa-miR-221-5p	288.9930021	233.963373	0.810238079	-0.304861392	0.008183844	0.017170475
hsa-miR-7-5p	2280.799773	3884.97375	1.703030124	0.76912637	0.00821598	0.017170475
hsa-miR-3613-5p	113.6761252	187.0610126	1.639931698	0.710306219	0.009017902	0.018741115
hsa-miR-4497	1693.364609	497.0086836	0.293920612	1.084544338	0.009163221	0.018937323
hsa-miR-450a-5p	395.0336001	650.4690192	1.644984211	0.717862371	0.010497599	0.021575176
hsa-miR-1-3p	3000.768881	12671.4105	4.221647636	0.798851661	0.010787269	0.022048704
hsa-miR-320e	68.06237233	60.74397823	0.894032107	0.961658899	0.011320381	0.023011921
hsa-miR-155-5p	1027.418149	1629.688317	1.585627713	0.665215259	0.011727223	0.023709386
hsa-miR-130a-3p	821.5667276	1199.49245	1.459446887	0.55170012	0.012189953	0.024511689
hsa-miR-1843	93.54557002	53.76062132	0.579198172	0.53311033	0.013559462	0.027118923
hsa-miR-33a-5p	302.5225582	187.8995456	0.622357517	-0.690538463	0.013637294	0.027128735
hsa-miR-7704	1229.32699	416.474978	0.339320344	0.832956849	0.014003004	0.027708072
hsa-miR-454-3p	412.3650959	591.1911755	1.432610497	0.515044259	0.014788698	0.029107914
hsa-miR-22-5p	166.3763091	118.2360225	0.712382912	-0.503679639	0.015536949	0.03041971
hsa-miR-2110	13.16676351	21.06264644	1.557352632	0.697389208	0.016522625	0.032180192
hsa-let-7f-1-3p	43.63973548	32.05984304	0.74059227	-0.448583336	0.016945568	0.032832039
hsa-miR-769-5p	1001.655514	1324.404122	1.321893814	0.401216426	0.018652832	0.035851512
hsa-miR-99b-3p	578.6685997	779.5823923	1.346601132	0.447205151	0.018696756	0.035851512
hsa-miR-17-5p	1329.233143	2124.292516	1.597684231	0.681015405	0.019452745	0.037109852
hsa-miR-502-3p	353.7636737	253.8025389	0.718231763	-0.480837554	0.019555208	0.037114986
hsa-miR-744-5p	335.2853115	506.5149681	1.509179708	0.606959274	0.022581735	0.042641652
hsa-miR-140-3p	11627.99639	9567.320904	0.82279851	-0.281368698	0.022757833	0.042757141
hsa-miR-26b-5p	40506.26967	31211.06372	0.770529931	-0.376134999	0.022965208	0.042929937
hsa-miR-4508	129.0960912	68.03257908	0.530627619	0.965716222	0.025399392	0.047242869
hsa-miR-455-3p	702.6656357	515.8348974	0.734489324	-0.447697603	0.025594068	0.047368127
hsa-miR-3609	68.67737053	106.0111323	1.535808993	0.625533075	0.02731271	0.050298653
hsa-miR-497-5p	468.7286375	322.2296257	0.688119906	-0.544169999	0.027449943	0.050302359
hsa-let-7i-5p	106099.1058	156893.2613	1.478738029	0.564401225	0.028474209	0.051923558
hsa-miR-576-3p	51.53871798	70.21133837	1.355406852	0.455637563	0.034279337	0.062204456
hsa-miR-375-3p	43.60118853	40.17516176	0.923185303	-0.876841474	0.035602889	0.064292595
hsa-miR-135a-5p	941.5816799	1233.896185	1.310121141	-0.649675583	0.04065397	0.073059308
hsa-miR-92b-3p	626.6454317	938.372665	1.496661359	0.586912207	0.041947662	0.07502178
hsa-miR-500a-3p	760.0889476	561.9436522	0.739655534	-0.436211928	0.043240861	0.076964594
hsa-miR-135b-5p	689.6604476	1048.147351	1.519049418	0.602791113	0.045028826	0.079765349
hsa-miR-17-3p	82.79642455	117.5398034	1.414616483	0.549004164	0.052994081	0.093430323
hsa-miR-196a-5p	2313.071388	3417.881129	1.47743114	0.562863258	0.05387869	0.094541851
hsa-let-7d-5p	1803.247384	2132.124847	1.182279584	0.240857667	0.054739336	0.095601095
hsa-miR-345-5p	222.7443908	288.5689051	1.294195148	0.377014998	0.056178909	0.097656794
hsa-miR-874-3p	188.3803327	139.3079842	0.740879384	-0.434251359	0.058587854	0.100983409
hsa-miR-3178	39.86284088	25.28798153	0.643322416	0.591479579	0.058635528	0.100983409
hsa-let-7g-3p	49.24482057	35.44774782	0.725403084	-0.50186954	0.06404979	0.109799641
hsa-miR-574-3p	652.7553775	938.9429882	1.437759475	0.52504585	0.065931632	0.112507189
hsa-miR-26a-2-3p	39.64944287	27.7295731	0.706764252	-0.47425053	0.07028267	0.119384261
hsa-miR-27a-3p	14728.08736	11868.20688	0.805834509	-0.311299568	0.071859908	0.121508571
hsa-miR-619-5p	39.90991052	60.52474154	1.503907996	0.675340705	0.072236062	0.121591924
hsa-miR-664b-3p	22.08076678	13.22065923	0.616125944	-0.673272302	0.075784757	0.126990675
hsa-miR-196a-3p	86.28975324	161.7220354	1.864159645	0.91290692	0.080348106	0.134033612
hsa-let-7e-5p	3004.025923	3433.7882	1.143014499	0.193099818	0.08341443	0.137911858
hsa-let-7e-3p	70.20696748	93.26925951	1.323876902	0.420835372	0.083131151	0.137911858
hsa-miR-3195	424.5597005	102.3254553	0.242798966	0.686340834	0.088892042	0.146317874
hsa-miR-425-5p	822.0276326	1035.877068	1.259832631	0.335614251	0.093189839	0.152716388
hsa-miR-501-3p	341.9181872	251.8550293	0.737362551	-0.439152319	0.094381616	0.153991058
hsa-miR-491-5p	15.22401351	20.62013642	1.332600987	0.428087736	0.095213115	0.15466934
hsa-miR-664a-3p	433.1221373	322.9614351	0.74624491	-0.42193352	0.098442624	0.159220244
hsa-let-7f-5p	151139.6191	123741.7491	0.818725964	-0.288559875	0.10215664	0.164433736
hsa-miR-10395-3p	555.1770055	735.5602853	1.324327108	0.40343954	0.102550072	0.164433736
hsa-miR-99a-3p	77.05444906	100.6443075	1.302223111	0.367552479	0.105113913	0.167821355
hsa-miR-1261	72.94656506	46.99212704	0.649010904	-0.645616678	0.106517665	0.169335775
hsa-miR-361-5p	503.0622849	590.9870501	1.174432343	0.230449517	0.117596048	0.186152042
hsa-miR-186-5p	1921.813493	1712.577555	0.891182406	-0.166431935	0.118496039	0.186781892
hsa-miR-365a-3p	143.8922382	105.3349944	0.733890205	-0.445268414	0.12094661	0.1890426
hsa-miR-365b-3p	143.8922382	105.3349944	0.733890205	-0.445268414	0.12094661	0.1890426
hsa-miR-1291	369.4531735	500.9241381	1.354892262	0.4418999	0.122050596	0.189178424
hsa-miR-532-5p	9974.051014	7925.566263	0.79463917	-0.331784961	0.121543761	0.189178424
hsa-miR-339-3p	141.8926066	177.9203892	1.252131888	0.315634385	0.123762569	0.190506918
hsa-miR-374a-3p	1966.081213	1441.98161	0.733564837	-0.447568529	0.12393192	0.190506918
hsa-miR-106a-5p	127.3658963	98.22630137	0.772995821	-0.362817685	0.126690602	0.193946107
hsa-miR-4454	1947.147764	1516.974849	0.779188764	-0.361416144	0.13501496	0.20584248
hsa-miR-15b-5p	232.8435089	273.9609643	1.175833213	0.223806085	0.140863389	0.21388237
hsa-miR-195-5p	1259.625915	973.2817297	0.772855546	-0.373146975	0.151387909	0.228928057
hsa-miR-24-3p	12903.49416	11517.6171	0.892605084	-0.163646772	0.152625713	0.229865446
hsa-miR-1248	818.1109703	1043.358545	1.274990304	0.350221132	0.159575621	0.239363431
hsa-miR-6516-3p	17.72325723	23.40508394	1.303463582	0.458209309	0.162480013	0.242741224
hsa-miR-195-3p	77.99531284	106.3815622	1.359340932	0.441009611	0.181796221	0.270512777
hsa-miR-505-3p	142.0946827	123.4369883	0.869612944	-0.211916841	0.183985135	0.272679165
hsa-miR-324-5p	113.740761	134.5873106	1.181683906	0.275245778	0.185552594	0.273910973
hsa-miR-671-3p	23.19565979	31.16985853	1.329571453	0.453304029	0.18880354	0.277608367
hsa-miR-27b-5p	142.8890217	122.9946269	0.861737924	-0.219499346	0.190469556	0.278955413
hsa-miR-16-5p	4321.188757	5003.736688	1.157917196	0.211409481	0.194528233	0.283782363
hsa-miR-324-3p	148.2730792	167.4353105	1.128370309	0.17223255	0.205740381	0.298966491
hsa-miR-423-5p	1542.575601	1238.771814	0.80318179	0.326095786	0.211930252	0.306762855
hsa-miR-10b-5p	376885.2882	315269.2846	0.836513013	-0.257535675	0.212807926	0.306839336
hsa-miR-193a-3p	83.80998733	70.09904173	0.838333361	-0.269065026	0.216620525	0.309951802
hsa-miR-1180-3p	347.6872044	419.159181	1.204974475	0.280164995	0.21663298	0.309951802
hsa-miR-21-5p	331802.8679	437108.0133	1.317371663	0.397659811	0.21747177	0.309959764
hsa-miR-1268a	100.796872	74.58391598	0.742497431	-0.40905774	0.218974865	0.310910877
hsa-miR-136-5p	169.8825308	214.7918673	1.262808236	0.341213356	0.220672701	0.312130209
hsa-miR-10b-3p	396.6246863	401.8695151	1.0131904	0.238011007	0.225952372	0.318387433
hsa-miR-142-3p	2125.121305	1631.632722	0.767892556	-0.380980814	0.228263031	0.320429613
hsa-miR-20a-5p	2672.569272	3349.21181	1.253085845	0.327594768	0.230955818	0.32240253
hsa-miR-328-3p	720.1735494	557.1819651	0.773991178	-0.367032454	0.231401816	0.32240253
hsa-miR-652-3p	403.411003	362.6569969	0.899226268	-0.159283959	0.246375675	0.341984146
hsa-miR-4443	141.9368293	180.7630583	1.271632085	0.383492886	0.25361571	0.350725071
hsa-miR-3158-3p	97.4629757	117.421651	1.202702338	0.286165889	0.259901102	0.358085963
hsa-miR-10a-3p	263.1831266	328.2451195	1.246276111	0.318719328	0.274312358	0.376546854
hsa-miR-151b	69.2321172	61.07188	0.883810463	-0.199827017	0.278513987	0.380908836
hsa-miR-34c-5p	72.49345336	90.826474	1.249451071	0.308899388	0.296691641	0.404283115
hsa-miR-222-3p	2032.720482	1736.381119	0.854287074	-0.222191653	0.313114319	0.424409503
hsa-miR-425-3p	138.7422819	148.3385368	1.068671091	0.159753371	0.313743584	0.424409503
hsa-miR-423-3p	6800.274359	5009.071142	0.736637118	0.225899147	0.335845235	0.451197904
hsa-miR-142-5p	5514.240701	1656.719206	0.3005706	0.335474753	0.337185531	0.451197904
hsa-miR-92a-3p	20516.34567	24685.47795	1.203200372	0.267293218	0.3359892	0.451197904
hsa-miR-193b-3p	286.7685528	245.270834	0.85579481	-0.225572424	0.345607642	0.46081019
hsa-miR-5701	807.5776005	943.1404809	1.167655993	0.221549843	0.350792755	0.466053232
hsa-miR-7977	635.9818632	724.5705543	1.139075688	0.185759609	0.3592755	0.474639064
hsa-miR-331-3p	268.3286661	321.1222592	1.196019213	0.260506084	0.360547713	0.474639064
hsa-miR-511-3p	20.98335245	15.61986523	0.756020505	-0.300678735	0.361082943	0.474639064
hsa-miR-148b-5p	71.28966061	77.61904644	1.087555894	0.144759257	0.364117291	0.475268885
hsa-miR-330-3p	68.31345359	80.03032257	1.169041771	0.294051662	0.363959762	0.475268885
hsa-let-7b-3p	186.8754137	158.8288204	0.850717064	-0.234499648	0.389596131	0.506747415
hsa-miR-223-3p	526.1916579	643.499426	1.222514462	0.29502266	0.395703527	0.512897951
hsa-miR-145-5p	11267.02492	9662.441197	0.857598494	-0.221640756	0.399848489	0.515838153
hsa-miR-877-5p	41.7945335	48.55309471	1.15793048	0.372317164	0.400745231	0.515838153
hsa-miR-32-3p	25.83503587	22.55135291	0.877634486	-0.237928919	0.406856163	0.52189825
hsa-miR-5100	1520.200236	1352.959671	0.890060124	-0.16691033	0.419478358	0.536240376
hsa-miR-151a-5p	687.697981	626.5944705	0.911276768	-0.138189322	0.429151542	0.546727307
hsa-miR-143-3p	606476.9098	536664.4652	0.884888726	-0.176435823	0.442948788	0.562378666
hsa-miR-125a-5p	14219.84618	12222.29873	0.859533854	-0.217938703	0.446472213	0.564924025
hsa-miR-98-5p	2899.127214	2632.992308	0.908233368	-0.139853036	0.450377727	0.567933947
hsa-miR-625-3p	109.7808978	124.6167225	1.133920423	0.198533781	0.458615988	0.576368741
hsa-miR-15b-3p	43.49790813	51.33436364	1.176108402	0.222124801	0.468012331	0.586197263
hsa-miR-361-3p	2316.435753	2110.996186	0.91135048	-0.134210106	0.47002884	0.586747411
hsa-miR-326	84.58021788	73.27741673	0.867927409	-0.185078345	0.489014083	0.608405482
hsa-miR-5010-3p	46.02636421	39.16974758	0.854196327	-0.21033169	0.492036265	0.610124968
hsa-miR-1260b	1287.667429	1179.38838	0.915975955	-0.127448314	0.509530346	0.628223151
hsa-miR-210-3p	810.5065565	719.4191804	0.887755219	-0.170024646	0.511697889	0.628223151
hsa-miR-3605-3p	35.36993792	19.84249173	0.573069214	0.200500726	0.510941044	0.628223151
hsa-miR-452-5p	238.3199625	273.4470598	1.146778802	0.192971496	0.522218071	0.639030008
hsa-miR-205-5p	210.6372593	275.0045011	1.30413946	0.385669422	0.525514522	0.640955417
hsa-miR-484	736.7020325	646.1435834	0.877242511	-0.178992178	0.531354218	0.642760998
hsa-miR-28-3p	2873.902047	3000.697453	1.044104252	0.061891668	0.529178489	0.642760998
hsa-miR-10a-5p	188993.7942	167757.0754	0.887633313	-0.17196833	0.532178461	0.642760998
hsa-miR-651-5p	107.2913978	123.4215748	1.1489516	0.197615465	0.53545923	0.644630529
hsa-miR-1260a	1159.157471	1069.21327	0.92247242	-0.117101304	0.539496065	0.647395278
hsa-miR-24-2-5p	126.8026718	135.9954938	1.071929811	0.149214012	0.552558531	0.660938179
hsa-miR-125a-3p	37.62647929	34.80020117	0.926830553	0.181334046	0.565746893	0.672389279
hsa-miR-369-3p	281.7445918	248.8352454	0.883607512	-0.18192615	0.565046377	0.672389279
hsa-miR-148b-3p	8293.290161	7854.874817	0.947142512	-0.078084924	0.570839395	0.674134143
hsa-miR-548o-3p	33.69341213	37.85714533	1.120015096	0.107456686	0.570392562	0.674134143
hsa-miR-941	597.7596084	660.9341241	1.10550898	0.159031888	0.574193617	0.675949448
hsa-miR-28-5p	326.0954478	315.2701776	0.966904858	-0.065388318	0.58468222	0.686125508
hsa-let-7g-5p	42191.75385	45380.36601	1.075572506	0.105091222	0.587087507	0.686781613
hsa-miR-504-5p	220.5669134	242.1362198	1.09734895	0.151621169	0.597363153	0.696611577
hsa-miR-486-5p	2302.124154	671.2814747	0.291899798	-0.172142096	0.612024092	0.711478007
hsa-miR-1827	12.19463333	10.68290488	0.885428536	-0.138525445	0.624068389	0.723219441
hsa-miR-499a-5p	130.0038565	651.9723507	4.984375025	0.144450589	0.628423435	0.726004713
hsa-miR-191-5p	4473.008738	4713.553709	1.053764976	0.076856842	0.635288053	0.731496711
hsa-miR-15a-5p	332.4991247	354.4259111	1.065747658	0.090709115	0.637110038	0.731496711
hsa-miR-27a-5p	407.5634499	452.0977969	1.109002279	0.149893061	0.642357382	0.735252142
hsa-miR-374a-5p	2142.996993	2037.552615	0.950818785	-0.073786802	0.646621653	0.737862745
hsa-miR-150-5p	1533.54437	1371.861154	0.89463764	-0.160751907	0.65941713	0.750162606
hsa-miR-21-3p	567.0278678	623.6308633	1.099648272	0.134617371	0.663798097	0.752844184
hsa-miR-330-5p	61.73469666	53.26753362	0.865032215	-0.09397459	0.668337583	0.755688695
hsa-miR-224-5p	179.7859584	195.7389182	1.088242251	0.151347075	0.690983832	0.776573975
hsa-miR-197-3p	991.1129215	1080.870022	1.09047065	0.126244885	0.689408407	0.776573975
hsa-miR-148a-3p	399173.2284	380992.441	0.954454005	-0.067253575	0.696584902	0.780510794
hsa-miR-1307-3p	812.6765944	750.9865776	0.924183616	-0.104233155	0.704787182	0.785853868
hsa-miR-4800-3p	56.79548374	60.4394803	1.06304985	0.158065758	0.705578473	0.785853868
hsa-let-7a-3p	182.6876213	173.7740369	0.951474224	-0.076223038	0.710996701	0.789524695
hsa-miR-185-3p	25.21026161	24.39200645	0.968781114	0.114565001	0.715548731	0.792214666
hsa-miR-95-3p	367.4636828	389.6894746	1.06032017	0.08155723	0.747356737	0.820007982
hsa-miR-615-3p	549.2810975	593.7829167	1.080871066	0.122809098	0.751579661	0.820007982
hsa-miR-146a-5p	7973.095867	7641.484899	0.958413973	-0.061558345	0.750807518	0.820007982
hsa-miR-193a-5p	119.411114	122.5723197	1.026253437	0.09302211	0.747338049	0.820007982
hsa-miR-143-5p	1860.865644	1948.334371	1.046979076	0.06494208	0.751673984	0.820007982
hsa-let-7a-5p	33684.65502	32622.91713	0.968481008	-0.046131639	0.76755141	0.834880481
hsa-miR-374b-5p	3023.939405	2934.917279	0.970570608	-0.04418302	0.774700861	0.840200351
hsa-miR-374b-3p	19.14536967	20.55407786	1.069927145	0.067605789	0.777656792	0.840954437
hsa-miR-221-3p	3257.799943	2073.511969	0.636587703	-0.036890223	0.786429784	0.847937667
hsa-miR-146b-5p	29907.90118	31359.11236	1.048521046	0.068350341	0.788673207	0.847937667
hsa-miR-19a-3p	1776.934917	1714.463535	0.964862953	-0.050389583	0.806060099	0.864133594
hsa-miR-132-5p	241.0463241	225.6552017	0.936412493	-0.065691282	0.814944887	0.871147983
hsa-let-7b-5p	22587.91809	22014.48762	0.974614523	-0.037163962	0.829095943	0.878055495
hsa-miR-148a-5p	162.2708942	155.1197089	0.956200489	-0.035089203	0.830441119	0.878055495
hsa-miR-103a-3p	9970.689973	9778.235021	0.980699866	-0.026755217	0.827580675	0.878055495
hsa-miR-3615	449.1962173	79.19485094	0.178133107	-0.068895554	0.83084821	0.878055495
hsa-miR-4791	784.4703383	747.735441	0.953231974	-0.070056159	0.844596856	0.889220931
hsa-miR-23a-3p	4439.219211	4529.49818	1.020332097	0.028759256	0.846194112	0.889220931
hsa-miR-589-5p	56.83355771	58.39093013	1.026928525	0.034610546	0.860035918	0.898689218
hsa-miR-664a-5p	44.19234812	42.83184362	0.969895246	0.045968348	0.858098712	0.898689218
hsa-miR-598-3p	102.7089685	105.1290203	1.023335029	0.0418903	0.871515487	0.907141945
hsa-miR-145-3p	613.1189909	631.1518726	1.029363824	0.039351229	0.873002195	0.907141945
hsa-let-7d-3p	526.2259587	513.890007	0.976602154	-0.031173141	0.890047761	0.922277903
hsa-miR-151a-3p	23003.43143	22759.36854	0.989390614	-0.015608604	0.89495249	0.924784239
hsa-miR-99b-5p	17005.05972	17266.02209	1.015345258	0.022462275	0.920166541	0.948204857
hsa-miR-4286	544.3526025	538.1214837	0.988574147	-0.020735335	0.923978139	0.949502397
hsa-miR-19b-3p	2936.88626	2902.579457	0.988322624	-0.01624908	0.932652107	0.950871599
hsa-miR-4449	26.07120793	21.82547719	0.843164341	-0.03288325	0.932978854	0.950871599
hsa-miR-146b-3p	370.7117037	364.978866	0.984577193	-0.022038358	0.930785401	0.950871599
hsa-miR-585-3p	78.26798059	77.19906175	0.986515125	-0.021092107	0.940061453	0.955472297
hsa-let-7i-3p	69.75835823	70.78170269	1.014462524	0.012322068	0.956135514	0.966528292
hsa-miR-26a-5p	217981.2172	219155.6296	1.005387652	0.007748937	0.955399482	0.966528292
hsa-miR-921	516.646703	510.9577566	0.989009982	-0.015786946	0.961952527	0.969773279
hsa-miR-185-5p	527.9950585	523.5404441	0.9915791	-0.007164568	0.968176525	0.973409911
hsa-miR-339-5p	304.7712936	305.6718484	1.002945191	0.007163042	0.971904973	0.974524663
hsa-miR-3182	4126.993047	4134.210191	1.001748342	0.002428788	0.994818936	0.994818936
