# Supplementary material for: Integrative Transcriptomic Profiling of the Wilms Tumor
Source: Cancers (Basel). 2023 Jul 28;15(15):3846. doi: 10.3390/cancers15153846 (PMC10416970; doi:10.3390/cancers15153846)
Supplement: Supplementary file 1 [file cancers-15-03846-s001.zip › Supplementary Table S7.csv]

INTEGRATIVE TRANSCRIPTOMIC PROFILING OF WILMS TUMOR
Supplementary Table S7: FFT mRNA DeSeq2 results.
ID	hgnc_symbol	SALMON_DESeq2_baseMean	SALMON_DESeq2_log2FoldChange	SALMON_DESeq2_lfcSE	SALMON_DESeq2_stat	SALMON_DESeq2_pvalue	SALMON_DESeq2_padj
ENSG00000147614	ATP6V0D2	9.71E-25	1325.002366	-7.339870991	0.472025728	-15.54972653	1.60E-54	3.74E-50
ENSG00000184908	CLCNKB	6.07E-36	12867.60612	-8.75627867	0.585117355	-14.96499565	1.24E-50	1.46E-46
ENSG00000113073	SLC4A9	4.43E-34	2074.03785	-8.884937803	0.619086483	-14.35169083	1.04E-46	8.12E-43
ENSG00000186335	SLC36A2	5.06E-50	4951.326333	-11.33725173	0.797729877	-14.2118931	7.73E-46	4.53E-42
ENSG00000136872	ALDOB	2.56E-47	68319.6215	-11.89486141	0.854299642	-13.92352381	4.56E-44	1.78E-40
ENSG00000204978	ERICH4	9.67E-20	352.948466	-7.75358761	0.562307629	-13.78887144	2.97E-43	9.95E-40
ENSG00000186510	CLCNKA	1.63E-39	8460.94968	-9.000742096	0.653251453	-13.77837288	3.44E-43	1.01E-39
ENSG00000169344	UMOD	6.71E-50	239119.1686	-12.93390227	0.945895935	-13.67370531	1.46E-42	3.79E-39
ENSG00000162399	BSND	3.24E-33	2218.914671	-8.765378331	0.641405321	-13.66589588	1.62E-42	3.80E-39
ENSG00000160282	FTCD	5.32E-34	11631.06818	-8.256190433	0.604617426	-13.6552307	1.88E-42	4.00E-39
ENSG00000197901	SLC22A6	4.17E-51	10949.28487	-11.38859926	0.839869738	-13.55995906	6.92E-42	1.35E-38
ENSG00000186529	CYP4F3	2.76E-43	5932.427414	-9.345934568	0.690691704	-13.53126801	1.02E-41	1.84E-38
ENSG00000158104	HPD	5.38E-45	8214.762542	-9.86255837	0.733756104	-13.44119432	3.47E-41	5.80E-38
ENSG00000066230	SLC9A3	5.56E-21	10432.65681	-5.507877989	0.410695558	-13.41109705	5.21E-41	8.13E-38
ENSG00000140675	SLC5A2	3.45E-32	6352.240075	-7.392933221	0.561405261	-13.16862121	1.33E-39	1.95E-36
ENSG00000140297	GCNT3	1.24E-19	687.3329647	-6.957249451	0.533456024	-13.0418425	7.07E-39	9.20E-36
ENSG00000100253	MIOX	3.84E-42	15689.24508	-10.01070162	0.770622675	-12.99040626	1.39E-38	1.71E-35
ENSG00000168269	FOXI1	6.67E-23	324.5823726	-9.148693715	0.711003407	-12.8672994	6.88E-38	8.05E-35
ENSG00000137843	PAK6	6.87E-09	707.8385471	-3.835597489	0.302708873	-12.67091199	8.57E-37	9.56E-34
ENSG00000151715	TMEM45B	2.31E-06	419.6989587	-3.306143942	0.261253032	-12.65494957	1.05E-36	1.12E-33
ENSG00000167580	AQP2	3.24E-47	37922.09856	-11.2366088	0.901091537	-12.46999704	1.09E-35	1.11E-32
ENSG00000173698	ADGRG2	2.67E-24	2678.094988	6.872290391	0.559978257	12.27242362	1.27E-34	1.24E-31
ENSG00000169347	GP2	3.54E-44	2747.287783	-10.30609689	0.841765359	-12.24343195	1.82E-34	1.71E-31
ENSG00000241119	UGT1A9	5.06E-50	3868.934625	-11.42203327	0.947257882	-12.0579976	1.76E-33	1.53E-30
ENSG00000183798	EMILIN3	9.17E-17	870.7722485	5.872102052	0.487491906	12.04553753	2.05E-33	1.71E-30
ENSG00000140519	RHCG	2.40E-36	1672.855134	-10.33877019	0.862090107	-11.99267931	3.88E-33	3.13E-30
ENSG00000158296	SLC13A3	9.16E-26	12316.47064	-6.487186411	0.547059388	-11.8582855	1.95E-32	1.52E-29
ENSG00000116771	AGMAT	6.03E-33	16194.45524	-8.23696283	0.699008552	-11.78377977	4.73E-32	3.57E-29
ENSG00000108551	RASD1	4.71E-16	3237.757332	-4.661580286	0.397025685	-11.74125621	7.83E-32	5.73E-29
ENSG00000214128	TMEM213	7.45E-33	3905.916655	-8.075531438	0.688115203	-11.73572594	8.36E-32	5.93E-29
ENSG00000005001	PRSS22	1.59E-17	611.9729851	-6.318633378	0.540045128	-11.70019512	1.27E-31	8.76E-29
ENSG00000176387	HSD11B2	4.59E-13	13481.03796	-4.054648128	0.346776171	-11.69240699	1.39E-31	9.32E-29
ENSG00000231013	SCTR-AS1	7.10E-13	140.4046897	-6.132528929	0.525635606	-11.66688265	1.88E-31	1.22E-28
ENSG00000070915	SLC12A3	7.71E-37	11379.55235	-8.629869124	0.741244295	-11.64240883	2.51E-31	1.59E-28
ENSG00000126778	SIX1	2.02E-25	1174.310698	7.983024633	0.688879928	11.58841231	4.72E-31	2.91E-28
ENSG00000115896	PLCL1	2.09E-13	3216.015811	-4.131509877	0.357905016	-11.54359311	7.95E-31	4.78E-28
ENSG00000240583	AQP1	2.45E-16	32853.44794	-4.944819548	0.429115295	-11.52328899	1.01E-30	5.89E-28
ENSG00000185686	PRAME	4.94E-34	5056.816035	7.779230382	0.675874395	11.50987586	1.18E-30	6.72E-28
ENSG00000130294	KIF1A	1.59E-26	5194.867919	6.433533162	0.56614547	11.36374573	6.34E-30	3.37E-27
ENSG00000116096	SPR	2.70E-09	1442.091712	-3.591576786	0.317135956	-11.3250381	9.86E-30	5.13E-27
ENSG00000172478	MAB21L4	6.27E-28	851.9782426	-8.708272379	0.769246824	-11.32051782	1.04E-29	5.29E-27
ENSG00000186715	MST1L	1.25E-22	3758.422186	-5.856574453	0.519471177	-11.27410858	1.76E-29	8.78E-27
ENSG00000088926	F11	9.18E-26	1130.843652	-7.743041008	0.692311554	-11.18433019	4.87E-29	2.37E-26
ENSG00000113889	KNG1	3.33E-47	9926.984402	-10.73603943	0.964442373	-11.13186203	8.78E-29	4.11E-26
ENSG00000113905	HRG	3.74E-19	535.5518898	-7.245898971	0.651712405	-11.11824621	1.02E-28	4.70E-26
ENSG00000204653	ASPDH	5.14E-31	1084.709137	-9.115392408	0.821442945	-11.09680528	1.30E-28	5.85E-26
ENSG00000104313	EYA1	4.70E-32	5070.168474	7.557367178	0.687680963	10.98964139	4.29E-28	1.89E-25
ENSG00000150201	FXYD4	3.31E-29	554.2570636	-10.32243293	0.949052769	-10.87656373	1.49E-27	6.46E-25
ENSG00000133477	FAM83F	4.20E-24	2584.724871	-6.506641459	0.600477322	-10.83578217	2.33E-27	9.87E-25
ENSG00000178445	GLDC	3.69E-18	4324.131751	-4.89390399	0.45169392	-10.83455804	2.36E-27	9.87E-25
ENSG00000138030	KHK	4.35E-21	15745.83151	-5.710233809	0.527269374	-10.82982264	2.49E-27	1.02E-24
ENSG00000170577	SIX2	3.25E-33	5872.782962	7.630317281	0.705680276	10.81271156	3.00E-27	1.21E-24
ENSG00000171227	TMEM37	9.91E-14	3484.976428	-4.134866247	0.384640109	-10.74996121	5.93E-27	2.28E-24
ENSG00000174514	MFSD4A	8.28E-25	3641.746464	-6.167814485	0.574240816	-10.7408152	6.55E-27	2.47E-24
ENSG00000116039	ATP6V1B1	2.92E-16	2141.761874	-5.015500975	0.469760105	-10.67672822	1.31E-26	4.79E-24
ENSG00000183496	MEX3B	5.59E-11	1778.968473	4.029187709	0.378190906	10.6538461	1.67E-26	6.03E-24
ENSG00000139988	RDH12	1.07E-17	453.2329085	-6.880124794	0.647261071	-10.6295977	2.17E-26	7.70E-24
ENSG00000197892	KIF13B	1.12E-06	14935.55133	-2.647898595	0.249215213	-10.62494768	2.28E-26	7.97E-24
ENSG00000213901	SLC23A3	1.86E-19	3054.941947	-5.376263927	0.506255453	-10.6196662	2.41E-26	8.31E-24
ENSG00000120328	PCDHB12	1.30E-06	1122.12238	3.085188623	0.290668759	10.61410464	2.56E-26	8.70E-24
ENSG00000111199	TRPV4	9.41E-09	1460.172737	-3.435350284	0.323877528	-10.60694241	2.77E-26	9.25E-24
ENSG00000167741	GGT6	6.10E-24	2803.125015	-6.227768916	0.587753424	-10.59588709	3.11E-26	1.02E-23
ENSG00000122194	PLG	7.76E-48	6528.008338	-10.16279096	0.959515625	-10.59158465	3.26E-26	1.05E-23
ENSG00000205358	MT1H	1.20E-19	368.5197132	-7.618633721	0.720694691	-10.57123608	4.05E-26	1.28E-23
ENSG00000250208	FZD10-AS1	1.09E-14	1427.590681	4.992089299	0.472470023	10.56593869	4.29E-26	1.34E-23
ENSG00000241635	UGT1A1	1.31E-18	510.8676414	-6.884090186	0.652771932	-10.54593472	5.30E-26	1.63E-23
ENSG00000180638	SLC47A2	9.65E-22	1803.762638	-6.462304966	0.614451387	-10.51719485	7.20E-26	2.16E-23
ENSG00000178803	ADORA2A-AS1	4.31E-24	750.3786009	-7.854766306	0.752303769	-10.44095036	1.61E-25	4.72E-23
ENSG00000125144	MT1G	6.06E-23	904.2037134	-7.316750111	0.703280078	-10.40375	2.38E-25	6.81E-23
ENSG00000187048	CYP4A11	7.76E-48	5472.069814	-10.24553452	0.985174608	-10.39971437	2.49E-25	7.02E-23
ENSG00000140557	ST8SIA2	2.28E-15	746.6176	5.732013041	0.551659183	10.39049692	2.74E-25	7.64E-23
ENSG00000214456	PLIN5	2.38E-21	2439.822443	-5.811519808	0.561737128	-10.34562167	4.38E-25	1.21E-22
ENSG00000181577	C6orf223	8.38E-09	275.0013219	-4.36257355	0.422580117	-10.32366022	5.51E-25	1.50E-22
ENSG00000131482	G6PC1	1.22E-41	4120.33106	-9.161473632	0.893281122	-10.25598035	1.11E-24	2.96E-22
ENSG00000078295	ADCY2	3.29E-10	928.7100921	4.180477536	0.408146031	10.24260244	1.28E-24	3.36E-22
ENSG00000149527	PLCH2	2.60E-16	1305.607189	-5.413665282	0.52887623	-10.23616676	1.37E-24	3.55E-22
ENSG00000004939	SLC4A1	9.41E-31	4719.911605	-7.235117183	0.709908618	-10.19161762	2.16E-24	5.56E-22
ENSG00000132840	BHMT2	1.01E-26	12973.78044	-6.737984503	0.662076064	-10.17705498	2.51E-24	6.39E-22
ENSG00000174502	SLC26A9	2.03E-13	230.3972487	-5.907987039	0.581686261	-10.15665564	3.10E-24	7.79E-22
ENSG00000168398	BDKRB2	6.55E-14	2561.584891	-4.315172553	0.425200796	-10.14855239	3.36E-24	8.38E-22
ENSG00000088882	CPXM1	4.83E-13	16941.13142	4.201000416	0.41744109	10.06369644	7.99E-24	1.95E-21
ENSG00000102935	ZNF423	7.30E-11	4504.025893	3.569785263	0.354858474	10.05974361	8.32E-24	2.01E-21
ENSG00000119711	ALDH6A1	5.38E-14	27173.29177	-4.510912821	0.449125534	-10.04376834	9.79E-24	2.34E-21
ENSG00000155066	PROM2	1.93E-17	7439.846529	-4.954411975	0.494828296	-10.01238615	1.34E-23	3.18E-21
ENSG00000144035	NAT8	5.37E-39	12148.70166	-9.019507554	0.901685758	-10.00293891	1.48E-23	3.43E-21
ENSG00000075340	ADD2	4.25E-26	2619.919149	6.851838718	0.688951184	9.94531815	2.64E-23	6.01E-21
ENSG00000280587	LINC01348	6.53E-07	156.6993186	-3.804078792	0.382767562	-9.938352061	2.83E-23	6.38E-21
ENSG00000163898	LIPH	2.97E-20	509.5255982	-7.698291	0.775255684	-9.930002654	3.08E-23	6.87E-21
ENSG00000005102	MEOX1	3.80E-33	3210.032498	8.093620042	0.815247499	9.927807267	3.15E-23	6.96E-21
ENSG00000164756	SLC30A8	4.38E-17	303.21516	-7.139773486	0.720248728	-9.912927584	3.66E-23	8.00E-21
ENSG00000126562	WNK4	2.39E-20	4392.220383	-5.27203832	0.532633085	-9.898067669	4.24E-23	9.20E-21
ENSG00000143147	GPR161	2.41E-08	3245.77165	3.105491598	0.314813308	9.864549942	5.93E-23	1.27E-20
ENSG00000135127	BICDL1	2.43E-16	13130.02303	-4.728934262	0.479820418	-9.855633667	6.48E-23	1.38E-20
ENSG00000198398	TMEM207	1.61E-22	184.8751877	-10.15507285	1.033678966	-9.824203821	8.86E-23	1.87E-20
ENSG00000179761	PIPOX	8.57E-15	2233.868632	-4.616500435	0.469990487	-9.82254017	9.00E-23	1.88E-20
ENSG00000171759	PAH	1.72E-43	4697.798397	-9.526108627	0.970423219	-9.816447542	9.57E-23	1.98E-20
ENSG00000241186	TDGF1	2.04E-13	291.3077995	-5.875153067	0.599658932	-9.797491134	1.15E-22	2.37E-20
ENSG00000138207	RBP4	1.95E-29	3501.861685	-7.558162401	0.773380004	-9.772896067	1.47E-22	3.00E-20
ENSG00000273983	H3C8	4.62E-21	1397.92471	6.636772411	0.679396529	9.768628676	1.54E-22	3.10E-20
ENSG00000198569	SLC34A3	7.59E-32	1357.5807	-8.994402471	0.924045855	-9.733718754	2.17E-22	4.33E-20
ENSG00000156222	SLC28A1	5.42E-29	3399.189251	-7.157273467	0.735916593	-9.725658501	2.34E-22	4.65E-20
ENSG00000138798	EGF	5.25E-33	20652.24856	-8.106295168	0.834577891	-9.713048068	2.65E-22	5.18E-20
ENSG00000182156	ENPP7	4.26E-13	279.1086875	-5.831738395	0.60153993	-9.69468211	3.18E-22	6.15E-20
ENSG00000053438	NNAT	4.51E-34	2694.373182	8.730337135	0.908638715	9.608150075	7.39E-22	1.41E-19
ENSG00000124253	PCK1	2.44E-29	50887.44699	-7.697968834	0.803176625	-9.584403471	9.30E-22	1.76E-19
ENSG00000138829	FBN2	5.30E-19	5436.327331	5.097890368	0.53196698	9.583095492	9.42E-22	1.76E-19
ENSG00000196754	S100A2	8.88E-21	2756.680197	-5.74091698	0.599169252	-9.581461261	9.57E-22	1.78E-19
ENSG00000204872	NAT8B	7.80E-17	330.5941424	-6.824974648	0.713030891	-9.571779754	1.05E-21	1.92E-19
ENSG00000177133	PRDM16-DT	7.86E-27	9547.487346	-7.585637518	0.792917309	-9.566744767	1.10E-21	2.00E-19
ENSG00000249601	LINC01187	1.14E-29	891.4579798	-9.389842191	0.982090267	-9.56107855	1.17E-21	2.08E-19
ENSG00000241935	HOGA1	1.04E-21	9558.23123	-5.642396613	0.590276319	-9.558907304	1.19E-21	2.11E-19
ENSG00000159261	CLDN14	1.84E-18	399.70651	-7.231644171	0.757872923	-9.542027363	1.40E-21	2.47E-19
ENSG00000158955	WNT9B	6.09E-14	277.5792812	-6.149366681	0.645408614	-9.52786584	1.61E-21	2.81E-19
ENSG00000173253	DMRT2	2.77E-29	3733.420499	-7.92245332	0.83258837	-9.515450382	1.81E-21	3.14E-19
ENSG00000100024	UPB1	3.68E-18	1903.187707	-5.722313233	0.601732932	-9.509722549	1.91E-21	3.29E-19
ENSG00000162069	BICDL2	2.72E-20	934.0795549	-6.544490881	0.688367685	-9.507260477	1.96E-21	3.35E-19
ENSG00000150551	LYPD1	1.01E-26	9031.53086	6.582445319	0.693006427	9.498389999	2.13E-21	3.59E-19
ENSG00000184194	GPR173	8.00E-06	999.6316601	2.868905161	0.30239304	9.487338592	2.37E-21	3.96E-19
ENSG00000166816	LDHD	1.23E-21	2951.923586	-6.135522069	0.648483309	-9.461341536	3.04E-21	5.05E-19
ENSG00000164363	SLC6A18	2.14E-21	553.2114357	-7.624532183	0.807046873	-9.447446535	3.47E-21	5.69E-19
ENSG00000113645	WWC1	1.48E-06	10736.16377	-2.575697225	0.272833912	-9.440531797	3.71E-21	5.99E-19
ENSG00000162365	CYP4A22	6.03E-33	1155.384236	-9.819492809	1.040144549	-9.440507876	3.71E-21	5.99E-19
ENSG00000074416	MGLL	3.40E-07	6486.331265	-2.651680518	0.281145136	-9.431714012	4.03E-21	6.47E-19
ENSG00000126231	PROZ	2.67E-24	538.3491073	-8.762591141	0.931042109	-9.411594875	4.89E-21	7.78E-19
ENSG00000143882	ATP6V1C2	1.53E-14	496.8955369	-5.799853712	0.616656023	-9.405330522	5.19E-21	8.21E-19
ENSG00000139219	COL2A1	4.16E-34	29588.3152	8.76295732	0.935591311	9.366223501	7.52E-21	1.18E-18
ENSG00000143494	VASH2	1.29E-15	1386.153695	5.34722521	0.572273079	9.343834977	9.29E-21	1.45E-18
ENSG00000114115	RBP1	8.42E-10	5980.349991	3.344921325	0.359398504	9.306998471	1.31E-20	2.03E-18
ENSG00000243989	ACY1	8.88E-16	8175.784684	-4.674436295	0.503598572	-9.282068205	1.66E-20	2.53E-18
ENSG00000161992	PRR35	8.18E-19	607.353359	-6.774223242	0.729956657	-9.280308874	1.69E-20	2.55E-18
ENSG00000100031	GGT1	4.47E-16	8033.90882	-4.55584167	0.491721502	-9.265085317	1.95E-20	2.93E-18
ENSG00000115255	REEP6	1.57E-15	1574.988224	-5.076576158	0.552171275	-9.193843267	3.79E-20	5.58E-18
ENSG00000167748	KLK1	3.45E-18	370.7127831	-7.28390206	0.79312195	-9.183836177	4.16E-20	6.09E-18
ENSG00000111424	VDR	1.62E-11	2227.797273	-3.989458026	0.435911912	-9.15198212	5.59E-20	8.13E-18
ENSG00000152092	ASTN1	1.34E-19	1023.569903	6.629685314	0.726686248	9.123174321	7.30E-20	1.05E-17
ENSG00000183784	DOCK8-AS1	7.70E-16	1050.853256	-5.976267091	0.655323837	-9.119563107	7.54E-20	1.08E-17
ENSG00000137204	SLC22A7	4.64E-42	4003.691923	-9.25600026	1.015949322	-9.110690914	8.19E-20	1.16E-17
ENSG00000162433	AK4	1.08E-14	11462.92283	-4.386340547	0.481753698	-9.104944217	8.63E-20	1.21E-17
ENSG00000162873	KLHDC8A	1.10E-11	443.1225092	5.071336307	0.556989596	9.104903115	8.63E-20	1.21E-17
ENSG00000159423	ALDH4A1	1.53E-14	15185.62615	-4.546804268	0.500421754	-9.085944468	1.03E-19	1.43E-17
ENSG00000182327	GLTPD2	8.45E-24	869.1650713	-7.657119696	0.843932377	-9.073143659	1.16E-19	1.60E-17
ENSG00000169855	ROBO1	5.78E-10	6668.840579	3.341402405	0.368706278	9.062504771	1.27E-19	1.76E-17
ENSG00000158014	SLC30A2	4.11E-22	1249.067331	-6.936973102	0.76620488	-9.05367909	1.38E-19	1.88E-17
ENSG00000166183	ASPG	6.87E-24	2855.59173	-6.988022592	0.774047536	-9.027898507	1.75E-19	2.36E-17
ENSG00000167608	TMC4	2.54E-13	2594.354283	-4.248426788	0.47098357	-9.020329073	1.88E-19	2.51E-17
ENSG00000113946	CLDN16	3.02E-21	2003.840415	-6.066497498	0.675154334	-8.985349262	2.58E-19	3.37E-17
ENSG00000196782	MAML3	0.000189417	4854.683676	2.035605506	0.226667147	8.980593475	2.69E-19	3.50E-17
ENSG00000176887	SOX11	2.06E-29	12354.12139	7.379075794	0.82173131	8.979913152	2.71E-19	3.51E-17
ENSG00000227258	SMIM2-AS1	1.46E-09	389.4647687	-4.509793557	0.502321876	-8.977895984	2.76E-19	3.55E-17
ENSG00000274588	DGKK	2.08E-20	700.2233778	7.517945162	0.838031318	8.970959681	2.94E-19	3.76E-17
ENSG00000108187	PBLD	9.28E-15	5841.733341	-4.280191476	0.477334347	-8.966862548	3.05E-19	3.88E-17
ENSG00000081138	CDH7	5.57E-33	1954.302482	9.079611693	1.012708426	8.965672116	3.08E-19	3.90E-17
ENSG00000006042	TMEM98	0.000772439	4353.84428	1.876001546	0.209277662	8.964174818	3.13E-19	3.94E-17
ENSG00000124299	PEPD	2.41E-09	11303.64343	-3.239013853	0.361723847	-8.954382976	3.42E-19	4.27E-17
ENSG00000180432	CYP8B1	1.53E-18	438.616154	-7.101869216	0.793502524	-8.950027252	3.55E-19	4.40E-17
ENSG00000143257	NR1I3	2.32E-14	208.9146563	-6.64965263	0.743956821	-8.938223886	3.95E-19	4.87E-17
ENSG00000135451	TROAP	5.09E-14	568.6678488	5.57151304	0.624960734	8.914980957	4.88E-19	5.95E-17
ENSG00000158816	VWA5B1	8.86E-10	259.0129133	-4.809323819	0.539642449	-8.912056171	5.01E-19	6.08E-17
ENSG00000149452	SLC22A8	6.77E-39	7435.538132	-8.81438452	0.989934918	-8.904004055	5.39E-19	6.50E-17
ENSG00000124839	RAB17	5.74E-20	5954.623919	-5.400612897	0.607684835	-8.887193795	6.27E-19	7.49E-17
ENSG00000163586	FABP1	9.42E-25	827.0305686	-8.017186919	0.902319203	-8.885089546	6.39E-19	7.59E-17
ENSG00000162482	AKR7A3	8.63E-13	1424.522559	-4.521889575	0.50983029	-8.869401576	7.35E-19	8.70E-17
ENSG00000197891	SLC22A12	5.78E-37	11058.41272	-8.487936646	0.958127211	-8.858882771	8.08E-19	9.51E-17
ENSG00000142494	SLC47A1	7.95E-16	5659.846094	-4.489219661	0.506890758	-8.856384918	8.27E-19	9.68E-17
ENSG00000204588	LINC01123	1.65E-11	1363.650422	-4.183926196	0.472464565	-8.855534367	8.33E-19	9.70E-17
ENSG00000165125	TRPV6	2.28E-08	831.028675	-3.600375729	0.406596074	-8.854920064	8.37E-19	9.71E-17
ENSG00000184012	TMPRSS2	2.61E-19	3169.510095	-5.293842223	0.599735381	-8.826963339	1.08E-18	1.23E-16
ENSG00000254528	FXYD6-AS1	1.24E-13	394.1122931	-5.725854452	0.649475147	-8.81612557	1.18E-18	1.35E-16
ENSG00000167703	SLC43A2	1.12E-12	15495.94442	-4.076597236	0.462686407	-8.81071321	1.24E-18	1.41E-16
ENSG00000271824	SMIM32	1.18E-25	2592.310527	-6.735000927	0.766495344	-8.786747347	1.54E-18	1.74E-16
ENSG00000154162	CDH12	1.94E-17	360.6388851	7.036397086	0.802394419	8.769249785	1.80E-18	2.02E-16
ENSG00000167676	PLIN4	6.47E-10	479.6098753	-4.342728042	0.495250553	-8.768749497	1.81E-18	2.02E-16
ENSG00000170099	SERPINA6	5.79E-21	291.5385261	-9.099939407	1.038583815	-8.761872926	1.92E-18	2.13E-16
ENSG00000091137	SLC26A4	1.79E-10	517.8373742	-4.602672994	0.525582188	-8.757284965	2.00E-18	2.21E-16
ENSG00000013016	EHD3	0.000199571	2551.750916	-2.078450327	0.237651194	-8.745802179	2.21E-18	2.43E-16
ENSG00000149948	HMGA2	1.05E-26	5187.768409	6.374795886	0.729112239	8.743229846	2.27E-18	2.47E-16
ENSG00000197444	OGDHL	3.43E-17	15791.7284	-4.898635647	0.560264266	-8.74343759	2.26E-18	2.47E-16
ENSG00000144908	ALDH1L1	4.28E-23	16300.77878	-6.64210102	0.760134268	-8.73806287	2.37E-18	2.57E-16
ENSG00000275379	H3C11	2.53E-18	1450.325613	5.906509577	0.676598331	8.729713494	2.55E-18	2.76E-16
ENSG00000106526	ACTR3C	4.47E-06	1049.10754	-2.84447246	0.326174333	-8.720712114	2.76E-18	2.97E-16
ENSG00000131910	NR0B2	2.04E-13	155.9043644	-6.353192763	0.729058943	-8.714237473	2.93E-18	3.13E-16
ENSG00000142611	PRDM16	1.04E-16	2873.266417	-5.381861049	0.618985881	-8.694642664	3.48E-18	3.69E-16
ENSG00000148408	CACNA1B	1.12E-11	312.395645	5.382143036	0.620001128	8.680860064	3.93E-18	4.12E-16
ENSG00000112984	KIF20A	5.87E-15	903.2387419	6.055648175	0.698808473	8.665676521	4.49E-18	4.69E-16
ENSG00000211452	DIO1	6.56E-30	1568.2066	-8.360202266	0.965466414	-8.659236761	4.75E-18	4.94E-16
ENSG00000114378	HYAL1	3.47E-09	1271.10784	-3.675077707	0.4245827	-8.655740583	4.90E-18	5.07E-16
ENSG00000139194	RBP5	2.76E-16	6056.151227	-4.521112007	0.522764019	-8.648475869	5.22E-18	5.38E-16
ENSG00000177807	KCNJ10	4.58E-17	978.0282022	-5.821274706	0.673177343	-8.647460827	5.27E-18	5.41E-16
ENSG00000177465	ACOT4	1.50E-06	266.8225566	-3.505760072	0.40554075	-8.644655488	5.40E-18	5.52E-16
ENSG00000175772	LINC01106	4.81E-19	3647.812611	-5.250977173	0.609537874	-8.614685648	7.01E-18	7.14E-16
ENSG00000196747	H2AC13	9.88E-22	3104.140531	5.87952167	0.682910475	8.609505766	7.34E-18	7.44E-16
ENSG00000103811	CTSH	4.68E-10	11661.22611	-3.416825623	0.398522013	-8.573743759	1.00E-17	1.01E-15
ENSG00000145217	SLC26A1	1.30E-22	2137.550971	-6.162525806	0.719303773	-8.567348085	1.06E-17	1.06E-15
ENSG00000145428	RNF175	1.23E-13	115.1786359	6.516366174	0.760824421	8.564875142	1.08E-17	1.08E-15
ENSG00000126895	AVPR2	3.01E-16	285.0577503	-6.778553391	0.792293802	-8.555605729	1.17E-17	1.17E-15
ENSG00000135480	KRT7	5.34E-20	5036.598262	-5.165614834	0.604833899	-8.540551118	1.34E-17	1.32E-15
ENSG00000182168	UNC5C	4.16E-16	8147.166859	4.662265008	0.546772015	8.526890336	1.50E-17	1.48E-15
ENSG00000196104	SPOCK3	1.84E-16	534.0134153	6.497000893	0.762281778	8.523096163	1.55E-17	1.52E-15
ENSG00000099860	GADD45B	1.70E-08	16096.30606	-3.17742388	0.373984891	-8.496129005	1.96E-17	1.91E-15
ENSG00000135631	RAB11FIP5	5.34E-09	9567.925892	-3.154327261	0.371823656	-8.483395849	2.19E-17	2.12E-15
ENSG00000278677	H2AC17	4.80E-18	2280.554604	5.484450917	0.646847341	8.478740765	2.28E-17	2.19E-15
ENSG00000006283	CACNA1G	1.61E-15	1306.027735	5.247956147	0.619078155	8.477049477	2.31E-17	2.22E-15
ENSG00000204610	TRIM15	9.32E-19	550.3610469	-6.829466122	0.806935891	-8.463455648	2.60E-17	2.48E-15
ENSG00000165140	FBP1	1.73E-21	3618.469504	-5.629452051	0.665580485	-8.457958398	2.72E-17	2.59E-15
ENSG00000172940	SLC22A13	1.16E-16	1560.579929	-5.286457009	0.625230623	-8.455211272	2.79E-17	2.64E-15
ENSG00000050628	PTGER3	5.73E-20	4643.641481	-5.427219447	0.643152665	-8.438462185	3.22E-17	3.02E-15
ENSG00000157782	CABP1	1.81E-07	411.7370809	-3.718859633	0.44168803	-8.419652293	3.78E-17	3.51E-15
ENSG00000110887	DAO	1.30E-23	1078.623234	-7.301196372	0.86793459	-8.412150476	4.03E-17	3.73E-15
ENSG00000140859	KIFC3	1.18E-08	12650.38375	-3.160704851	0.375823656	-8.410074242	4.10E-17	3.78E-15
ENSG00000099869	IGF2-AS	1.86E-19	1647.471249	6.003905097	0.714142181	8.407156529	4.20E-17	3.84E-15
ENSG00000174460	ZCCHC12	3.26E-19	659.4166927	7.374185125	0.877606585	8.402609157	4.37E-17	3.98E-15
ENSG00000102890	ELMO3	9.26E-12	1605.74468	-4.245335691	0.505725906	-8.394538702	4.68E-17	4.25E-15
ENSG00000149294	NCAM1	2.55E-16	9443.056619	4.727733952	0.563922464	8.383659556	5.13E-17	4.64E-15
ENSG00000196787	H2AC11	1.28E-19	4271.303777	5.288702231	0.631909312	8.369400687	5.79E-17	5.20E-15
ENSG00000164325	TMEM174	4.19E-30	1595.925666	-8.515620723	1.018641682	-8.359780354	6.28E-17	5.62E-15
ENSG00000117724	CENPF	8.16E-23	9952.711221	6.22724906	0.744960022	8.359172138	6.32E-17	5.62E-15
ENSG00000164619	BMPER	8.47E-27	3588.740023	6.81989056	0.818701499	8.330130779	8.08E-17	7.16E-15
ENSG00000253958	CLDN23	3.04E-14	1264.47867	-4.889265725	0.588189049	-8.312405227	9.38E-17	8.29E-15
ENSG00000185133	INPP5J	3.95E-08	1416.823024	-3.3181922	0.400260081	-8.290090258	1.13E-16	9.96E-15
ENSG00000185130	H2BC13	6.89E-21	1466.754187	6.569159334	0.792574416	8.288381766	1.15E-16	1.01E-14
ENSG00000180251	SLC9A4	2.78E-14	389.9320101	-6.034547072	0.729508809	-8.272068821	1.32E-16	1.15E-14
ENSG00000042062	RIPOR3	4.68E-14	3697.687343	-4.329013109	0.524103039	-8.259851182	1.46E-16	1.26E-14
ENSG00000067445	TRO	1.34E-05	2860.29458	2.471539988	0.299375445	8.255653663	1.51E-16	1.31E-14
ENSG00000156413	FUT6	1.04E-26	4005.407879	-6.655907819	0.806646328	-8.251333436	1.57E-16	1.35E-14
ENSG00000170561	IRX2	5.40E-19	1073.287453	-6.100041622	0.741120273	-8.230838964	1.86E-16	1.59E-14
ENSG00000016391	CHDH	1.60E-10	5446.58448	-3.367073111	0.409577912	-8.220836644	2.02E-16	1.73E-14
ENSG00000164611	PTTG1	2.70E-10	519.893278	4.561360789	0.555024225	8.218309365	2.06E-16	1.76E-14
ENSG00000277775	H3C7	6.20E-13	697.5575111	5.140543349	0.625642757	8.216419502	2.10E-16	1.78E-14
ENSG00000183242	WT1-AS	1.20E-09	2498.691728	3.443145581	0.419097639	8.215616749	2.11E-16	1.78E-14
ENSG00000241697	TMEFF1	7.04E-12	833.7473145	4.704874412	0.576360477	8.163076062	3.27E-16	2.74E-14
ENSG00000115112	TFCP2L1	6.15E-17	13772.82773	-4.815318794	0.590543412	-8.1540471	3.52E-16	2.94E-14
ENSG00000244474	UGT1A4	9.60E-15	222.6645742	-6.429815543	0.789640318	-8.142714342	3.87E-16	3.21E-14
ENSG00000137819	PAQR5	1.04E-20	5068.222165	-5.406574344	0.664111429	-8.141065056	3.92E-16	3.24E-14
ENSG00000143320	CRABP2	2.75E-21	10592.66563	5.639965152	0.693182006	8.136340963	4.07E-16	3.36E-14
ENSG00000099994	SUSD2	7.53E-22	8499.432259	-5.928557903	0.729669739	-8.124988042	4.47E-16	3.68E-14
ENSG00000130529	TRPM4	1.17E-08	3693.325211	-3.032347071	0.373288133	-8.123341733	4.54E-16	3.71E-14
ENSG00000160951	PTGER1	5.28E-15	794.3024626	-5.342030287	0.657670366	-8.122656219	4.56E-16	3.72E-14
ENSG00000183018	SPNS2	1.82E-17	6025.892324	-4.754540041	0.585970967	-8.113951556	4.90E-16	3.98E-14
ENSG00000165272	AQP3	1.83E-12	4663.417534	-3.757415763	0.463192467	-8.111996706	4.98E-16	4.03E-14
ENSG00000165887	ANKRD2	8.56E-14	564.5340021	-5.332610716	0.658182401	-8.102025682	5.41E-16	4.35E-14
ENSG00000154274	C4orf19	6.58E-07	453.3254653	-3.520830454	0.434731868	-8.098855209	5.55E-16	4.45E-14
ENSG00000140832	MARVELD3	4.73E-13	2039.014089	-4.246943668	0.524656666	-8.094710208	5.74E-16	4.57E-14
ENSG00000150275	PCDH15	4.20E-24	1784.995628	7.219383671	0.892605192	8.087992018	6.07E-16	4.81E-14
ENSG00000143674	MAP3K21	4.09E-05	2866.276564	-2.234194824	0.276509699	-8.079987182	6.48E-16	5.12E-14
ENSG00000105929	ATP6V0A4	3.57E-27	3361.365751	-6.881382422	0.852003551	-8.076706271	6.65E-16	5.25E-14
ENSG00000167363	FN3K	1.77E-10	5647.805659	-3.444649686	0.426537891	-8.075835125	6.70E-16	5.27E-14
ENSG00000103089	FA2H	2.71E-08	230.184124	-4.271041449	0.529492367	-8.066294646	7.25E-16	5.67E-14
ENSG00000138944	SHISAL1	4.68E-07	658.1902021	3.466262467	0.430243277	8.056517442	7.85E-16	6.13E-14
ENSG00000160606	TLCD1	0.000179321	151.9263126	-2.793708404	0.347065446	-8.049514677	8.31E-16	6.47E-14
ENSG00000152953	STK32B	2.04E-09	1218.378819	-3.698765137	0.46027688	-8.035956829	9.29E-16	7.20E-14
ENSG00000130513	GDF15	5.99E-16	6022.776827	-4.465603581	0.557144655	-8.015160044	1.10E-15	8.44E-14
ENSG00000130956	HABP4	0.002288758	2770.291507	-1.71787451	0.214575973	-8.005903398	1.19E-15	9.08E-14
ENSG00000167705	RILP	1.39E-10	1142.829985	-4.087081549	0.511944362	-7.983448691	1.42E-15	1.08E-13
ENSG00000101276	SLC52A3	9.56E-09	517.4189503	-4.058976146	0.509673788	-7.963870691	1.67E-15	1.26E-13
ENSG00000237649	KIFC1	1.55E-15	1717.542238	5.10094401	0.641050693	7.957161686	1.76E-15	1.33E-13
ENSG00000088325	TPX2	9.95E-18	2658.848107	5.378429315	0.676369432	7.951910692	1.84E-15	1.38E-13
ENSG00000235366	LINC01055	9.31E-15	159.6713276	-6.765358659	0.851551961	-7.944739687	1.95E-15	1.46E-13
ENSG00000129195	PIMREG	1.16E-15	787.5755901	5.709919963	0.719881702	7.931747596	2.16E-15	1.61E-13
ENSG00000179918	SEPHS2	0.000165972	6461.555777	-1.968481655	0.248244169	-7.929618895	2.20E-15	1.63E-13
ENSG00000152779	SLC16A12	6.44E-20	4055.81862	-5.51602594	0.696444859	-7.92026227	2.37E-15	1.75E-13
ENSG00000183873	SCN5A	1.61E-07	434.6335338	4.043310469	0.510521548	7.919960452	2.38E-15	1.75E-13
ENSG00000196230	TUBB	2.03E-06	44296.05001	2.773550259	0.350255996	7.918637492	2.40E-15	1.77E-13
ENSG00000158815	FGF17	2.10E-07	365.7463287	3.795788898	0.479914631	7.909300215	2.59E-15	1.90E-13
ENSG00000154025	SLC5A10	1.43E-27	2636.532829	-7.010928208	0.887012201	-7.903981703	2.70E-15	1.98E-13
ENSG00000242419	PCDHGC4	2.45E-05	475.7152585	2.964924736	0.375228169	7.901658203	2.75E-15	2.01E-13
ENSG00000274997	H2AC12	6.37E-16	1799.67743	5.173568898	0.655108492	7.897270394	2.85E-15	2.07E-13
ENSG00000117399	CDC20	7.11E-13	621.8083142	5.207602286	0.659689035	7.894025835	2.93E-15	2.11E-13
ENSG00000115194	SLC30A3	6.77E-14	289.6576523	6.092676738	0.77213051	7.890734347	3.00E-15	2.16E-13
ENSG00000167244	IGF2	1.94E-12	215008.9753	4.457666429	0.565503513	7.88265029	3.21E-15	2.30E-13
ENSG00000141854	MISP3	9.81E-12	1533.637458	-4.154726759	0.527343664	-7.878594253	3.31E-15	2.36E-13
ENSG00000131153	GINS2	4.58E-09	615.3222045	4.163066678	0.528550242	7.876387805	3.37E-15	2.40E-13
ENSG00000178828	RNF186	1.69E-22	445.3216845	-8.373972514	1.063421073	-7.874559501	3.42E-15	2.43E-13
ENSG00000118094	TREH	1.26E-15	453.1187212	-6.158094961	0.78406744	-7.854037358	4.03E-15	2.83E-13
ENSG00000123388	HOXC11	2.81E-15	1030.730512	5.361090778	0.682620451	7.85369201	4.04E-15	2.83E-13
ENSG00000117280	RAB29	1.47E-10	4378.379503	-3.402177062	0.433453601	-7.848999419	4.19E-15	2.93E-13
ENSG00000171174	RBKS	1.72E-07	1165.52763	-3.218351584	0.410485812	-7.84034793	4.49E-15	3.13E-13
ENSG00000146670	CDCA5	3.68E-12	1186.019028	4.503532139	0.57468164	7.836568672	4.63E-15	3.22E-13
ENSG00000065328	MCM10	4.25E-15	712.0371012	5.979409288	0.763357442	7.833039884	4.76E-15	3.30E-13
ENSG00000178038	ALS2CL	2.52E-11	5657.730163	-3.673463301	0.469324756	-7.827124506	4.99E-15	3.45E-13
ENSG00000183844	FAM3B	6.77E-08	190.4443693	-4.091629801	0.522815668	-7.826142272	5.03E-15	3.46E-13
ENSG00000182636	NDN	0.000843097	1575.184142	2.101815429	0.268846763	7.817893741	5.37E-15	3.69E-13
ENSG00000100362	PVALB	1.09E-13	361.2308131	-5.730143404	0.734002461	-7.806708712	5.87E-15	4.02E-13
ENSG00000285662	FAM245B	7.13E-18	232.3347295	-7.558410585	0.970059061	-7.791701445	6.61E-15	4.51E-13
ENSG00000153132	CLGN	2.05E-11	253.6647863	5.396052804	0.692608221	7.790916487	6.65E-15	4.53E-13
ENSG00000164303	ENPP6	8.19E-20	1035.929181	-6.379271037	0.819953147	-7.78004336	7.25E-15	4.91E-13
ENSG00000117791	MTARC2	2.71E-07	3601.876656	-2.769677176	0.356151572	-7.776681026	7.45E-15	5.02E-13
ENSG00000135638	EMX1	1.26E-21	3142.116698	-5.856422572	0.753275223	-7.774611978	7.57E-15	5.09E-13
ENSG00000171766	GATM	1.81E-15	21770.48123	-4.668472431	0.60056246	-7.773500247	7.63E-15	5.12E-13
ENSG00000162391	FAM151A	9.01E-38	8607.895728	-8.493841975	1.092726989	-7.773068715	7.66E-15	5.13E-13
ENSG00000275591	XKR5	4.84E-10	316.2591543	4.783512728	0.615812017	7.767813228	7.99E-15	5.33E-13
ENSG00000102003	SYP	0.005730589	340.997586	-2.019021468	0.260296489	-7.756621975	8.72E-15	5.80E-13
ENSG00000184702	SEPTIN5	0.001073671	1218.725663	2.09381318	0.269991435	7.755109637	8.83E-15	5.86E-13
ENSG00000116016	EPAS1	8.06E-05	15524.09617	-2.179364689	0.281079301	-7.753558098	8.94E-15	5.91E-13
ENSG00000130595	TNNT3	5.89E-17	867.9226187	6.409602909	0.826901984	7.751345424	9.09E-15	6.00E-13
ENSG00000163501	IHH	1.56E-13	294.9346529	-5.886754328	0.759502306	-7.750805078	9.13E-15	6.01E-13
ENSG00000143001	TMEM61	9.99E-09	184.237535	-4.877781996	0.629762386	-7.745432407	9.53E-15	6.23E-13
ENSG00000145708	CRHBP	4.20E-11	495.4856278	-4.946769559	0.639603528	-7.734118624	1.04E-14	6.79E-13
ENSG00000132470	ITGB4	4.04E-07	2006.019435	-2.88584144	0.37323774	-7.731912218	1.06E-14	6.89E-13
ENSG00000175832	ETV4	4.36E-27	4468.548876	6.593536188	0.853016668	7.729668645	1.08E-14	6.99E-13
ENSG00000149970	CNKSR2	1.19E-09	196.3050099	4.820107402	0.623931191	7.725382977	1.12E-14	7.21E-13
ENSG00000175806	MSRA	3.63E-08	2087.106777	-3.156845326	0.409026857	-7.717941425	1.18E-14	7.63E-13
ENSG00000237361	TUSC8	5.08E-09	116.3867555	4.671095816	0.605928855	7.708983948	1.27E-14	8.11E-13
ENSG00000179023	KLHDC7A	5.83E-12	2531.511471	-3.932260641	0.510295324	-7.70585278	1.30E-14	8.29E-13
ENSG00000111012	CYP27B1	1.31E-09	576.9469915	-4.293177692	0.557275636	-7.703867562	1.32E-14	8.40E-13
ENSG00000149256	TENM4	5.98E-08	7660.724735	2.952395534	0.383271403	7.703145898	1.33E-14	8.40E-13
ENSG00000166828	SCNN1G	1.04E-21	2195.71202	-6.100640182	0.791957333	-7.703243504	1.33E-14	8.40E-13
ENSG00000155465	SLC7A7	2.37E-11	4064.294518	-3.637975975	0.472931955	-7.69238775	1.44E-14	9.07E-13
ENSG00000185942	NKAIN3	1.13E-11	425.5918521	5.44709379	0.708278605	7.690608967	1.46E-14	9.17E-13
ENSG00000185499	MUC1	1.32E-16	4170.849487	-4.714265455	0.613228687	-7.687614023	1.50E-14	9.36E-13
ENSG00000111319	SCNN1A	4.82E-17	11092.78319	-4.795087954	0.62448849	-7.678424867	1.61E-14	1.00E-12
ENSG00000148773	MKI67	8.18E-19	8131.81113	5.336776116	0.695154828	7.677104299	1.63E-14	1.01E-12
ENSG00000187783	TMEM72	4.11E-14	2734.764557	-4.350531394	0.566982411	-7.673132908	1.68E-14	1.04E-12
ENSG00000112280	COL9A1	1.20E-15	3411.156463	4.582187402	0.597214923	7.672593609	1.69E-14	1.04E-12
ENSG00000165821	SALL2	2.97E-06	5403.492906	2.54221853	0.331540123	7.66790609	1.75E-14	1.07E-12
ENSG00000116254	CHD5	2.20E-06	307.008126	-3.480751753	0.454412085	-7.659901376	1.86E-14	1.14E-12
ENSG00000198910	L1CAM	2.95E-11	3932.408857	-3.632653141	0.474361628	-7.6579827	1.89E-14	1.15E-12
ENSG00000113368	LMNB1	5.58E-14	4547.520741	4.228112071	0.552465695	7.653166716	1.96E-14	1.19E-12
ENSG00000179915	NRXN1	1.58E-20	2588.102793	5.809844979	0.759248475	7.652099631	1.98E-14	1.20E-12
ENSG00000273703	H2BC14	5.22E-16	624.9615697	6.188556565	0.808770368	7.651809226	1.98E-14	1.20E-12
ENSG00000015413	DPEP1	2.25E-18	13600.99855	-5.056884887	0.661460528	-7.645028957	2.09E-14	1.26E-12
ENSG00000244122	UGT1A7	1.13E-22	528.2609455	-8.767315485	1.147846376	-7.638056509	2.21E-14	1.32E-12
ENSG00000089685	BIRC5	3.93E-15	1476.018941	5.123818129	0.671683103	7.628326671	2.38E-14	1.42E-12
ENSG00000174469	CNTNAP2	6.17E-13	2552.297478	4.415499891	0.579091534	7.624873842	2.44E-14	1.46E-12
ENSG00000167755	KLK6	2.70E-12	2418.807869	4.044565344	0.530601161	7.622609305	2.49E-14	1.48E-12
ENSG00000146001	PCDHB18P	1.00E-06	663.8923205	3.31010259	0.435038579	7.608756437	2.77E-14	1.64E-12
ENSG00000103067	ESRP2	2.60E-06	2052.081513	-2.698065897	0.354679292	-7.607057873	2.80E-14	1.65E-12
ENSG00000102302	FGD1	0.001123276	1819.105594	2.001957377	0.263593481	7.594866797	3.08E-14	1.80E-12
ENSG00000066032	CTNNA2	1.76E-09	119.2913425	4.920355981	0.648377947	7.588715812	3.23E-14	1.88E-12
ENSG00000104689	TNFRSF10A	0.000558784	579.9851967	-2.36818115	0.3122741	-7.583661758	3.36E-14	1.95E-12
ENSG00000135414	GDF11	3.91E-07	2749.013987	2.855817848	0.376828026	7.578570724	3.49E-14	2.02E-12
ENSG00000175063	UBE2C	2.54E-14	466.1968616	6.068774987	0.801128068	7.575286935	3.58E-14	2.07E-12
ENSG00000162551	ALPL	4.53E-13	2758.776017	-4.27162237	0.564299903	-7.569773358	3.74E-14	2.15E-12
ENSG00000125869	LAMP5	4.46E-25	2327.875863	6.875296618	0.909328015	7.560854282	4.00E-14	2.28E-12
ENSG00000186493	C5orf38	5.33E-17	370.5368437	-6.768669509	0.896768588	-7.547844115	4.43E-14	2.52E-12
ENSG00000213420	GPC2	3.43E-17	1783.048887	5.432771541	0.720204632	7.543372123	4.58E-14	2.60E-12
ENSG00000165194	PCDH19	0.00013035	412.6436155	2.731366968	0.362202039	7.541003844	4.66E-14	2.64E-12
ENSG00000160801	PTH1R	8.51E-15	10036.47863	-4.632375327	0.614936446	-7.533096075	4.96E-14	2.80E-12
ENSG00000183598	H3C13	5.02E-15	1373.097316	5.115646494	0.679314387	7.530602311	5.05E-14	2.84E-12
ENSG00000102934	PLLP	7.03E-11	1445.897143	-3.954346403	0.525415821	-7.52612739	5.23E-14	2.93E-12
ENSG00000133710	SPINK5	3.62E-09	697.0209991	4.056467954	0.539430403	7.519909766	5.48E-14	3.07E-12
ENSG00000187867	PALM3	2.17E-11	3224.843243	-3.768983811	0.501645676	-7.513238905	5.77E-14	3.22E-12
ENSG00000115468	EFHD1	1.01E-09	11944.27763	-3.370998542	0.449235983	-7.503848028	6.20E-14	3.46E-12
ENSG00000187621	TCL6	1.19E-10	1365.782811	-4.206957757	0.560778179	-7.501999752	6.29E-14	3.50E-12
ENSG00000174705	SH3PXD2B	2.41E-05	3836.81503	2.334205563	0.311420438	7.495351236	6.61E-14	3.67E-12
ENSG00000256546	LINC02985	8.00E-06	245.9844543	3.300874332	0.440595338	7.491850331	6.79E-14	3.76E-12
ENSG00000278463	H2AC4	2.23E-13	916.0867428	5.037047404	0.672571398	7.489238199	6.93E-14	3.83E-12
ENSG00000093009	CDC45	2.54E-13	332.6388679	6.026985689	0.804874762	7.488103702	6.99E-14	3.85E-12
ENSG00000174358	SLC6A19	4.92E-29	12918.7556	-7.120476423	0.951766098	-7.481330166	7.36E-14	4.03E-12
ENSG00000276903	H2AC16	6.17E-15	840.850387	5.493800737	0.734393412	7.480732603	7.39E-14	4.03E-12
ENSG00000275221	H2AC15	5.73E-10	847.2351154	4.161271601	0.556394062	7.47900074	7.49E-14	4.08E-12
ENSG00000120324	PCDHB10	4.76E-07	1148.646424	3.219774217	0.430551663	7.478252884	7.53E-14	4.09E-12
ENSG00000053918	KCNQ1	5.82E-07	2424.443999	-2.79688589	0.374094984	-7.476405748	7.64E-14	4.14E-12
ENSG00000143367	TUFT1	2.00E-09	4720.490412	-3.174931087	0.42484798	-7.473099162	7.83E-14	4.24E-12
ENSG00000165828	PRAP1	1.20E-25	1688.880072	-7.180079372	0.961102902	-7.470666625	7.98E-14	4.30E-12
ENSG00000012223	LTF	5.61E-29	23011.53122	-8.02010726	1.0745139	-7.463939983	8.40E-14	4.51E-12
ENSG00000203811	H3C14	1.71E-20	4546.772235	5.683056241	0.762273514	7.455402992	8.96E-14	4.80E-12
ENSG00000106236	NPTX2	1.95E-29	2216.027832	7.829580714	1.050697903	7.451790559	9.21E-14	4.92E-12
ENSG00000109684	CLNK	4.07E-09	258.0909776	-4.58677666	0.616641587	-7.438318715	1.02E-13	5.44E-12
ENSG00000134569	LRP4	3.94E-09	6407.63235	3.175914413	0.427073342	7.43646137	1.03E-13	5.50E-12
ENSG00000198901	PRC1	2.02E-10	1832.014234	3.943152812	0.53137775	7.42062085	1.17E-13	6.18E-12
ENSG00000148942	SLC5A12	9.71E-25	8791.893472	-6.186510461	0.834166379	-7.416398714	1.20E-13	6.36E-12
ENSG00000163435	ELF3	2.29E-13	10981.08408	-4.078026322	0.550167038	-7.412342139	1.24E-13	6.54E-12
ENSG00000156970	BUB1B	1.48E-13	1203.184392	4.897778262	0.66083477	7.41150207	1.25E-13	6.57E-12
ENSG00000179241	LDLRAD3	0.000122416	681.5153593	2.604852805	0.351620443	7.408138113	1.28E-13	6.71E-12
ENSG00000167701	GPT	3.49E-14	2529.374907	-4.46501955	0.603335467	-7.400558714	1.36E-13	7.09E-12
ENSG00000176945	MUC20	4.64E-07	1357.97054	-3.013973857	0.407862308	-7.389684707	1.47E-13	7.66E-12
ENSG00000170681	CAVIN4	3.20E-07	312.9146775	3.829259281	0.518782169	7.381246911	1.57E-13	8.14E-12
ENSG00000073350	LLGL2	1.23E-08	7872.951008	-3.016237985	0.408995685	-7.374742808	1.65E-13	8.51E-12
ENSG00000100867	DHRS2	4.42E-14	800.1648151	5.218834744	0.707971403	7.371533258	1.69E-13	8.70E-12
ENSG00000101445	PPP1R16B	2.10E-10	5235.156936	-3.410399482	0.462858797	-7.368120695	1.73E-13	8.91E-12
ENSG00000167165	UGT1A6	1.52E-19	1042.961606	-6.400242874	0.870646516	-7.351138216	1.97E-13	1.00E-11
ENSG00000267795	SMIM22	4.03E-10	118.5908316	-5.381047693	0.73212606	-7.349892299	1.98E-13	1.01E-11
ENSG00000090889	KIF4A	1.69E-15	1291.440648	5.31457807	0.723241058	7.348280372	2.01E-13	1.02E-11
ENSG00000119121	TRPM6	1.04E-09	573.0178293	-4.238597673	0.576808629	-7.348360374	2.01E-13	1.02E-11
ENSG00000184661	CDCA2	1.09E-11	760.6545513	4.714978935	0.642515608	7.338310351	2.16E-13	1.10E-11
ENSG00000197249	SERPINA1	9.48E-11	4904.612801	-3.493249596	0.476450036	-7.331827756	2.27E-13	1.15E-11
ENSG00000158246	TENT5B	1.81E-08	1066.116284	-3.479010367	0.47468575	-7.329081123	2.32E-13	1.17E-11
ENSG00000254726	MEX3A	6.96E-16	5970.867243	4.575887116	0.625391893	7.316831518	2.54E-13	1.28E-11
ENSG00000131747	TOP2A	1.91E-22	4677.455432	6.176870629	0.844336069	7.315654104	2.56E-13	1.29E-11
ENSG00000142945	KIF2C	2.47E-13	928.2808352	5.197873354	0.710971896	7.310940673	2.65E-13	1.33E-11
ENSG00000159200	RCAN1	2.45E-07	4871.299636	-2.690335984	0.368001335	-7.310669095	2.66E-13	1.33E-11
ENSG00000034053	APBA2	9.53E-15	2280.299885	4.657933681	0.637303746	7.308812652	2.70E-13	1.35E-11
ENSG00000073670	ADAM11	0.000135005	334.0436641	2.821193457	0.386920272	7.291407721	3.07E-13	1.52E-11
ENSG00000124602	UNC5CL	3.92E-11	2968.880996	-3.756563345	0.515280393	-7.290328516	3.09E-13	1.53E-11
ENSG00000134864	GGACT	1.48E-11	1806.996526	-4.12114093	0.565438699	-7.288395612	3.14E-13	1.55E-11
ENSG00000111206	FOXM1	6.09E-13	1178.885138	4.774178523	0.655388766	7.28449856	3.23E-13	1.59E-11
ENSG00000122694	GLIPR2	5.17E-07	1875.149349	2.983192247	0.409867068	7.278438505	3.38E-13	1.66E-11
ENSG00000102032	RENBP	5.55E-08	3808.961111	-2.95686134	0.406409943	-7.275563475	3.45E-13	1.69E-11
ENSG00000167771	RCOR2	4.26E-13	1349.498486	4.668473035	0.641713755	7.275008515	3.46E-13	1.69E-11
ENSG00000166347	CYB5A	9.90E-07	5188.761453	-2.588245755	0.356011603	-7.270116285	3.59E-13	1.75E-11
ENSG00000154920	EME1	4.61E-08	189.1215037	4.318882293	0.594114574	7.269443444	3.61E-13	1.76E-11
ENSG00000198695	MT-ND6	3.83E-07	14210.98421	-2.761777606	0.379958116	-7.26863697	3.63E-13	1.76E-11
ENSG00000197355	UAP1L1	2.22E-08	3027.183347	-3.059203258	0.421028737	-7.266020081	3.70E-13	1.79E-11
ENSG00000178999	AURKB	1.31E-15	685.8693885	5.926937021	0.816569345	7.258338872	3.92E-13	1.89E-11
ENSG00000167434	CA4	1.73E-09	808.0202169	-3.939009905	0.543575414	-7.246482837	4.28E-13	2.06E-11
ENSG00000276644	DACH1	4.04E-06	6340.764895	2.449184036	0.338025925	7.245550865	4.31E-13	2.07E-11
ENSG00000174885	NLRP6	3.26E-10	388.2018763	-4.633873207	0.639668776	-7.244176016	4.35E-13	2.08E-11
ENSG00000185022	MAFF	6.33E-08	10456.28921	-2.905212444	0.401037973	-7.244232811	4.35E-13	2.08E-11
ENSG00000118898	PPL	1.45E-06	8741.142536	-2.539162236	0.350545501	-7.243459774	4.37E-13	2.09E-11
ENSG00000136574	GATA4	9.46E-21	290.6501652	8.844668993	1.222168241	7.236866983	4.59E-13	2.19E-11
ENSG00000233822	H2BC15	7.18E-10	1578.878011	3.822426602	0.528631229	7.230799836	4.80E-13	2.28E-11
ENSG00000169071	ROR2	1.23E-08	3762.330825	3.139201388	0.434282078	7.228484778	4.88E-13	2.31E-11
ENSG00000274641	H2BC17	5.41E-17	651.9568397	6.672072901	0.923123618	7.227713355	4.91E-13	2.32E-11
ENSG00000170085	SIMC1	0.030338436	619.6722575	1.609254086	0.222666471	7.227195345	4.93E-13	2.32E-11
ENSG00000132938	MTUS2	1.76E-10	326.8615009	4.942870185	0.684467389	7.221483833	5.14E-13	2.41E-11
ENSG00000008083	JARID2	0.000669928	7386.800283	1.885673579	0.26126088	7.217588718	5.29E-13	2.48E-11
ENSG00000115718	PROC	5.87E-15	812.1781345	-5.370955573	0.744225095	-7.216842876	5.32E-13	2.49E-11
ENSG00000166825	ANPEP	6.40E-18	17073.0202	-5.057003224	0.700763965	-7.216414482	5.34E-13	2.49E-11
ENSG00000118193	KIF14	4.67E-10	518.3236723	4.59708562	0.637146417	7.215116489	5.39E-13	2.51E-11
ENSG00000168447	SCNN1B	1.84E-17	855.409752	-5.977119721	0.829389786	-7.206647368	5.73E-13	2.66E-11
ENSG00000119715	ESRRB	1.16E-09	865.8825046	-3.962822701	0.550058469	-7.204366311	5.83E-13	2.70E-11
ENSG00000245750	DRAIC	1.24E-06	325.250607	-3.495672091	0.485252677	-7.203818246	5.85E-13	2.71E-11
ENSG00000089250	NOS1	1.89E-10	855.9464309	-4.13837343	0.574666339	-7.201349983	5.96E-13	2.75E-11
ENSG00000113296	THBS4	4.75E-11	1978.950469	4.071589013	0.56556125	7.199200811	6.06E-13	2.79E-11
ENSG00000143228	NUF2	9.67E-11	362.315225	4.987001644	0.693031414	7.19592437	6.20E-13	2.85E-11
ENSG00000143891	GALM	1.22E-07	4919.937345	-2.851138863	0.396620825	-7.188575794	6.55E-13	3.00E-11
ENSG00000137364	TPMT	2.43E-06	2642.067347	-2.62203998	0.364846572	-7.186692106	6.64E-13	3.04E-11
ENSG00000126787	DLGAP5	2.63E-13	544.0088318	5.84384262	0.814068832	7.178560816	7.04E-13	3.22E-11
ENSG00000148671	ADIRF	9.79E-11	1071.405117	-4.28331011	0.597275411	-7.171415447	7.42E-13	3.37E-11
ENSG00000129810	SGO1	2.24E-08	298.2622065	4.25755949	0.593853294	7.169379263	7.53E-13	3.42E-11
ENSG00000135097	MSI1	3.02E-09	2048.155364	3.517710217	0.490748032	7.16805772	7.61E-13	3.45E-11
ENSG00000246082	NUDT16L2P	1.58E-05	143.9038566	-3.237605552	0.452044142	-7.162144698	7.94E-13	3.58E-11
ENSG00000101049	SGK2	1.55E-09	2164.004559	-3.473723789	0.485144417	-7.160185021	8.06E-13	3.63E-11
ENSG00000184613	NELL2	1.42E-11	808.2535245	4.705842157	0.657444247	7.157781332	8.20E-13	3.69E-11
ENSG00000138678	GPAT3	9.75E-16	4379.916379	-4.581018707	0.640205703	-7.155541857	8.33E-13	3.72E-11
ENSG00000052344	PRSS8	8.12E-10	2754.861355	-3.363032812	0.470372346	-7.149724774	8.70E-13	3.87E-11
ENSG00000066279	ASPM	2.17E-14	1597.667027	5.05964738	0.708033215	7.146059358	8.93E-13	3.97E-11
ENSG00000100311	PDGFB	0.000267919	3108.5352	-2.016389482	0.282255225	-7.143851747	9.08E-13	4.01E-11
ENSG00000187122	SLIT1	5.18E-23	2221.949948	6.411336774	0.897450572	7.143944161	9.07E-13	4.01E-11
ENSG00000186301	MST1P2	1.05E-06	599.428863	-3.329543923	0.466147432	-7.142684253	9.15E-13	4.03E-11
ENSG00000198826	ARHGAP11A	2.04E-09	1606.572865	3.661143717	0.512576064	7.142634961	9.16E-13	4.03E-11
ENSG00000080493	SLC4A4	7.07E-15	13096.6497	-4.495325643	0.629556751	-7.140461336	9.30E-13	4.09E-11
ENSG00000123485	HJURP	1.29E-11	488.9996601	5.21923039	0.731406272	7.135884109	9.62E-13	4.20E-11
ENSG00000144730	IL17RD	1.10E-05	12810.583	2.434808029	0.341686938	7.125844627	1.03E-12	4.51E-11
ENSG00000177839	PCDHB9	1.67E-07	1720.049592	3.207396875	0.45043669	7.120638579	1.07E-12	4.68E-11
ENSG00000130812	ANGPTL6	7.12E-11	251.3243421	5.101005153	0.716773982	7.116615947	1.11E-12	4.80E-11
ENSG00000152208	GRID2	3.31E-15	547.1732008	5.96854646	0.839211064	7.112092194	1.14E-12	4.95E-11
ENSG00000176974	SHMT1	8.58E-08	11940.79296	-2.953706832	0.41537054	-7.111016657	1.15E-12	4.98E-11
ENSG00000172733	PURG	9.85E-05	309.9869104	2.894902773	0.407316814	7.107250858	1.18E-12	5.10E-11
ENSG00000229719	MIR194-2HG	4.81E-08	203.3937001	-4.130425268	0.581762523	-7.099847627	1.25E-12	5.38E-11
ENSG00000198597	ZNF536	1.93E-10	614.5231828	4.454598578	0.628104013	7.092135201	1.32E-12	5.65E-11
ENSG00000142748	FCN3	5.58E-05	198.1277888	-3.078219509	0.43408436	-7.091293291	1.33E-12	5.68E-11
ENSG00000272674	PCDHB16	1.50E-07	2456.455603	3.091303567	0.436676174	7.079167018	1.45E-12	6.17E-11
ENSG00000165480	SKA3	1.38E-07	147.0980765	4.112009195	0.580898075	7.078710316	1.46E-12	6.18E-11
ENSG00000183421	RIPK4	0.000195722	5290.325648	-1.945273307	0.275287668	-7.066329276	1.59E-12	6.72E-11
ENSG00000158865	SLC5A11	1.24E-11	356.7420673	-5.135421645	0.72705569	-7.063312641	1.63E-12	6.86E-11
ENSG00000171017	LRRC8E	9.20E-06	563.4419965	-2.972626822	0.421430837	-7.053652838	1.74E-12	7.33E-11
ENSG00000126460	PRRG2	9.85E-05	260.8704147	-2.84939678	0.404462937	-7.044889701	1.86E-12	7.76E-11
ENSG00000170525	PFKFB3	2.10E-05	18881.03591	-2.334584838	0.332354154	-7.024388919	2.15E-12	8.94E-11
ENSG00000036828	CASR	2.89E-19	3513.026954	-5.386383762	0.767172446	-7.021086059	2.20E-12	9.14E-11
ENSG00000269313	MAGIX	0.000267919	376.9947944	-2.627057958	0.374255441	-7.019424896	2.23E-12	9.22E-11
ENSG00000154930	ACSS1	5.01E-08	5677.617223	-2.851315273	0.406263915	-7.018381823	2.24E-12	9.27E-11
ENSG00000019186	CYP24A1	9.76E-16	610.4850636	-6.203751822	0.884608432	-7.012991958	2.33E-12	9.60E-11
ENSG00000125850	OVOL2	5.83E-10	226.1365022	-5.045845848	0.71947785	-7.013205272	2.33E-12	9.60E-11
ENSG00000204956	PCDHGA1	1.85E-07	369.7505601	3.88690474	0.554271997	7.012630555	2.34E-12	9.61E-11
ENSG00000105255	FSD1	1.85E-14	324.8732916	6.214286379	0.886564912	7.009398068	2.39E-12	9.80E-11
ENSG00000166592	RRAD	3.21E-13	1463.009603	-4.546867681	0.648938376	-7.006624744	2.44E-12	9.94E-11
ENSG00000074410	CA12	5.41E-13	12688.62242	-4.028309788	0.575247489	-7.002742067	2.51E-12	1.02E-10
ENSG00000140534	TICRR	4.00E-17	942.6166707	5.908249958	0.84414816	6.999067507	2.58E-12	1.04E-10
ENSG00000171357	LURAP1	3.68E-07	1183.273568	-3.208512029	0.45858098	-6.996609479	2.62E-12	1.06E-10
ENSG00000145824	CXCL14	2.31E-20	7881.076482	-5.618035036	0.803693531	-6.990270321	2.74E-12	1.11E-10
ENSG00000196189	SEMA4A	0.003077733	1355.976853	-1.821611421	0.260821929	-6.984119109	2.87E-12	1.15E-10
ENSG00000148218	ALAD	1.01E-05	7930.352528	-2.356430611	0.33741878	-6.98369727	2.88E-12	1.15E-10
ENSG00000204323	SMIM5	3.64E-09	884.4893968	-3.806085274	0.545483284	-6.977455376	3.01E-12	1.21E-10
ENSG00000161653	NAGS	5.03E-06	367.3881513	-3.264973388	0.467998542	-6.976460601	3.03E-12	1.21E-10
ENSG00000007001	UPP2	2.45E-12	462.0322149	-5.421040479	0.77738314	-6.973447455	3.09E-12	1.24E-10
ENSG00000130517	PGPEP1	9.64E-08	19867.77752	-2.975196837	0.426771939	-6.971397518	3.14E-12	1.25E-10
ENSG00000130226	DPP6	0.000244675	3006.134364	2.077537116	0.298075175	6.969842823	3.17E-12	1.26E-10
ENSG00000132849	PATJ	0.002274814	16597.7279	-1.716809363	0.246343126	-6.969179105	3.19E-12	1.27E-10
ENSG00000225930	LINC02249	5.25E-10	441.1860509	4.590729481	0.658972059	6.966500962	3.25E-12	1.29E-10
ENSG00000023839	ABCC2	4.70E-13	1543.012792	-4.561972325	0.654888526	-6.966028784	3.26E-12	1.29E-10
ENSG00000149571	KIRREL3	7.72E-16	1009.888111	5.485088025	0.788052537	6.960307551	3.40E-12	1.34E-10
ENSG00000228630	HOTAIR	4.69E-17	851.2920158	5.918741031	0.851100757	6.954218968	3.55E-12	1.40E-10
ENSG00000115526	CHST10	0.004199234	879.3463237	1.952932245	0.280932259	6.951612652	3.61E-12	1.42E-10
ENSG00000157064	NMNAT2	8.39E-13	599.9758482	5.128498695	0.737945053	6.949702654	3.66E-12	1.44E-10
ENSG00000153904	DDAH1	1.27E-08	7741.544211	-2.986470507	0.429899843	-6.946898352	3.73E-12	1.46E-10
ENSG00000165495	PKNOX2	0.007485032	949.9281212	1.823954823	0.262783391	6.94090604	3.90E-12	1.53E-10
ENSG00000079557	AFM	1.56E-30	590.175105	-10.99942524	1.585952285	-6.935533521	4.05E-12	1.58E-10
ENSG00000184357	H1-5	1.61E-18	13005.05173	5.22834434	0.754844848	6.926382754	4.32E-12	1.68E-10
ENSG00000278637	H4C1	1.74E-12	1628.939791	4.443606826	0.642033107	6.921149051	4.48E-12	1.74E-10
ENSG00000176641	RNF152	3.88E-09	14885.82579	-3.302565107	0.477735668	-6.912954863	4.75E-12	1.84E-10
ENSG00000134690	CDCA8	1.08E-09	375.2119745	4.711390808	0.681690408	6.911335052	4.80E-12	1.86E-10
ENSG00000101098	RIMS4	7.21E-12	420.9052622	5.463332428	0.790587343	6.910472927	4.83E-12	1.87E-10
ENSG00000184731	FAM110C	3.35E-09	2394.700728	-3.351873387	0.485491268	-6.904085839	5.05E-12	1.95E-10
ENSG00000142675	CNKSR1	9.68E-05	458.237936	-2.69778425	0.390822942	-6.902829802	5.10E-12	1.96E-10
ENSG00000167107	ACSF2	5.33E-08	8651.509224	-2.986069397	0.432882578	-6.898104819	5.27E-12	2.03E-10
ENSG00000182175	RGMA	3.71E-07	1124.663999	3.258474752	0.472471709	6.896655801	5.32E-12	2.04E-10
ENSG00000060971	ACAA1	5.14E-06	10255.20971	-2.453438587	0.355888613	-6.893838408	5.43E-12	2.08E-10
ENSG00000162493	PDPN	8.34E-05	623.4055222	2.666005332	0.386728711	6.893735209	5.43E-12	2.08E-10
ENSG00000213190	MLLT11	7.28E-09	717.0166083	3.946793225	0.572651644	6.892136375	5.50E-12	2.10E-10
ENSG00000157851	DPYSL5	1.35E-16	1099.654179	5.75551395	0.836602417	6.879628644	6.00E-12	2.28E-10
ENSG00000159164	SV2A	3.45E-05	940.9994031	2.68937166	0.391148801	6.875571779	6.17E-12	2.35E-10
ENSG00000101057	MYBL2	4.75E-19	1900.959151	5.747522671	0.836012699	6.874922686	6.20E-12	2.35E-10
ENSG00000186642	PDE2A	3.96E-05	1791.968794	-2.439466876	0.355014145	-6.871463888	6.35E-12	2.41E-10
ENSG00000117650	NEK2	3.30E-10	358.8017872	4.996224132	0.727165187	6.870824153	6.38E-12	2.41E-10
ENSG00000145604	SKP2	7.56E-05	1351.369332	2.470944953	0.360118206	6.861483007	6.81E-12	2.57E-10
ENSG00000143412	ANXA9	1.25E-08	560.0074226	-3.911633336	0.570142141	-6.860803747	6.85E-12	2.58E-10
ENSG00000104892	KLC3	4.39E-13	988.8857108	-4.717532828	0.687705904	-6.859811446	6.90E-12	2.60E-10
ENSG00000055118	KCNH2	4.81E-08	936.652707	3.609197016	0.526442162	6.855828192	7.09E-12	2.66E-10
ENSG00000181218	H2AW	2.90E-10	882.1787042	4.206639345	0.614271458	6.848176466	7.48E-12	2.81E-10
ENSG00000146005	PSD2	3.37E-08	456.8927034	4.037076508	0.589542652	6.847810747	7.50E-12	2.81E-10
ENSG00000166126	AMN	9.71E-25	19630.66526	-6.54813383	0.956304726	-6.847329785	7.52E-12	2.81E-10
ENSG00000121152	NCAPH	5.46E-12	487.054817	5.174602523	0.756609913	6.839194719	7.96E-12	2.97E-10
ENSG00000275126	H4C13	2.16E-21	1465.49618	6.681300021	0.977865417	6.832535339	8.34E-12	3.11E-10
ENSG00000244067	GSTA2	8.53E-25	800.875902	-8.39495927	1.228795122	-6.831862462	8.38E-12	3.12E-10
ENSG00000167535	CACNB3	5.28E-05	1738.359946	2.446684905	0.358228999	6.829946519	8.49E-12	3.15E-10
ENSG00000099834	CDHR5	1.75E-18	5869.827843	-4.909042321	0.718887538	-6.828665207	8.57E-12	3.18E-10
ENSG00000215644	GCGR	1.69E-16	1154.405174	-5.77253139	0.845558514	-6.826885777	8.68E-12	3.21E-10
ENSG00000069188	SDK2	2.00E-09	3600.507649	3.407691966	0.499183206	6.826535678	8.70E-12	3.21E-10
ENSG00000175592	FOSL1	6.96E-09	795.0046427	-3.848313178	0.563897808	-6.824486852	8.82E-12	3.25E-10
ENSG00000150656	CNDP1	9.77E-07	132.2677274	-3.812618252	0.558838237	-6.822400474	8.95E-12	3.29E-10
ENSG00000006210	CX3CL1	2.72E-08	5675.557845	-2.955800781	0.433570414	-6.817348896	9.27E-12	3.40E-10
ENSG00000196338	NLGN3	0.001060752	318.6285653	2.500113456	0.366752361	6.816898058	9.30E-12	3.40E-10
ENSG00000080986	NDC80	2.00E-09	413.7916886	4.537539919	0.66567098	6.816490506	9.33E-12	3.40E-10
ENSG00000154319	FAM167A	0.000136864	851.2059147	-2.434101236	0.357437073	-6.809873452	9.77E-12	3.56E-10
ENSG00000261634	PAQR5-DT	1.30E-15	775.3684949	-5.673247552	0.834774325	-6.796145236	1.07E-11	3.90E-10
ENSG00000236155	ZPLD2P	6.28E-09	365.8581499	-4.24204453	0.624229956	-6.795643956	1.08E-11	3.90E-10
ENSG00000101542	CDH20	1.23E-11	429.3203544	5.159287724	0.759648795	6.791674992	1.11E-11	4.00E-10
ENSG00000125731	SH2D3A	1.96E-10	1517.209286	-4.08078598	0.601327609	-6.786294061	1.15E-11	4.14E-10
ENSG00000124588	NQO2	4.66E-06	4429.995139	-2.436569727	0.359149976	-6.784268108	1.17E-11	4.20E-10
ENSG00000130545	CRB3	3.16E-12	1412.701675	-4.451077565	0.656282854	-6.782254847	1.18E-11	4.25E-10
ENSG00000107831	FGF8	1.10E-15	282.8039435	6.813208701	1.005210312	6.77789376	1.22E-11	4.37E-10
ENSG00000267470	ZNF571-AS1	0.000496569	288.6152736	2.643070275	0.390011835	6.776897617	1.23E-11	4.40E-10
ENSG00000139880	CDH24	3.54E-11	2866.043832	3.751988869	0.553909039	6.773655254	1.26E-11	4.49E-10
ENSG00000158050	DUSP2	1.47E-09	1855.323031	-3.497789197	0.516522855	-6.771799468	1.27E-11	4.53E-10
ENSG00000230267	HERC2P4	1.70E-07	629.558918	3.570456257	0.527361057	6.770420781	1.28E-11	4.57E-10
ENSG00000072832	CRMP1	8.21E-10	896.1680338	4.183162459	0.61792	6.769747632	1.29E-11	4.58E-10
ENSG00000119125	GDA	1.51E-13	969.3516374	-5.104083002	0.755611252	-6.754906028	1.43E-11	5.06E-10
ENSG00000248383	PCDHAC1	5.46E-05	248.294581	3.06904306	0.454460769	6.753152902	1.45E-11	5.12E-10
ENSG00000152284	TCF7L1	0.002007709	2246.319719	1.846440822	0.273970185	6.739568464	1.59E-11	5.61E-10
ENSG00000240771	ARHGEF25	0.004559739	2112.06084	1.732333507	0.257329938	6.731954773	1.67E-11	5.90E-10
ENSG00000074527	NTN4	1.06E-09	11434.76162	-3.315824625	0.493462486	-6.71950699	1.82E-11	6.42E-10
ENSG00000164649	CDCA7L	1.11E-08	3260.609986	3.196805649	0.476276494	6.712079403	1.92E-11	6.73E-10
ENSG00000138160	KIF11	2.49E-09	961.5280137	3.890088554	0.580000079	6.707048311	1.99E-11	6.94E-10
ENSG00000143921	ABCG8	2.20E-07	141.9850453	-4.000074646	0.596388166	-6.707166362	1.98E-11	6.94E-10
ENSG00000139915	MDGA2	9.40E-07	389.804293	3.581568124	0.53425022	6.703915114	2.03E-11	7.07E-10
ENSG00000148339	SLC25A25	0.000204938	7514.524064	-1.968789226	0.293677727	-6.703910589	2.03E-11	7.07E-10
ENSG00000197977	ELOVL2	6.79E-11	242.2517357	5.351116036	0.798258391	6.703488618	2.04E-11	7.08E-10
ENSG00000111186	WNT5B	3.37E-06	1172.545088	2.893802333	0.431778276	6.702056339	2.06E-11	7.14E-10
ENSG00000160862	AZGP1	2.37E-32	5082.142361	-7.389086918	1.103652443	-6.695121243	2.15E-11	7.48E-10
ENSG00000196890	H2BU1	8.51E-08	299.4556014	4.050990772	0.605693571	6.688185197	2.26E-11	7.83E-10
ENSG00000173406	DAB1	1.23E-08	398.5841512	4.153820936	0.621123846	6.6875889	2.27E-11	7.85E-10
ENSG00000172366	MCRIP2	1.67E-07	2372.742463	-2.938784364	0.439540625	-6.686035816	2.29E-11	7.92E-10
ENSG00000116882	HAO2	1.78E-25	3541.695799	-6.414791808	0.959687824	-6.684248405	2.32E-11	8.00E-10
ENSG00000143476	DTL	2.95E-11	799.239762	4.997496957	0.747693861	6.683881225	2.33E-11	8.01E-10
ENSG00000165905	LARGE2	1.07E-07	1501.784855	-3.170365231	0.47489601	-6.675914658	2.46E-11	8.44E-10
ENSG00000278828	H3C10	2.40E-11	992.4659999	4.478545023	0.672399256	6.660544285	2.73E-11	9.34E-10
ENSG00000273079	GRIN2B	5.04E-10	1445.548429	4.170126838	0.626236959	6.659023838	2.76E-11	9.42E-10
ENSG00000141401	IMPA2	4.60E-08	7330.253164	-2.942495412	0.442147164	-6.655013646	2.83E-11	9.66E-10
ENSG00000167799	NUDT8	0.000641683	256.7560521	-2.502554791	0.376076921	-6.65436949	2.85E-11	9.68E-10
ENSG00000007968	E2F2	2.25E-10	638.6296283	4.42098728	0.664737805	6.650723404	2.92E-11	9.90E-10
ENSG00000188488	SERPINA5	1.01E-17	3065.536789	-5.01323848	0.754229406	-6.646835085	2.99E-11	1.01E-09
ENSG00000135525	MAP7	2.90E-08	7923.210997	-2.96235782	0.445879656	-6.643850598	3.06E-11	1.03E-09
ENSG00000115762	PLEKHB2	0.012377766	8147.990253	-1.403352063	0.211295278	-6.641663159	3.10E-11	1.05E-09
ENSG00000162951	LRRTM1	9.60E-15	1500.434067	4.996399085	0.752402764	6.640591084	3.12E-11	1.05E-09
ENSG00000204065	TCEAL5	2.80E-13	529.1304621	5.458007213	0.82217122	6.638528666	3.17E-11	1.07E-09
ENSG00000164109	MAD2L1	1.29E-06	594.5516279	3.310958763	0.499389621	6.630011169	3.36E-11	1.13E-09
ENSG00000167191	GPRC5B	0.00051446	6176.962847	-1.810719273	0.273334807	-6.62454699	3.48E-11	1.17E-09
ENSG00000112499	SLC22A2	2.36E-27	3161.205262	-7.064560784	1.066909219	-6.62152005	3.56E-11	1.19E-09
ENSG00000164855	TMEM184A	1.53E-05	1179.866741	-2.63090979	0.397432928	-6.619757957	3.60E-11	1.20E-09
ENSG00000132535	DLG4	0.008757765	2342.874229	1.599271836	0.241731565	6.615899894	3.69E-11	1.23E-09
ENSG00000075234	TTC38	0.000245767	3788.771079	-1.96898153	0.297630111	-6.615532029	3.70E-11	1.23E-09
ENSG00000173705	SUSD5	1.83E-13	1977.68798	4.762026532	0.721354553	6.601506165	4.07E-11	1.34E-09
ENSG00000002746	HECW1	5.39E-14	2220.218395	-4.472997725	0.677632297	-6.600921684	4.09E-11	1.35E-09
ENSG00000180815	MAP3K15	1.19E-05	370.1293425	-3.136162471	0.475168786	-6.600102031	4.11E-11	1.35E-09
ENSG00000092853	CLSPN	1.03E-09	960.8412948	4.026417011	0.610115349	6.599435689	4.13E-11	1.36E-09
ENSG00000167037	SGSM1	1.83E-05	748.1222119	-2.807584445	0.425489031	-6.598488419	4.15E-11	1.36E-09
ENSG00000144218	AFF3	1.15E-08	3261.785686	3.205854266	0.486530231	6.589219046	4.42E-11	1.45E-09
ENSG00000165891	E2F7	9.26E-12	383.6522654	5.484945544	0.832571965	6.587953685	4.46E-11	1.46E-09
ENSG00000162777	DENND2D	1.73E-05	1523.758906	-2.513127834	0.381682253	-6.584345526	4.57E-11	1.49E-09
ENSG00000078804	TP53INP2	0.000188168	4331.794943	-1.969844099	0.29940616	-6.57917024	4.73E-11	1.53E-09
ENSG00000165685	TMEM52B	1.10E-19	3405.578244	-5.635026232	0.856685427	-6.577707588	4.78E-11	1.55E-09
ENSG00000184937	WT1	2.06E-09	7040.710298	3.195576389	0.486286791	6.571382256	4.99E-11	1.61E-09
ENSG00000122971	ACADS	1.78E-06	2248.299945	-2.689485715	0.409455188	-6.568449476	5.08E-11	1.64E-09
ENSG00000135503	ACVR1B	0.007428646	7972.762861	-1.465267651	0.22307475	-6.568505191	5.08E-11	1.64E-09
ENSG00000055163	CYFIP2	6.61E-08	18105.37647	-2.963852733	0.451613466	-6.562808592	5.28E-11	1.70E-09
ENSG00000205795	CYS1	2.04E-16	24708.51033	-5.002601667	0.7630117	-6.556389195	5.51E-11	1.77E-09
ENSG00000126803	HSPA2	6.93E-10	5160.240731	-3.229203619	0.492761973	-6.553272765	5.63E-11	1.80E-09
ENSG00000137731	FXYD2	9.11E-15	17340.38995	-4.675493361	0.713446617	-6.553389211	5.62E-11	1.80E-09
ENSG00000142273	CBLC	4.90E-06	234.4855622	-3.462907054	0.529028416	-6.545786478	5.92E-11	1.89E-09
ENSG00000165238	WNK2	4.55E-11	5352.316111	3.550896675	0.542516151	6.545236801	5.94E-11	1.90E-09
ENSG00000143627	PKLR	1.03E-26	3393.29262	-6.571764348	1.004332678	-6.543413843	6.01E-11	1.91E-09
ENSG00000136492	BRIP1	5.75E-08	487.3989445	3.905686661	0.597012689	6.542049665	6.07E-11	1.93E-09
ENSG00000259291	ZNF710-AS1	0.000530005	1764.02891	-2.043671687	0.312383081	-6.542197093	6.06E-11	1.93E-09
ENSG00000155760	FZD7	2.38E-10	10422.55333	3.544617617	0.542411554	6.534922774	6.36E-11	2.02E-09
ENSG00000144354	CDCA7	4.20E-10	363.387263	4.869347966	0.745594575	6.530825371	6.54E-11	2.07E-09
ENSG00000187446	CHP1	0.001731805	3882.52926	-1.692983836	0.25923726	-6.530634663	6.55E-11	2.07E-09
ENSG00000271474	UNC5C-AS1	3.12E-05	386.8842686	3.09227435	0.473514787	6.530470502	6.56E-11	2.07E-09
ENSG00000131711	MAP1B	7.67E-06	9652.327926	2.477989759	0.379497483	6.529660587	6.59E-11	2.07E-09
ENSG00000182379	NXPH4	2.83E-07	264.6584747	3.881430587	0.594591401	6.527895593	6.67E-11	2.10E-09
ENSG00000177106	EPS8L2	5.63E-11	12296.21394	-3.648972293	0.559052969	-6.52706004	6.71E-11	2.10E-09
ENSG00000255545	B3GAT1-DT	2.46E-09	820.0713583	-3.813971045	0.584441337	-6.525840671	6.76E-11	2.12E-09
ENSG00000176208	ATAD5	1.13E-05	553.8058739	3.030408902	0.46492528	6.51805576	7.12E-11	2.22E-09
ENSG00000142230	SAE1	0.001110368	5496.987697	1.803248925	0.277499394	6.498208521	8.13E-11	2.52E-09
ENSG00000158427	TMSB15B	1.59E-05	240.8898672	3.295275285	0.507272488	6.496065459	8.24E-11	2.56E-09
ENSG00000101412	E2F1	5.95E-09	792.9089445	3.852148347	0.593595041	6.489522449	8.61E-11	2.66E-09
ENSG00000142910	TINAGL1	8.09E-08	9065.693954	-3.002954685	0.462952193	-6.486533011	8.78E-11	2.71E-09
ENSG00000114786	ABHD14A-ACY1	2.87E-14	9137.60148	-4.379867136	0.675254598	-6.486245552	8.80E-11	2.71E-09
ENSG00000079841	RIMS1	3.48E-08	259.003697	4.173971975	0.643743226	6.483908188	8.94E-11	2.75E-09
ENSG00000159640	ACE	2.58E-05	2205.114965	-2.355694253	0.363355605	-6.48316475	8.98E-11	2.76E-09
ENSG00000159166	LAD1	2.18E-09	3386.361069	-3.240917679	0.499920443	-6.482866869	9.00E-11	2.77E-09
ENSG00000124145	SDC4	1.38E-05	19103.21627	-2.419433533	0.373525175	-6.4772971	9.34E-11	2.86E-09
ENSG00000173894	CBX2	1.38E-16	4406.972718	4.649276508	0.717784154	6.47726267	9.34E-11	2.86E-09
ENSG00000162174	ASRGL1	0.002065141	2139.927442	-1.778687522	0.274761179	-6.473576539	9.57E-11	2.93E-09
ENSG00000176532	PRR15	3.90E-09	763.3225666	-3.980253482	0.615163746	-6.470234161	9.79E-11	2.99E-09
ENSG00000156103	MMP16	1.03E-19	2331.902571	5.835160853	0.902360926	6.46654868	1.00E-10	3.06E-09
ENSG00000135678	CPM	1.14E-09	5824.581679	-3.231638908	0.500058053	-6.46252748	1.03E-10	3.13E-09
ENSG00000186185	KIF18B	6.77E-17	2024.881425	5.161607271	0.799089295	6.459362309	1.05E-10	3.19E-09
ENSG00000067798	NAV3	4.86E-11	2299.380885	3.913783298	0.60601265	6.458253468	1.06E-10	3.21E-09
ENSG00000141540	TTYH2	0.000531653	870.9025117	2.287005914	0.354151865	6.457698355	1.06E-10	3.22E-09
ENSG00000148057	IDNK	8.66E-05	719.9246704	-2.581159306	0.399792135	-6.45625334	1.07E-10	3.25E-09
ENSG00000075643	MOCOS	0.001608674	190.8016612	-2.413079019	0.373944656	-6.453037845	1.10E-10	3.31E-09
ENSG00000132437	DDC	2.58E-19	12337.96926	-5.430650122	0.841615503	-6.45264982	1.10E-10	3.31E-09
ENSG00000262096	PCDHB19P	0.000114975	305.1843397	2.919661791	0.452808124	6.447900638	1.13E-10	3.40E-09
ENSG00000111432	FZD10	2.25E-14	1450.802466	4.879634901	0.757056261	6.445538	1.15E-10	3.44E-09
ENSG00000203995	ZYG11A	5.72E-14	990.0839717	-5.096409796	0.790686201	-6.44555298	1.15E-10	3.44E-09
ENSG00000249201	TERLR1	1.08E-12	346.6236096	-5.494800149	0.85250828	-6.44545077	1.15E-10	3.44E-09
ENSG00000084710	EFR3B	8.08E-11	3459.578865	3.679349039	0.57097341	6.44399367	1.16E-10	3.47E-09
ENSG00000169679	BUB1	1.92E-11	508.8431816	5.258184541	0.816441402	6.440369787	1.19E-10	3.55E-09
ENSG00000162460	TMEM82	9.86E-20	709.326585	-7.125954799	1.10732588	-6.435282448	1.23E-10	3.66E-09
ENSG00000163817	SLC6A20	3.37E-12	423.4047935	-5.397560293	0.838775939	-6.435044261	1.23E-10	3.66E-09
ENSG00000131844	MCCC2	0.001642263	3818.899564	-1.727219858	0.26873054	-6.427329985	1.30E-10	3.84E-09
ENSG00000133315	MACROD1	6.05E-06	1299.287919	-2.824798356	0.440071073	-6.418959409	1.37E-10	4.04E-09
ENSG00000197410	DCHS2	1.23E-08	2170.176734	3.461064222	0.53925853	6.418190966	1.38E-10	4.05E-09
ENSG00000165304	MELK	7.09E-10	211.5517864	5.412668973	0.843566908	6.416407423	1.40E-10	4.09E-09
ENSG00000172367	PDZD3	1.73E-18	2474.21987	-5.34915673	0.833719663	-6.416013639	1.40E-10	4.10E-09
ENSG00000119431	HDHD3	0.000326954	2375.399975	-2.02250218	0.315294064	-6.414653531	1.41E-10	4.13E-09
ENSG00000025039	RRAGD	0.000458049	3485.4065	-1.895843141	0.295663113	-6.412173371	1.43E-10	4.19E-09
ENSG00000197299	BLM	6.98E-07	379.9445224	3.817130257	0.595418249	6.410838536	1.45E-10	4.23E-09
ENSG00000163874	ZC3H12A	2.59E-07	1555.491132	-3.065337241	0.478382895	-6.407706617	1.48E-10	4.31E-09
ENSG00000142235	LMTK3	4.06E-11	1677.390648	-4.146625961	0.647876876	-6.400330237	1.55E-10	4.51E-09
ENSG00000123689	G0S2	1.74E-11	5940.994349	-3.65769391	0.572165754	-6.392717293	1.63E-10	4.73E-09
ENSG00000185339	TCN2	1.15E-05	2689.0515	-2.462806313	0.385432245	-6.389725676	1.66E-10	4.81E-09
ENSG00000141469	SLC14A1	2.26E-08	750.4501459	-3.858934987	0.604051117	-6.388424549	1.68E-10	4.84E-09
ENSG00000166311	SMPD1	0.005652318	2391.749243	-1.584127817	0.248199338	-6.382482048	1.74E-10	5.02E-09
ENSG00000160886	LY6K	1.93E-07	196.207313	-3.931672332	0.616175896	-6.380762958	1.76E-10	5.07E-09
ENSG00000116005	PCYOX1	2.88E-05	11813.50791	-2.265902051	0.355274081	-6.377898572	1.80E-10	5.16E-09
ENSG00000172828	CES3	4.07E-11	1458.751692	-4.028830093	0.632103464	-6.373687732	1.85E-10	5.29E-09
ENSG00000156802	ATAD2	3.74E-07	1758.060342	3.073302455	0.482319789	6.371918648	1.87E-10	5.34E-09
ENSG00000102230	PCYT1B	7.31E-07	397.3621037	3.640184	0.572192962	6.361811913	1.99E-10	5.68E-09
ENSG00000111725	PRKAB1	0.010605907	4310.52615	-1.39678766	0.21994361	-6.350662596	2.14E-10	6.10E-09
ENSG00000196277	GRM7	6.00E-09	220.4805986	4.545698473	0.715939591	6.34927657	2.16E-10	6.14E-09
ENSG00000118733	OLFM3	2.44E-12	418.0681541	5.355659431	0.843661779	6.348111962	2.18E-10	6.18E-09
ENSG00000090975	PITPNM2	0.005308381	1709.449774	-1.698474314	0.267602022	-6.347015983	2.20E-10	6.22E-09
ENSG00000167552	TUBA1A	9.90E-07	7128.200582	2.643593234	0.416694346	6.34420231	2.24E-10	6.32E-09
ENSG00000101342	TLDC2	0.001320802	260.4097795	-2.399651954	0.378261679	-6.343893891	2.24E-10	6.32E-09
ENSG00000145832	SLC25A48	1.89E-09	609.6392613	-4.099397712	0.646340448	-6.342474346	2.26E-10	6.37E-09
ENSG00000173826	KCNH6	1.84E-12	451.4385666	-5.243165556	0.82765079	-6.334997342	2.37E-10	6.67E-09
ENSG00000126522	ASL	0.000186625	2902.673997	-2.051975712	0.324191215	-6.329522869	2.46E-10	6.89E-09
ENSG00000183535	COL18A1-AS1	1.77E-11	251.8899484	-5.442843798	0.860457407	-6.325523793	2.52E-10	7.06E-09
ENSG00000118971	CCND2	3.46E-08	18004.03359	3.160311671	0.499728939	6.324051751	2.55E-10	7.12E-09
ENSG00000112769	LAMA4	3.65E-09	14622.51879	3.512245998	0.555440238	6.323355344	2.56E-10	7.14E-09
ENSG00000166508	MCM7	1.05E-06	12826.73026	2.711743394	0.428984396	6.321310101	2.59E-10	7.23E-09
ENSG00000143217	NECTIN4	1.72E-08	439.1421437	-3.97180901	0.628981825	-6.314664198	2.71E-10	7.54E-09
ENSG00000105048	TNNT1	4.99E-24	1237.025541	7.465231105	1.182574924	6.312691866	2.74E-10	7.63E-09
ENSG00000170190	SLC16A5	4.15E-06	950.8540617	-3.035691304	0.480947324	-6.311899777	2.76E-10	7.66E-09
ENSG00000111247	RAD51AP1	1.36E-06	251.7951189	3.85930249	0.611580421	6.31037613	2.78E-10	7.72E-09
ENSG00000254221	PCDHGB1	2.10E-05	869.0421079	2.726259744	0.43230994	6.306261997	2.86E-10	7.91E-09
ENSG00000175322	ZNF519	8.89E-05	528.5760061	2.743640666	0.435367568	6.301894924	2.94E-10	8.13E-09
ENSG00000183856	IQGAP3	1.51E-13	2390.120462	4.35349287	0.690863208	6.301526581	2.95E-10	8.14E-09
ENSG00000168016	TRANK1	0.000897663	5546.301871	1.853801003	0.294293674	6.299153414	2.99E-10	8.25E-09
ENSG00000047617	ANO2	4.26E-05	512.6669986	2.90473758	0.461518329	6.293872638	3.10E-10	8.52E-09
ENSG00000232977	LINC00327	3.54E-07	134.5956772	4.121649815	0.654950309	6.293072554	3.11E-10	8.54E-09
ENSG00000159228	CBR1	0.001122165	3399.960176	-1.772608251	0.281729042	-6.291890378	3.14E-10	8.59E-09
ENSG00000130821	SLC6A8	0.000174315	5316.038101	-1.990396891	0.316452801	-6.289711724	3.18E-10	8.70E-09
ENSG00000164237	CMBL	4.32E-09	6040.593639	-3.179001898	0.505657788	-6.286864303	3.24E-10	8.84E-09
ENSG00000114737	CISH	6.37E-06	2881.708713	-2.465452278	0.392212609	-6.286009742	3.26E-10	8.87E-09
ENSG00000162104	ADCY9	0.001262849	4744.708486	-1.698168572	0.270253408	-6.283615742	3.31E-10	9.00E-09
ENSG00000101115	SALL4	3.78E-10	441.2174567	4.613093856	0.735162429	6.274931461	3.50E-10	9.50E-09
ENSG00000100412	ACO2	0.000267919	13099.67438	-2.013766799	0.320977388	-6.273858773	3.52E-10	9.56E-09
ENSG00000075218	GTSE1	5.74E-13	1239.327097	4.636590574	0.739616014	6.268915875	3.64E-10	9.84E-09
ENSG00000115221	ITGB6	1.05E-16	3744.059065	-4.758969252	0.759516383	-6.265788806	3.71E-10	1.00E-08
ENSG00000116157	GPX7	0.004769648	411.8148248	2.121040117	0.338606655	6.264023723	3.75E-10	1.01E-08
ENSG00000167106	FAM102A	0.000251906	7817.378557	-1.976078297	0.315519238	-6.262940759	3.78E-10	1.02E-08
ENSG00000147027	TMEM47	5.57E-06	1395.76097	-2.738310221	0.437259061	-6.26244363	3.79E-10	1.02E-08
ENSG00000183454	GRIN2A	2.53E-10	2276.191573	3.672761355	0.586814551	6.258810982	3.88E-10	1.04E-08
ENSG00000148090	AUH	0.029933825	1377.772099	-1.402772771	0.224304499	-6.25387711	4.00E-10	1.07E-08
ENSG00000064309	CDON	2.37E-07	2034.462581	3.145138641	0.503162304	6.25074378	4.09E-10	1.09E-08
ENSG00000121236	TRIM6	1.84E-06	1203.356334	-2.918420225	0.466909951	-6.250499088	4.09E-10	1.09E-08
ENSG00000072778	ACADVL	0.017907444	24774.87018	-1.395677271	0.22339914	-6.247460359	4.17E-10	1.11E-08
ENSG00000157542	KCNJ6	4.16E-07	344.5884707	3.765026685	0.602773531	6.246171226	4.21E-10	1.12E-08
ENSG00000163631	ALB	2.62E-10	182.7297599	-4.975900882	0.796726574	-6.24543105	4.23E-10	1.12E-08
ENSG00000109805	NCAPG	1.12E-11	488.0031594	5.312707741	0.85118827	6.241518976	4.33E-10	1.15E-08
ENSG00000132837	DMGDH	1.66E-16	2874.560987	-4.820869112	0.772530315	-6.240362374	4.37E-10	1.16E-08
ENSG00000177932	ZNF354C	0.027510742	1447.885001	1.471219219	0.236056444	6.232489122	4.59E-10	1.22E-08
ENSG00000021488	SLC7A9	9.62E-13	1029.435632	-4.67761914	0.75064368	-6.231477414	4.62E-10	1.22E-08
ENSG00000169684	CHRNA5	1.50E-07	178.4118252	4.031866049	0.648119981	6.220863675	4.94E-10	1.30E-08
ENSG00000105011	ASF1B	1.50E-06	345.6504913	3.537205258	0.568646764	6.220391081	4.96E-10	1.31E-08
ENSG00000168772	CXXC4	6.44E-06	381.5178694	3.369384739	0.542208052	6.214191631	5.16E-10	1.36E-08
ENSG00000182749	PAQR7	9.29E-05	3623.508015	-2.096551921	0.337610457	-6.209973301	5.30E-10	1.39E-08
ENSG00000170482	SLC23A1	1.55E-15	917.6384763	-5.598813948	0.901841534	-6.208201479	5.36E-10	1.40E-08
ENSG00000189120	SP6	3.40E-06	822.6767705	3.040695126	0.489795757	6.208087934	5.36E-10	1.40E-08
ENSG00000003436	TFPI	6.11E-10	3655.604511	-3.379306187	0.544664735	-6.204378523	5.49E-10	1.43E-08
ENSG00000185559	DLK1	2.71E-13	368.6864217	5.894114798	0.95025083	6.202693663	5.55E-10	1.45E-08
ENSG00000118596	SLC16A7	7.17E-12	1783.980456	-4.301428636	0.693567489	-6.20188908	5.58E-10	1.45E-08
ENSG00000242265	PEG10	1.18E-08	15251.79256	3.327547579	0.536538764	6.2018773	5.58E-10	1.45E-08
ENSG00000002726	AOC1	1.47E-22	18002.26226	-6.133260724	0.990093815	-6.194625836	5.84E-10	1.51E-08
ENSG00000276043	UHRF1	9.76E-19	5942.730579	5.017540411	0.812334577	6.176691911	6.55E-10	1.69E-08
ENSG00000111885	MAN1A1	5.45E-09	10998.64743	-3.138657435	0.508647996	-6.170588426	6.80E-10	1.75E-08
ENSG00000144648	ACKR2	0.00154509	231.9376657	-2.36057307	0.382578887	-6.170160318	6.82E-10	1.76E-08
ENSG00000106927	AMBP	1.19E-08	202.4130375	-4.425861264	0.717561404	-6.167919904	6.92E-10	1.78E-08
ENSG00000187595	ZNF385C	1.42E-07	653.8485115	3.624078365	0.587605778	6.167533577	6.94E-10	1.78E-08
ENSG00000068078	FGFR3	3.02E-09	7032.547399	-3.282211605	0.532383516	-6.165126284	7.04E-10	1.81E-08
ENSG00000185442	FAM174B	0.033968067	831.4614632	1.520759775	0.246961255	6.157888111	7.37E-10	1.89E-08
ENSG00000175287	PHYHD1	0.00202838	1032.031063	-1.921105855	0.312004224	-6.157307203	7.40E-10	1.89E-08
ENSG00000133169	BEX1	8.37E-10	1626.114859	3.811053478	0.619240781	6.154396794	7.54E-10	1.92E-08
ENSG00000009765	IYD	1.22E-19	2517.943894	-5.598192645	0.910014855	-6.151759624	7.66E-10	1.95E-08
ENSG00000166997	CNPY4	0.099179332	1215.356254	1.188914841	0.193312865	6.150210652	7.74E-10	1.97E-08
ENSG00000133466	C1QTNF6	0.094369375	1241.943768	1.20066007	0.195409036	6.144342638	8.03E-10	2.03E-08
ENSG00000253537	PCDHGA7	0.000199489	905.8541336	2.420175555	0.393879106	6.144462897	8.02E-10	2.03E-08
ENSG00000224578	HNRNPA1L3	0.000401292	2802.19534	2.045345927	0.333107116	6.140204836	8.24E-10	2.08E-08
ENSG00000080854	IGSF9B	3.75E-05	1298.55191	2.600742185	0.423599486	6.139625449	8.27E-10	2.09E-08
ENSG00000138180	CEP55	4.55E-09	234.8231252	4.890180631	0.796669363	6.138281269	8.34E-10	2.10E-08
ENSG00000148672	GLUD1	0.000955144	13161.65126	-1.826169243	0.297661201	-6.135059714	8.51E-10	2.14E-08
ENSG00000100344	PNPLA3	6.73E-08	668.8057929	-3.64430158	0.594122697	-6.133920817	8.57E-10	2.16E-08
ENSG00000105289	TJP3	2.29E-08	1362.857789	-3.346929729	0.545672395	-6.133588134	8.59E-10	2.16E-08
ENSG00000180509	KCNE1	6.09E-05	171.1343751	-3.126755287	0.510062158	-6.130145589	8.78E-10	2.20E-08
ENSG00000145386	CCNA2	6.75E-08	552.7699493	3.777405694	0.616495374	6.127224715	8.94E-10	2.24E-08
ENSG00000100889	PCK2	7.24E-10	10330.5702	-3.499422722	0.571162682	-6.126840621	8.96E-10	2.24E-08
ENSG00000185187	SIGIRR	1.04E-06	2369.100102	-2.824850828	0.461278263	-6.123962598	9.13E-10	2.28E-08
ENSG00000160746	ANO10	0.08686084	2638.708836	-1.032487626	0.168719058	-6.11956727	9.38E-10	2.34E-08
ENSG00000134258	VTCN1	1.24E-07	334.4853873	-3.881834013	0.634604952	-6.116929911	9.54E-10	2.38E-08
ENSG00000181035	SLC25A42	1.20E-06	3557.403586	-2.64997168	0.433337611	-6.115258889	9.64E-10	2.40E-08
ENSG00000204613	TRIM10	4.41E-12	269.6697698	-5.455737691	0.892983403	-6.109562249	9.99E-10	2.48E-08
ENSG00000074803	SLC12A1	6.06E-23	52129.44279	-6.802858826	1.113860195	-6.107462013	1.01E-09	2.51E-08
ENSG00000120915	EPHX2	2.27E-06	5563.653081	-2.476244198	0.405820747	-6.101817655	1.05E-09	2.59E-08
ENSG00000111665	CDCA3	1.03E-05	339.8142224	3.208648273	0.526397519	6.09548517	1.09E-09	2.69E-08
ENSG00000104808	DHDH	1.74E-07	428.2079245	-3.874299813	0.635941363	-6.092228056	1.11E-09	2.74E-08
ENSG00000184828	ZBTB7C	7.98E-07	2037.215749	2.885460149	0.47363644	6.092141364	1.11E-09	2.74E-08
ENSG00000196584	XRCC2	2.26E-07	610.2492838	3.527843324	0.579718508	6.085441948	1.16E-09	2.85E-08
ENSG00000144152	FBLN7	2.92E-06	1307.585041	2.889551305	0.475755795	6.073601909	1.25E-09	3.06E-08
ENSG00000231312	MAP4K3-DT	0.007428646	438.0867192	-1.923774626	0.316757113	-6.073343092	1.25E-09	3.07E-08
ENSG00000175311	ANKS4B	1.25E-15	1889.854093	-5.069233539	0.83470628	-6.073074636	1.25E-09	3.07E-08
ENSG00000238164	TNFRSF14-AS1	1.30E-06	568.2676139	-3.268166095	0.53847851	-6.069260021	1.29E-09	3.13E-08
ENSG00000165188	RNF183	4.43E-07	400.2036442	-3.60816344	0.594607961	-6.06813847	1.29E-09	3.15E-08
ENSG00000276410	H2BC3	5.78E-15	969.134768	5.436573722	0.896091644	6.066984059	1.30E-09	3.17E-08
ENSG00000165511	ZNF22-AS1	8.97E-05	281.3832495	2.902070773	0.478426153	6.065869847	1.31E-09	3.18E-08
ENSG00000105357	MYH14	5.47E-08	13520.03913	-2.941794364	0.485033405	-6.065137651	1.32E-09	3.19E-08
ENSG00000139200	PIANP	4.13E-10	827.7533436	4.156603277	0.685340919	6.065015468	1.32E-09	3.19E-08
ENSG00000172731	LRRC20	0.000198677	846.0544729	2.478142049	0.40858552	6.065173445	1.32E-09	3.19E-08
ENSG00000170049	KCNAB3	0.027602503	325.6379696	1.70584827	0.281400379	6.061997067	1.34E-09	3.25E-08
ENSG00000164045	CDC25A	8.49E-08	693.4222157	3.646890357	0.602003112	6.057926088	1.38E-09	3.33E-08
ENSG00000183580	FBXL7	0.051634697	1250.168695	1.364452684	0.225380979	6.053983306	1.41E-09	3.41E-08
ENSG00000215859	PDZK1P1	5.26E-16	1258.042228	-5.427621886	0.897132506	-6.049966811	1.45E-09	3.49E-08
ENSG00000169184	MN1	1.54E-07	2852.390593	2.957421366	0.48922655	6.045095808	1.49E-09	3.58E-08
ENSG00000171848	RRM2	3.14E-07	865.7766251	3.374411255	0.558196784	6.045200096	1.49E-09	3.58E-08
ENSG00000144057	ST6GAL2	3.95E-08	1695.576445	3.490302282	0.577751097	6.041186768	1.53E-09	3.66E-08
ENSG00000127129	EDN2	2.79E-08	332.3024711	-4.00626221	0.663263089	-6.040230912	1.54E-09	3.67E-08
ENSG00000168078	PBK	3.44E-09	164.4677655	5.124718389	0.84886518	6.037140538	1.57E-09	3.74E-08
ENSG00000131746	TNS4	3.86E-11	141.0132911	-5.573725547	0.923476011	-6.035593215	1.58E-09	3.77E-08
ENSG00000156299	TIAM1	9.26E-08	3241.1346	3.017057004	0.500047502	6.033540802	1.60E-09	3.81E-08
ENSG00000129354	AP1M2	2.80E-06	1008.787822	-2.93713425	0.486850595	-6.032927312	1.61E-09	3.82E-08
ENSG00000173153	ESRRA	4.66E-07	7272.758995	-2.699083771	0.447439282	-6.032290597	1.62E-09	3.83E-08
ENSG00000165061	ZMAT4	2.34E-12	505.5692097	5.519009455	0.915568308	6.027960348	1.66E-09	3.93E-08
ENSG00000152413	HOMER1	0.001037971	2250.791215	-1.898020396	0.315021559	-6.025049211	1.69E-09	3.99E-08
ENSG00000132481	TRIM47	6.95E-07	2223.2033	-2.784629223	0.462467005	-6.0212495	1.73E-09	4.09E-08
ENSG00000277075	H2AC8	5.38E-13	3845.718327	4.086887767	0.67937777	6.015633644	1.79E-09	4.23E-08
ENSG00000100170	SLC5A1	7.12E-15	521.3118089	-5.845922321	0.972115795	-6.013606971	1.81E-09	4.27E-08
ENSG00000117122	MFAP2	7.88E-07	1313.044065	3.096483371	0.51493491	6.013349084	1.82E-09	4.27E-08
ENSG00000214113	LYRM4	0.011930873	1186.765702	1.656751763	0.275643363	6.010490318	1.85E-09	4.34E-08
ENSG00000131183	SLC34A1	1.62E-26	11316.45711	-6.595940592	1.097438123	-6.010307509	1.85E-09	4.34E-08
ENSG00000162738	VANGL2	8.85E-06	3376.297669	2.524457333	0.420197964	6.007780976	1.88E-09	4.40E-08
ENSG00000020256	ZFP64	0.080866575	890.3846842	1.28079492	0.213284363	6.005104653	1.91E-09	4.46E-08
ENSG00000106688	SLC1A1	9.75E-12	2024.479001	-4.048780631	0.674218184	-6.005148968	1.91E-09	4.46E-08
ENSG00000066248	NGEF	3.48E-05	942.7853832	-2.676833523	0.445994808	-6.00193876	1.95E-09	4.54E-08
ENSG00000112561	TFEB	6.05E-05	1856.389468	-2.313654204	0.385594372	-6.000228148	1.97E-09	4.59E-08
ENSG00000187017	ESPN	5.39E-10	3798.364792	-3.436014934	0.572744281	-5.999212993	1.98E-09	4.61E-08
ENSG00000187741	FANCA	1.34E-08	1833.583227	3.378215271	0.563162043	5.998655825	1.99E-09	4.62E-08
ENSG00000104897	SF3A2	0.052239516	3921.711662	1.196228341	0.199629803	5.992233255	2.07E-09	4.79E-08
ENSG00000218336	TENM3	9.98E-06	3551.14135	2.43837913	0.406986828	5.991297416	2.08E-09	4.81E-08
ENSG00000183696	UPP1	8.60E-07	2053.616411	-2.827871817	0.472043943	-5.990696124	2.09E-09	4.83E-08
ENSG00000127824	TUBA4A	5.87E-05	837.996117	-2.578376446	0.430492247	-5.9893679	2.11E-09	4.86E-08
ENSG00000211445	GPX3	1.52E-13	59572.65133	-4.513744085	0.753826606	-5.987774969	2.13E-09	4.90E-08
ENSG00000142449	FBN3	1.13E-14	8137.886109	4.398196184	0.73479203	5.985634038	2.16E-09	4.96E-08
ENSG00000006555	TTC22	1.32E-13	2059.338772	-4.400139735	0.73535078	-5.983728932	2.18E-09	5.01E-08
ENSG00000132793	LPIN3	2.50E-10	2746.914277	-3.517181271	0.587856386	-5.983062109	2.19E-09	5.03E-08
ENSG00000261599	HERC2P8	3.57E-06	349.3795528	3.44132032	0.575537322	5.979317389	2.24E-09	5.13E-08
ENSG00000198732	SMOC1	1.48E-07	539.0801941	3.729819757	0.623930487	5.977941193	2.26E-09	5.17E-08
ENSG00000139722	VPS37B	0.011930873	4995.123237	-1.373710273	0.230014422	-5.972278878	2.34E-09	5.34E-08
ENSG00000143867	OSR1	1.50E-08	991.421984	3.588106839	0.600847656	5.971741424	2.35E-09	5.36E-08
ENSG00000145476	CYP4V2	9.36E-07	4572.071392	-2.5832728	0.432913443	-5.967180839	2.41E-09	5.50E-08
ENSG00000090539	CHRD	7.71E-06	2009.821187	-2.55986314	0.429058313	-5.966235969	2.43E-09	5.53E-08
ENSG00000156453	PCDH1	1.81E-06	5217.049141	-2.554344794	0.428403048	-5.962480436	2.48E-09	5.65E-08
ENSG00000171617	ENC1	8.42E-10	8686.795839	3.594636619	0.603911596	5.952256324	2.64E-09	5.97E-08
ENSG00000122121	XPNPEP2	2.01E-23	7780.893667	-5.832039286	0.98000565	-5.951026186	2.66E-09	6.01E-08
ENSG00000128298	BAIAP2L2	9.98E-09	942.8025667	-3.694999285	0.620997333	-5.950104914	2.68E-09	6.03E-08
ENSG00000132677	RHBG	1.69E-12	575.7504178	-5.086641784	0.854869042	-5.95020001	2.68E-09	6.03E-08
ENSG00000064601	CTSA	0.007208848	4788.276625	-1.477387452	0.248397679	-5.947670118	2.72E-09	6.12E-08
ENSG00000134463	ECHDC3	5.13E-06	1376.443205	-2.795418235	0.470010342	-5.947567506	2.72E-09	6.12E-08
ENSG00000174292	TNK1	0.002272946	593.199746	-2.07753151	0.34936084	-5.946663945	2.74E-09	6.14E-08
ENSG00000198795	ZNF521	8.99E-08	3966.309535	2.997239316	0.504194461	5.944609767	2.77E-09	6.22E-08
ENSG00000114993	RTKN	4.63E-08	14826.03324	-3.007899398	0.506118075	-5.943078403	2.80E-09	6.27E-08
ENSG00000104889	RNASEH2A	0.000163488	756.265253	2.527357589	0.425957576	5.933355178	2.97E-09	6.64E-08
ENSG00000143845	ETNK2	6.44E-07	3764.515093	-2.639356688	0.44497248	-5.931505446	3.00E-09	6.71E-08
ENSG00000134247	PTGFRN	0.000165882	8567.453495	2.115518449	0.356702098	5.930770974	3.02E-09	6.73E-08
ENSG00000135929	CYP27A1	0.001234756	2664.740343	-1.790634773	0.301919988	-5.930825539	3.01E-09	6.73E-08
ENSG00000131941	RHPN2	0.001386237	2257.337774	-1.841706139	0.310551799	-5.930431399	3.02E-09	6.73E-08
ENSG00000163873	GRIK3	1.69E-12	574.7849463	5.133917484	0.865682124	5.930488041	3.02E-09	6.73E-08
ENSG00000075461	CACNG4	1.77E-09	512.5339131	4.788249825	0.808560926	5.921940659	3.18E-09	7.07E-08
ENSG00000051180	RAD51	5.99E-06	273.4325971	3.422645506	0.578058358	5.920934206	3.20E-09	7.11E-08
ENSG00000085999	RAD54L	6.94E-08	454.051728	3.851512308	0.650617194	5.919782547	3.22E-09	7.14E-08
ENSG00000187626	ZKSCAN4	0.1117875	475.6131437	1.290681862	0.218182365	5.915610363	3.31E-09	7.30E-08
ENSG00000173599	PC	1.45E-06	6712.142466	-2.558310056	0.433008177	-5.908225739	3.46E-09	7.63E-08
ENSG00000107897	ACBD5	0.102622639	3389.912831	-0.975536949	0.165243551	-5.903631003	3.56E-09	7.84E-08
ENSG00000100167	SEPTIN3	2.32E-08	561.6278592	3.982780345	0.675309195	5.897713776	3.69E-09	8.12E-08
ENSG00000130052	STARD8	1.50E-05	2927.786867	-2.353084255	0.399520904	-5.889765042	3.87E-09	8.50E-08
ENSG00000176890	TYMS	1.37E-07	1413.130902	3.331253307	0.565769883	5.888000415	3.91E-09	8.58E-08
ENSG00000144857	BOC	0.000371185	3971.622771	2.020972314	0.343257767	5.887622976	3.92E-09	8.59E-08
ENSG00000163686	ABHD6	0.000696502	1229.259753	-2.070881061	0.351871114	-5.885339774	3.97E-09	8.69E-08
ENSG00000204856	FAM216A	0.033855509	229.4682266	1.70458237	0.289633127	5.885315632	3.97E-09	8.69E-08
ENSG00000168065	SLC22A11	4.21E-20	3048.861891	-5.468455872	0.930154801	-5.879081491	4.13E-09	9.01E-08
ENSG00000270882	H4C14	2.73E-10	13195.50573	3.604720154	0.613183944	5.878692991	4.14E-09	9.02E-08
ENSG00000178234	GALNT11	0.000343696	11423.47613	-1.943831818	0.330879156	-5.874748479	4.23E-09	9.22E-08
ENSG00000119139	TJP2	0.001003137	10658.72637	-1.797357972	0.306244977	-5.869020246	4.38E-09	9.50E-08
ENSG00000139433	GLTP	8.92E-05	3911.371487	-2.079026803	0.354290893	-5.868135036	4.41E-09	9.55E-08
ENSG00000152056	AP1S3	7.80E-07	1405.175169	-2.955103259	0.503962602	-5.863735219	4.53E-09	9.78E-08
ENSG00000160209	PDXK	0.001781794	32772.82475	-1.801731258	0.307383651	-5.861506468	4.59E-09	9.90E-08
ENSG00000178363	CALML3	2.36E-20	1429.337016	-6.192326585	1.056537851	-5.860960477	4.60E-09	9.91E-08
ENSG00000159399	HK2	8.32E-09	3440.174593	3.192827752	0.544917628	5.859285128	4.65E-09	1.00E-07
ENSG00000213373	LINC00671	4.19E-17	1194.058528	-5.619941124	0.959655019	-5.856209798	4.74E-09	1.02E-07
ENSG00000011426	ANLN	9.06E-12	901.1698434	4.882030333	0.834522741	5.850086634	4.91E-09	1.05E-07
ENSG00000204387	SNHG32	0.095549246	5213.030303	1.052824702	0.179984114	5.849542369	4.93E-09	1.06E-07
ENSG00000132361	CLUH	1.09E-05	14254.41755	-2.424367828	0.414484356	-5.849117803	4.94E-09	1.06E-07
ENSG00000148426	PROSER2	1.22E-05	877.7336463	-3.068428062	0.524634955	-5.848691613	4.95E-09	1.06E-07
ENSG00000145103	ILDR1	1.61E-07	791.8513441	-3.346587272	0.57270889	-5.84343517	5.11E-09	1.09E-07
ENSG00000168528	SERINC2	1.12E-05	3782.078593	-2.368151751	0.405257932	-5.843566681	5.11E-09	1.09E-07
ENSG00000185432	METTL7A	3.91E-09	59631.40498	-3.640217794	0.623033838	-5.842728871	5.14E-09	1.09E-07
ENSG00000051341	POLQ	4.21E-09	447.2410014	4.35265127	0.745008303	5.842419815	5.14E-09	1.09E-07
ENSG00000072201	LNX1	4.38E-09	805.6636695	-3.834634167	0.656586902	-5.840253824	5.21E-09	1.11E-07
ENSG00000174371	EXO1	9.68E-09	295.5978476	4.61985061	0.791029246	5.840303167	5.21E-09	1.11E-07
ENSG00000161533	ACOX1	0.001870329	8123.759859	-1.683015415	0.288235734	-5.839024169	5.25E-09	1.11E-07
ENSG00000123358	NR4A1	1.48E-07	25361.59773	-2.907572881	0.498032738	-5.838115964	5.28E-09	1.12E-07
ENSG00000186951	PPARA	2.38E-05	5273.111997	-2.219244618	0.380171956	-5.837475865	5.30E-09	1.12E-07
ENSG00000089847	ANKRD24	4.41E-06	657.3703127	-3.00229444	0.514342916	-5.837145503	5.31E-09	1.12E-07
ENSG00000121898	CPXM2	0.000552354	1186.896337	-2.125361308	0.364580687	-5.829604759	5.56E-09	1.17E-07
ENSG00000085552	IGSF9	4.70E-12	2471.99642	4.006290991	0.687292997	5.829087464	5.57E-09	1.17E-07
ENSG00000105875	WDR91	0.003130528	3966.229877	-1.619105506	0.277913259	-5.825938314	5.68E-09	1.19E-07
ENSG00000276293	PIP4K2B	0.130366057	7536.763004	0.975429607	0.167538048	5.822137836	5.81E-09	1.22E-07
ENSG00000158089	GALNT14	4.39E-11	5062.859758	-3.490933815	0.599965836	-5.818554333	5.94E-09	1.24E-07
ENSG00000104419	NDRG1	2.48E-06	27922.56093	-2.647517375	0.45514411	-5.816877154	6.00E-09	1.25E-07
ENSG00000250799	PRODH2	2.03E-21	15064.55124	-5.739884104	0.987120489	-5.81477557	6.07E-09	1.27E-07
ENSG00000107485	GATA3	5.08E-09	1579.536477	-3.54099864	0.609396907	-5.810660668	6.22E-09	1.30E-07
ENSG00000162896	PIGR	2.79E-18	43103.02022	-5.495989585	0.946758767	-5.805058033	6.43E-09	1.34E-07
ENSG00000155966	AFF2	5.98E-08	573.9800013	3.93382636	0.677697447	5.804694083	6.45E-09	1.34E-07
ENSG00000188162	OTOG	9.10E-10	273.5804142	4.739823435	0.816678107	5.803784127	6.48E-09	1.35E-07
ENSG00000134057	CCNB1	6.01E-07	892.3039159	3.283665515	0.566123628	5.800262265	6.62E-09	1.37E-07
ENSG00000069020	MAST4	0.016523655	6419.477022	-1.322335394	0.22799497	-5.799844588	6.64E-09	1.38E-07
ENSG00000163884	KLF15	8.49E-08	2396.126771	-3.15576106	0.544232533	-5.798552771	6.69E-09	1.38E-07
ENSG00000134574	DDB2	0.036294132	932.4948035	1.4810812	0.255473124	5.797405138	6.73E-09	1.39E-07
ENSG00000169026	SLC49A3	4.33E-07	947.6410953	-3.224402818	0.556698286	-5.7920114	6.95E-09	1.44E-07
ENSG00000139835	GRTP1	3.28E-05	822.2301493	-2.602054759	0.44929912	-5.791364019	6.98E-09	1.44E-07
ENSG00000230426	LINC01036	0.00026964	172.2737733	2.959595072	0.511247116	5.788971673	7.08E-09	1.46E-07
ENSG00000153446	C16orf89	7.91E-10	1018.759505	-4.083305397	0.705987668	-5.783819725	7.30E-09	1.50E-07
ENSG00000171345	KRT19	0.00019471	5824.047322	-1.920702003	0.332296238	-5.780089523	7.47E-09	1.53E-07
ENSG00000215492	HNRNPA1P7	0.00061345	16949.42889	1.992229199	0.344746666	5.778820781	7.52E-09	1.54E-07
ENSG00000183779	ZNF703	2.31E-08	4999.332154	2.983867839	0.516360982	5.778647	7.53E-09	1.54E-07
ENSG00000124549	BTN2A3P	0.029165904	456.9615785	1.645238614	0.284750551	5.777824168	7.57E-09	1.55E-07
ENSG00000099219	ERMP1	0.002400382	10088.70525	-1.643861787	0.28490521	-5.769855122	7.93E-09	1.62E-07
ENSG00000243955	GSTA1	1.44E-22	3010.849888	-6.604303021	1.144608438	-5.769923411	7.93E-09	1.62E-07
ENSG00000187193	MT1X	4.06E-07	1210.049942	-3.125754068	0.541904835	-5.768086692	8.02E-09	1.63E-07
ENSG00000157456	CCNB2	4.85E-11	311.0258409	5.435640013	0.942640547	5.766397415	8.10E-09	1.65E-07
ENSG00000158856	DMTN	1.60E-05	7265.360069	-2.28865365	0.397153705	-5.762639563	8.28E-09	1.68E-07
ENSG00000012124	CD22	6.47E-05	515.7099682	2.873360553	0.499479459	5.752710152	8.78E-09	1.78E-07
ENSG00000167588	GPD1	4.71E-15	6792.88452	-4.529359505	0.787531504	-5.751337544	8.85E-09	1.80E-07
ENSG00000172831	CES2	0.002127862	7548.187214	-1.676621084	0.291541375	-5.750885559	8.88E-09	1.80E-07
ENSG00000198885	ITPRIPL1	9.72E-06	300.5152527	3.244205752	0.564240348	5.74968764	8.94E-09	1.81E-07
ENSG00000254585	MAGEL2	0.000101408	266.3418599	2.983058418	0.519109265	5.746494275	9.11E-09	1.84E-07
ENSG00000143375	CGN	1.69E-08	6144.452243	-2.999529083	0.522023221	-5.745968686	9.14E-09	1.84E-07
ENSG00000135917	SLC19A3	7.17E-13	1357.575829	-4.503678976	0.784238267	-5.742743203	9.32E-09	1.88E-07
ENSG00000197467	COL13A1	9.86E-14	4722.487462	4.077624615	0.710213622	5.741405805	9.39E-09	1.89E-07
ENSG00000104237	RP1	1.15E-07	249.35077	-4.031005587	0.702118099	-5.741207344	9.40E-09	1.89E-07
ENSG00000163827	LRRC2	1.50E-07	992.4438629	-3.334246257	0.580977682	-5.739026404	9.52E-09	1.91E-07
ENSG00000027644	INSRR	1.20E-07	361.0527639	-3.840863851	0.66938456	-5.737903263	9.59E-09	1.92E-07
ENSG00000163808	KIF15	2.87E-14	790.4324787	5.616449953	0.978896145	5.737534042	9.61E-09	1.93E-07
ENSG00000117632	STMN1	2.35E-09	10370.59182	3.308379092	0.577078083	5.732983438	9.87E-09	1.97E-07
ENSG00000185345	PRKN	0.000517788	1263.009904	-2.16224638	0.377220246	-5.732052835	9.92E-09	1.98E-07
ENSG00000186897	C1QL4	1.04E-10	800.3937979	4.335339666	0.757118767	5.726102503	1.03E-08	2.05E-07
ENSG00000182463	TSHZ2	2.85E-05	4231.196098	2.312059515	0.403974708	5.723277885	1.04E-08	2.08E-07
ENSG00000181191	PJA1	0.013635525	3154.537249	1.48830822	0.260100818	5.722043596	1.05E-08	2.09E-07
ENSG00000240764	PCDHGC5	0.027096313	418.1164675	1.700921066	0.297329343	5.72066331	1.06E-08	2.11E-07
ENSG00000119411	BSPRY	6.11E-08	862.711626	-3.503482494	0.613103874	-5.714337561	1.10E-08	2.18E-07
ENSG00000161888	SPC24	1.21E-12	2008.505837	4.285111553	0.750013402	5.713379979	1.11E-08	2.19E-07
ENSG00000185896	LAMP1	0.089583697	15234.21827	-1.027391892	0.179858669	-5.712217797	1.12E-08	2.20E-07
ENSG00000125966	MMP24	9.45E-07	917.7614965	-3.093356154	0.541606118	-5.711449804	1.12E-08	2.21E-07
ENSG00000276368	H2AC14	1.89E-16	1677.064154	5.389119575	0.943661417	5.710861411	1.12E-08	2.22E-07
ENSG00000109610	SOD3	7.66E-13	8936.454027	-4.162251648	0.728882314	-5.710457738	1.13E-08	2.22E-07
ENSG00000124564	SLC17A3	5.90E-19	684.6803676	-6.909805373	1.210115123	-5.710039681	1.13E-08	2.22E-07
ENSG00000075702	WDR62	2.41E-07	661.6125556	3.476951654	0.609466411	5.704911041	1.16E-08	2.29E-07
ENSG00000128596	CCDC136	1.07E-06	734.4061138	3.251598048	0.570152152	5.703035645	1.18E-08	2.31E-07
ENSG00000112539	C6orf118	2.16E-05	188.1805385	3.283334466	0.575904795	5.701175772	1.19E-08	2.34E-07
ENSG00000108479	GALK1	0.000155643	1769.353738	-2.225452206	0.390737162	-5.695522266	1.23E-08	2.41E-07
ENSG00000166292	TMEM100	1.55E-10	1250.397444	4.483978484	0.787504212	5.693910481	1.24E-08	2.43E-07
ENSG00000134986	NREP	7.97E-08	13259.57631	3.004092598	0.527847421	5.691213935	1.26E-08	2.47E-07
ENSG00000152822	GRM1	0.000188842	241.6243296	-2.788084446	0.490018892	-5.689748893	1.27E-08	2.48E-07
ENSG00000183853	KIRREL1	0.000356195	13303.25634	2.00101543	0.351798365	5.687961142	1.29E-08	2.51E-07
ENSG00000131400	NAPSA	4.10E-13	3143.207251	-4.225263654	0.742903454	-5.687500353	1.29E-08	2.51E-07
ENSG00000094804	CDC6	1.06E-08	897.6059977	3.729814952	0.655811073	5.687331465	1.29E-08	2.51E-07
ENSG00000257167	TMPO-AS1	0.001123854	150.9254561	2.513851256	0.442203393	5.684830324	1.31E-08	2.54E-07
ENSG00000142731	PLK4	6.87E-05	284.268061	3.044609161	0.535683683	5.68359511	1.32E-08	2.56E-07
ENSG00000179163	FUCA1	0.020956143	1916.246687	-1.393235746	0.245184887	-5.682388352	1.33E-08	2.58E-07
ENSG00000108439	PNPO	0.000468643	3363.14343	-1.909665089	0.336320571	-5.678109674	1.36E-08	2.64E-07
ENSG00000078070	MCCC1	0.033300049	3108.076697	-1.244386202	0.219367499	-5.672609688	1.41E-08	2.72E-07
ENSG00000135378	PRRG4	6.25E-11	2313.623833	-3.75905378	0.662734452	-5.672036162	1.41E-08	2.72E-07
ENSG00000087299	L2HGDH	6.77E-06	2766.133724	-2.529798385	0.446056803	-5.671471367	1.42E-08	2.73E-07
ENSG00000162817	C1orf115	1.58E-07	4655.032063	-2.757784862	0.486343713	-5.670444147	1.42E-08	2.74E-07
ENSG00000223802	CERS1	4.19E-05	214.0039316	3.154966087	0.556793852	5.666309128	1.46E-08	2.81E-07
ENSG00000174306	ZHX3	8.75E-05	7896.337781	-2.060994204	0.363835901	-5.664625728	1.47E-08	2.83E-07
ENSG00000236830	CBR3-AS1	4.60E-06	858.6566565	-2.860379273	0.505204746	-5.661821851	1.50E-08	2.88E-07
ENSG00000112118	MCM3	0.000453422	8637.988948	1.961786734	0.346629873	5.659600886	1.52E-08	2.91E-07
ENSG00000171649	ZIK1	0.000972627	721.0714098	2.276107352	0.402176111	5.659479249	1.52E-08	2.91E-07
ENSG00000135744	AGT	4.43E-10	1413.372621	-3.865524286	0.683131783	-5.658533802	1.53E-08	2.92E-07
ENSG00000136883	KIF12	2.50E-09	10598.76454	-3.377004446	0.597027926	-5.656359278	1.55E-08	2.96E-07
ENSG00000187372	PCDHB13	0.007453271	1033.566582	1.820582817	0.321898341	5.655769497	1.55E-08	2.96E-07
ENSG00000149972	CNTN5	1.05E-16	1818.018967	5.366943581	0.949098153	5.654782452	1.56E-08	2.98E-07
ENSG00000070182	SPTB	1.03E-08	13754.25189	3.234524026	0.572324772	5.651553424	1.59E-08	3.03E-07
ENSG00000141391	PRELID3A	0.012559756	297.1004758	1.942841601	0.343777229	5.651455178	1.59E-08	3.03E-07
ENSG00000166803	PCLAF	9.68E-07	364.5954047	3.552049017	0.628986886	5.647254497	1.63E-08	3.10E-07
ENSG00000168907	PLA2G4F	2.44E-10	1518.609565	-3.979870649	0.704999154	-5.645213372	1.65E-08	3.14E-07
ENSG00000100490	CDKL1	6.59E-06	1737.346944	-2.824471362	0.50044026	-5.643973091	1.66E-08	3.16E-07
ENSG00000151012	SLC7A11	2.13E-10	705.9097957	4.432887457	0.785491205	5.643459058	1.67E-08	3.17E-07
ENSG00000249158	PCDHA11	0.002896543	364.2120926	2.255784019	0.399743162	5.643083441	1.67E-08	3.17E-07
ENSG00000182272	B4GALNT4	1.80E-17	8700.016907	4.87583265	0.86447558	5.640220222	1.70E-08	3.22E-07
ENSG00000244005	NFS1	0.029810553	1369.239866	-1.388231162	0.246268061	-5.637073504	1.73E-08	3.27E-07
ENSG00000173011	TADA2B	0.084187182	3709.383518	-1.004988456	0.178299238	-5.636526939	1.74E-08	3.28E-07
ENSG00000121005	CRISPLD1	1.00E-05	572.8946554	3.099643996	0.550108288	5.634606971	1.75E-08	3.31E-07
ENSG00000171124	FUT3	1.06E-06	227.364602	-3.929737282	0.697554903	-5.633588505	1.76E-08	3.33E-07
ENSG00000145685	LHFPL2	0.000760921	2187.988155	2.015935436	0.357901038	5.632661602	1.77E-08	3.35E-07
ENSG00000171105	INSR	0.001898223	16971.43148	-1.743053915	0.309540251	-5.631105846	1.79E-08	3.37E-07
ENSG00000144560	VGLL4	0.102357031	7150.565887	1.034727325	0.183774668	5.630413233	1.80E-08	3.38E-07
ENSG00000185551	NR2F2	0.00696886	20389.2614	1.61805046	0.287486312	5.628269556	1.82E-08	3.42E-07
ENSG00000148702	HABP2	1.48E-06	303.0181236	-3.509113974	0.623510384	-5.627996042	1.82E-08	3.42E-07
ENSG00000140937	CDH11	1.00E-07	10634.59254	3.011210538	0.535132481	5.627037495	1.83E-08	3.44E-07
ENSG00000160298	C21orf58	2.40E-08	1677.057447	3.376877674	0.600126782	5.626940463	1.83E-08	3.44E-07
ENSG00000154783	FGD5	0.000162933	7165.290158	-2.026810029	0.360284459	-5.625582726	1.85E-08	3.46E-07
ENSG00000119138	KLF9	1.88E-05	13627.97729	-2.336821619	0.415439238	-5.624942003	1.86E-08	3.47E-07
ENSG00000128242	GAL3ST1	8.73E-10	833.1776121	-3.992586837	0.710351671	-5.620577804	1.90E-08	3.55E-07
ENSG00000173269	MMRN2	2.11E-05	4651.967376	-2.238971901	0.398537023	-5.617977175	1.93E-08	3.60E-07
ENSG00000129151	BBOX1	8.41E-21	2115.4884	-6.240886435	1.111962284	-5.612498304	1.99E-08	3.72E-07
ENSG00000171551	ECEL1	1.95E-13	1785.086761	4.811293202	0.857387689	5.611572528	2.00E-08	3.73E-07
ENSG00000196586	MYO6	0.002123185	10595.44059	-1.686846966	0.300894006	-5.606116888	2.07E-08	3.85E-07
ENSG00000182472	CAPN12	2.35E-09	922.2642917	-3.850351548	0.686899237	-5.60540956	2.08E-08	3.86E-07
ENSG00000158769	F11R	0.012421402	7286.744785	-1.369691215	0.244480504	-5.602455801	2.11E-08	3.92E-07
ENSG00000183763	TRAIP	0.000119642	277.2672701	2.876650947	0.513759838	5.599213356	2.15E-08	3.99E-07
ENSG00000276180	H4C9	2.12E-10	3898.338447	3.574307091	0.638514011	5.597852245	2.17E-08	4.01E-07
ENSG00000185634	SHC4	2.19E-08	266.455965	4.524986829	0.808558848	5.596360541	2.19E-08	4.05E-07
ENSG00000115616	SLC9A2	1.03E-07	402.7184994	-3.788674318	0.677031305	-5.596010536	2.19E-08	4.05E-07
ENSG00000185008	ROBO2	2.55E-11	6084.408019	3.712675172	0.665049226	5.582556936	2.37E-08	4.36E-07
ENSG00000004948	CALCR	1.14E-05	163.7610884	-4.046306463	0.724858825	-5.582199355	2.37E-08	4.36E-07
ENSG00000162745	OLFML2B	1.56E-08	2286.880414	3.289469452	0.589359174	5.581434205	2.39E-08	4.38E-07
ENSG00000274173	LINC02967	1.80E-11	170.900467	-5.452213704	0.977376977	-5.578414301	2.43E-08	4.45E-07
ENSG00000130508	PXDN	4.62E-05	15576.41188	2.326170054	0.417055293	5.577605875	2.44E-08	4.46E-07
ENSG00000129596	CDO1	2.76E-05	417.3451992	2.983808846	0.535057543	5.576612988	2.45E-08	4.48E-07
ENSG00000125319	HROB	1.54E-05	328.4174076	3.152893938	0.565417582	5.576221966	2.46E-08	4.49E-07
ENSG00000095777	MYO3A	3.85E-07	322.9647762	3.733257917	0.669619737	5.575190979	2.47E-08	4.51E-07
ENSG00000040608	RTN4R	2.98E-05	294.6352772	3.087369497	0.553853373	5.574344489	2.48E-08	4.53E-07
ENSG00000099377	HSD3B7	1.77E-05	1534.793239	-2.519649883	0.452068628	-5.573600396	2.50E-08	4.54E-07
ENSG00000103966	EHD4	0.063952742	4179.615383	-1.071244144	0.192199443	-5.573606913	2.50E-08	4.54E-07
ENSG00000105953	OGDH	0.008666892	14478.76692	-1.495173445	0.268341292	-5.571909682	2.52E-08	4.58E-07
ENSG00000156709	AIFM1	0.001704023	4358.462956	-1.709618514	0.306923463	-5.570178628	2.54E-08	4.61E-07
ENSG00000158109	TPRG1L	0.007646992	2089.751698	-1.591465202	0.285720121	-5.570014437	2.55E-08	4.61E-07
ENSG00000165323	FAT3	4.98E-13	10708.06402	4.715034316	0.846588266	5.569453895	2.56E-08	4.62E-07
ENSG00000205436	EXOC3L4	4.42E-07	684.2026396	-3.354507795	0.602316653	-5.569342605	2.56E-08	4.62E-07
ENSG00000044524	EPHA3	2.50E-15	1727.451441	5.081869532	0.912527513	5.569004178	2.56E-08	4.63E-07
ENSG00000107611	CUBN	1.64E-14	55572.19857	-4.677238204	0.840256159	-5.566443226	2.60E-08	4.69E-07
ENSG00000131979	GCH1	0.005793568	817.862859	-1.851657159	0.332765554	-5.56444962	2.63E-08	4.74E-07
ENSG00000205279	CTXN3	2.49E-13	322.9127321	-5.891260058	1.058828275	-5.563942897	2.64E-08	4.75E-07
ENSG00000166165	CKB	9.20E-06	6592.45387	-2.342653699	0.421066474	-5.563619622	2.64E-08	4.76E-07
ENSG00000124635	H2BC11	6.17E-13	1202.122675	4.822645886	0.86717385	5.561336847	2.68E-08	4.81E-07
ENSG00000112715	VEGFA	0.003485014	21161.55376	-1.693971392	0.304720117	-5.559105873	2.71E-08	4.87E-07
ENSG00000121753	ADGRB2	8.95E-08	2741.752625	3.030501457	0.545522509	5.555227161	2.77E-08	4.97E-07
ENSG00000157184	CPT2	0.011165329	1708.078143	-1.56542557	0.281806867	-5.55495892	2.78E-08	4.97E-07
ENSG00000217555	CKLF	0.11853797	662.917535	1.206931062	0.217322201	5.553648257	2.80E-08	5.00E-07
ENSG00000184988	TMEM106A	7.96E-07	3987.059561	-2.756793593	0.496424708	-5.553296496	2.80E-08	5.01E-07
ENSG00000134222	PSRC1	8.11E-06	952.1501371	2.889806577	0.520730038	5.54952925	2.86E-08	5.11E-07
ENSG00000167880	EVPL	1.81E-08	11060.26781	-3.087230802	0.556373631	-5.548844571	2.88E-08	5.12E-07
ENSG00000134317	GRHL1	0.003184741	260.2007463	-2.194919581	0.395617012	-5.548092011	2.89E-08	5.13E-07
ENSG00000175093	SPSB4	1.07E-09	966.1176421	4.004507057	0.721773047	5.54815267	2.89E-08	5.13E-07
ENSG00000175643	RMI2	0.000523462	585.8458824	2.440410333	0.439893095	5.547735026	2.89E-08	5.14E-07
ENSG00000133116	KL	4.43E-18	6819.343506	-4.942116219	0.891375066	-5.544373419	2.95E-08	5.23E-07
ENSG00000178175	ZNF366	0.010342918	473.4676318	-1.808152419	0.326242783	-5.542352235	2.98E-08	5.29E-07
ENSG00000148926	ADM	1.73E-05	2527.678193	-2.403219381	0.433816648	-5.539712202	3.03E-08	5.35E-07
ENSG00000162882	HAAO	1.62E-06	2541.863958	-2.650055675	0.478514482	-5.538088763	3.06E-08	5.40E-07
ENSG00000111602	TIMELESS	8.12E-06	3941.5574	2.437002515	0.440167969	5.536528517	3.09E-08	5.43E-07
ENSG00000144554	FANCD2	1.33E-05	887.3769292	2.902744038	0.524681874	5.532388642	3.16E-08	5.55E-07
ENSG00000253767	PCDHGA8	0.005737652	805.5722068	1.905233008	0.344380457	5.532349379	3.16E-08	5.55E-07
ENSG00000007237	GAS7	5.84E-05	2868.101001	2.314529886	0.418429777	5.531465517	3.18E-08	5.57E-07
ENSG00000151552	QDPR	0.002215842	3129.880542	-1.690154326	0.305595259	-5.530695508	3.19E-08	5.59E-07
ENSG00000128165	ADM2	1.09E-12	2150.454629	-4.116442358	0.744318189	-5.530487391	3.19E-08	5.59E-07
ENSG00000042286	AIFM2	0.09224801	862.3831002	-1.166450705	0.210952305	-5.52945229	3.21E-08	5.62E-07
ENSG00000172575	RASGRP1	0.00029882	466.0048519	-2.522537624	0.456301366	-5.528227203	3.23E-08	5.66E-07
ENSG00000109906	ZBTB16	1.04E-08	4344.34047	-3.043605476	0.550655167	-5.527244015	3.25E-08	5.68E-07
ENSG00000151726	ACSL1	3.34E-09	7290.039	-3.154710783	0.571201725	-5.522936373	3.33E-08	5.82E-07
ENSG00000196296	ATP2A1	6.01E-06	367.0582301	3.325489313	0.602411186	5.520298078	3.38E-08	5.90E-07
ENSG00000189143	CLDN4	3.39E-05	11963.31651	-2.243355845	0.406409351	-5.519941502	3.39E-08	5.91E-07
ENSG00000149403	GRIK4	1.36E-06	260.8607665	3.983464328	0.722204829	5.515698828	3.47E-08	6.05E-07
ENSG00000171552	BCL2L1	0.075609322	8591.751137	-1.032950217	0.187319029	-5.514390203	3.50E-08	6.08E-07
ENSG00000132698	RAB25	8.27E-08	490.3667162	-3.804248276	0.690072833	-5.512821391	3.53E-08	6.13E-07
ENSG00000225697	SLC26A6	0.001265753	1963.919258	-1.889389109	0.3429212	-5.509688839	3.59E-08	6.24E-07
ENSG00000158113	LRRC43	0.002821852	377.7308315	-2.18391448	0.396564992	-5.507078344	3.65E-08	6.32E-07
ENSG00000066813	ACSM2B	3.76E-23	14021.58375	-6.125578061	1.112434163	-5.506463451	3.66E-08	6.34E-07
ENSG00000130816	DNMT1	0.000649264	6504.116488	1.880489544	0.341613164	5.504733846	3.70E-08	6.39E-07
ENSG00000122679	RAMP3	3.49E-05	1344.908361	-2.571691966	0.467475699	-5.501231337	3.77E-08	6.52E-07
ENSG00000129351	ILF3	0.018259883	27188.59822	1.44944655	0.2635603	5.499487415	3.81E-08	6.58E-07
ENSG00000116717	GADD45A	8.34E-07	8744.004743	-2.652995066	0.482488898	-5.498561893	3.83E-08	6.61E-07
ENSG00000168350	DEGS2	8.91E-06	839.2931528	-2.933871549	0.533590571	-5.498357183	3.83E-08	6.61E-07
ENSG00000162849	KIF26B	3.20E-09	25614.72349	3.481770387	0.63328591	5.497943868	3.84E-08	6.62E-07
ENSG00000007216	SLC13A2	6.19E-22	2001.082369	-6.231782875	1.13371716	-5.496770355	3.87E-08	6.66E-07
ENSG00000122359	ANXA11	0.001102031	9103.290938	-1.7673271	0.321559741	-5.496108112	3.88E-08	6.67E-07
ENSG00000142178	SIK1	8.66E-06	6822.165925	-2.355701923	0.429021061	-5.490877105	4.00E-08	6.86E-07
ENSG00000172818	OVOL1	1.32E-10	1481.661942	-3.867252686	0.704405352	-5.490095547	4.02E-08	6.88E-07
ENSG00000179178	TMEM125	1.76E-06	588.7266094	-3.375125939	0.614752414	-5.490219905	4.01E-08	6.88E-07
ENSG00000131069	ACSS2	0.000385371	2846.896699	-1.954494216	0.356413585	-5.483781483	4.16E-08	7.12E-07
ENSG00000074370	ATP2A3	1.05E-05	2462.166837	-2.43168096	0.443580492	-5.481938458	4.21E-08	7.19E-07
ENSG00000092051	JPH4	3.41E-11	6886.078037	3.630895458	0.662665309	5.479229726	4.27E-08	7.29E-07
ENSG00000137714	FDX1	0.021506282	1179.407068	-1.488820708	0.27180937	-5.477444377	4.32E-08	7.35E-07
ENSG00000164683	HEY1	3.07E-07	1034.273127	3.341449287	0.61017359	5.476227322	4.34E-08	7.39E-07
ENSG00000154380	ENAH	0.001207325	14618.54653	1.877006203	0.342972659	5.472757529	4.43E-08	7.53E-07
ENSG00000140545	MFGE8	0.000453658	6215.39323	1.938145055	0.354181811	5.472175569	4.45E-08	7.55E-07
ENSG00000113211	PCDHB6	0.000100591	426.3061581	2.839868673	0.519147362	5.470255425	4.49E-08	7.63E-07
ENSG00000138778	CENPE	8.41E-09	491.2392127	4.323047146	0.791049599	5.464950807	4.63E-08	7.84E-07
ENSG00000071054	MAP4K4	0.000413131	14247.12497	2.037721133	0.37329859	5.458689611	4.80E-08	8.11E-07
ENSG00000212719	LINC02693	0.0461916	1591.827277	1.349097638	0.247207146	5.457356948	4.83E-08	8.16E-07
ENSG00000107338	SHB	0.000385371	3527.096695	-1.92881253	0.353472722	-5.456750722	4.85E-08	8.19E-07
ENSG00000109265	CRACD	6.78E-08	5887.489621	2.915777015	0.534371187	5.456463757	4.86E-08	8.19E-07
ENSG00000159348	CYB5R1	0.034444035	3292.097756	-1.202429663	0.220373903	-5.456316054	4.86E-08	8.19E-07
ENSG00000197903	H2BC12	1.44E-08	1890.504913	3.500264394	0.641524917	5.456162806	4.87E-08	8.20E-07
ENSG00000119969	HELLS	1.36E-06	2989.126983	2.675569721	0.49041958	5.45567475	4.88E-08	8.21E-07
ENSG00000102575	ACP5	2.22E-06	2535.06005	-2.598865808	0.476644481	-5.452419801	4.97E-08	8.35E-07
ENSG00000261371	PECAM1	0.042726813	8902.317146	-1.167542483	0.214186552	-5.45105409	5.01E-08	8.41E-07
ENSG00000154529	CNTNAP3B	2.15E-05	2625.013358	-2.343724315	0.430097934	-5.449280568	5.06E-08	8.49E-07
ENSG00000188242		6.53E-08	1974.424548	-3.142330752	0.576666405	-5.449130943	5.06E-08	8.49E-07
ENSG00000158352	SHROOM4	0.006936969	2999.218002	-1.531424029	0.281120553	-5.447570499	5.11E-08	8.56E-07
ENSG00000124181	PLCG1	0.005489796	10737.66807	1.607666654	0.295348971	5.443278324	5.23E-08	8.75E-07
ENSG00000253873	PCDHGA11	0.049978212	741.4413557	1.424459666	0.261691818	5.443271687	5.23E-08	8.75E-07
ENSG00000246877	DNM1P35	2.04E-05	206.7281985	3.288370373	0.604132923	5.443123937	5.24E-08	8.75E-07
ENSG00000177614	PGBD5	0.024391944	600.5905063	-1.557698805	0.286356417	-5.439720271	5.34E-08	8.91E-07
ENSG00000170385	SLC30A1	0.000120384	4104.624209	-2.034223576	0.373983731	-5.439337077	5.35E-08	8.92E-07
ENSG00000144655	CSRNP1	8.93E-06	12793.87603	-2.400087296	0.441568642	-5.435366251	5.47E-08	9.11E-07
ENSG00000137992	DBT	0.000930753	3341.951763	-1.830482408	0.337127807	-5.429639358	5.65E-08	9.38E-07
ENSG00000073111	MCM2	1.86E-08	8846.810217	3.068327465	0.565143145	5.429292548	5.66E-08	9.40E-07
ENSG00000158828	PINK1	0.012173897	7726.007984	-1.375610647	0.253423547	-5.428109039	5.70E-08	9.45E-07
ENSG00000131781	FMO5	1.84E-07	1185.867251	-3.237708867	0.596978002	-5.423497775	5.84E-08	9.67E-07
ENSG00000139618	BRCA2	0.000337577	363.6103727	2.655160185	0.489606225	5.423052342	5.86E-08	9.69E-07
ENSG00000147130	ZMYM3	0.038688763	5119.667819	1.239662165	0.228602457	5.422785833	5.87E-08	9.70E-07
ENSG00000128342	LIF	2.95E-11	4299.110843	-3.611180988	0.666002423	-5.422173949	5.89E-08	9.72E-07
ENSG00000112852	PCDHB2	2.34E-07	1612.034875	3.166777073	0.58416606	5.421022014	5.93E-08	9.78E-07
ENSG00000184363	PKP3	4.59E-05	242.3267862	-3.058611808	0.564245062	-5.420715243	5.94E-08	9.79E-07
ENSG00000213551	DNAJC9	0.002308044	2065.644702	1.847777541	0.340888634	5.420472718	5.94E-08	9.80E-07
ENSG00000134369	NAV1	0.007721853	5334.271758	1.531873734	0.282637059	5.41993234	5.96E-08	9.82E-07
ENSG00000042445	RETSAT	0.000201192	3576.884819	-2.002135949	0.36948754	-5.418683266	6.00E-08	9.87E-07
ENSG00000204444	APOM	4.32E-08	673.9796288	-3.683402805	0.679755565	-5.418716663	6.00E-08	9.87E-07
ENSG00000112655	PTK7	0.000847254	18737.97045	1.962404359	0.362432087	5.414543658	6.14E-08	1.01E-06
ENSG00000103150	MLYCD	0.038246457	3209.73188	-1.191095046	0.220030845	-5.413309421	6.19E-08	1.01E-06
ENSG00000109063	MYH3	3.54E-18	8606.776851	5.063401944	0.935531927	5.412324046	6.22E-08	1.02E-06
ENSG00000204576	PRR3	0.099591091	799.1127129	1.239680903	0.229170904	5.409416643	6.32E-08	1.04E-06
ENSG00000134250	NOTCH2	0.000607289	32192.7132	2.03454874	0.376366235	5.4057685	6.45E-08	1.05E-06
ENSG00000179348	GATA2	7.09E-06	1841.470647	-2.74034682	0.507125293	-5.403687925	6.53E-08	1.06E-06
ENSG00000169550	MUC15	1.84E-21	400.315841	-8.398414879	1.554917227	-5.401197395	6.62E-08	1.08E-06
ENSG00000119673	ACOT2	2.44E-08	6793.868812	-2.959676051	0.548309726	-5.397817896	6.75E-08	1.10E-06
ENSG00000143153	ATP1B1	4.17E-09	34310.29455	-3.386118031	0.627569107	-5.395609809	6.83E-08	1.11E-06
ENSG00000074219	TEAD2	8.19E-06	5412.407963	2.416812799	0.448016005	5.394478703	6.87E-08	1.12E-06
ENSG00000157399	ARSL	1.08E-12	3786.279452	-3.964368979	0.735145358	-5.392632814	6.94E-08	1.13E-06
ENSG00000066735	KIF26A	9.59E-09	2990.288822	-3.151439197	0.584557183	-5.391156399	7.00E-08	1.13E-06
ENSG00000102554	KLF5	3.51E-11	3727.726322	-3.79152108	0.7032869	-5.391144186	7.00E-08	1.13E-06
ENSG00000275713	H2BC9	1.15E-14	1384.882777	5.202293883	0.964953603	5.391237328	7.00E-08	1.13E-06
ENSG00000151704	KCNJ1	6.69E-23	3712.64519	-6.075758845	1.127453205	-5.388923297	7.09E-08	1.15E-06
ENSG00000079385	CEACAM1	1.97E-06	696.1444693	-3.21662573	0.597620732	-5.382386453	7.35E-08	1.19E-06
ENSG00000183077	AFMID	1.72E-05	4055.19273	-2.398277148	0.445828668	-5.379369516	7.47E-08	1.20E-06
ENSG00000104213	PDGFRL	6.50E-06	396.9704226	3.280707976	0.609960854	5.378554957	7.51E-08	1.21E-06
ENSG00000146072	TNFRSF21	0.000254693	7180.094858	-1.976078072	0.367544521	-5.376431852	7.60E-08	1.22E-06
ENSG00000152253	SPC25	1.67E-07	139.4226817	4.199057138	0.781355216	5.374069373	7.70E-08	1.24E-06
ENSG00000165376	CLDN2	1.55E-20	7738.144957	-5.393418437	1.003859324	-5.37268351	7.76E-08	1.25E-06
ENSG00000151725	CENPU	1.84E-07	263.1849519	4.273200077	0.795483858	5.371825002	7.79E-08	1.25E-06
ENSG00000160207	HSF2BP	0.003324587	212.2388161	2.272026725	0.423173334	5.369021488	7.92E-08	1.27E-06
ENSG00000130164	LDLR	4.14E-05	3708.017193	-2.233954617	0.41612127	-5.36851821	7.94E-08	1.27E-06
ENSG00000109685	NSD2	0.000530005	10334.11283	1.925371934	0.359086116	5.361866835	8.24E-08	1.31E-06
ENSG00000166589	CDH16	1.85E-16	31744.75925	-5.148295564	0.960214496	-5.361609917	8.25E-08	1.31E-06
ENSG00000160796	NBEAL2	0.009299148	5151.641871	-1.429485362	0.266630153	-5.361304219	8.26E-08	1.31E-06
ENSG00000171503	ETFDH	0.010641935	1662.689055	-1.586681694	0.29609671	-5.358660341	8.38E-08	1.33E-06
ENSG00000034510	TMSB10	0.0101112	27386.33154	1.592045231	0.297268556	5.355578977	8.53E-08	1.35E-06
ENSG00000106144	CASP2	0.021184723	3242.795174	1.391492286	0.259853981	5.354900782	8.56E-08	1.36E-06
ENSG00000079739	PGM1	0.011305481	2944.234419	-1.426333731	0.266383679	-5.354433628	8.58E-08	1.36E-06
ENSG00000272168	CASC15	4.14E-05	3152.067774	2.357683898	0.440415459	5.353317764	8.64E-08	1.37E-06
ENSG00000112297	CRYBG1	3.28E-08	3590.967857	-2.964489825	0.553996882	-5.351094788	8.74E-08	1.38E-06
ENSG00000131174	COX7B	0.016703926	1302.942957	-1.525518198	0.285102882	-5.350763856	8.76E-08	1.38E-06
ENSG00000196167	COLCA1	1.42E-05	1119.466598	-2.668646114	0.498744003	-5.350733235	8.76E-08	1.38E-06
ENSG00000165105	RASEF	0.004928119	1144.211669	-1.78084211	0.333051977	-5.3470396	8.94E-08	1.41E-06
ENSG00000163395	IGFN1	2.00E-09	1082.097922	4.147465462	0.77595805	5.34496093	9.04E-08	1.42E-06
ENSG00000121769	FABP3	1.45E-07	866.6553819	-3.370971579	0.630754605	-5.344347156	9.07E-08	1.42E-06
ENSG00000175556	LONRF3	5.47E-07	1237.548128	-3.103290553	0.581206334	-5.339395613	9.33E-08	1.46E-06
ENSG00000278588	H2BC10	2.11E-11	820.8844727	4.628807719	0.867602927	5.3351684	9.55E-08	1.49E-06
ENSG00000168280	KIF5C	0.000159499	901.4759968	2.4745725	0.464056463	5.332481495	9.69E-08	1.51E-06
ENSG00000184144	CNTN2	3.31E-05	167.0537268	3.264911702	0.612287786	5.33231558	9.70E-08	1.51E-06
ENSG00000166016	ABTB2	7.07E-05	4118.150814	-2.074668625	0.389242419	-5.330016775	9.82E-08	1.53E-06
ENSG00000091262	ABCC6	8.59E-15	6709.658638	-4.227807958	0.79365523	-5.327008247	9.98E-08	1.55E-06
ENSG00000180340	FZD2	1.54E-06	1037.705713	3.072297943	0.576776862	5.326666422	1.00E-07	1.56E-06
ENSG00000131389	SLC6A6	0.000166746	4972.560269	-2.034316024	0.382483465	-5.318703186	1.05E-07	1.62E-06
ENSG00000126457	PRMT1	0.010355446	5552.869048	1.471189191	0.276674482	5.317401087	1.05E-07	1.63E-06
ENSG00000134873	CLDN10	4.56E-14	1277.150767	-4.943585506	0.929832316	-5.316641959	1.06E-07	1.64E-06
ENSG00000189233	NUGGC	2.35E-07	606.0763655	-3.493379193	0.657122271	-5.316178354	1.06E-07	1.64E-06
ENSG00000157111	TMEM171	1.03E-06	381.9383453	-3.448972389	0.649072513	-5.313693493	1.07E-07	1.66E-06
ENSG00000116761	CTH	0.000819695	356.3459697	-2.481653277	0.467183014	-5.311950991	1.08E-07	1.68E-06
ENSG00000115977	AAK1	0.008967873	8644.388532	-1.434832418	0.270566378	-5.303069903	1.14E-07	1.76E-06
ENSG00000112320	SOBP	0.008508688	2169.127166	1.626814673	0.306802428	5.302483042	1.14E-07	1.76E-06
ENSG00000163293	NIPAL1	0.009271946	583.1747199	-1.841974528	0.347374144	-5.302566587	1.14E-07	1.76E-06
ENSG00000165449	SLC16A9	3.74E-10	4285.94816	-3.459681773	0.652836444	-5.299461759	1.16E-07	1.79E-06
ENSG00000169607	CKAP2L	2.74E-07	174.5986496	4.115916756	0.777039207	5.296922884	1.18E-07	1.81E-06
ENSG00000253368	TRNP1	1.85E-10	1816.432442	-3.901173052	0.7366985	-5.295481196	1.19E-07	1.82E-06
ENSG00000123416	TUBA1B	1.56E-05	19643.24238	2.43513945	0.459996827	5.29381793	1.20E-07	1.84E-06
ENSG00000235314	LINC00957	2.32E-08	1290.806941	-3.388180097	0.640142117	-5.29285608	1.20E-07	1.85E-06
ENSG00000128656	CHN1	9.98E-06	691.6315505	2.962801249	0.559842093	5.292208794	1.21E-07	1.85E-06
ENSG00000161681	SHANK1	2.16E-10	1190.65951	4.01351581	0.758427689	5.291889878	1.21E-07	1.85E-06
ENSG00000182901	RGS7	1.32E-07	486.2789562	3.75330979	0.709412591	5.290729035	1.22E-07	1.86E-06
ENSG00000113790	EHHADH	7.77E-10	4117.28788	-3.326629011	0.629227456	-5.286846556	1.24E-07	1.90E-06
ENSG00000137571	SLCO5A1	2.98E-09	346.3334215	4.444468145	0.840785802	5.286088481	1.25E-07	1.91E-06
ENSG00000181418	DDN	9.18E-09	1387.342339	-3.590785352	0.680151682	-5.279389063	1.30E-07	1.97E-06
ENSG00000105707	HPN	1.33E-13	10660.42057	-4.140817599	0.784582434	-5.277734272	1.31E-07	1.99E-06
ENSG00000110900	TSPAN11	6.46E-05	621.6065079	2.773943063	0.525661935	5.277047617	1.31E-07	1.99E-06
ENSG00000167711	SERPINF2	8.05E-12	3952.827	-3.816774741	0.723346536	-5.276550797	1.32E-07	2.00E-06
ENSG00000168495	POLR3D	0.12354541	2660.145678	1.026532844	0.194575253	5.275762599	1.32E-07	2.01E-06
ENSG00000171033	PKIA	0.000346881	472.533487	2.613504951	0.495406927	5.275471146	1.32E-07	2.01E-06
ENSG00000154975	CA10	9.45E-07	556.8351887	-3.395116082	0.643644026	-5.274835071	1.33E-07	2.01E-06
ENSG00000167513	CDT1	2.20E-09	1065.755161	3.83175794	0.726825657	5.271907926	1.35E-07	2.04E-06
ENSG00000151729	SLC25A4	0.001924816	3232.918411	-1.70424983	0.323550425	-5.26733918	1.38E-07	2.09E-06
ENSG00000277972	CISD3	0.000203894	1229.294656	-2.265955521	0.430301194	-5.265975444	1.39E-07	2.11E-06
ENSG00000133863	TEX15	4.99E-12	267.4984086	5.884947679	1.117640789	5.265509042	1.40E-07	2.11E-06
ENSG00000079308	TNS1	0.000658517	39112.78329	-1.966738856	0.374096004	-5.257310515	1.46E-07	2.20E-06
ENSG00000151503	NCAPD3	0.008351879	2364.444416	1.597652574	0.3040683	5.254255619	1.49E-07	2.23E-06
ENSG00000076864	RAP1GAP	1.43E-10	7717.67351	-3.449220208	0.657243972	-5.248005844	1.54E-07	2.31E-06
ENSG00000140450	ARRDC4	4.93E-06	5099.76575	-2.382672215	0.454043206	-5.247677279	1.54E-07	2.31E-06
ENSG00000157765	SLC34A2	1.94E-09	614.4275827	-4.188770281	0.798270154	-5.247309148	1.54E-07	2.31E-06
ENSG00000147647	DPYS	6.26E-20	6144.969739	-5.190394423	0.989278381	-5.246646975	1.55E-07	2.32E-06
ENSG00000198142	SOWAHC	3.28E-05	4047.757212	-2.224901913	0.424262559	-5.244162766	1.57E-07	2.35E-06
ENSG00000013810	TACC3	5.26E-08	3869.843004	2.973105878	0.567736657	5.236769272	1.63E-07	2.43E-06
ENSG00000162949	CAPN13	1.98E-06	378.275073	-3.416808519	0.653475209	-5.228673518	1.71E-07	2.54E-06
ENSG00000242612	DECR2	0.001363177	1754.991539	-1.909201411	0.365350681	-5.225668127	1.74E-07	2.58E-06
ENSG00000198756	COLGALT2	1.26E-10	1135.186098	4.33842178	0.830408677	5.224441772	1.75E-07	2.59E-06
ENSG00000198624	CCDC69	0.008744532	1085.418689	-1.664316111	0.318583996	-5.22410457	1.75E-07	2.60E-06
ENSG00000132780	NASP	0.000447296	11094.60337	1.949826321	0.373389303	5.221966196	1.77E-07	2.63E-06
ENSG00000100297	MCM5	0.00031296	4648.927077	1.972827931	0.377933686	5.220037281	1.79E-07	2.65E-06
ENSG00000163251	FZD5	6.80E-05	2257.242931	-2.273883806	0.435641046	-5.219627089	1.79E-07	2.66E-06
ENSG00000158467	AHCYL2	0.086660115	2560.28439	-1.054806454	0.202202455	-5.216585803	1.82E-07	2.70E-06
ENSG00000149679	CABLES2	0.019868334	364.1582553	1.786618945	0.342531271	5.215929459	1.83E-07	2.71E-06
ENSG00000181938	GINS3	0.010755139	235.262738	2.001362341	0.383734191	5.215491318	1.83E-07	2.71E-06
ENSG00000188833	ENTPD8	2.97E-06	297.9556197	-3.468378634	0.665006074	-5.215559333	1.83E-07	2.71E-06
ENSG00000106565	TMEM176B	3.19E-07	10592.21068	-2.711329783	0.520012238	-5.21397303	1.85E-07	2.73E-06
ENSG00000076826	CAMSAP3	7.42E-08	4847.838585	-2.782739212	0.533794797	-5.213125391	1.86E-07	2.74E-06
ENSG00000273274	ZBTB8B	8.64E-06	318.614222	3.300556048	0.633153441	5.212884958	1.86E-07	2.74E-06
ENSG00000185156	MFSD6L	0.000761223	160.3839955	-2.519657509	0.483399041	-5.212375894	1.86E-07	2.75E-06
ENSG00000163975	MELTF	2.45E-08	2410.138206	-3.235174166	0.620734366	-5.211849617	1.87E-07	2.75E-06
ENSG00000168621	GDNF	2.48E-09	1050.587943	3.882841768	0.745512449	5.208285624	1.91E-07	2.81E-06
ENSG00000270629	NBPF14	0.001872026	18450.7814	1.801816062	0.346034062	5.20704826	1.92E-07	2.82E-06
ENSG00000012048	BRCA1	0.001615964	947.2332091	2.055102614	0.39469363	5.206829945	1.92E-07	2.82E-06
ENSG00000162897	FCAMR	8.09E-18	1602.435275	-5.569333424	1.069651023	-5.20668265	1.92E-07	2.82E-06
ENSG00000154545	MAGED4	9.77E-06	648.4884768	3.013759389	0.578939973	5.205650898	1.93E-07	2.84E-06
ENSG00000168237	GLYCTK	6.51E-05	3000.955101	-2.286548304	0.439294407	-5.205047614	1.94E-07	2.84E-06
ENSG00000081803	CADPS2	1.87E-06	4143.470707	-2.482401425	0.4773062	-5.200857285	1.98E-07	2.91E-06
ENSG00000100162	CENPM	3.05E-07	417.3216767	3.697396191	0.711030649	5.20005178	1.99E-07	2.92E-06
ENSG00000118707	TGIF2	0.012793429	4832.548986	1.433148959	0.275640984	5.199331893	2.00E-07	2.93E-06
ENSG00000155592	ZKSCAN2	0.003536177	2164.694503	1.790862429	0.344658671	5.196046348	2.04E-07	2.98E-06
ENSG00000067082	KLF6	0.000430993	26125.98879	-1.992948169	0.383994523	-5.190043216	2.10E-07	3.06E-06
ENSG00000165959	CLMN	5.20E-05	9387.097682	-2.147776916	0.413833547	-5.189953623	2.10E-07	3.06E-06
ENSG00000063854	HAGH	0.000252216	5007.93342	-1.955076434	0.376846889	-5.187986131	2.13E-07	3.09E-06
ENSG00000110921	MVK	0.07702978	1405.414497	-1.159262325	0.22350505	-5.186738845	2.14E-07	3.10E-06
ENSG00000239672	NME1	0.000176131	2827.451044	2.161891979	0.416999636	5.184397754	2.17E-07	3.14E-06
ENSG00000122952	ZWINT	6.81E-06	1353.712921	2.787517472	0.538079727	5.180491541	2.21E-07	3.20E-06
ENSG00000108852	MPP2	0.001373765	1099.598116	2.08998585	0.403449805	5.180287175	2.22E-07	3.20E-06
ENSG00000175879	HOXD8	3.88E-05	3851.612565	-2.140427906	0.413341067	-5.17835772	2.24E-07	3.23E-06
ENSG00000162063	CCNF	2.85E-07	1592.015916	3.107544929	0.600355622	5.176173611	2.26E-07	3.27E-06
ENSG00000266028	SRGAP2	0.072746312	6444.250119	1.105424704	0.213663389	5.173673937	2.30E-07	3.31E-06
ENSG00000259479	SORD2P	1.85E-05	880.3115549	-2.674306721	0.516923137	-5.173509428	2.30E-07	3.31E-06
ENSG00000137124	ALDH1B1	0.000744884	4192.898437	-1.848877828	0.35756571	-5.170735833	2.33E-07	3.36E-06
ENSG00000127585	FBXL16	0.000384023	324.3162427	-2.58756865	0.501109396	-5.163680163	2.42E-07	3.48E-06
ENSG00000151617	EDNRA	5.49E-06	2435.802592	2.676619174	0.518671717	5.160526561	2.46E-07	3.54E-06
ENSG00000162490	DRAXIN	1.05E-06	710.0195493	3.342163562	0.648043209	5.157315923	2.51E-07	3.59E-06
ENSG00000163815	CLEC3B	0.000205274	825.9765436	-2.458732067	0.476860796	-5.15607927	2.52E-07	3.61E-06
ENSG00000121858	TNFSF10	3.20E-10	5022.129219	-3.393186741	0.658119374	-5.155883375	2.52E-07	3.61E-06
ENSG00000135502	SLC26A10	0.00149886	428.3053529	2.293645639	0.445033562	5.153871156	2.55E-07	3.64E-06
ENSG00000197461	PDGFA	0.012123288	4884.548083	-1.376280306	0.267098405	-5.152708812	2.57E-07	3.66E-06
ENSG00000049759	NEDD4L	0.004199234	10222.57138	-1.590732421	0.308751634	-5.152142514	2.58E-07	3.67E-06
ENSG00000178409	BEND3	0.006647865	1221.709633	1.78242424	0.345956701	5.152159897	2.58E-07	3.67E-06
ENSG00000105538	RASIP1	0.001368775	1283.656281	-1.998905927	0.387997201	-5.15185656	2.58E-07	3.67E-06
ENSG00000115649	CNPPD1	0.000389976	9134.234162	-1.919366585	0.372551514	-5.151949491	2.58E-07	3.67E-06
ENSG00000147536	GINS4	1.26E-05	1304.584187	2.726830916	0.529530553	5.149525177	2.61E-07	3.72E-06
ENSG00000138092	CENPO	0.000783105	1259.009433	2.134687891	0.414670471	5.147913924	2.63E-07	3.74E-06
ENSG00000277224	H2BC7	2.96E-12	1820.100074	4.340901544	0.843327649	5.147348781	2.64E-07	3.75E-06
ENSG00000198417	MT1F	8.67E-07	676.8411239	-3.286657051	0.638549114	-5.1470701	2.65E-07	3.75E-06
ENSG00000060762	MPC1	0.000361683	1356.26327	-2.181286122	0.423956115	-5.14507527	2.67E-07	3.79E-06
ENSG00000136861	CDK5RAP2	0.016046338	10450.96087	1.429230734	0.277800069	5.144817783	2.68E-07	3.79E-06
ENSG00000180190	TDRP	0.041952993	1634.347267	-1.282372105	0.249446439	-5.140871556	2.73E-07	3.87E-06
ENSG00000140284	SLC27A2	1.44E-13	2497.012346	-4.348349259	0.846017544	-5.139786155	2.75E-07	3.89E-06
ENSG00000240184	PCDHGC3	0.003918715	6538.014769	1.647104363	0.320628877	5.13710549	2.79E-07	3.94E-06
ENSG00000259956	RBM15B	0.052895326	7000.505593	1.181449821	0.22999625	5.136822096	2.79E-07	3.95E-06
ENSG00000180185	FAHD1	9.14E-07	6698.222607	-2.618489733	0.509769696	-5.13661317	2.80E-07	3.95E-06
ENSG00000111275	ALDH2	0.000246151	14010.25117	-2.021255399	0.393561974	-5.13579953	2.81E-07	3.96E-06
ENSG00000172167	MTBP	0.001940743	429.6127886	2.281670854	0.444256236	5.135934331	2.81E-07	3.96E-06
ENSG00000253313	C1orf210	4.40E-07	603.6249611	-3.448489506	0.671983436	-5.131807302	2.87E-07	4.04E-06
ENSG00000118257	NRP2	3.28E-06	6541.25619	2.599841818	0.506694148	5.130988443	2.88E-07	4.05E-06
ENSG00000134202	GSTM3	8.06E-07	3156.685927	-2.695241813	0.525313073	-5.130734317	2.89E-07	4.05E-06
ENSG00000164081	TEX264	0.015535057	3522.523356	-1.356030596	0.264315792	-5.130342709	2.89E-07	4.06E-06
ENSG00000233493	TMEM238	8.78E-09	761.3616405	-3.788168684	0.738427929	-5.130045242	2.90E-07	4.06E-06
ENSG00000142583	SLC2A5	1.74E-06	1233.586078	-2.936274432	0.572631326	-5.127687393	2.93E-07	4.10E-06
ENSG00000168496	FEN1	0.000668692	1516.249495	2.113926984	0.412258196	5.127677275	2.93E-07	4.10E-06
ENSG00000188064	WNT7B	3.05E-08	436.1518164	-3.944713462	0.769779501	-5.124471951	2.98E-07	4.16E-06
ENSG00000055955	ITIH4	0.022265909	355.6664594	-1.688096927	0.329441872	-5.124111624	2.99E-07	4.17E-06
ENSG00000275714	H3C1	3.73E-07	458.7976564	3.67280336	0.716794725	5.123926321	2.99E-07	4.17E-06
ENSG00000100417	PMM1	0.001206442	3412.572049	-1.764912983	0.344463129	-5.123662985	3.00E-07	4.17E-06
ENSG00000115355	CCDC88A	0.000196804	5057.566325	2.03233312	0.39668421	5.123302284	3.00E-07	4.18E-06
ENSG00000277157	H4C4	3.69E-10	4969.164481	3.438128076	0.671234733	5.122095009	3.02E-07	4.20E-06
ENSG00000162687	KCNT2	2.37E-06	602.3399191	3.336582368	0.651432385	5.121916636	3.02E-07	4.21E-06
ENSG00000277494	GPIHBP1	0.000603631	966.2030989	-2.137491822	0.417921484	-5.114577509	3.14E-07	4.36E-06
ENSG00000021645	NRXN3	3.57E-05	723.0388452	2.727998	0.533858168	5.109967711	3.22E-07	4.46E-06
ENSG00000187134	AKR1C1	8.56E-08	3644.441241	-2.852032849	0.558173282	-5.109583248	3.23E-07	4.46E-06
ENSG00000156030	MIDEAS	0.06846067	14283.45079	-1.088526851	0.213158111	-5.106664005	3.28E-07	4.53E-06
ENSG00000137727	ARHGAP20	0.00065954	295.7211879	2.53221164	0.496071642	5.104528111	3.32E-07	4.58E-06
ENSG00000182916	TCEAL7	4.29E-09	750.4490108	4.033465471	0.790539831	5.102166028	3.36E-07	4.63E-06
ENSG00000197238	H4C11	6.62E-09	11709.46143	3.240716925	0.635251569	5.101470164	3.37E-07	4.64E-06
ENSG00000121774	KHDRBS1	0.037256705	8830.698656	1.249779972	0.245011768	5.100897745	3.38E-07	4.65E-06
ENSG00000276966	H4C5	0.00013025	42089.56761	2.281683882	0.447413432	5.099721462	3.40E-07	4.68E-06
ENSG00000105270	CLIP3	0.001622838	3033.886236	1.84363799	0.361678459	5.097450351	3.44E-07	4.73E-06
ENSG00000135314	KHDC1	0.021511547	163.135489	1.901218213	0.373006669	5.097008641	3.45E-07	4.74E-06
ENSG00000075673	ATP12A	1.62E-12	726.3886479	-5.444035562	1.068119759	-5.096840045	3.45E-07	4.74E-06
ENSG00000145284	SCD5	9.47E-05	3875.52075	-2.043585057	0.401070149	-5.095330735	3.48E-07	4.78E-06
ENSG00000122203	KIAA1191	0.005186812	7312.264337	-1.531969923	0.300724809	-5.09425853	3.50E-07	4.80E-06
ENSG00000163872	YEATS2	0.014314508	4220.768757	1.42955517	0.28085147	5.090075436	3.58E-07	4.90E-06
ENSG00000100823	APEX1	0.003176696	6616.611132	1.657083274	0.3256071	5.089211124	3.60E-07	4.92E-06
ENSG00000162989	KCNJ3	4.27E-10	1025.072564	-3.941576734	0.774626807	-5.088355705	3.61E-07	4.94E-06
ENSG00000135446	CDK4	0.008571072	4855.784985	1.513240221	0.297455574	5.087281433	3.63E-07	4.97E-06
ENSG00000167080	B4GALNT2	1.53E-10	883.4928813	-5.277452547	1.038722848	-5.080712876	3.76E-07	5.13E-06
ENSG00000152315	KCNK13	0.000167646	305.2289635	-2.719967496	0.535383199	-5.080412497	3.77E-07	5.14E-06
ENSG00000151208	DLG5	0.007363563	14531.39945	1.585980253	0.312190688	5.08016515	3.77E-07	5.14E-06
ENSG00000181350	LRRC75A	0.017703574	334.333044	1.858651135	0.366041935	5.077700004	3.82E-07	5.20E-06
ENSG00000111666	CHPT1	0.006235335	1564.032519	-1.697011814	0.334243913	-5.077165955	3.83E-07	5.22E-06
ENSG00000163545	NUAK2	1.64E-06	4169.660251	-2.525969325	0.497704997	-5.075234006	3.87E-07	5.26E-06
ENSG00000189077	TMEM120A	0.019611319	942.2295745	-1.538475967	0.303163759	-5.074735755	3.88E-07	5.27E-06
ENSG00000249353	NPM1P27	0.007993125	11491.67715	1.562719562	0.307953644	5.07452857	3.88E-07	5.28E-06
ENSG00000161091	MFSD12	1.49E-06	9580.179052	-2.608737141	0.514257452	-5.072823215	3.92E-07	5.32E-06
ENSG00000206190	ATP10A	0.000976943	923.5745372	-2.120035368	0.417958505	-5.072358487	3.93E-07	5.33E-06
ENSG00000163864	NMNAT3	5.80E-07	1252.514991	-3.218085673	0.634560587	-5.071360782	3.95E-07	5.36E-06
ENSG00000197077	KIAA1671	0.025234326	11201.1493	-1.27027301	0.25053359	-5.070270253	3.97E-07	5.38E-06
ENSG00000158164	TMSB15A	4.42E-11	275.4868421	5.151841146	1.016178205	5.06982055	3.98E-07	5.39E-06
ENSG00000110195	FOLR1	1.36E-10	1838.389624	-3.841269175	0.757729023	-5.069449711	3.99E-07	5.40E-06
ENSG00000164318	EGFLAM	8.49E-08	1282.82564	3.715801158	0.733178365	5.068072566	4.02E-07	5.44E-06
ENSG00000108468	CBX1	0.001615598	8471.838029	1.780593458	0.351443776	5.066510154	4.05E-07	5.47E-06
ENSG00000133313	CNDP2	0.002277836	21348.33998	-1.743388376	0.344174787	-5.065415725	4.08E-07	5.50E-06
ENSG00000151327	FAM177A1	0.003173334	2541.504316	-1.679864365	0.331639066	-5.065339218	4.08E-07	5.50E-06
ENSG00000274750	H3C6	1.14E-09	1664.767507	3.771849416	0.744644798	5.065300164	4.08E-07	5.50E-06
ENSG00000155269	GPR78	1.12E-05	313.4238892	3.272143471	0.646026656	5.065028571	4.08E-07	5.50E-06
ENSG00000187605	TET3	0.021159986	7322.416998	1.357003617	0.267974629	5.063925723	4.11E-07	5.53E-06
ENSG00000166845	C18orf54	0.019459441	341.3546345	1.789915922	0.353551547	5.062673146	4.13E-07	5.56E-06
ENSG00000203760	CENPW	1.47E-07	273.7371482	4.1171542	0.81353419	5.060825039	4.17E-07	5.61E-06
ENSG00000148229	POLE3	0.06452724	1982.983942	1.231191592	0.243405159	5.058198421	4.23E-07	5.69E-06
ENSG00000187607	ZNF286A	0.004212038	1973.818159	1.781812369	0.352509439	5.054651514	4.31E-07	5.79E-06
ENSG00000106772	PRUNE2	5.11E-07	3757.417913	-2.715335094	0.537233786	-5.054289521	4.32E-07	5.80E-06
ENSG00000168916	ZNF608	0.00158687	6506.61633	1.74233932	0.34493983	5.051139842	4.39E-07	5.89E-06
ENSG00000170439	METTL7B	8.80E-05	875.0919917	-2.513638801	0.498061037	-5.046848907	4.49E-07	6.02E-06
ENSG00000158006	PAFAH2	0.028926734	1530.489555	-1.36632288	0.270814262	-5.045239751	4.53E-07	6.07E-06
ENSG00000162367	TAL1	0.014959871	402.4790121	-1.808049296	0.358520136	-5.043089955	4.58E-07	6.13E-06
ENSG00000134042	MRO	2.99E-07	1183.726695	-3.260070849	0.646765036	-5.040579916	4.64E-07	6.20E-06
ENSG00000132199	ENOSF1	0.0386403	7388.340047	-1.174271496	0.233021431	-5.039328318	4.67E-07	6.24E-06
ENSG00000011347	SYT7	4.05E-05	1467.38799	-2.419012797	0.480334967	-5.036095563	4.75E-07	6.34E-06
ENSG00000184227	ACOT1	0.000251939	1189.842592	-2.218311644	0.441364894	-5.026026474	5.01E-07	6.67E-06
ENSG00000253731	PCDHGA6	0.000526292	1520.893724	2.134336132	0.424746174	5.024968466	5.04E-07	6.70E-06
ENSG00000109881	CCDC34	0.006418747	892.2209672	1.861754977	0.370518565	5.024727922	5.04E-07	6.71E-06
ENSG00000010810	FYN	0.000548176	6795.396269	1.907150905	0.3797879	5.021621026	5.12E-07	6.81E-06
ENSG00000087586	AURKA	0.000556044	333.9890456	2.527726992	0.503391291	5.021395958	5.13E-07	6.81E-06
ENSG00000026559	KCNG1	4.39E-10	1063.480041	4.042941657	0.805725331	5.017766606	5.23E-07	6.94E-06
ENSG00000138744	NAAA	0.002288076	896.01409	-1.968842284	0.392432667	-5.017019353	5.25E-07	6.96E-06
ENSG00000185818	NAT8L	1.11E-08	7868.852989	-3.047137041	0.607464587	-5.016155848	5.27E-07	6.99E-06
ENSG00000145882	PCYOX1L	0.077667953	888.9505463	1.303227086	0.259858661	5.015138158	5.30E-07	7.02E-06
ENSG00000143590	EFNA3	0.000255129	233.7596644	2.814535954	0.561333232	5.014019824	5.33E-07	7.06E-06
ENSG00000148948	LRRC4C	0.000478439	508.4134869	2.57793404	0.514479882	5.010757721	5.42E-07	7.17E-06
ENSG00000033627	ATP6V0A1	0.048163734	6692.678415	-1.110268451	0.221603467	-5.010158309	5.44E-07	7.19E-06
ENSG00000117643	MAN1C1	0.001878533	3770.363852	-1.696660111	0.338662951	-5.009878134	5.45E-07	7.20E-06
ENSG00000153044	CENPH	0.000690813	287.8306573	2.556983916	0.51068189	5.006999401	5.53E-07	7.30E-06
ENSG00000112742	TTK	2.93E-08	198.2413056	4.52856642	0.904903456	5.004474662	5.60E-07	7.39E-06
ENSG00000127666	TICAM1	0.000108934	1224.050683	-2.335782096	0.466859267	-5.003182465	5.64E-07	7.43E-06
ENSG00000106633	GCK	4.76E-07	261.151534	3.804404897	0.760420348	5.003028793	5.64E-07	7.43E-06
ENSG00000115756	HPCAL1	0.051757243	1936.267528	-1.222523082	0.244389526	-5.00235465	5.66E-07	7.45E-06
ENSG00000163701	IL17RE	3.31E-06	931.6706548	-2.984640895	0.597042324	-4.999044075	5.76E-07	7.58E-06
ENSG00000205213	LGR4	1.94E-05	15142.68308	-2.313221281	0.462859186	-4.997678238	5.80E-07	7.62E-06
ENSG00000120278	PLEKHG1	0.001404332	5340.490095	1.765512576	0.353275221	4.997555646	5.81E-07	7.63E-06
ENSG00000168679	SLC16A4	1.78E-10	3235.289819	-3.650226326	0.730629979	-4.995998567	5.85E-07	7.67E-06
ENSG00000175928	LRRN1	2.85E-07	1263.486808	3.256899175	0.652472344	4.991627931	5.99E-07	7.83E-06
ENSG00000183723	CMTM4	0.007127891	7562.736733	-1.474973281	0.295528596	-4.990966366	6.01E-07	7.85E-06
ENSG00000170779	CDCA4	0.000162159	1294.741444	2.365254315	0.474096305	4.988974374	6.07E-07	7.92E-06
ENSG00000034152	MAP2K3	0.002053122	3815.884108	-1.698977806	0.340617728	-4.987931233	6.10E-07	7.96E-06
ENSG00000102048	ASB9	0.000523462	364.6756962	-2.586535191	0.518612507	-4.987413831	6.12E-07	7.97E-06
ENSG00000198355	PIM3	7.94E-07	11486.64344	-2.689569653	0.539514903	-4.98516285	6.19E-07	8.06E-06
ENSG00000126215	XRCC3	0.000828452	777.2982355	2.255685523	0.452667098	4.983100238	6.26E-07	8.14E-06
ENSG00000155657	TTN	8.62E-17	17402.24651	4.934378709	0.990255526	4.982934785	6.26E-07	8.14E-06
ENSG00000056736	IL17RB	1.29E-07	1269.895276	-3.348877853	0.672226474	-4.981770255	6.30E-07	8.18E-06
ENSG00000136305	CIDEB	0.00011813	830.7959199	-2.458845707	0.493615464	-4.981297966	6.32E-07	8.20E-06
ENSG00000075426	FOSL2	0.001079237	48471.25176	-1.90723769	0.382956878	-4.980293606	6.35E-07	8.24E-06
ENSG00000182667	NTM	1.48E-05	1273.563893	2.744986064	0.551282524	4.979272772	6.38E-07	8.28E-06
ENSG00000183044	ABAT	7.82E-06	9059.35171	-2.407987478	0.483647758	-4.978804176	6.40E-07	8.29E-06
ENSG00000003402	CFLAR	0.018350578	19240.22748	-1.364474979	0.274082238	-4.978341502	6.41E-07	8.31E-06
ENSG00000144063	MALL	0.042545069	379.6846252	-1.550649581	0.311577303	-4.976773228	6.47E-07	8.37E-06
ENSG00000111490	TBC1D30	0.003955403	845.250035	-1.864919552	0.374804742	-4.975709603	6.50E-07	8.40E-06
ENSG00000077264	PAK3	0.000677178	370.993946	2.521217186	0.507056203	4.972263766	6.62E-07	8.53E-06
ENSG00000137804	NUSAP1	2.88E-08	983.5832709	3.630287385	0.730106062	4.972273993	6.62E-07	8.53E-06
ENSG00000009950	MLXIPL	7.05E-07	2919.376156	-2.706708921	0.544864004	-4.96767799	6.78E-07	8.71E-06
ENSG00000072571	HMMR	7.12E-08	282.334012	4.14206785	0.833822219	4.96756713	6.78E-07	8.71E-06
ENSG00000006756	ARSD	0.008051753	8932.374947	-1.449693905	0.291928978	-4.965912998	6.84E-07	8.78E-06
ENSG00000189184	PCDH18	5.72E-10	5436.265396	3.561297427	0.717267575	4.965089114	6.87E-07	8.81E-06
ENSG00000089486	CDIP1	0.023297152	2770.848714	-1.295605227	0.261110263	-4.961908481	6.98E-07	8.95E-06
ENSG00000106993	CDC37L1	0.065963304	1564.213089	-1.175513208	0.236975294	-4.960488444	7.03E-07	9.00E-06
ENSG00000223797	ENTPD3-AS1	0.022473919	249.0401114	-1.803977699	0.363669806	-4.960482472	7.03E-07	9.00E-06
ENSG00000099812	MISP	1.24E-08	1746.369183	-3.306814177	0.666730889	-4.959743478	7.06E-07	9.02E-06
ENSG00000198944	SOWAHA	3.40E-06	949.8512978	-2.887154221	0.582108397	-4.959822325	7.06E-07	9.02E-06
ENSG00000075035	WSCD2	7.09E-15	2160.775333	4.666846928	0.941067696	4.959098	7.08E-07	9.05E-06
ENSG00000035115	SH3YL1	0.001636322	5467.06524	-1.719793128	0.347281764	-4.952155013	7.34E-07	9.35E-06
ENSG00000173926	MARCHF3	0.000123686	323.663287	2.807334457	0.566946349	4.951675691	7.36E-07	9.37E-06
ENSG00000170835	CEL	0.00507682	356.769482	-2.073137402	0.418773614	-4.950496715	7.40E-07	9.42E-06
ENSG00000106462	EZH2	4.06E-07	1308.673443	3.245010117	0.655621125	4.949520373	7.44E-07	9.45E-06
ENSG00000125746	EML2	0.007384095	1760.050433	-1.605839649	0.32444283	-4.949530395	7.44E-07	9.45E-06
ENSG00000140961	OSGIN1	0.000429422	393.9604132	-2.552603772	0.515797246	-4.948851103	7.47E-07	9.47E-06
ENSG00000124171	PARD6B	0.000276219	5267.952296	-1.966749847	0.397427983	-4.948694941	7.47E-07	9.47E-06
ENSG00000126821	SGPP1	0.000270969	2930.909579	-2.033459853	0.411558265	-4.94087964	7.78E-07	9.83E-06
ENSG00000138336	TET1	1.18E-06	2094.276661	2.895235179	0.586065158	4.940125069	7.81E-07	9.87E-06
ENSG00000068745	IP6K2	0.077760848	3765.211468	1.091244059	0.220935249	4.939203071	7.84E-07	9.91E-06
ENSG00000110090	CPT1A	2.06E-06	24064.34051	-2.701993368	0.547193549	-4.937911596	7.90E-07	9.96E-06
ENSG00000163121	NEURL3	1.11E-09	515.7810467	-4.265872188	0.864033622	-4.937159942	7.93E-07	9.99E-06
ENSG00000104687	GSR	0.133848899	6308.796977	-0.890677411	0.180456871	-4.935680236	7.99E-07	1.01E-05
ENSG00000101306	MYLK2	1.18E-05	236.5977298	3.344354134	0.677823113	4.933962961	8.06E-07	1.01E-05
ENSG00000188266	HYKK	0.037687407	302.1977327	-1.626779225	0.329840738	-4.932014265	8.14E-07	1.02E-05
ENSG00000137507	LRRC32	0.001920683	6603.974609	-1.688015624	0.342264424	-4.931905003	8.14E-07	1.02E-05
ENSG00000166145	SPINT1	0.002306503	7395.636416	-1.623259968	0.329150497	-4.931664953	8.15E-07	1.02E-05
ENSG00000162065	TBC1D24	0.003285293	3835.82093	-1.585471626	0.321515436	-4.931245738	8.17E-07	1.03E-05
ENSG00000162413	KLHL21	0.000172359	7080.67068	-1.997240404	0.405030748	-4.931083414	8.18E-07	1.03E-05
ENSG00000173013	CCDC96	0.000494916	383.3106237	-2.460852003	0.499128269	-4.930299793	8.21E-07	1.03E-05
ENSG00000073150	PANX2	0.000335415	317.5060025	-2.628666558	0.533609534	-4.926198634	8.38E-07	1.05E-05
ENSG00000136371	MTHFS	0.012379545	1134.205191	-1.589265126	0.322613114	-4.926226058	8.38E-07	1.05E-05
ENSG00000176490	DIRAS1	0.00232672	657.5311816	-2.012048986	0.408586181	-4.924417613	8.46E-07	1.06E-05
ENSG00000173221	GLRX	7.31E-06	1501.752343	-2.726900005	0.554249141	-4.919989595	8.65E-07	1.08E-05
ENSG00000099284	MACROH2A2	8.57E-06	5155.674219	2.40100294	0.488047899	4.919605117	8.67E-07	1.08E-05
ENSG00000185070	FLRT2	3.47E-07	4804.97389	2.72448189	0.554163516	4.916386247	8.82E-07	1.10E-05
ENSG00000204304	PBX2	0.035861321	7583.563052	1.251882177	0.254680851	4.915493936	8.86E-07	1.10E-05
ENSG00000151835	SACS	2.35E-06	3322.608725	2.617237737	0.532761919	4.912584105	8.99E-07	1.12E-05
ENSG00000136868	SLC31A1	0.007341448	3925.076707	-1.489613803	0.303343623	-4.91064816	9.08E-07	1.13E-05
ENSG00000130707	ASS1	4.75E-10	26571.21743	-3.573761568	0.727882182	-4.909807737	9.12E-07	1.13E-05
ENSG00000139344	AMDHD1	0.000143881	277.1992	-3.089526742	0.62939407	-4.908731885	9.17E-07	1.14E-05
ENSG00000111249	CUX2	2.06E-10	1222.267351	4.158219722	0.847454819	4.906715533	9.26E-07	1.15E-05
ENSG00000174482	LINGO2	8.75E-05	214.7217919	3.033742916	0.618325626	4.906383929	9.28E-07	1.15E-05
ENSG00000132970	WASF3	2.90E-06	5387.4176	2.706904877	0.55221484	4.901905342	9.49E-07	1.17E-05
ENSG00000146197	SCUBE3	8.66E-05	2390.785063	2.247540433	0.458661688	4.90021402	9.57E-07	1.18E-05
ENSG00000158457	TSPAN33	4.20E-06	3952.374277	-2.464144085	0.502992402	-4.898968805	9.63E-07	1.19E-05
ENSG00000156381	ANKRD9	0.000393178	4065.91988	-1.893593052	0.386762525	-4.896009644	9.78E-07	1.21E-05
ENSG00000112182	BACH2	3.73E-06	3151.190629	2.597574101	0.531324392	4.888866652	1.01E-06	1.25E-05
ENSG00000147813	NAPRT	1.05E-05	3671.044027	-2.414262442	0.49382823	-4.888870861	1.01E-06	1.25E-05
ENSG00000177455	CD19	6.25E-11	1240.70566	4.390785495	0.898277783	4.88800411	1.02E-06	1.25E-05
ENSG00000198832	SELENOM	0.000224314	1023.99697	-2.448569925	0.50102691	-4.887102624	1.02E-06	1.26E-05
ENSG00000139531	SUOX	0.062436102	3278.054956	-1.080325597	0.221089203	-4.886378808	1.03E-06	1.26E-05
ENSG00000130312	MRPL34	0.113445859	952.5598701	-1.102313872	0.225623117	-4.885642423	1.03E-06	1.26E-05
ENSG00000117595	IRF6	7.89E-08	1711.127425	-3.189151313	0.653323314	-4.881428908	1.05E-06	1.29E-05
ENSG00000036672	USP2	3.95E-09	2737.821256	-3.229138858	0.661565123	-4.881059697	1.06E-06	1.29E-05
ENSG00000163430	FSTL1	0.004371751	21862.54285	1.722059528	0.352889839	4.879878475	1.06E-06	1.30E-05
ENSG00000133884	DPF2	0.1177423	3291.444294	1.027354392	0.210624847	4.877650502	1.07E-06	1.31E-05
ENSG00000163535	SGO2	0.02230374	227.0975748	1.832089528	0.375856089	4.874444183	1.09E-06	1.33E-05
ENSG00000143702	CEP170	1.26E-05	4867.088867	2.358553511	0.484682205	4.866185486	1.14E-06	1.39E-05
ENSG00000162881	OXER1	8.44E-05	735.6545968	-2.604528146	0.535605446	-4.862773833	1.16E-06	1.41E-05
ENSG00000109667	SLC2A9	0.000351511	1028.810996	-2.25515622	0.463804018	-4.862304188	1.16E-06	1.41E-05
ENSG00000143995	MEIS1	2.98E-08	5678.721522	3.132250709	0.644250987	4.86184852	1.16E-06	1.42E-05
ENSG00000027075	PRKCH	0.01117038	2232.357355	-1.486252069	0.305764259	-4.86077762	1.17E-06	1.42E-05
ENSG00000169218	RSPO1	1.24E-05	500.8593018	3.378346335	0.695231456	4.859311678	1.18E-06	1.43E-05
ENSG00000128274	A4GALT	9.80E-08	3927.886683	-2.812141679	0.578739682	-4.859078727	1.18E-06	1.43E-05
ENSG00000164825	DEFB1	5.36E-17	883.4387771	-6.910581859	1.424316911	-4.85185692	1.22E-06	1.48E-05
ENSG00000005073	HOXA11	2.29E-08	1886.84648	3.371774529	0.69522507	4.849903541	1.24E-06	1.50E-05
ENSG00000248449	PCDHGB8P	0.035923176	312.9487979	1.66529785	0.343369422	4.849872304	1.24E-06	1.50E-05
ENSG00000120327	PCDHB14	0.020723772	975.0945676	1.62336856	0.334982802	4.846125086	1.26E-06	1.52E-05
ENSG00000250479	CHCHD10	0.000251918	781.6464125	-2.41225729	0.497794604	-4.84588879	1.26E-06	1.52E-05
ENSG00000088899	LZTS3	8.07E-07	11871.59012	-2.668050804	0.550657722	-4.845207284	1.26E-06	1.53E-05
ENSG00000113248	PCDHB15	0.001181408	900.1576775	2.152994178	0.444405654	4.844659739	1.27E-06	1.53E-05
ENSG00000144792	ZNF660	0.003216668	830.5537716	2.026775863	0.418450898	4.843521362	1.28E-06	1.54E-05
ENSG00000198203	SULT1C2	8.86E-07	6440.859691	-2.608288606	0.538818643	-4.840754198	1.29E-06	1.56E-05
ENSG00000100033	PRODH	3.29E-11	1679.945597	-4.112837902	0.84988848	-4.83926774	1.30E-06	1.57E-05
ENSG00000169604	ANTXR1	0.001302156	8952.835163	1.839454426	0.380181111	4.838363544	1.31E-06	1.58E-05
ENSG00000143341	HMCN1	1.57E-08	21156.99539	4.061317899	0.83973051	4.8364539	1.32E-06	1.59E-05
ENSG00000164087	POC1A	0.004012713	312.4223243	2.206902797	0.456310222	4.836408849	1.32E-06	1.59E-05
ENSG00000129214	SHBG	0.000172805	289.4076881	-2.912929993	0.602483286	-4.834872704	1.33E-06	1.60E-05
ENSG00000196405	EVL	0.026942063	7915.568862	1.321931507	0.27358151	4.831947545	1.35E-06	1.62E-05
ENSG00000160867	FGFR4	6.29E-10	8606.317602	-3.267570071	0.676393222	-4.830873469	1.36E-06	1.63E-05
ENSG00000164849	GPR146	0.024382708	264.1539556	-1.701626841	0.352363721	-4.829177185	1.37E-06	1.64E-05
ENSG00000187987	ZSCAN23	0.011120522	409.4464843	1.916762488	0.397019712	4.827877385	1.38E-06	1.65E-05
ENSG00000111181	SLC6A12	4.57E-07	2111.919728	-2.867095402	0.594129705	-4.825706198	1.40E-06	1.67E-05
ENSG00000221817	PPP3CB-AS1	0.017798322	278.8631029	-1.806490182	0.37436827	-4.825436146	1.40E-06	1.67E-05
ENSG00000149575	SCN2B	2.68E-06	916.5795148	3.026772481	0.627482617	4.823675426	1.41E-06	1.68E-05
ENSG00000131080	EDA2R	5.68E-07	211.0886871	4.179249403	0.866496463	4.823158066	1.41E-06	1.69E-05
ENSG00000189046	ALKBH2	0.079763236	856.818676	1.292886878	0.268181506	4.820939725	1.43E-06	1.70E-05
ENSG00000126005	MMP24OS	0.004242963	1985.200293	-1.701996511	0.353050549	-4.820829526	1.43E-06	1.70E-05
ENSG00000174498	IGDCC3	2.94E-10	1122.991305	4.082231403	0.84712843	4.818904972	1.44E-06	1.72E-05
ENSG00000169291	SHE	0.003949997	1592.702315	-1.765594018	0.366498125	-4.817470808	1.45E-06	1.73E-05
ENSG00000115602	IL1RL1	1.85E-12	655.9116043	-5.121049566	1.063353974	-4.815940592	1.47E-06	1.74E-05
ENSG00000242110	AMACR	5.31E-05	2970.506968	-2.207158914	0.458560623	-4.813232543	1.49E-06	1.76E-05
ENSG00000156284	CLDN8	1.83E-16	1387.119944	-5.540080921	1.151206678	-4.812412079	1.49E-06	1.77E-05
ENSG00000172840	PDP2	0.000561365	3010.55962	-1.926613339	0.400388796	-4.811856272	1.50E-06	1.77E-05
ENSG00000100027	YPEL1	0.024615198	1611.551628	1.487763762	0.309197946	4.811687083	1.50E-06	1.77E-05
ENSG00000121988	ZRANB3	0.00445035	630.5963216	1.98584013	0.412762246	4.811099248	1.50E-06	1.78E-05
ENSG00000151014	NOCT	0.005183509	417.7168342	-2.034708617	0.42293893	-4.810880418	1.50E-06	1.78E-05
ENSG00000113492	AGXT2	2.68E-21	2791.286913	-5.812992953	1.208859027	-4.808660747	1.52E-06	1.80E-05
ENSG00000128918	ALDH1A2	1.28E-06	7145.241517	2.704921547	0.562521063	4.808569358	1.52E-06	1.80E-05
ENSG00000106571	GLI3	0.01148281	1686.322483	1.60913839	0.334909342	4.804698427	1.55E-06	1.83E-05
ENSG00000108106	UBE2S	0.000403246	1300.553154	2.234086601	0.465029752	4.804179925	1.55E-06	1.83E-05
ENSG00000125246	CLYBL	0.002151107	864.5204169	-1.994283318	0.4153058	-4.801963563	1.57E-06	1.85E-05
ENSG00000180616	SSTR2	1.89E-05	1307.232112	-2.622987267	0.546501608	-4.799596613	1.59E-06	1.87E-05
ENSG00000130762	ARHGEF16	2.99E-05	2527.603534	-2.357900338	0.491290049	-4.799405859	1.59E-06	1.87E-05
ENSG00000163328	GPR155	3.90E-06	2964.842777	-2.714954868	0.565737993	-4.79896154	1.59E-06	1.88E-05
ENSG00000181192	DHTKD1	0.000855746	7016.321453	-1.817748517	0.379243111	-4.79309568	1.64E-06	1.93E-05
ENSG00000178814	OPLAH	1.45E-06	5007.200011	-2.52355631	0.526571298	-4.792430425	1.65E-06	1.93E-05
ENSG00000261377	PDCD6IPP2	0.003132259	345.3914101	2.209002586	0.461221752	4.789458816	1.67E-06	1.96E-05
ENSG00000134107	BHLHE40	0.000240837	17231.62151	-2.050560992	0.428594843	-4.784380926	1.72E-06	2.01E-05
ENSG00000148429	USP6NL	0.06945975	2600.436418	1.149422954	0.240239555	4.784486688	1.71E-06	2.01E-05
ENSG00000170624	SGCD	5.35E-09	1371.818185	3.666456103	0.766353208	4.78429015	1.72E-06	2.01E-05
ENSG00000135622	SEMA4F	0.112777592	795.105249	1.202366075	0.251357738	4.78348542	1.72E-06	2.02E-05
ENSG00000125931	CITED1	1.49E-09	716.9844914	4.42641533	0.925438895	4.783044408	1.73E-06	2.02E-05
ENSG00000160216	AGPAT3	0.000547178	14410.38898	-1.927947371	0.4032473	-4.781054629	1.74E-06	2.04E-05
ENSG00000176399	DMRTA1	6.42E-07	178.5893419	-4.497074995	0.940658437	-4.780773573	1.75E-06	2.04E-05
ENSG00000103710	RASL12	0.023553542	591.081398	1.700153392	0.355806893	4.778303693	1.77E-06	2.06E-05
ENSG00000198755	RPL10A	0.006647865	17873.35885	1.60891799	0.336835438	4.776569832	1.78E-06	2.07E-05
ENSG00000134769	DTNA	2.06E-06	1606.439187	2.868654078	0.600695843	4.775551737	1.79E-06	2.08E-05
ENSG00000139626	ITGB7	0.004449159	466.6051674	-1.994427175	0.417662299	-4.775214762	1.80E-06	2.09E-05
ENSG00000112029	FBXO5	0.007472558	339.1833286	2.025182753	0.424526968	4.770445474	1.84E-06	2.13E-05
ENSG00000069966	GNB5	0.004616362	4166.286286	-1.532912522	0.32137049	-4.769923101	1.84E-06	2.14E-05
ENSG00000154133	ROBO4	0.004118796	2878.890635	-1.643039129	0.344699235	-4.766587686	1.87E-06	2.17E-05
ENSG00000135447	PPP1R1A	2.28E-06	2407.768861	-2.756550008	0.578354171	-4.766197163	1.88E-06	2.18E-05
ENSG00000188322	SBK1	7.94E-08	3648.261386	2.962789709	0.621642381	4.766067757	1.88E-06	2.18E-05
ENSG00000137331	IER3	0.000202793	3729.510125	-2.026365517	0.425300904	-4.76454552	1.89E-06	2.19E-05
ENSG00000037965	HOXC8	2.39E-06	697.5073704	3.102178284	0.651138384	4.76423808	1.90E-06	2.19E-05
ENSG00000164659	ELAPOR2	0.00064279	1154.471547	2.216751332	0.465312852	4.76400194	1.90E-06	2.19E-05
ENSG00000125354	SEPTIN6	0.002332384	3828.8031	1.746735246	0.366852466	4.761410674	1.92E-06	2.22E-05
ENSG00000169169	CPT1C	0.001388185	501.0105866	2.335547934	0.491248532	4.75431026	1.99E-06	2.30E-05
ENSG00000123219	CENPK	0.000152433	167.6490386	2.940192972	0.619197105	4.748395861	2.05E-06	2.36E-05
ENSG00000173641	HSPB7	1.27E-06	405.2559021	-3.343604725	0.704236599	-4.747842885	2.06E-06	2.37E-05
ENSG00000169925	BRD3	0.012815929	10761.03736	1.47291412	0.310539145	4.743086806	2.10E-06	2.42E-05
ENSG00000240859	LINC03014	0.027432341	246.3440842	-1.692130951	0.35679978	-4.742522403	2.11E-06	2.43E-05
ENSG00000176978	DPP7	0.000230397	3646.133272	-1.99012079	0.419812258	-4.74050186	2.13E-06	2.45E-05
ENSG00000163644	PPM1K	0.000899087	6440.15924	-1.842572814	0.388792522	-4.739218755	2.15E-06	2.46E-05
ENSG00000147003	CLTRN	4.37E-13	1587.535372	-4.621563703	0.975251575	-4.738842591	2.15E-06	2.46E-05
ENSG00000168268	NT5DC2	0.000131493	2391.531038	2.220366917	0.468550996	4.738794572	2.15E-06	2.46E-05
ENSG00000130988	RGN	1.22E-07	1162.187456	-3.2565355	0.687533094	-4.736550905	2.17E-06	2.49E-05
ENSG00000273802	H2BC8	1.68E-06	1914.33693	2.901686098	0.612638714	4.736374033	2.18E-06	2.49E-05
ENSG00000113273	ARSB	0.008077614	3085.333886	-1.493051108	0.315284889	-4.7355619	2.18E-06	2.50E-05
ENSG00000093217	XYLB	0.001020944	1051.261317	-2.059293097	0.435127248	-4.732622713	2.22E-06	2.53E-05
ENSG00000129219	PLD2	0.139129595	1727.931953	1.050515845	0.221976307	4.732558447	2.22E-06	2.53E-05
ENSG00000197448	GSTK1	0.026400085	5275.383306	-1.245389501	0.263197015	-4.731776693	2.23E-06	2.54E-05
ENSG00000269713	NBPF9	0.143540984	3939.873222	0.944628858	0.199677311	4.730777133	2.24E-06	2.55E-05
ENSG00000111653	ING4	0.015470909	2335.382122	1.499042016	0.316983352	4.729087521	2.26E-06	2.57E-05
ENSG00000204969	PCDHA2	4.06E-06	258.0425926	3.544090462	0.749744689	4.727063113	2.28E-06	2.59E-05
ENSG00000165475	CRYL1	8.49E-08	5500.023562	-2.864767019	0.606057903	-4.726886662	2.28E-06	2.60E-05
ENSG00000079616	KIF22	0.002438297	3506.855987	1.737941731	0.367717274	4.726298857	2.29E-06	2.60E-05
ENSG00000161800	RACGAP1	5.12E-05	1368.464011	2.490426197	0.527242609	4.723491909	2.32E-06	2.64E-05
ENSG00000103316	CRYM	2.44E-07	1075.814597	-3.315339257	0.70196971	-4.722909281	2.32E-06	2.64E-05
ENSG00000157992	KRTCAP3	0.059916819	195.7385659	-1.479175677	0.313225093	-4.722404782	2.33E-06	2.65E-05
ENSG00000136231	IGF2BP3	1.64E-13	1794.784155	4.514186115	0.956440373	4.719777877	2.36E-06	2.68E-05
ENSG00000105997	HOXA3	0.002928311	1380.406772	1.913632047	0.405800778	4.715693394	2.41E-06	2.73E-05
ENSG00000125148	MT2A	0.000201373	1596.122803	-2.235475472	0.474051458	-4.715681044	2.41E-06	2.73E-05
ENSG00000204219	TCEA3	7.17E-06	4166.621444	-2.336159821	0.495761783	-4.712262826	2.45E-06	2.77E-05
ENSG00000184307	ZDHHC23	0.008368348	719.1638893	-1.828336112	0.388012349	-4.712056509	2.45E-06	2.77E-05
ENSG00000174749	FAM241A	0.001737507	535.057446	-2.186034436	0.463990912	-4.71137339	2.46E-06	2.78E-05
ENSG00000137266	SLC22A23	0.018095151	2083.750358	-1.432955677	0.304167216	-4.711078654	2.46E-06	2.78E-05
ENSG00000117906	RCN2	0.010053935	2638.471765	1.552171357	0.329526924	4.71030209	2.47E-06	2.79E-05
ENSG00000175711	B3GNTL1	0.054886156	359.4025602	1.507597534	0.320240216	4.70770834	2.51E-06	2.82E-05
ENSG00000148175	STOM	6.13E-05	5433.882756	-2.112889825	0.448917428	-4.706633543	2.52E-06	2.84E-05
ENSG00000134419	RPS15A	0.00376163	9254.879722	1.645211459	0.349788404	4.703447681	2.56E-06	2.88E-05
ENSG00000171234	UGT2B7	1.03E-22	7803.619788	-5.818981424	1.237263162	-4.703107314	2.56E-06	2.88E-05
ENSG00000244649	LINC02086	3.36E-07	813.7024	3.534035654	0.751552552	4.702313426	2.57E-06	2.89E-05
ENSG00000112183	RBM24	7.28E-06	437.8834549	3.334939478	0.709257015	4.70201832	2.58E-06	2.90E-05
ENSG00000167797	CDK2AP2	0.04908043	1389.827816	-1.254966098	0.266956464	-4.701014095	2.59E-06	2.91E-05
ENSG00000143839	REN	4.08E-08	631.7129149	-3.986743519	0.848083061	-4.700888043	2.59E-06	2.91E-05
ENSG00000102384	CENPI	5.94E-06	131.2381188	3.676315013	0.782284555	4.699460051	2.61E-06	2.93E-05
ENSG00000198720	ANKRD13B	0.000117053	1095.892719	2.468205758	0.525348113	4.698229032	2.62E-06	2.94E-05
ENSG00000101350	KIF3B	0.083177973	6973.097846	-1.007145709	0.214377928	-4.697991609	2.63E-06	2.94E-05
ENSG00000187097	ENTPD5	7.08E-06	3590.899039	-2.435165036	0.518373462	-4.697703899	2.63E-06	2.95E-05
ENSG00000183048	SLC25A10	5.94E-06	3114.739204	-2.495678063	0.531340988	-4.696942493	2.64E-06	2.95E-05
ENSG00000089157	RPLP0	0.014613774	26037.49397	1.517920054	0.323224122	4.696184324	2.65E-06	2.96E-05
ENSG00000095713	CRTAC1	2.16E-15	22121.63485	5.03308838	1.072165122	4.694322058	2.67E-06	2.99E-05
ENSG00000100075	SLC25A1	0.007120787	3930.370588	-1.482026146	0.315743811	-4.693761505	2.68E-06	3.00E-05
ENSG00000023228	NDUFS1	0.006633818	20310.5665	-1.562421034	0.332920115	-4.693080899	2.69E-06	3.00E-05
ENSG00000107957	SH3PXD2A	0.003152074	13586.8597	1.731006347	0.368839579	4.693114421	2.69E-06	3.00E-05
ENSG00000168487	BMP1	0.003745933	4205.844073	1.665288577	0.35485494	4.692871337	2.69E-06	3.00E-05
ENSG00000186197	EDARADD	0.002510683	432.9636852	2.172320707	0.462991087	4.691927705	2.71E-06	3.02E-05
ENSG00000147526	TACC1	0.007837848	9258.826964	-1.473657956	0.314210679	-4.690031416	2.73E-06	3.04E-05
ENSG00000149554	CHEK1	0.000201192	778.2099484	2.461717408	0.524889536	4.689972348	2.73E-06	3.04E-05
ENSG00000095321	CRAT	0.003527458	3075.765281	-1.638440994	0.349374786	-4.689637207	2.74E-06	3.04E-05
ENSG00000121966	CXCR4	2.76E-06	1266.649316	2.885213414	0.615267172	4.689366743	2.74E-06	3.04E-05
ENSG00000072210	ALDH3A2	0.010875642	9425.169003	-1.44807759	0.309084932	-4.685047499	2.80E-06	3.11E-05
ENSG00000128683	GAD1	0.000100291	442.2553643	-2.76251881	0.589657504	-4.684954896	2.80E-06	3.11E-05
ENSG00000137960	GIPC2	1.12E-09	1406.33643	-3.787495583	0.808613688	-4.683937012	2.81E-06	3.12E-05
ENSG00000115183	TANC1	0.020404567	19555.46671	1.407048504	0.300814285	4.677465708	2.90E-06	3.22E-05
ENSG00000188176	SMTNL2	2.41E-07	2709.46491	-2.799995465	0.598739252	-4.67648556	2.92E-06	3.23E-05
ENSG00000135365	PHF21A	0.021878039	3361.853085	1.387933533	0.296822275	4.675974982	2.93E-06	3.24E-05
ENSG00000048052	HDAC9	0.011326953	905.1544333	1.730855983	0.370249986	4.674830648	2.94E-06	3.25E-05
ENSG00000200463	SNORD118	0.017468095	304.9144426	1.88578407	0.40347534	4.673852115	2.96E-06	3.27E-05
ENSG00000155380	SLC16A1	1.35E-06	3034.626389	2.65212143	0.567523029	4.67315209	2.97E-06	3.28E-05
ENSG00000132932	ATP8A2	1.23E-06	492.1297245	3.440868455	0.736461044	4.672166281	2.98E-06	3.29E-05
ENSG00000254470	AP5B1	6.46E-05	6193.794739	-2.101580428	0.449950544	-4.670692049	3.00E-06	3.31E-05
ENSG00000103942	HOMER2	0.002191115	4226.275863	1.719561526	0.368274667	4.669236524	3.02E-06	3.33E-05
ENSG00000151498	ACAD8	0.06015656	2196.38558	-1.146687103	0.245639475	-4.668171109	3.04E-06	3.35E-05
ENSG00000180155	LYNX1	9.05E-05	2635.925193	-2.203853617	0.472321987	-4.665998359	3.07E-06	3.38E-05
ENSG00000180758	GPR157	9.98E-05	1195.023695	-2.505475205	0.536973137	-4.665922803	3.07E-06	3.38E-05
ENSG00000123240	OPTN	0.002367303	5818.206788	-1.642623666	0.352159207	-4.664434816	3.09E-06	3.40E-05
ENSG00000070404	FSTL3	0.001566245	2153.439008	-1.825240213	0.391522547	-4.6619032	3.13E-06	3.44E-05
ENSG00000074047	GLI2	0.000822798	1256.143963	2.16578653	0.464632498	4.661289381	3.14E-06	3.44E-05
ENSG00000073578	SDHA	0.01014128	12846.47318	-1.447884996	0.310668902	-4.660540492	3.15E-06	3.45E-05
ENSG00000077312	SNRPA	0.019454255	1323.818634	1.547100756	0.331989043	4.660095839	3.16E-06	3.46E-05
ENSG00000114573	ATP6V1A	0.001832493	7431.210317	-1.692675842	0.363247126	-4.659846481	3.16E-06	3.46E-05
ENSG00000138795	LEF1	0.001082833	1110.190768	2.110905924	0.45302068	4.659623764	3.17E-06	3.46E-05
ENSG00000163159	VPS72	0.006331285	2586.721382	1.653541987	0.3549316	4.658762384	3.18E-06	3.48E-05
ENSG00000131471	AOC3	0.000139286	1871.822194	-2.199744171	0.472232876	-4.65817668	3.19E-06	3.48E-05
ENSG00000160685	ZBTB7B	8.66E-05	5025.024505	-2.061278914	0.44260157	-4.657188436	3.21E-06	3.50E-05
ENSG00000150281	CTF1	8.67E-05	605.8290539	-2.710270432	0.581977515	-4.657001966	3.21E-06	3.50E-05
ENSG00000179627	ZBTB42	0.000507657	1820.964314	-2.038694613	0.437938075	-4.655212072	3.24E-06	3.52E-05
ENSG00000176049	JAKMIP2	0.000227261	261.7172899	2.76327614	0.59384037	4.653230532	3.27E-06	3.55E-05
ENSG00000090097	PCBP4	0.000438038	3858.773554	1.985488695	0.426837241	4.65162948	3.29E-06	3.58E-05
ENSG00000116514	RNF19B	2.83E-05	5617.781783	-2.19478147	0.472127385	-4.648706132	3.34E-06	3.62E-05
ENSG00000198700	IPO9	0.004910842	6517.157055	1.606922234	0.345678803	4.648599283	3.34E-06	3.62E-05
ENSG00000146166	LGSN	9.84E-11	454.3356393	-4.676805196	1.006206669	-4.647956866	3.35E-06	3.63E-05
ENSG00000111328	CDK2AP1	0.027896466	2939.037254	1.356318712	0.291866056	4.647058762	3.37E-06	3.65E-05
ENSG00000135925	WNT10A	0.000441471	238.7649467	-2.642751465	0.568826004	-4.645975122	3.38E-06	3.66E-05
ENSG00000170545	SMAGP	0.022252249	355.6604371	-1.693078206	0.364706833	-4.642299107	3.45E-06	3.73E-05
ENSG00000006534	ALDH3B1	6.42E-06	2211.967564	-2.635197522	0.567874204	-4.64045999	3.48E-06	3.75E-05
ENSG00000091592	NLRP1	0.006126736	4489.522877	1.570515652	0.338635016	4.6377828	3.52E-06	3.80E-05
ENSG00000170961	HAS2	2.40E-10	1958.578536	4.402489665	0.949415479	4.637052759	3.53E-06	3.81E-05
ENSG00000162522	KIAA1522	0.016571857	6548.768018	-1.318233864	0.284406228	-4.635038669	3.57E-06	3.85E-05
ENSG00000064692	SNCAIP	3.87E-07	1110.953052	3.374551286	0.728390622	4.632886785	3.61E-06	3.88E-05
ENSG00000197019	SERTAD1	0.000772439	2827.385811	-1.844735684	0.398172788	-4.633002908	3.60E-06	3.88E-05
ENSG00000197375	SLC22A5	0.001402226	3967.197126	-1.71717804	0.370651265	-4.63286707	3.61E-06	3.88E-05
ENSG00000105642	KCNN1	2.36E-08	531.9792123	3.951822133	0.853044511	4.632609532	3.61E-06	3.88E-05
ENSG00000115884	SDC1	8.24E-05	9983.109677	-2.16740204	0.468010617	-4.631095877	3.64E-06	3.91E-05
ENSG00000106351	AGFG2	0.00278761	2511.510466	-1.698152402	0.366847338	-4.62904382	3.67E-06	3.94E-05
ENSG00000095203	EPB41L4B	0.003115663	456.005423	-2.084561863	0.450628524	-4.625898608	3.73E-06	4.00E-05
ENSG00000113205	PCDHB3	0.005631249	924.3163982	1.912475441	0.413598671	4.623988364	3.76E-06	4.04E-05
ENSG00000090565	RAB11FIP3	0.000468643	21239.35804	-2.01253303	0.435413593	-4.622118058	3.80E-06	4.07E-05
ENSG00000170558	CDH2	3.68E-05	5275.672709	2.222609974	0.480879401	4.621969601	3.80E-06	4.07E-05
ENSG00000103335	PIEZO1	1.27E-05	13523.03461	-2.390196269	0.517941185	-4.614802484	3.93E-06	4.21E-05
ENSG00000167740	CYB5D2	0.085419588	1916.373219	-1.089986174	0.236201079	-4.614653664	3.94E-06	4.21E-05
ENSG00000198736	MSRB1	0.005073514	1233.779543	-1.734751969	0.375929138	-4.614571723	3.94E-06	4.21E-05
ENSG00000013364	MVP	1.10E-05	16734.72311	-2.414464468	0.523296207	-4.613953692	3.95E-06	4.22E-05
ENSG00000116329	OPRD1	7.15E-09	349.0846724	4.381611229	0.949984522	4.612297492	3.98E-06	4.25E-05
ENSG00000197859	ADAMTSL2	9.13E-06	5009.123354	-2.319501596	0.503009596	-4.611247207	4.00E-06	4.27E-05
ENSG00000180592	SKIDA1	0.005519456	710.7612216	1.946373664	0.422209563	4.609970578	4.03E-06	4.29E-05
ENSG00000165644	COMTD1	0.000232081	514.349688	-2.539811027	0.551069046	-4.608879858	4.05E-06	4.31E-05
ENSG00000076003	MCM6	6.41E-06	2132.962939	2.693679892	0.585123719	4.603607419	4.15E-06	4.42E-05
ENSG00000180233	ZNRF2	0.001577878	2557.525802	-1.789263343	0.388706585	-4.603120737	4.16E-06	4.43E-05
ENSG00000002933	TMEM176A	4.11E-07	4633.888086	-2.620991632	0.569418207	-4.602929098	4.17E-06	4.43E-05
ENSG00000136026	CKAP4	0.009676532	7705.691218	1.502349604	0.326393159	4.60288324	4.17E-06	4.43E-05
ENSG00000181291	TMEM132E	7.44E-06	1688.034121	-2.663423784	0.578854938	-4.601193856	4.20E-06	4.46E-05
ENSG00000197296	FITM2	0.000127044	2383.822972	-2.14414091	0.466177253	-4.599411264	4.24E-06	4.50E-05
ENSG00000004975	DVL2	0.122230918	3631.933195	1.011399283	0.219997486	4.597322002	4.28E-06	4.54E-05
ENSG00000103642	LACTB	0.020035842	1051.231325	-1.529008871	0.332599737	-4.597143955	4.28E-06	4.54E-05
ENSG00000166851	PLK1	1.25E-06	1385.878942	2.971830122	0.64646886	4.597019756	4.29E-06	4.54E-05
ENSG00000119403	PHF19	0.000100542	2511.540157	2.242423534	0.487844701	4.596592989	4.29E-06	4.55E-05
ENSG00000176533	GNG7	0.001075684	3076.461606	-1.820803904	0.396264014	-4.594926205	4.33E-06	4.58E-05
ENSG00000124615	MOCS1	0.007177896	1878.414241	-1.609181983	0.350223585	-4.594727634	4.33E-06	4.58E-05
ENSG00000136111	TBC1D4	0.000633261	8585.640392	-1.810592433	0.394093588	-4.59432096	4.34E-06	4.59E-05
ENSG00000174327	SLC16A13	0.0228726	489.3404863	-1.629974017	0.354797067	-4.59410228	4.35E-06	4.59E-05
ENSG00000238105	GOLGA2P5	0.069368532	1918.722081	-1.158740221	0.25223908	-4.593817195	4.35E-06	4.59E-05
ENSG00000130332	LSM7	0.033343267	1493.197594	1.437369323	0.312916211	4.593463909	4.36E-06	4.60E-05
ENSG00000004487	KDM1A	0.012555482	6579.670499	1.437727239	0.313024512	4.59301806	4.37E-06	4.61E-05
ENSG00000183814	LIN9	0.00581414	233.5638556	2.129736922	0.463908571	4.590854869	4.41E-06	4.65E-05
ENSG00000183010	PYCR1	8.21E-05	971.0598199	2.629727605	0.572843949	4.590652668	4.42E-06	4.65E-05
ENSG00000149599	DUSP15	0.000475902	831.0283372	-2.294807394	0.49990439	-4.590492585	4.42E-06	4.66E-05
ENSG00000099330	OCEL1	0.025527374	663.2052385	-1.560739132	0.340058816	-4.58961526	4.44E-06	4.67E-05
ENSG00000166025	AMOTL1	0.010471016	10303.06964	1.502253497	0.327343293	4.589229496	4.45E-06	4.68E-05
ENSG00000158406	H4C8	3.04E-08	11937.07748	3.070458364	0.669097688	4.588953779	4.45E-06	4.68E-05
ENSG00000135956	TMEM127	0.096406692	7814.198189	-0.963579677	0.210024797	-4.5879329	4.48E-06	4.70E-05
ENSG00000135486	HNRNPA1	0.007542661	50588.78066	1.650085485	0.359724078	4.587086565	4.49E-06	4.72E-05
ENSG00000113209	PCDHB5	6.48E-06	2158.15241	2.765518252	0.603082184	4.585640774	4.53E-06	4.74E-05
ENSG00000183549	ACSM5	1.88E-07	906.1880233	-3.395063497	0.74040079	-4.585440133	4.53E-06	4.75E-05
ENSG00000140525	FANCI	2.06E-07	1193.599746	3.440803663	0.750936851	4.582014662	4.61E-06	4.82E-05
ENSG00000022567	SLC45A4	0.000821763	6155.246757	-1.788190781	0.390510023	-4.579116226	4.67E-06	4.88E-05
ENSG00000225151	GOLGA2P7	9.37E-05	10654.46667	2.185789707	0.477458732	4.577965718	4.70E-06	4.91E-05
ENSG00000176244	ACBD7	0.000131374	230.7423722	2.907711809	0.635294324	4.576952283	4.72E-06	4.93E-05
ENSG00000006747	SCIN	4.72E-10	5697.888209	-3.350794206	0.732205323	-4.57630408	4.73E-06	4.93E-05
ENSG00000010292	NCAPD2	0.000526292	7489.088724	1.913561071	0.418217199	4.575519796	4.75E-06	4.95E-05
ENSG00000196814	MVB12B	0.028607893	2380.201972	1.37883764	0.301542432	4.572615642	4.82E-06	5.01E-05
ENSG00000010379	SLC6A13	3.61E-09	4880.809418	-3.13770308	0.686599135	-4.569919942	4.88E-06	5.07E-05
ENSG00000283632	EXOC3L2	5.40E-06	3158.084492	-2.512357107	0.550196189	-4.566293179	4.96E-06	5.15E-05
ENSG00000179051	RCC2	0.003439252	11104.4105	1.688745465	0.369891876	4.565511095	4.98E-06	5.16E-05
ENSG00000082438	COBLL1	5.90E-10	7798.754528	-3.369263804	0.738225255	-4.564005068	5.02E-06	5.20E-05
ENSG00000135374	ELF5	2.24E-11	496.2768442	-4.922485862	1.078585627	-4.563834097	5.02E-06	5.20E-05
ENSG00000255874	PRECSIT	0.000269383	655.0724306	-2.416149407	0.529524484	-4.562866267	5.05E-06	5.22E-05
ENSG00000129250	KIF1C	0.049832378	20895.16708	-1.175607395	0.257771913	-4.560649698	5.10E-06	5.27E-05
ENSG00000164418	GRIK2	0.000468575	472.6954159	2.500138044	0.54833778	4.559485296	5.13E-06	5.30E-05
ENSG00000196526	AFAP1	0.059782947	6219.003395	1.165455636	0.255643333	4.558912691	5.14E-06	5.31E-05
ENSG00000121775	TMEM39B	0.046204004	468.5881693	1.524164945	0.334343401	4.558681103	5.15E-06	5.31E-05
ENSG00000164294	GPX8	0.004752921	1093.747831	1.893412086	0.415464067	4.557342586	5.18E-06	5.35E-05
ENSG00000125835	SNRPB	0.013077271	4789.264213	1.430401016	0.313921575	4.556555302	5.20E-06	5.36E-05
ENSG00000167925	GHDC	1.77E-05	5163.494707	-2.280075477	0.500500516	-4.555590663	5.22E-06	5.38E-05
ENSG00000262576	PCDHGA4	0.007763788	593.9843421	1.916151032	0.420733842	4.554306877	5.26E-06	5.41E-05
ENSG00000075213	SEMA3A	6.39E-07	672.6028513	3.863131977	0.848474706	4.553031399	5.29E-06	5.44E-05
ENSG00000164932	CTHRC1	8.69E-06	749.3151688	3.070462043	0.674848387	4.54985461	5.37E-06	5.52E-05
ENSG00000119917	IFIT3	0.003338982	1952.691026	-1.742175659	0.383001368	-4.548745259	5.40E-06	5.54E-05
ENSG00000143498	TAF1A	0.022217678	378.4984036	1.7855959	0.392557476	4.548622835	5.40E-06	5.54E-05
ENSG00000177685	CRACR2B	9.39E-06	1654.062341	-2.578494014	0.567051147	-4.547198304	5.44E-06	5.57E-05
ENSG00000082014	SMARCD3	0.01148281	2517.364972	1.528362456	0.33615475	4.546603781	5.45E-06	5.59E-05
ENSG00000198576	ARC	6.38E-07	1209.811416	-3.027251446	0.665924205	-4.545939948	5.47E-06	5.60E-05
ENSG00000187243	MAGED4B	2.42E-06	3316.471726	2.62149444	0.576768371	4.545142507	5.49E-06	5.62E-05
ENSG00000149136	SSRP1	0.013589563	9842.285853	1.451644773	0.319532155	4.543031899	5.55E-06	5.67E-05
ENSG00000106617	PRKAG2	0.000490499	1565.690835	-2.09179429	0.460472136	-4.542716324	5.55E-06	5.68E-05
ENSG00000234664	HMGN2P5	0.015525587	4045.766303	1.433919795	0.31581698	4.540350541	5.62E-06	5.74E-05
ENSG00000121210	TMEM131L	0.008151852	1364.98905	1.710734218	0.376849545	4.539568215	5.64E-06	5.76E-05
ENSG00000237424	FOXD2-AS1	0.000104494	852.5179656	2.596152226	0.572115543	4.537811039	5.68E-06	5.80E-05
ENSG00000169507	SLC38A11	1.81E-08	247.6484859	-4.271449509	0.941555281	-4.536589191	5.72E-06	5.83E-05
ENSG00000161267	BDH1	0.003124184	2432.264804	-1.704281264	0.375733852	-4.535873614	5.74E-06	5.85E-05
ENSG00000149476	TKFC	1.23E-05	8775.156271	-2.390791192	0.527104926	-4.535702619	5.74E-06	5.85E-05
ENSG00000144040	SFXN5	0.003176696	3901.929217	-1.617398858	0.356726772	-4.533999093	5.79E-06	5.89E-05
ENSG00000130307	USHBP1	0.001615598	702.5524828	-2.118677842	0.467355694	-4.533330542	5.81E-06	5.91E-05
ENSG00000179094	PER1	0.002150543	10293.96371	-1.683597545	0.371447675	-4.532529503	5.83E-06	5.93E-05
ENSG00000189057	FAM111B	1.62E-06	163.9836196	4.269935503	0.942357371	4.531121241	5.87E-06	5.96E-05
ENSG00000196177	ACADSB	1.06E-06	3049.91738	-2.700903932	0.596069879	-4.531186742	5.87E-06	5.96E-05
ENSG00000086544	ITPKC	0.005286544	3720.295058	-1.546511674	0.341336803	-4.530749863	5.88E-06	5.97E-05
ENSG00000109182	CWH43	1.18E-11	358.6484874	-5.155788177	1.138010362	-4.530528325	5.88E-06	5.97E-05
ENSG00000198113	TOR4A	6.55E-07	3391.615289	-2.637587844	0.582299708	-4.529605299	5.91E-06	5.99E-05
ENSG00000095002	MSH2	0.00077261	3503.821586	1.936375371	0.427626252	4.528195732	5.95E-06	6.02E-05
ENSG00000115520	COQ10B	0.005491049	1120.098471	-1.778056524	0.392732989	-4.527392843	5.97E-06	6.04E-05
ENSG00000203867	RBM20	2.25E-05	1679.668851	2.511316161	0.55473738	4.52703613	5.98E-06	6.05E-05
ENSG00000123473	STIL	0.003014575	273.4286246	2.296371386	0.507348757	4.526218607	6.00E-06	6.07E-05
ENSG00000166840	GLYATL1	1.35E-15	3798.635523	-4.536019452	1.002200559	-4.526059591	6.01E-06	6.07E-05
ENSG00000140263	SORD	1.22E-05	4896.290874	-2.3199428	0.512609712	-4.525748826	6.02E-06	6.07E-05
ENSG00000124831	LRRFIP1	0.020669697	11389.57612	-1.320829382	0.291853951	-4.525651874	6.02E-06	6.07E-05
ENSG00000186212	SOWAHB	0.000248103	1699.319555	-2.141372526	0.473187369	-4.525421995	6.03E-06	6.08E-05
ENSG00000189045	ANKDD1B	0.000458988	233.5332472	-2.744753894	0.606618377	-4.52467976	6.05E-06	6.09E-05
ENSG00000120322	PCDHB8	0.004854862	316.504733	2.137359573	0.472410727	4.524367143	6.06E-06	6.10E-05
ENSG00000153066	TXNDC11	0.107305822	1970.53483	-1.029222565	0.227503613	-4.523983387	6.07E-06	6.10E-05
ENSG00000143384	MCL1	0.078054437	33626.257	-1.081793354	0.239168571	-4.523141766	6.09E-06	6.13E-05
ENSG00000170088	TMEM192	5.51E-05	5351.038878	-2.205416851	0.487595022	-4.52305038	6.10E-06	6.13E-05
ENSG00000128849	CGNL1	0.000973616	54315.19545	-1.93156939	0.427066342	-4.522879003	6.10E-06	6.13E-05
ENSG00000163399	ATP1A1	0.000101586	80896.94376	-2.284720787	0.505902638	-4.516127446	6.30E-06	6.32E-05
ENSG00000180357	ZNF609	0.143907371	11191.46091	0.950293206	0.210463936	4.515230616	6.32E-06	6.34E-05
ENSG00000145022	TCTA	0.009504809	2321.689759	-1.517007914	0.335982787	-4.515135818	6.33E-06	6.34E-05
ENSG00000146374	RSPO3	7.36E-11	979.9943956	4.377053003	0.969523443	4.514643801	6.34E-06	6.35E-05
ENSG00000184445	KNTC1	0.000160736	1325.646275	2.368862164	0.524730384	4.514436817	6.35E-06	6.35E-05
ENSG00000008283	CYB561	0.011013307	3048.884394	-1.43744504	0.318545116	-4.512532036	6.41E-06	6.40E-05
ENSG00000105379	ETFB	0.000220434	13699.17225	-2.068987052	0.45850639	-4.512449769	6.41E-06	6.40E-05
ENSG00000198728	LDB1	0.049996939	5011.852644	1.189943048	0.263693012	4.512607433	6.40E-06	6.40E-05
ENSG00000130208	APOC1	3.63E-07	816.3130403	3.560978427	0.789476795	4.510554903	6.47E-06	6.45E-05
ENSG00000245532	NEAT1	0.000462252	109223.2107	-2.135589488	0.473718988	-4.508135715	6.54E-06	6.52E-05
ENSG00000111912	NCOA7	1.21E-05	5249.033793	-2.321408997	0.51496892	-4.507862335	6.55E-06	6.53E-05
ENSG00000134248	LAMTOR5	0.012527003	3813.573699	-1.404780292	0.31181706	-4.505142514	6.63E-06	6.61E-05
ENSG00000149557	FEZ1	0.03045139	729.9599943	1.579288794	0.350654305	4.503834043	6.67E-06	6.64E-05
ENSG00000183747	ACSM2A	3.56E-17	9485.088764	-4.956125328	1.100437656	-4.503776565	6.68E-06	6.64E-05
ENSG00000068650	ATP11A	0.102871609	8353.630313	-0.972789408	0.216016396	-4.503312841	6.69E-06	6.65E-05
ENSG00000082196	C1QTNF3	1.05E-05	1487.632854	2.734821643	0.607682878	4.500409247	6.78E-06	6.74E-05
ENSG00000117139	KDM5B	0.00184205	13168.39336	1.837878543	0.408597618	4.498015807	6.86E-06	6.81E-05
ENSG00000133135	RNF128	3.66E-07	694.1866651	-3.610422872	0.802853006	-4.496991165	6.89E-06	6.83E-05
ENSG00000143799	PARP1	0.002214123	14171.7449	1.784865604	0.397167741	4.493984322	6.99E-06	6.92E-05
ENSG00000151692	RNF144A	0.011137229	4159.57104	1.498647047	0.333501529	4.493673687	7.00E-06	6.93E-05
ENSG00000180998	GPR137C	0.000190251	215.8386527	2.825648767	0.628917462	4.492876946	7.03E-06	6.95E-05
ENSG00000231889	TRAF3IP2-AS1	0.088662873	540.2043782	1.329259002	0.296056135	4.48988839	7.13E-06	7.05E-05
ENSG00000185813	PCYT2	0.000869049	3161.938238	-1.862028159	0.414797704	-4.489003052	7.16E-06	7.07E-05
ENSG00000116285	ERRFI1	7.86E-07	5787.218915	-2.640986421	0.588586822	-4.486995499	7.22E-06	7.13E-05
ENSG00000130940	CASZ1	3.97E-06	5159.487964	-2.477772994	0.552226877	-4.486875047	7.23E-06	7.13E-05
ENSG00000200795	RNU4-1	0.004030246	1861.992646	1.858792949	0.414265274	4.486962979	7.22E-06	7.13E-05
ENSG00000121310	ECHDC2	0.01076452	9410.570171	-1.429807563	0.318765083	-4.485458537	7.28E-06	7.17E-05
ENSG00000107736	CDH23	0.000772439	877.4690445	2.236977982	0.499049882	4.482473725	7.38E-06	7.27E-05
ENSG00000131669	NINJ1	0.112777592	1302.270734	-1.064447044	0.237481974	-4.482222486	7.39E-06	7.28E-05
ENSG00000281406	BLACAT1	1.23E-05	390.8160258	3.101006375	0.691984285	4.481324852	7.42E-06	7.30E-05
ENSG00000120647	CCDC77	0.002175728	663.0057709	2.156895038	0.481656521	4.478077101	7.53E-06	7.40E-05
ENSG00000084774	CAD	0.015562162	6109.760169	1.409027832	0.314691755	4.477485704	7.55E-06	7.42E-05
ENSG00000145703	IQGAP2	0.002109442	5466.692476	-1.698440506	0.379430132	-4.476293167	7.60E-06	7.46E-05
ENSG00000117115	PADI2	4.96E-06	2496.014737	-2.509893967	0.560808691	-4.475490496	7.62E-06	7.48E-05
ENSG00000182107	TMEM30B	4.91E-06	1306.641554	-2.719305102	0.607659047	-4.475050796	7.64E-06	7.48E-05
ENSG00000170312	CDK1	1.34E-05	291.0715489	3.400277672	0.759866556	4.474835278	7.65E-06	7.49E-05
ENSG00000146904	EPHA1	0.007511392	691.8336222	-1.828449687	0.408636907	-4.474509411	7.66E-06	7.50E-05
ENSG00000056998	GYG2	0.009940808	616.1951203	1.864888591	0.416799092	4.474310591	7.67E-06	7.50E-05
ENSG00000062716	VMP1	0.000968853	22628.42494	-1.859756812	0.415681812	-4.473991299	7.68E-06	7.51E-05
ENSG00000179862	CITED4	6.20E-08	1988.197601	-3.184949394	0.712900868	-4.46759085	7.91E-06	7.72E-05
ENSG00000089159	PXN	0.068414101	8026.037654	-1.056961881	0.236606735	-4.467167349	7.93E-06	7.73E-05
ENSG00000188636	RTL6	0.04300585	7387.931076	1.223560077	0.273924143	4.466784364	7.94E-06	7.74E-05
ENSG00000122729	ACO1	0.000122342	4924.800318	-2.025538874	0.453496207	-4.466495737	7.95E-06	7.75E-05
ENSG00000104881	PPP1R13L	0.002946089	1537.346733	-1.830623693	0.410053676	-4.464351377	8.03E-06	7.82E-05
ENSG00000107295	SH3GL2	2.85E-05	321.6494316	-3.044572225	0.682043799	-4.463895473	8.05E-06	7.83E-05
ENSG00000120833	SOCS2	0.005312984	1438.517106	-1.702120645	0.381557189	-4.460984345	8.16E-06	7.92E-05
ENSG00000141542	RAB40B	0.015084602	1433.611173	-1.550703276	0.347666685	-4.460315999	8.18E-06	7.94E-05
ENSG00000134901	POGLUT2	0.026715859	772.2896905	1.614562668	0.362060631	4.459370971	8.22E-06	7.97E-05
ENSG00000135862	LAMC1	0.094270168	23182.91281	1.125892106	0.252595573	4.457291525	8.30E-06	8.03E-05
ENSG00000131196	NFATC1	0.039322229	915.3525999	-1.386920034	0.311323649	-4.454913849	8.39E-06	8.12E-05
ENSG00000205208	C4orf46	0.004921387	320.4892396	2.135162044	0.479313309	4.454627079	8.40E-06	8.13E-05
ENSG00000014257	ACP3	0.001180406	573.9802369	-2.281213436	0.512129035	-4.454372392	8.41E-06	8.13E-05
ENSG00000164032	H2AZ1	0.000154153	4605.14979	2.059819405	0.462501029	4.453653666	8.44E-06	8.16E-05
ENSG00000198894	CIPC	0.146820866	2072.126219	-0.923886736	0.207466626	-4.453182439	8.46E-06	8.17E-05
ENSG00000196372	ASB13	0.003539128	3309.974945	-1.610897687	0.361998776	-4.450008664	8.59E-06	8.28E-05
ENSG00000005513	SOX8	2.99E-06	559.1270179	3.20723742	0.720794517	4.449586318	8.60E-06	8.29E-05
ENSG00000142541	RPL13A	0.114228117	54059.20127	1.101031542	0.247461476	4.449304839	8.61E-06	8.30E-05
ENSG00000188452	CERKL	7.60E-08	363.5363156	-3.873065452	0.870600942	-4.448726464	8.64E-06	8.32E-05
ENSG00000169715	MT1E	3.82E-06	524.7661952	-3.150660806	0.708280033	-4.448326454	8.65E-06	8.33E-05
ENSG00000091972	CD200	6.13E-05	873.6213404	2.588415173	0.581918663	4.448070388	8.66E-06	8.34E-05
ENSG00000148154	UGCG	8.95E-08	16817.60948	-2.927574013	0.65831432	-4.447076308	8.70E-06	8.37E-05
ENSG00000244405	ETV5	6.66E-05	2146.151226	2.419563134	0.544298297	4.445288818	8.78E-06	8.43E-05
ENSG00000009954	BAZ1B	0.052013521	15485.78252	1.229960525	0.276796801	4.443550359	8.85E-06	8.50E-05
ENSG00000072840	EVC	0.00279337	26379.08847	-1.717956845	0.386868555	-4.44067325	8.97E-06	8.60E-05
ENSG00000269416	LINC01224	4.98E-07	148.8397014	3.930432298	0.885120808	4.440560276	8.97E-06	8.60E-05
ENSG00000118785	SPP1	2.20E-08	18851.41116	-3.193759564	0.719292202	-4.440142066	8.99E-06	8.62E-05
ENSG00000214814	FER1L6	5.25E-07	604.1074311	-3.633902825	0.818462673	-4.439912712	9.00E-06	8.62E-05
ENSG00000188883	KLRG2	5.78E-10	1716.454013	-3.712385375	0.836308107	-4.439016364	9.04E-06	8.65E-05
ENSG00000126603	GLIS2	0.002150543	7900.475469	-1.641684279	0.369850826	-4.438774136	9.05E-06	8.65E-05
ENSG00000164251	F2RL1	5.11E-08	1852.454956	-3.200229492	0.720959355	-4.438848695	9.04E-06	8.65E-05
ENSG00000160963	COL26A1	1.33E-07	4858.303043	2.814661951	0.634453675	4.436355342	9.15E-06	8.75E-05
ENSG00000156650	KAT6B	0.05344951	7457.933275	1.17974827	0.266045522	4.434384988	9.23E-06	8.81E-05
ENSG00000166689	PLEKHA7	0.004046599	7526.92403	-1.533547061	0.345825677	-4.434451127	9.23E-06	8.81E-05
ENSG00000180628	PCGF5	0.001971338	2746.36755	-1.779207838	0.401224358	-4.434446215	9.23E-06	8.81E-05
ENSG00000175906	ARL4D	0.001053667	1944.408232	-1.907847831	0.430265536	-4.434117238	9.25E-06	8.82E-05
ENSG00000108352	RAPGEFL1	0.033459728	428.2019574	1.631632069	0.367994118	4.433853665	9.26E-06	8.83E-05
ENSG00000136378	ADAMTS7	2.13E-05	3432.677118	2.361392149	0.532670945	4.433116109	9.29E-06	8.85E-05
ENSG00000130203	APOE	4.04E-06	170165.2868	-2.786056685	0.628831734	-4.430528129	9.40E-06	8.95E-05
ENSG00000170035	UBE2E3	0.003221731	2383.915833	1.770760427	0.399856991	4.428484348	9.49E-06	9.02E-05
ENSG00000124575	H1-3	3.14E-06	4647.375167	2.552783965	0.576665284	4.426803614	9.56E-06	9.09E-05
ENSG00000187323	DCC	3.14E-11	1567.005419	4.372933136	0.987921176	4.426398828	9.58E-06	9.10E-05
ENSG00000071539	TRIP13	0.006375011	261.3475154	2.123813404	0.480285463	4.42198144	9.78E-06	9.28E-05
ENSG00000167642	SPINT2	0.015124621	20600.9555	-1.388939716	0.314269911	-4.419575868	9.89E-06	9.38E-05
ENSG00000125378	BMP4	0.006329899	1727.695135	1.701791475	0.385188665	4.418072571	9.96E-06	9.44E-05
ENSG00000152076	CCDC74B	0.008218188	499.8851899	1.89259856	0.42853206	4.416469005	1.00E-05	9.50E-05
ENSG00000183742	MACC1	1.25E-08	3472.572875	-3.11183463	0.704682265	-4.415940044	1.01E-05	9.52E-05
ENSG00000180447	GAS1	0.001709001	5041.953327	1.788824172	0.40513647	4.415361998	1.01E-05	9.54E-05
ENSG00000127084	FGD3	0.00742055	1297.695157	-1.668997043	0.378207194	-4.412917228	1.02E-05	9.64E-05
ENSG00000104823	ECH1	0.00771342	8094.139451	-1.458634486	0.330813487	-4.409235247	1.04E-05	9.79E-05
ENSG00000253910	PCDHGB2	0.000177092	617.6822941	2.593456694	0.588332764	4.408145955	1.04E-05	9.84E-05
ENSG00000163072	NOSTRIN	6.33E-05	794.7484865	-2.637397125	0.598413124	-4.40731832	1.05E-05	9.87E-05
ENSG00000267519	MIR23AHG	3.58E-05	19110.13542	-2.309296781	0.52399469	-4.407099586	1.05E-05	9.88E-05
ENSG00000105281	SLC1A5	0.003885561	4815.587893	-1.571239648	0.356872997	-4.402797811	1.07E-05	0.000100697
ENSG00000138375	SMARCAL1	0.13213742	892.0906637	1.143498619	0.259748562	4.402328971	1.07E-05	0.000100874
ENSG00000127884	ECHS1	0.002303923	8116.590257	-1.653562934	0.375732288	-4.4009072	1.08E-05	0.000101497
ENSG00000234678	ELF3-AS1	0.000520243	250.9188731	-2.565121331	0.582901844	-4.400605964	1.08E-05	0.000101576
ENSG00000153046	CDYL	0.116967522	2528.666664	1.039826189	0.236320822	4.400061664	1.08E-05	0.00010177
ENSG00000089177	KIF16B	0.043094819	3537.78156	-1.182794243	0.268855423	-4.399369111	1.09E-05	0.000102055
ENSG00000164181	ELOVL7	6.34E-06	560.7059292	-3.092257411	0.70302277	-4.398516722	1.09E-05	0.000102292
ENSG00000081181	ARG2	1.84E-06	1160.328029	-2.94702362	0.670060745	-4.39814396	1.09E-05	0.000102345
ENSG00000099998	GGT5	1.44E-05	3595.372576	-2.359955276	0.536561776	-4.39829183	1.09E-05	0.000102345
ENSG00000198563	DDX39B	0.072136794	15453.94434	1.126617776	0.256154459	4.398197008	1.09E-05	0.000102345
ENSG00000140474	ULK3	0.067282818	2510.407012	-1.105412095	0.251368842	-4.397570068	1.09E-05	0.000102493
ENSG00000117266	CDK18	0.009425431	3154.592073	-1.468361363	0.333912062	-4.397449293	1.10E-05	0.000102509
ENSG00000145423	SFRP2	1.45E-12	2366.816524	4.416124433	1.004464112	4.396497972	1.10E-05	0.000102918
ENSG00000173890	GPR160	1.96E-05	910.398873	-2.750384609	0.625712293	-4.395605837	1.10E-05	0.0001033
ENSG00000187479	C11orf96	1.45E-07	5676.729875	-2.888116662	0.657154271	-4.394883803	1.11E-05	0.000103603
ENSG00000184292	TACSTD2	2.22E-12	5295.507358	-3.791599293	0.86298927	-4.393564814	1.12E-05	0.000104192
ENSG00000077782	FGFR1	0.056683663	17758.06067	1.198048574	0.27310792	4.386722193	1.15E-05	0.000107266
ENSG00000183186	C2CD4C	4.41E-06	964.7532673	3.054228385	0.696287416	4.386447775	1.15E-05	0.000107358
ENSG00000175334	BANF1	0.057567447	6677.777994	1.166097104	0.265852195	4.38626096	1.15E-05	0.000107408
ENSG00000116062	MSH6	0.000238801	6181.918824	2.014132147	0.459253646	4.38566392	1.16E-05	0.00010766
ENSG00000110628	SLC22A18	4.99E-05	1339.647911	-2.467047134	0.562757051	-4.383858236	1.17E-05	0.000108514
ENSG00000137310	TCF19	0.081015064	909.1683415	1.280690857	0.292212142	4.382743465	1.17E-05	0.000109027
ENSG00000140199	SLC12A6	0.000253659	11543.99813	-1.968999436	0.449441737	-4.380989287	1.18E-05	0.000109865
ENSG00000164867	NOS3	0.000500695	1591.637021	-2.1351913	0.48748328	-4.380029812	1.19E-05	0.000110262
ENSG00000162366	PDZK1IP1	1.55E-14	11891.42266	-4.530229317	1.034542263	-4.378969792	1.19E-05	0.000110712
ENSG00000104205	SGK3	0.014519895	1426.891219	-1.562709717	0.356886604	-4.378728982	1.19E-05	0.000110734
ENSG00000135931	ARMC9	0.097551061	2277.274422	1.119929285	0.255769392	4.378668133	1.19E-05	0.000110734
ENSG00000229989	MIR181A1HG	1.68E-06	396.8240889	3.408884543	0.778695501	4.377686193	1.20E-05	0.00011119
ENSG00000187068	C3orf70	1.26E-06	1786.324327	2.924309423	0.668311178	4.375670375	1.21E-05	0.000112178
ENSG00000146350	TBC1D32	0.02937677	781.6284614	1.550856416	0.354753045	4.37165075	1.23E-05	0.000114083
ENSG00000186198	SLC51B	3.45E-07	227.4165148	-3.79032734	0.867007511	-4.371735298	1.23E-05	0.000114083
ENSG00000101230	ISM1	0.000493292	427.941087	2.488713858	0.569320545	4.371375461	1.23E-05	0.000114182
ENSG00000196329	GIMAP5	0.003005467	1559.265881	-1.812057204	0.414949415	-4.366935195	1.26E-05	0.000116343
ENSG00000074657	ZNF532	0.002741571	6355.773381	1.701606704	0.389689547	4.366570042	1.26E-05	0.000116492
ENSG00000054793	ATP9A	0.075151212	13232.38662	1.14349069	0.261961649	4.365107242	1.27E-05	0.000117136
ENSG00000094916	CBX5	0.03902798	23188.90655	1.299879022	0.297786826	4.36513274	1.27E-05	0.000117136
ENSG00000148337	CIZ1	0.134374882	4988.107851	0.958213856	0.219516314	4.365114555	1.27E-05	0.000117136
ENSG00000148225	WDR31	6.76E-06	2452.46466	-2.518636405	0.577223894	-4.363361311	1.28E-05	0.000117982
ENSG00000115598	IL1RL2	2.91E-05	280.3223038	-3.109962414	0.712913623	-4.362327096	1.29E-05	0.000118495
ENSG00000006468	ETV1	4.12E-07	1123.177785	3.340985808	0.765989107	4.361662297	1.29E-05	0.000118809
ENSG00000120693	SMAD9	0.073836765	2377.890793	1.156529238	0.265411635	4.357492611	1.32E-05	0.000120951
ENSG00000116991	SIPA1L2	0.004896216	4502.274852	1.571338402	0.360694117	4.356429248	1.32E-05	0.000121478
ENSG00000205085	GARIN1A	0.002172943	438.6769343	-2.185320178	0.501637995	-4.356368933	1.32E-05	0.000121478
ENSG00000160888	IER2	0.004181897	27611.4221	-1.646443111	0.377955923	-4.356177555	1.32E-05	0.000121537
ENSG00000110492	MDK	1.82E-08	23935.42168	3.28669004	0.754647559	4.355264916	1.33E-05	0.000121996
ENSG00000164379	FOXQ1	5.55E-14	2969.04887	-4.209114216	0.96684909	-4.353434532	1.34E-05	0.000122972
ENSG00000081052	COL4A4	6.66E-09	22058.53478	-3.221020747	0.739940825	-4.35307884	1.34E-05	0.000123123
ENSG00000150712	MTMR12	0.146695727	4211.795517	-0.880273269	0.202229206	-4.352849348	1.34E-05	0.000123204
ENSG00000163449	TMEM169	0.002379188	758.2518253	2.061510737	0.473653879	4.352356914	1.35E-05	0.000123433
ENSG00000151779	NBAS	0.000146896	13414.68834	2.202639471	0.506152579	4.351730211	1.35E-05	0.000123738
ENSG00000197308	GATA3-AS1	3.87E-07	429.4474199	-3.842605496	0.883049134	-4.351519468	1.35E-05	0.000123799
ENSG00000205323	SARNP	0.090051939	3317.948964	1.090043086	0.25051605	4.351190619	1.35E-05	0.000123897
ENSG00000159173	TNNI1	8.68E-06	2462.524331	2.668079596	0.613448244	4.349314916	1.37E-05	0.000124913
ENSG00000152700	SAR1B	0.011045682	2455.935282	-1.499295313	0.344785074	-4.348492514	1.37E-05	0.000125284
ENSG00000127564	PKMYT1	5.64E-07	569.7177063	3.452530821	0.793992033	4.348319226	1.37E-05	0.000125285
ENSG00000139540	SLC39A5	3.44E-15	8548.934759	-4.376605474	1.00649464	-4.348364412	1.37E-05	0.000125285
ENSG00000254602	MIR130AHG	3.17E-06	1067.415743	3.006145613	0.691462684	4.347516767	1.38E-05	0.000125696
ENSG00000204965	PCDHA5	0.003341659	250.3112373	2.318450634	0.533332201	4.347104169	1.38E-05	0.000125883
ENSG00000197951	ZNF71	0.10433821	1222.416265	1.17528575	0.270515552	4.344614351	1.40E-05	0.00012722
ENSG00000263956	NBPF11	0.147971743	3382.093011	0.964718404	0.222048741	4.344624514	1.40E-05	0.00012722
ENSG00000104738	MCM4	0.001560073	3431.59171	1.787165418	0.411391211	4.344199318	1.40E-05	0.000127411
ENSG00000213462	ERV3-1	0.023524361	1390.613046	1.50683855	0.346907454	4.34363267	1.40E-05	0.000127691
ENSG00000221886	ZBED8	0.014959871	362.0924562	1.864628456	0.429462803	4.341769397	1.41E-05	0.000128679
ENSG00000176435	CLEC14A	4.06E-05	2233.022409	-2.306303462	0.531401586	-4.340038723	1.42E-05	0.000129567
ENSG00000197409	H3C4	7.22E-12	1228.434043	4.457123159	1.027432381	4.338118246	1.44E-05	0.000130581
ENSG00000204628	RACK1	0.078699029	20028.19566	1.144112668	0.263749893	4.337869704	1.44E-05	0.000130678
ENSG00000133561	GIMAP6	0.00739062	2427.978138	-1.536929002	0.354372986	-4.337037701	1.44E-05	0.000131122
ENSG00000249459	ZNF286B	0.001497988	1136.787575	2.064215256	0.476112231	4.33556444	1.45E-05	0.000131952
ENSG00000163909	HEYL	0.005308381	1679.329277	1.729548114	0.399120278	4.333400757	1.47E-05	0.00013305
ENSG00000117308	GALE	0.028623782	1655.047671	-1.381805602	0.318932989	-4.332589128	1.47E-05	0.00013349
ENSG00000132718	SYT11	0.003752081	3206.488287	1.733229813	0.40027236	4.33012615	1.49E-05	0.000134888
ENSG00000214274	ANG	0.022679836	197.9415906	-1.79559823	0.414894203	-4.327846035	1.51E-05	0.000136186
ENSG00000122756	CNTFR	9.11E-09	3234.046896	3.269833325	0.755658856	4.327128965	1.51E-05	0.000136577
ENSG00000172687	ZNF738	0.005341439	763.1409566	1.942444307	0.449029568	4.325871712	1.52E-05	0.000137306
ENSG00000077943	ITGA8	8.37E-07	7517.95945	2.822393397	0.652506915	4.325461281	1.52E-05	0.000137508
ENSG00000088367	EPB41L1	0.026602699	6405.740891	-1.225298271	0.283306271	-4.324995236	1.53E-05	0.000137746
ENSG00000075239	ACAT1	2.59E-09	4441.068997	-3.217998613	0.744332213	-4.323336487	1.54E-05	0.000138626
ENSG00000154928	EPHB1	0.018734599	706.9407461	1.684802931	0.389733388	4.322962777	1.54E-05	0.000138808
ENSG00000102098	SCML2	0.002872462	217.9123722	2.294478269	0.530794225	4.322726517	1.54E-05	0.000138903
ENSG00000103855	CD276	0.0006585	6213.530852	1.909346916	0.442003864	4.319751642	1.56E-05	0.000140681
ENSG00000204511	MCCD1	4.99E-13	558.6669283	-5.221626708	1.20890632	-4.319298048	1.57E-05	0.000140862
ENSG00000178035	IMPDH2	0.018564051	5681.64207	1.38414901	0.32053082	4.3183024	1.57E-05	0.000141444
ENSG00000008196	TFAP2B	1.42E-11	725.8322245	-4.680713593	1.084184061	-4.317268407	1.58E-05	0.000141944
ENSG00000119699	TGFB3	0.004326504	1362.935063	1.861499106	0.431278449	4.316234926	1.59E-05	0.000142556
ENSG00000151640	DPYSL4	1.95E-08	696.236642	3.846735739	0.891288111	4.315928479	1.59E-05	0.000142699
ENSG00000189091	SF3B3	0.048118284	11956.53801	1.233612793	0.285839129	4.315759	1.59E-05	0.000142754
ENSG00000120306	CYSTM1	0.00021151	1725.424423	-2.227357085	0.516167224	-4.315185047	1.59E-05	0.00014307
ENSG00000125089	SH3TC1	1.87E-05	12244.08381	-2.39678058	0.555503967	-4.314605698	1.60E-05	0.000143391
ENSG00000206384	COL6A6	3.31E-05	556.9747402	2.964827196	0.687444326	4.312825178	1.61E-05	0.00014444
ENSG00000180730	SHISA2	1.68E-06	2218.473721	2.808424555	0.651415089	4.311267272	1.62E-05	0.000145406
ENSG00000259781	HMGB1P6	0.019865735	4610.309382	1.36220669	0.316013676	4.310594109	1.63E-05	0.000145794
ENSG00000158966	CACHD1	0.00154509	3522.592834	1.825190471	0.423499713	4.309779716	1.63E-05	0.00014622
ENSG00000169994	MYO7B	2.08E-07	4434.546977	-2.871067509	0.666204691	-4.309587651	1.64E-05	0.000146291
ENSG00000145431	PDGFC	0.005602012	3954.657592	1.601917004	0.371743277	4.309202359	1.64E-05	0.00014649
ENSG00000123178	SPRYD7	0.001094542	1232.424143	-2.017233662	0.468177039	-4.308698405	1.64E-05	0.000146768
ENSG00000196866	H2AC7	5.91E-06	171.1041634	3.505244646	0.813798457	4.307263815	1.65E-05	0.00014761
ENSG00000092470	WDR76	0.005308381	526.4721413	2.025468077	0.470353686	4.306265979	1.66E-05	0.000148159
ENSG00000161955	TNFSF13	0.000240837	2323.833276	-2.069841232	0.480666412	-4.3061907	1.66E-05	0.000148159
ENSG00000117152	RGS4	7.51E-06	722.640056	3.141849267	0.729700744	4.305668167	1.66E-05	0.000148396
ENSG00000137474	MYO7A	0.00035811	2336.74598	-1.983600067	0.460784148	-4.304835732	1.67E-05	0.000148898
ENSG00000177084	POLE	0.001818661	5328.306031	1.725642499	0.400999691	4.303351197	1.68E-05	0.000149672
ENSG00000165379	LRFN5	4.03E-07	993.4087275	3.276536083	0.762069439	4.299524317	1.71E-05	0.000152049
ENSG00000131470	PSMC3IP	0.01117038	435.7400129	1.894155991	0.440654337	4.298507544	1.72E-05	0.00015269
ENSG00000184497	TMEM255B	0.013055768	505.6692716	-1.79505478	0.417633382	-4.298159239	1.72E-05	0.000152872
ENSG00000122176	FMOD	0.000389407	2150.931281	2.147788155	0.500001067	4.29556714	1.74E-05	0.000154494
ENSG00000109794	FAM149A	0.000243781	1572.743346	-2.19131932	0.510275184	-4.294387402	1.75E-05	0.000155259
ENSG00000134363	FST	0.000102384	382.9473517	2.877109451	0.670003634	4.294169922	1.75E-05	0.000155352
ENSG00000168062	BATF2	0.01436999	200.2807722	-1.856035558	0.432296813	-4.293428734	1.76E-05	0.000155813
ENSG00000197956	S100A6	0.001921637	3447.125539	-1.714520945	0.399347965	-4.293300821	1.76E-05	0.000155844
ENSG00000179151	EDC3	0.064664799	2839.698225	1.189643397	0.277161836	4.292233787	1.77E-05	0.000156476
ENSG00000112290	WASF1	0.067051563	863.5879819	1.319003713	0.307310682	4.29208547	1.77E-05	0.000156522
ENSG00000180488	MIGA1	0.006292091	2787.251015	-1.566735458	0.365527709	-4.28622898	1.82E-05	0.00016034
ENSG00000244509	APOBEC3C	0.001455323	1630.111256	1.970355047	0.459714581	4.286039927	1.82E-05	0.000160416
ENSG00000197093	GAL3ST4	0.000624638	493.5156824	2.456689663	0.573326437	4.284975369	1.83E-05	0.000161126
ENSG00000162461	SLC25A34	0.003749112	449.0221839	-2.259653079	0.527545511	-4.283332966	1.84E-05	0.000162137
ENSG00000090339	ICAM1	1.17E-05	3369.025231	-2.380584314	0.555814982	-4.283051721	1.84E-05	0.000162281
ENSG00000171130	ATP6V0E2	0.000919987	3291.957844	-1.817301734	0.424490497	-4.281136437	1.86E-05	0.000163615
ENSG00000137054	POLR1E	0.14888805	1311.588289	1.064970953	0.248869781	4.279229672	1.88E-05	0.000164845
ENSG00000100321	SYNGR1	0.00761744	2426.888743	-1.530751482	0.357993347	-4.275921589	1.90E-05	0.000167124
ENSG00000254122	PCDHGB7	4.51E-05	3638.964375	2.3045904	0.539037174	4.275383059	1.91E-05	0.000167466
ENSG00000006071	ABCC8	0.000230018	237.7515006	2.757609037	0.64505268	4.275013686	1.91E-05	0.000167618
ENSG00000128606	LRRC17	3.34E-06	482.7503825	3.35959621	0.786232314	4.273032476	1.93E-05	0.000169051
ENSG00000214826	DDX12P	0.000815489	925.0748398	2.193134061	0.513288412	4.272712983	1.93E-05	0.000169231
ENSG00000189221	MAOA	6.20E-08	2410.99679	-3.166749371	0.741302132	-4.271874089	1.94E-05	0.000169805
ENSG00000134323	MYCN	1.45E-06	2541.7504	2.74303345	0.642486162	4.269404713	1.96E-05	0.000171503
ENSG00000169242	EFNA1	0.018115197	1768.50794	-1.459990006	0.342206607	-4.266399238	1.99E-05	0.00017344
ENSG00000127863	TNFRSF19	0.000118802	7455.760164	2.153639838	0.50488077	4.265640455	1.99E-05	0.000173966
ENSG00000182963	GJC1	3.48E-06	4861.924767	2.488888759	0.583859876	4.262818632	2.02E-05	0.000176047
ENSG00000052795	FNIP2	0.003791221	7034.454706	-1.596963209	0.374834543	-4.260448348	2.04E-05	0.00017766
ENSG00000183615	FAM167B	0.005581703	652.4203506	-1.892317817	0.44414292	-4.260605612	2.04E-05	0.00017766
ENSG00000186684	CYP27C1	1.56E-05	545.227964	2.992731089	0.702444171	4.260454017	2.04E-05	0.00017766
ENSG00000092068	SLC7A8	0.000625338	11940.87124	-1.888590387	0.443641078	-4.257023258	2.07E-05	0.000180201
ENSG00000139625	MAP3K12	0.103694664	1897.260941	1.122093006	0.26360163	4.256775677	2.07E-05	0.000180334
ENSG00000164188	RANBP3L	2.19E-11	531.3204409	-4.930780237	1.158388193	-4.256587098	2.08E-05	0.000180419
ENSG00000176909	MAMSTR	0.075609322	195.6429475	1.527966973	0.358993294	4.256254918	2.08E-05	0.00018062
ENSG00000198805	PNP	3.71E-05	2675.0239	-2.301726427	0.540799718	-4.256153161	2.08E-05	0.000180635
ENSG00000182240	BACE2	0.005754574	4568.480771	-1.513172534	0.355593103	-4.255348372	2.09E-05	0.000181219
ENSG00000116667	C1orf21	0.001592327	2580.727042	1.848508273	0.434636781	4.2529955	2.11E-05	0.000182904
ENSG00000140451	PIF1	2.02E-08	920.7754665	3.639204	0.855816306	4.25231907	2.12E-05	0.000183349
ENSG00000123374	CDK2	0.017188886	1515.827313	1.547628896	0.364186489	4.249550557	2.14E-05	0.000185561
ENSG00000175707	KDF1	0.03066246	270.7842524	-1.626213646	0.382744498	-4.248823053	2.15E-05	0.000186095
ENSG00000125810	CD93	0.034657392	9931.34152	-1.225138548	0.28835888	-4.248658985	2.15E-05	0.000186163
ENSG00000157873	TNFRSF14	0.000449913	3122.972084	-1.947886838	0.458754182	-4.246036147	2.18E-05	0.000188215
ENSG00000117010	ZNF684	0.119520664	288.5248998	-1.246582035	0.294051134	-4.239337618	2.24E-05	0.000193491
ENSG00000249859	PVT1	0.004411422	313.5195789	2.211546582	0.521745683	4.238744383	2.25E-05	0.000193931
ENSG00000171223	JUNB	0.000168749	22308.99326	-2.120443993	0.500427757	-4.23726295	2.26E-05	0.000195143
ENSG00000135077	HAVCR2	0.000870717	1589.855253	-2.023680126	0.477610389	-4.237094026	2.26E-05	0.000195218
ENSG00000197705	KLHL14	0.017260943	1843.175539	1.549160509	0.365632108	4.23693783	2.27E-05	0.000195282
ENSG00000106211	HSPB1	0.045113647	3861.258535	-1.140690536	0.269286649	-4.235971374	2.28E-05	0.000195907
ENSG00000234771	SLC25A25-AS1	0.021148409	1699.855856	-1.421152755	0.335513547	-4.23575372	2.28E-05	0.000196025
ENSG00000101204	CHRNA4	2.84E-05	894.6870864	-2.64720822	0.625005522	-4.235495727	2.28E-05	0.000196122
ENSG00000197818	SLC9A8	0.060094087	1715.660008	-1.194968895	0.282133171	-4.2354782	2.28E-05	0.000196122
ENSG00000143878	RHOB	0.000869652	32905.61532	-1.926081711	0.454842775	-4.234609887	2.29E-05	0.000196809
ENSG00000196345	ZKSCAN7	0.136611184	739.4784034	1.178771757	0.278434478	4.233569659	2.30E-05	0.000197649
ENSG00000112667	DNPH1	0.000607637	3757.03038	-1.893699676	0.447319024	-4.233443186	2.30E-05	0.000197688
ENSG00000104723	TUSC3	0.024109973	2116.302021	1.440092551	0.34026993	4.232206326	2.31E-05	0.000198633
ENSG00000136943	CTSV	6.74E-05	747.5382943	-2.628983602	0.621235078	-4.231865994	2.32E-05	0.000198861
ENSG00000178764	ZHX2	0.14393544	4772.920701	0.941562028	0.222517968	4.231397744	2.32E-05	0.000199202
ENSG00000158716	DUSP23	0.000375977	1329.356883	-2.146055183	0.50723536	-4.230886395	2.33E-05	0.000199509
ENSG00000100154	TTC28	0.02163073	7376.473459	1.35251764	0.319798248	4.229284087	2.34E-05	0.000200715
ENSG00000239521	CASTOR3	0.113484453	1709.508663	1.089547775	0.257691284	4.228112633	2.36E-05	0.000201689
ENSG00000002549	LAP3	0.084983744	3641.901709	-1.025691889	0.242594321	-4.228012777	2.36E-05	0.000201705
ENSG00000182871	COL18A1	1.15E-06	223375.4064	-2.902745785	0.686578767	-4.227840887	2.36E-05	0.000201785
ENSG00000197421	GGT3P	0.000457371	262.484557	-2.730412204	0.645944971	-4.227004353	2.37E-05	0.000202463
ENSG00000066827	ZFAT	0.082218122	2395.853044	-1.056233488	0.249993771	-4.225039231	2.39E-05	0.000204088
ENSG00000221829	FANCG	0.003931006	1437.500563	1.843481229	0.436374528	4.224539034	2.39E-05	0.000204393
ENSG00000010319	SEMA3G	0.000914878	3023.278005	-1.798579423	0.426312241	-4.218925125	2.45E-05	0.000209167
ENSG00000106991	ENG	0.00761744	5945.607877	-1.46286501	0.346902494	-4.216934258	2.48E-05	0.000210945
ENSG00000047230	CTPS2	0.073836765	2238.564648	1.187821491	0.28174203	4.215989689	2.49E-05	0.000211599
ENSG00000129951	PLPPR3	1.26E-11	1310.492169	4.340886249	1.029623131	4.21599527	2.49E-05	0.000211599
ENSG00000159899	NPR2	0.107236728	1062.215319	1.179599311	0.279854733	4.215041494	2.50E-05	0.000212413
ENSG00000163050	COQ8A	0.000798361	6491.742828	-1.800624934	0.427280922	-4.214147749	2.51E-05	0.000213178
ENSG00000137700	SLC37A4	0.003587994	4720.403694	-1.590745432	0.377765514	-4.210933429	2.54E-05	0.000215921
ENSG00000170549	IRX1	2.06E-07	705.2741285	-3.385792682	0.804115071	-4.210582297	2.55E-05	0.000216168
ENSG00000236552	RPL13AP5	0.014395534	13384.32642	1.472107962	0.349626904	4.210511101	2.55E-05	0.000216168
ENSG00000158220	ESYT3	0.000261067	317.9858288	-2.648829829	0.629117146	-4.21039205	2.55E-05	0.000216204
ENSG00000269834	ZNF528-AS1	0.003551044	1039.101894	1.958976523	0.46569354	4.206578691	2.59E-05	0.000219644
ENSG00000132002	DNAJB1	0.030630205	9640.373107	-1.205455705	0.287119919	-4.198439836	2.69E-05	0.000227441
ENSG00000186594	MIR22HG	7.27E-05	1929.154408	-2.306477636	0.549601719	-4.196634685	2.71E-05	0.000229012
ENSG00000118557	PMFBP1	0.002191447	363.8697212	2.296968854	0.54746112	4.195674849	2.72E-05	0.000229901
ENSG00000101361	NOP56	0.01954416	4736.14962	1.353202716	0.322591896	4.194782111	2.73E-05	0.000230725
ENSG00000241484	ARHGAP8	0.004212038	1444.012481	-1.744080925	0.415897722	-4.193533249	2.75E-05	0.000231666
ENSG00000101003	GINS1	1.90E-05	2164.667108	2.50123636	0.59705465	4.189292153	2.80E-05	0.000235751
ENSG00000113648	MACROH2A1	0.105697748	9236.672389	1.031784188	0.246293815	4.189241168	2.80E-05	0.000235751
ENSG00000168646	AXIN2	0.002662203	2652.277156	1.77741106	0.424382049	4.188233374	2.81E-05	0.000236715
ENSG00000283154	IQCJ-SCHIP1	0.003587994	1829.827113	-1.72579756	0.412100078	-4.187811778	2.82E-05	0.00023707
ENSG00000156463	SH3RF2	2.88E-05	698.3066827	2.75079551	0.657268282	4.185194368	2.85E-05	0.000239732
ENSG00000160602	NEK8	0.036612586	813.306329	-1.411350195	0.337273796	-4.184582999	2.86E-05	0.000240292
ENSG00000071909	MYO3B	6.83E-06	659.5310943	-2.982883375	0.713245239	-4.182128686	2.89E-05	0.000242814
ENSG00000119772	DNMT3A	0.028474897	18275.06871	1.369431287	0.327483284	4.181683014	2.89E-05	0.000243203
ENSG00000112578	BYSL	0.048097105	654.4921092	1.456220764	0.348271744	4.181277381	2.90E-05	0.00024355
ENSG00000133138	TBC1D8B	0.008687492	663.7687078	-1.801099771	0.431059104	-4.178312802	2.94E-05	0.00024648
ENSG00000278705	H4C2	8.67E-05	14919.22325	2.265385051	0.542281106	4.177510564	2.95E-05	0.000247085
ENSG00000133874	RNF122	0.026791281	774.8387768	1.584146646	0.379274753	4.176778535	2.96E-05	0.000247793
ENSG00000246695	RASSF8-AS1	0.059165166	882.0705218	-1.314926861	0.31489718	-4.175733996	2.97E-05	0.000248755
ENSG00000102755	FLT1	0.002095708	3351.638536	-1.775591989	0.425229854	-4.175605196	2.97E-05	0.000248806
ENSG00000121621	KIF18A	4.03E-06	169.8498198	3.596706014	0.861388494	4.175474875	2.97E-05	0.000248815
ENSG00000141385	AFG3L2	0.145130386	8867.706843	-0.877851917	0.210308638	-4.174112503	2.99E-05	0.000249907
ENSG00000168003	SLC3A2	0.015781829	13292.02326	-1.379396335	0.330549326	-4.173042345	3.01E-05	0.000250995
ENSG00000106089	STX1A	0.098352021	234.4876932	1.389399781	0.333036	4.171920694	3.02E-05	0.00025209
ENSG00000163814	CDCP1	0.033061994	267.640763	-1.653614118	0.396370678	-4.171888111	3.02E-05	0.00025209
ENSG00000106070	GRB10	0.005531282	4649.522497	-1.516403247	0.363595645	-4.170575935	3.04E-05	0.000253456
ENSG00000204962	PCDHA8	0.004376502	172.8162585	2.283988683	0.547764432	4.169654962	3.05E-05	0.000254301
ENSG00000003400	CASP10	0.012421402	1184.812008	-1.565477226	0.375527018	-4.168747254	3.06E-05	0.000255134
ENSG00000134253	TRIM45	0.086660115	1052.564828	1.24001815	0.297487874	4.16829814	3.07E-05	0.000255487
ENSG00000138378	STAT4	3.94E-07	783.1027493	3.969317142	0.952451077	4.167476146	3.08E-05	0.000255923
ENSG00000125872	LRRN4	4.12E-07	2881.871411	2.870503485	0.688975045	4.166338833	3.10E-05	0.000257111
ENSG00000029993	HMGB3	1.14E-05	2473.230416	2.579912397	0.619397955	4.165193601	3.11E-05	0.000258131
ENSG00000078401	EDN1	0.000746439	288.5825804	-2.471005722	0.593407494	-4.164095919	3.13E-05	0.000259284
ENSG00000233725	NRAD1	1.99E-09	615.9110663	-4.121094297	0.989886481	-4.163198886	3.14E-05	0.000260028
ENSG00000130234	ACE2	7.80E-13	2536.963889	-4.222305856	1.014361203	-4.162526961	3.15E-05	0.000260703
ENSG00000145692	BHMT	2.85E-17	13987.60702	-4.967069076	1.193528908	-4.161666336	3.16E-05	0.000261595
ENSG00000257594	GALNT4	0.002288942	2435.864313	-1.699089434	0.408294787	-4.161428186	3.16E-05	0.000261775
ENSG00000169738	DCXR	6.62E-07	7057.586075	-2.699007308	0.648656906	-4.160916632	3.17E-05	0.00026227
ENSG00000080371	RAB21	0.015272534	6014.128271	-1.337057076	0.321378341	-4.160383283	3.18E-05	0.00026279
ENSG00000143578	CREB3L4	0.022911867	884.0458029	1.6062223	0.386202852	4.159012008	3.20E-05	0.000264
ENSG00000140931	CMTM3	0.025686362	1419.783675	1.508176513	0.36269661	4.158231625	3.21E-05	0.000264709
ENSG00000130958	SLC35D2	0.09954553	1066.241724	-1.134354105	0.272821069	-4.157868412	3.21E-05	0.00026495
ENSG00000130766	SESN2	0.000647821	3159.203008	-1.857523314	0.446760924	-4.157756895	3.21E-05	0.000264986
ENSG00000075618	FSCN1	8.34E-05	9502.440881	2.168950863	0.521812971	4.156567554	3.23E-05	0.000266182
ENSG00000107262	BAG1	0.000101063	12983.21738	-2.143130995	0.515847234	-4.154584637	3.26E-05	0.000268312
ENSG00000204520	MICA	0.062113961	517.9258465	-1.360912509	0.327635307	-4.153741919	3.27E-05	0.000269113
ENSG00000165359	INTS6L	0.021578081	1134.70614	1.544644154	0.371962324	4.152689814	3.29E-05	0.000270069
ENSG00000162521	RBBP4	0.108330808	9997.24001	1.015311809	0.244505619	4.152509111	3.29E-05	0.000270187
ENSG00000130829	DUSP9	2.08E-11	13531.60146	-3.76289245	0.906400045	-4.151469841	3.30E-05	0.000271322
ENSG00000102109	PCSK1N	1.69E-08	15112.68578	-3.241071396	0.780888398	-4.150492444	3.32E-05	0.000272388
ENSG00000114166	KAT2B	0.032561378	1799.792657	-1.314163815	0.316654711	-4.150147682	3.32E-05	0.000272703
ENSG00000214078	CPNE1	0.07115539	6631.410249	1.102909958	0.265836432	4.148829215	3.34E-05	0.000274086
ENSG00000161682	FAM171A2	5.31E-05	1502.706731	2.498465176	0.60243732	4.147261619	3.36E-05	0.000275486
ENSG00000214530	STARD10	0.00121822	2453.365473	-1.909398206	0.460545886	-4.145945634	3.38E-05	0.000276783
ENSG00000175318	GRAMD2A	0.010932358	173.3531337	-1.967222405	0.474627937	-4.144767408	3.40E-05	0.000278113
ENSG00000204381	LAYN	0.056409222	386.3644643	1.50291583	0.36301567	4.140085279	3.47E-05	0.000283554
ENSG00000172115	CYCS	0.047621784	3381.363616	-1.169177934	0.282464813	-4.139198517	3.49E-05	0.000284553
ENSG00000109956	B3GAT1	0.003780393	608.3119211	2.088053758	0.504617834	4.137891327	3.51E-05	0.000286079
ENSG00000123453	SARDH	3.08E-05	3610.31524	-2.402739013	0.580722719	-4.137497872	3.51E-05	0.000286171
ENSG00000125741	OPA3	0.00269657	4835.621291	-1.617701172	0.39096524	-4.137710989	3.51E-05	0.000286171
ENSG00000128591	FLNC	0.000763378	5515.310241	1.888661488	0.456467418	4.137560343	3.51E-05	0.000286171
ENSG00000184925	LCN12	0.001362766	566.1690734	-2.176893282	0.526538718	-4.134346077	3.56E-05	0.000289521
ENSG00000139651	ZNF740	0.08440819	6080.173824	1.074588522	0.259997734	4.133068799	3.58E-05	0.000290933
ENSG00000104825	NFKBIB	0.001313593	2159.135335	-1.874489508	0.454204004	-4.126977063	3.68E-05	0.000298125
ENSG00000127328	RAB3IP	0.000331174	5002.150586	-1.893730416	0.45908411	-4.125018434	3.71E-05	0.000300153
ENSG00000133460	SLC2A11	0.002435252	4326.495429	-1.686171916	0.408766239	-4.125027348	3.71E-05	0.000300153
ENSG00000149485	FADS1	0.004082154	2690.962853	1.7003788	0.412436786	4.12276222	3.74E-05	0.0003029
ENSG00000163026	WDCP	0.018466991	605.9168038	1.720390518	0.417491994	4.120774869	3.78E-05	0.000305419
ENSG00000141736	ERBB2	0.048218393	28047.69403	-1.184762378	0.287792298	-4.116727183	3.84E-05	0.000310402
ENSG00000204301	NOTCH4	9.89E-05	8203.675439	-2.092682383	0.508389185	-4.116299962	3.85E-05	0.000310763
ENSG00000149090	PAMR1	0.005353949	1396.650052	1.858160968	0.451518974	4.115355225	3.87E-05	0.000311824
ENSG00000162390	ACOT11	0.001362766	6146.997867	-1.833501786	0.445609653	-4.114591714	3.88E-05	0.00031275
ENSG00000170145	SIK2	0.056818945	6596.264458	-1.097008553	0.266652542	-4.113999987	3.89E-05	0.000313445
ENSG00000005156	LIG3	0.050716557	4015.086591	1.202802713	0.292417691	4.113303503	3.90E-05	0.000314176
ENSG00000115419	GLS	0.000442458	12461.19661	-1.955499597	0.475619194	-4.111481668	3.93E-05	0.000316449
ENSG00000134830	C5AR2	0.000273769	514.9363608	-2.590546639	0.630118574	-4.111205011	3.94E-05	0.000316719
ENSG00000136699	SMPD4	0.101063207	3778.113493	1.042797458	0.253764141	4.109317635	3.97E-05	0.00031905
ENSG00000151693	ASAP2	0.101063207	5634.757788	-0.97078704	0.236242975	-4.109273686	3.97E-05	0.00031905
ENSG00000180806	HOXC9	0.002405815	559.3011641	2.132230608	0.518909316	4.109062109	3.97E-05	0.000319233
ENSG00000151229	SLC2A13	0.001050313	2159.35325	-1.914431572	0.465914207	-4.10897874	3.97E-05	0.000319239
ENSG00000151718	WWC2	0.0192131	5151.662291	-1.312024863	0.31936027	-4.108290807	3.99E-05	0.000320081
ENSG00000117305	HMGCL	0.005223172	2476.29	-1.619190757	0.394148108	-4.108076947	3.99E-05	0.000320266
ENSG00000142661	MYOM3	2.12E-10	7568.033944	-3.428239145	0.834667802	-4.107309681	4.00E-05	0.000321113
ENSG00000110427	KIAA1549L	0.000886339	345.4655188	2.510791429	0.61167168	4.104802478	4.05E-05	0.000324504
ENSG00000159658	EFCAB14	0.104963261	7176.520351	-0.952681625	0.232107014	-4.104493054	4.05E-05	0.000324717
ENSG00000120053	GOT1	0.003582671	2949.020043	-1.641339445	0.400013034	-4.103214906	4.07E-05	0.000326405
ENSG00000141756	FKBP10	7.47E-05	9088.857599	2.198677379	0.536006701	4.10195875	4.10E-05	0.00032807
ENSG00000127528	KLF2	9.55E-05	1834.900655	-2.308027329	0.562754484	-4.101304203	4.11E-05	0.000328887
ENSG00000240990	HOXA11-AS	1.16E-07	1876.73891	3.317276259	0.808859747	4.101176094	4.11E-05	0.000328957
ENSG00000180801	ARSJ	0.000190647	1630.453966	-2.19802648	0.536031962	-4.10055115	4.12E-05	0.000329621
ENSG00000196476	C20orf96	0.03693835	917.9716184	1.476334346	0.360085738	4.099952287	4.13E-05	0.000330363
ENSG00000157557	ETS2	0.040022792	6301.794051	-1.183773131	0.288782499	-4.099185844	4.15E-05	0.000331345
ENSG00000147140	NONO	0.085484777	28330.4391	1.143827683	0.279122731	4.097938128	4.17E-05	0.000332795
ENSG00000148842	CNNM2	0.096349703	3531.686221	-0.989359721	0.241514482	-4.096481974	4.19E-05	0.000334552
ENSG00000141431	ASXL3	7.36E-05	2016.58032	2.403894798	0.586902265	4.095903087	4.21E-05	0.000335275
ENSG00000087076	HSD17B14	0.000118951	3259.144253	-2.268741228	0.553920453	-4.095788875	4.21E-05	0.000335326
ENSG00000097021	ACOT7	0.001553028	4100.55151	-1.696767803	0.414419565	-4.094323594	4.23E-05	0.000337224
ENSG00000144891	AGTR1	0.001162486	167.0721566	-2.447653044	0.59787946	-4.093890506	4.24E-05	0.00033774
ENSG00000234964	FABP5P7	0.000498388	404.8610522	2.652666256	0.648016619	4.09351578	4.25E-05	0.000338172
ENSG00000274605	PCCA-DT	0.005017167	270.9469702	-2.169953328	0.530147097	-4.093115551	4.26E-05	0.000338641
ENSG00000084731	KIF3C	0.001309554	2395.468272	1.90560324	0.465671455	4.092162447	4.27E-05	0.000339806
[truncated: 1,950 more rows]
